# Supplementary material
Source: publisher figshare collection journal article supplement (https://acs.figshare.com/ndownloader/files/4884847)
Supplement: Supplementary file 1 [file 4884847]

 
data_2 
  
_audit_creation_method            SHELXL-97 
_chemical_name_systematic 
; 
 ? 
; 
_chemical_name_common             ? 
_chemical_melting_point           ? 
_chemical_formula_moiety          ? 
_chemical_formula_sum 
 'C52 H61 Al P2 Pt' 
_chemical_formula_weight          970.02 
  
loop_ 
 _atom_type_symbol 
 _atom_type_description 
 _atom_type_scat_dispersion_real 
 _atom_type_scat_dispersion_imag 
 _atom_type_scat_source 
 'C'  'C'   0.0033   0.0016 
 'International Tables Vol C Tables 4.2.6.8 and 6.1.1.4' 
 'H'  'H'   0.0000   0.0000 
 'International Tables Vol C Tables 4.2.6.8 and 6.1.1.4' 
 'Al'  'Al'   0.0645   0.0514 
 'International Tables Vol C Tables 4.2.6.8 and 6.1.1.4' 
 'P'  'P'   0.1023   0.0942 
 'International Tables Vol C Tables 4.2.6.8 and 6.1.1.4' 
 'Pt'  'Pt'  -1.7033   8.3905 
 'International Tables Vol C Tables 4.2.6.8 and 6.1.1.4' 
  
_symmetry_cell_setting            Monoclinic 
_symmetry_space_group_name_H-M    P2(1)/n 
  
loop_ 
 _symmetry_equiv_pos_as_xyz 
 'x, y, z' 
 '-x+1/2, y+1/2, -z+1/2' 
 '-x, -y, -z' 
 'x-1/2, -y-1/2, z-1/2' 
  
_cell_length_a                    11.6412(3) 
_cell_length_b                    17.0920(4) 
_cell_length_c                    23.7775(5) 
_cell_angle_alpha                 90.00 
_cell_angle_beta                  100.7710(10) 
_cell_angle_gamma                 90.00 
_cell_volume                      4647.69(19) 
_cell_formula_units_Z             4 
_cell_measurement_temperature     193(2) 
_cell_measurement_reflns_used     9733 
_cell_measurement_theta_min       2.38 
_cell_measurement_theta_max       28.85 
  
_exptl_crystal_description        needle 
_exptl_crystal_colour             yellow 
_exptl_crystal_size_max           0.34 
_exptl_crystal_size_mid           0.25 
_exptl_crystal_size_min           0.22 
_exptl_crystal_density_meas       ? 
_exptl_crystal_density_diffrn     1.386 
_exptl_crystal_density_method     'not measured' 
_exptl_crystal_F_000              1976 
_exptl_absorpt_coefficient_mu     3.140 
_exptl_absorpt_correction_type    'multi-scan' 
_exptl_absorpt_correction_T_min   0.4184 
_exptl_absorpt_correction_T_max   0.5450 
_exptl_absorpt_process_details    'SADABS (Bruker-AXS)' 
  
_exptl_special_details 
; 
 ? 
; 
  
_diffrn_ambient_temperature       193(2) 
_diffrn_radiation_wavelength      0.71073 
_diffrn_radiation_type            MoK\a 
_diffrn_radiation_source          'fine-focus sealed tube' 
_diffrn_radiation_monochromator   graphite 
_diffrn_measurement_device_type   'CCD area detector' 
_diffrn_measurement_method        'phi and omega scans' 
_diffrn_detector_area_resol_mean  ? 
_diffrn_reflns_number             81719 
_diffrn_reflns_av_R_equivalents   0.0485 
_diffrn_reflns_av_sigmaI/netI     0.0381 
_diffrn_reflns_limit_h_min        -16 
_diffrn_reflns_limit_h_max        16 
_diffrn_reflns_limit_k_min        -23 
_diffrn_reflns_limit_k_max        24 
_diffrn_reflns_limit_l_min        -33 
_diffrn_reflns_limit_l_max        33 
_diffrn_reflns_theta_min          5.11 
_diffrn_reflns_theta_max          30.51 
_reflns_number_total              14107 
_reflns_number_gt                 10551 
_reflns_threshold_expression      >2sigma(I) 
  
_computing_data_collection        'Bruker SMART' 
_computing_cell_refinement        'Bruker SMART' 
_computing_data_reduction         'Bruker SAINT' 
_computing_structure_solution     'SHELXS-97 (Sheldrick, 2008)' 
_computing_structure_refinement   'SHELXL-97 (Sheldrick, 2008)' 
_computing_molecular_graphics     'Bruker SHELXTL' 
_computing_publication_material   'Bruker SHELXTL' 
  
_refine_special_details 
; 
 Refinement of F^2^ against ALL reflections.  The weighted R-factor wR and 
 goodness of fit S are based on F^2^, conventional R-factors R are based 
 on F, with F set to zero for negative F^2^. The threshold expression of 
 F^2^ > 2sigma(F^2^) is used only for calculating R-factors(gt) etc. and is 
 not relevant to the choice of reflections for refinement.  R-factors based 
 on F^2^ are statistically about twice as large as those based on F, and R- 
 factors based on ALL data will be even larger. 
; 
  
_refine_ls_structure_factor_coef  Fsqd 
_refine_ls_matrix_type            full 
_refine_ls_weighting_scheme       calc 
_refine_ls_weighting_details 
 'calc w=1/[\s^2^(Fo^2^)+(0.0334P)^2^+2.8318P] where P=(Fo^2^+2Fc^2^)/3' 
_atom_sites_solution_primary      direct 
_atom_sites_solution_secondary    difmap 
_atom_sites_solution_hydrogens    geom 
_refine_ls_hydrogen_treatment     constr 
_refine_ls_extinction_method      none 
_refine_ls_extinction_coef        ? 
_refine_ls_number_reflns          14107 
_refine_ls_number_parameters      572 
_refine_ls_number_restraints      195 
_refine_ls_R_factor_all           0.0526 
_refine_ls_R_factor_gt            0.0305 
_refine_ls_wR_factor_ref          0.0760 
_refine_ls_wR_factor_gt           0.0679 
_refine_ls_goodness_of_fit_ref    1.020 
_refine_ls_restrained_S_all       1.017 
_refine_ls_shift/su_max           0.002 
_refine_ls_shift/su_mean          0.000 
  
loop_ 
 _atom_site_label 
 _atom_site_type_symbol 
 _atom_site_fract_x 
 _atom_site_fract_y 
 _atom_site_fract_z 
 _atom_site_U_iso_or_equiv 
 _atom_site_adp_type 
 _atom_site_occupancy 
 _atom_site_symmetry_multiplicity 
 _atom_site_calc_flag 
 _atom_site_refinement_flags 
 _atom_site_disorder_assembly 
 _atom_site_disorder_group 
Pt1 Pt 0.776681(9) 0.277834(6) 0.084294(5) 0.02994(4) Uani 1 1 d . A . 
P1 P 0.79431(6) 0.38816(4) 0.13955(3) 0.02740(14) Uani 1 1 d . . . 
Al1 Al 0.99555(7) 0.29356(5) 0.12411(4) 0.03036(17) Uani 1 1 d . . . 
C1 C 0.9513(2) 0.39919(16) 0.15562(11) 0.0295(5) Uani 1 1 d . . . 
C2 C 0.9971(2) 0.47175(17) 0.15698(12) 0.0326(6) Uani 1 1 d . . . 
H2 H 0.9442 0.5146 0.1527 0.039 Uiso 1 1 calc R . . 
C3 C 1.1227(2) 0.48996(16) 0.16455(12) 0.0316(6) Uani 1 1 d . . . 
C4 C 1.1631(3) 0.55138(18) 0.13546(13) 0.0409(7) Uani 1 1 d . . . 
H4 H 1.1091 0.5837 0.1110 0.049 Uiso 1 1 calc R . . 
C5 C 1.2825(3) 0.5659(2) 0.14204(15) 0.0489(8) Uani 1 1 d . . . 
H5 H 1.3093 0.6070 0.1209 0.059 Uiso 1 1 calc R . . 
C6 C 1.3621(3) 0.5216(2) 0.17863(16) 0.0496(8) Uani 1 1 d . . . 
H6 H 1.4434 0.5320 0.1829 0.060 Uiso 1 1 calc R . . 
C7 C 1.3228(3) 0.4623(2) 0.20884(16) 0.0536(9) Uani 1 1 d . . . 
H7 H 1.3771 0.4319 0.2347 0.064 Uiso 1 1 calc R . . 
C8 C 1.2050(3) 0.4463(2) 0.20197(15) 0.0461(8) Uani 1 1 d . . . 
H8 H 1.1792 0.4047 0.2231 0.055 Uiso 1 1 calc R . . 
C9 C 0.7232(2) 0.48239(15) 0.11704(12) 0.0290(5) Uani 1 1 d . . . 
C10 C 0.6850(2) 0.49918(17) 0.05822(12) 0.0342(6) Uani 1 1 d . . . 
C11 C 0.6267(3) 0.56897(18) 0.04277(14) 0.0420(7) Uani 1 1 d . . . 
H11 H 0.6004 0.5796 0.0032 0.050 Uiso 1 1 calc R . . 
C12 C 0.6051(3) 0.62364(17) 0.08228(15) 0.0441(7) Uani 1 1 d . . . 
C13 C 0.6465(3) 0.60763(16) 0.13936(14) 0.0398(7) Uani 1 1 d . . . 
H13 H 0.6339 0.6450 0.1672 0.048 Uiso 1 1 calc R . . 
C14 C 0.7058(2) 0.53904(16) 0.15772(12) 0.0332(6) Uani 1 1 d . . . 
C15 C 0.7060(3) 0.4469(2) 0.01060(13) 0.0504(8) Uani 1 1 d . . . 
H15A H 0.7885 0.4496 0.0073 0.076 Uiso 1 1 calc R . . 
H15B H 0.6571 0.4639 -0.0254 0.076 Uiso 1 1 calc R . . 
H15C H 0.6861 0.3929 0.0188 0.076 Uiso 1 1 calc R . . 
C16 C 0.5421(4) 0.6994(2) 0.06336(19) 0.0654(11) Uani 1 1 d . . . 
H16A H 0.5024 0.7183 0.0936 0.098 Uiso 1 1 calc R . . 
H16B H 0.4844 0.6902 0.0283 0.098 Uiso 1 1 calc R . . 
H16C H 0.5989 0.7386 0.0559 0.098 Uiso 1 1 calc R . . 
C17 C 0.7493(3) 0.53066(18) 0.22140(13) 0.0477(8) Uani 1 1 d . . . 
H17A H 0.7591 0.5826 0.2390 0.071 Uiso 1 1 calc R . . 
H17B H 0.8246 0.5033 0.2282 0.071 Uiso 1 1 calc R . . 
H17C H 0.6925 0.5006 0.2382 0.071 Uiso 1 1 calc R . . 
C18 C 0.7253(2) 0.35269(15) 0.19899(13) 0.0327(6) Uani 1 1 d . . . 
C19 C 0.7852(3) 0.33519(17) 0.25472(13) 0.0400(7) Uani 1 1 d . . . 
C20 C 0.7249(4) 0.29332(19) 0.29114(17) 0.0538(9) Uani 1 1 d . . . 
H20 H 0.7654 0.2806 0.3285 0.065 Uiso 1 1 calc R . . 
C21 C 0.6109(4) 0.27004(19) 0.27538(19) 0.0582(11) Uani 1 1 d . . . 
C22 C 0.5517(3) 0.29238(18) 0.22238(19) 0.0534(10) Uani 1 1 d . . . 
H22 H 0.4711 0.2797 0.2119 0.064 Uiso 1 1 calc R . . 
C23 C 0.6056(3) 0.33320(17) 0.18307(15) 0.0402(7) Uani 1 1 d . . . 
C24 C 0.9073(3) 0.3611(2) 0.27963(14) 0.0520(9) Uani 1 1 d . . . 
H24A H 0.9515 0.3684 0.2488 0.078 Uiso 1 1 calc R . . 
H24B H 0.9457 0.3211 0.3063 0.078 Uiso 1 1 calc R . . 
H24C H 0.9046 0.4106 0.3001 0.078 Uiso 1 1 calc R . . 
C25 C 0.5525(5) 0.2209(3) 0.3155(3) 0.0896(18) Uani 1 1 d . . . 
H25A H 0.4681 0.2188 0.3009 0.134 Uiso 1 1 calc R . . 
H25B H 0.5672 0.2444 0.3538 0.134 Uiso 1 1 calc R . . 
H25C H 0.5846 0.1677 0.3177 0.134 Uiso 1 1 calc R . . 
C26 C 0.5317(3) 0.3540(2) 0.12608(16) 0.0474(8) Uani 1 1 d . . . 
H26A H 0.5211 0.4109 0.1236 0.071 Uiso 1 1 calc R . . 
H26B H 0.4553 0.3285 0.1223 0.071 Uiso 1 1 calc R . . 
H26C H 0.5707 0.3362 0.0952 0.071 Uiso 1 1 calc R . . 
C27 C 1.0792(2) 0.3094(2) 0.05695(13) 0.0383(6) Uani 1 1 d . . . 
C28 C 1.0309(3) 0.3794(2) 0.01962(14) 0.0500(8) Uani 1 1 d . . . 
H28A H 1.0727 0.3843 -0.0124 0.075 Uiso 1 1 calc R . . 
H28B H 1.0417 0.4273 0.0427 0.075 Uiso 1 1 calc R . . 
H28C H 0.9474 0.3715 0.0047 0.075 Uiso 1 1 calc R . . 
C29 C 1.2103(3) 0.3228(2) 0.07885(15) 0.0506(8) Uani 1 1 d . . . 
H29A H 1.2508 0.3252 0.0463 0.076 Uiso 1 1 calc R . . 
H29B H 1.2420 0.2795 0.1041 0.076 Uiso 1 1 calc R . . 
H29C H 1.2216 0.3721 0.1001 0.076 Uiso 1 1 calc R . . 
C30 C 1.0665(3) 0.2363(2) 0.01850(15) 0.0487(8) Uani 1 1 d . . . 
H30A H 0.9834 0.2260 0.0041 0.073 Uiso 1 1 calc R . . 
H30B H 1.1017 0.1912 0.0407 0.073 Uiso 1 1 calc R . . 
H30C H 1.1062 0.2451 -0.0138 0.073 Uiso 1 1 calc R . . 
C31 C 1.0555(3) 0.20770(18) 0.18146(13) 0.0391(7) Uani 1 1 d . . . 
C32 C 1.1489(3) 0.2400(2) 0.22954(17) 0.0576(9) Uani 1 1 d . . . 
H32A H 1.1777 0.1979 0.2565 0.086 Uiso 1 1 calc R . . 
H32B H 1.1152 0.2817 0.2496 0.086 Uiso 1 1 calc R . . 
H32C H 1.2139 0.2611 0.2133 0.086 Uiso 1 1 calc R . . 
C33 C 1.1130(4) 0.1401(2) 0.15450(17) 0.0610(10) Uani 1 1 d . . . 
H33A H 1.1797 0.1601 0.1391 0.091 Uiso 1 1 calc R . . 
H33B H 1.0559 0.1168 0.1235 0.091 Uiso 1 1 calc R . . 
H33C H 1.1401 0.1004 0.1837 0.091 Uiso 1 1 calc R . . 
C34 C 0.9570(3) 0.1739(2) 0.20885(15) 0.0499(8) Uani 1 1 d . . . 
H34A H 0.8974 0.1503 0.1791 0.075 Uiso 1 1 calc R . . 
H34B H 0.9216 0.2158 0.2280 0.075 Uiso 1 1 calc R . . 
H34C H 0.9890 0.1339 0.2370 0.075 Uiso 1 1 calc R . . 
P2 P 0.73448(7) 0.16090(4) 0.04045(3) 0.03553(16) Uani 1 1 d D . . 
C35 C 0.5779(14) 0.139(2) 0.0291(12) 0.053(3) Uani 0.192(10) 1 d PDU A 1 
C36 C 0.5272(17) 0.1612(17) 0.0739(12) 0.062(3) Uani 0.192(10) 1 d PDU A 1 
H36 H 0.5736 0.1830 0.1073 0.075 Uiso 0.192(10) 1 calc PR A 1 
C37 C 0.4049(18) 0.1520(14) 0.0703(14) 0.067(2) Uani 0.192(10) 1 d PDU A 1 
H37 H 0.3674 0.1670 0.1009 0.080 Uiso 0.192(10) 1 calc PR A 1 
C38 C 0.3432(18) 0.1202(15) 0.0206(14) 0.068(3) Uani 0.192(10) 1 d PDU A 1 
H38 H 0.2620 0.1108 0.0180 0.081 Uiso 0.192(10) 1 calc PR A 1 
C39 C 0.3927(16) 0.1016(13) -0.0250(12) 0.061(3) Uani 0.192(10) 1 d PDU A 1 
H39 H 0.3452 0.0836 -0.0595 0.073 Uiso 0.192(10) 1 calc PR A 1 
C40 C 0.5130(15) 0.1090(15) -0.0214(11) 0.054(3) Uani 0.192(10) 1 d PDU A 1 
H40 H 0.5495 0.0942 -0.0523 0.065 Uiso 0.192(10) 1 calc PR A 1 
C35' C 0.5805(4) 0.1439(5) 0.0464(3) 0.0494(13) Uani 0.808(10) 1 d PDU A 2 
C36' C 0.5495(5) 0.1570(4) 0.0990(3) 0.0627(15) Uani 0.808(10) 1 d PDU A 2 
H36' H 0.6058 0.1762 0.1301 0.075 Uiso 0.808(10) 1 calc PR A 2 
C37' C 0.4342(5) 0.1420(3) 0.1065(4) 0.0729(17) Uani 0.808(10) 1 d PDU A 2 
H37' H 0.4126 0.1489 0.1428 0.087 Uiso 0.808(10) 1 calc PR A 2 
C38' C 0.3529(5) 0.1167(3) 0.0596(4) 0.0723(17) Uani 0.808(10) 1 d PDU A 2 
H38' H 0.2743 0.1084 0.0638 0.087 Uiso 0.808(10) 1 calc PR A 2 
C39' C 0.3830(5) 0.1035(3) 0.0079(4) 0.0677(16) Uani 0.808(10) 1 d PDU A 2 
H39' H 0.3263 0.0851 -0.0233 0.081 Uiso 0.808(10) 1 calc PR A 2 
C40' C 0.4973(4) 0.1170(3) 0.0010(3) 0.0551(13) Uani 0.808(10) 1 d PDU A 2 
H40' H 0.5186 0.1078 -0.0351 0.066 Uiso 0.808(10) 1 calc PR A 2 
C41 C 0.8043(3) 0.07002(18) 0.06982(14) 0.0439(7) Uani 1 1 d . A . 
C42 C 0.7654(5) 0.0307(2) 0.11343(18) 0.0712(13) Uani 1 1 d . . . 
H42 H 0.6993 0.0499 0.1273 0.085 Uiso 1 1 calc R A . 
C43 C 0.8209(6) -0.0359(2) 0.1371(2) 0.0939(19) Uani 1 1 d . A . 
H43 H 0.7941 -0.0613 0.1678 0.113 Uiso 1 1 calc R . . 
C44 C 0.9116(5) -0.0649(3) 0.1176(2) 0.0876(16) Uani 1 1 d . . . 
H44 H 0.9474 -0.1120 0.1332 0.105 Uiso 1 1 calc R A . 
C45 C 0.9530(5) -0.0275(3) 0.0755(2) 0.0896(16) Uani 1 1 d . A . 
H45 H 1.0193 -0.0476 0.0623 0.108 Uiso 1 1 calc R . . 
C46 C 0.8986(4) 0.0406(2) 0.05129(17) 0.0641(11) Uani 1 1 d . . . 
H46 H 0.9280 0.0665 0.0216 0.077 Uiso 1 1 calc R A . 
C47 C 0.7431(3) 0.15492(17) -0.03518(13) 0.0406(7) Uani 1 1 d . A . 
C48 C 0.7277(4) 0.0851(2) -0.06556(17) 0.0630(11) Uani 1 1 d . . . 
H48 H 0.7093 0.0388 -0.0470 0.076 Uiso 1 1 calc R A . 
C49 C 0.7386(5) 0.0820(3) -0.12237(18) 0.0817(15) Uani 1 1 d . A . 
H49 H 0.7265 0.0343 -0.1431 0.098 Uiso 1 1 calc R . . 
C50 C 0.7674(5) 0.1496(3) -0.14869(17) 0.0773(14) Uani 1 1 d . . . 
H50 H 0.7791 0.1475 -0.1871 0.093 Uiso 1 1 calc R A . 
C51 C 0.7791(4) 0.2192(2) -0.12013(16) 0.0592(10) Uani 1 1 d . A . 
H51 H 0.7950 0.2657 -0.1391 0.071 Uiso 1 1 calc R . . 
C52 C 0.7677(3) 0.22158(19) -0.06345(14) 0.0432(7) Uani 1 1 d . . . 
H52 H 0.7769 0.2700 -0.0435 0.052 Uiso 1 1 calc R A . 
  
loop_ 
 _atom_site_aniso_label 
 _atom_site_aniso_U_11 
 _atom_site_aniso_U_22 
 _atom_site_aniso_U_33 
 _atom_site_aniso_U_23 
 _atom_site_aniso_U_13 
 _atom_site_aniso_U_12 
Pt1 0.02368(5) 0.02951(5) 0.03661(6) 0.00059(4) 0.00560(4) 0.00128(4) 
P1 0.0226(3) 0.0278(3) 0.0320(3) 0.0009(3) 0.0056(3) 0.0014(2) 
Al1 0.0215(4) 0.0358(4) 0.0337(4) 0.0045(3) 0.0050(3) 0.0045(3) 
C1 0.0242(13) 0.0344(14) 0.0295(13) 0.0027(11) 0.0038(10) 0.0021(10) 
C2 0.0288(14) 0.0368(14) 0.0314(14) 0.0037(11) 0.0036(11) 0.0008(11) 
C3 0.0304(14) 0.0324(14) 0.0316(14) -0.0037(11) 0.0045(11) -0.0060(11) 
C4 0.0415(17) 0.0376(16) 0.0427(17) -0.0002(13) 0.0052(13) -0.0086(13) 
C5 0.056(2) 0.0432(18) 0.052(2) -0.0092(15) 0.0200(17) -0.0200(16) 
C6 0.0339(17) 0.055(2) 0.061(2) -0.0225(17) 0.0134(16) -0.0153(15) 
C7 0.0344(17) 0.060(2) 0.062(2) -0.0002(17) -0.0030(16) 0.0014(15) 
C8 0.0338(16) 0.0505(19) 0.0513(19) 0.0109(15) 0.0014(14) -0.0064(14) 
C9 0.0229(12) 0.0255(12) 0.0387(15) 0.0015(10) 0.0057(11) 0.0001(9) 
C10 0.0280(14) 0.0363(14) 0.0366(15) 0.0014(12) 0.0014(11) 0.0007(11) 
C11 0.0369(16) 0.0421(17) 0.0429(17) 0.0078(13) -0.0033(13) 0.0000(13) 
C12 0.0372(17) 0.0308(15) 0.061(2) 0.0082(14) 0.0007(15) 0.0032(12) 
C13 0.0407(17) 0.0259(13) 0.0532(18) -0.0023(12) 0.0098(14) 0.0018(12) 
C14 0.0302(14) 0.0302(13) 0.0392(15) 0.0029(11) 0.0067(12) 0.0004(11) 
C15 0.063(2) 0.0514(19) 0.0334(16) 0.0020(14) -0.0005(15) 0.0149(17) 
C16 0.072(3) 0.0348(17) 0.080(3) 0.0057(18) -0.012(2) 0.0169(17) 
C17 0.069(2) 0.0355(16) 0.0388(17) -0.0025(13) 0.0124(16) 0.0100(15) 
C18 0.0316(14) 0.0259(13) 0.0450(16) 0.0036(11) 0.0184(12) 0.0036(10) 
C19 0.0456(18) 0.0328(14) 0.0448(17) 0.0054(13) 0.0170(14) 0.0104(13) 
C20 0.073(3) 0.0406(18) 0.055(2) 0.0146(15) 0.0308(19) 0.0164(17) 
C21 0.070(3) 0.0376(18) 0.081(3) 0.0127(17) 0.052(2) 0.0077(17) 
C22 0.046(2) 0.0363(17) 0.088(3) -0.0046(17) 0.039(2) -0.0031(14) 
C23 0.0333(15) 0.0310(14) 0.062(2) -0.0024(13) 0.0222(14) 0.0023(12) 
C24 0.052(2) 0.064(2) 0.0386(18) 0.0144(16) 0.0056(15) 0.0128(17) 
C25 0.108(4) 0.061(3) 0.124(4) 0.027(3) 0.082(4) 0.000(2) 
C26 0.0254(15) 0.0492(19) 0.069(2) -0.0057(16) 0.0125(15) -0.0041(13) 
C27 0.0239(14) 0.0549(18) 0.0369(15) -0.0012(13) 0.0077(12) -0.0002(12) 
C28 0.048(2) 0.065(2) 0.0389(17) 0.0112(16) 0.0130(15) 0.0020(17) 
C29 0.0274(16) 0.077(2) 0.0484(19) -0.0046(17) 0.0090(14) -0.0059(16) 
C30 0.0358(17) 0.068(2) 0.0432(18) -0.0106(16) 0.0103(14) -0.0007(15) 
C31 0.0371(16) 0.0401(16) 0.0383(16) 0.0073(12) 0.0026(13) 0.0105(12) 
C32 0.047(2) 0.062(2) 0.057(2) 0.0080(18) -0.0057(17) 0.0020(17) 
C33 0.060(2) 0.055(2) 0.067(2) 0.0109(18) 0.0099(19) 0.0271(18) 
C34 0.052(2) 0.0471(19) 0.051(2) 0.0157(15) 0.0095(16) 0.0058(15) 
P2 0.0313(4) 0.0295(3) 0.0461(4) 0.0006(3) 0.0081(3) 0.0002(3) 
C35 0.035(4) 0.028(5) 0.099(6) -0.010(5) 0.021(4) 0.002(4) 
C36 0.044(4) 0.040(4) 0.109(5) -0.016(5) 0.032(4) -0.005(4) 
C37 0.047(4) 0.044(4) 0.117(5) -0.021(4) 0.035(4) -0.004(4) 
C38 0.046(5) 0.043(5) 0.120(6) -0.017(5) 0.028(5) -0.003(5) 
C39 0.038(5) 0.037(5) 0.109(6) -0.010(5) 0.018(5) -0.007(4) 
C40 0.030(5) 0.030(5) 0.103(6) -0.006(6) 0.013(5) -0.003(5) 
C35' 0.039(2) 0.026(2) 0.088(4) -0.012(3) 0.025(2) -0.0039(15) 
C36' 0.053(3) 0.048(2) 0.097(4) -0.025(3) 0.040(3) -0.013(2) 
C37' 0.059(3) 0.052(3) 0.119(4) -0.026(3) 0.047(3) -0.009(2) 
C38' 0.050(2) 0.042(2) 0.133(5) -0.023(3) 0.036(3) -0.007(2) 
C39' 0.043(2) 0.043(2) 0.118(4) -0.013(3) 0.018(3) -0.006(2) 
C40' 0.038(2) 0.033(2) 0.094(4) -0.004(2) 0.012(2) -0.0004(17) 
C41 0.0512(19) 0.0348(16) 0.0462(18) 0.0012(13) 0.0106(15) 0.0075(14) 
C42 0.116(4) 0.043(2) 0.067(3) 0.0114(18) 0.048(3) 0.016(2) 
C43 0.175(6) 0.044(2) 0.075(3) 0.017(2) 0.057(4) 0.026(3) 
C44 0.137(5) 0.060(3) 0.064(3) 0.018(2) 0.015(3) 0.043(3) 
C45 0.091(4) 0.098(4) 0.081(3) 0.004(3) 0.021(3) 0.058(3) 
C46 0.060(2) 0.074(3) 0.061(2) 0.018(2) 0.0170(19) 0.027(2) 
C47 0.0415(17) 0.0355(15) 0.0409(16) -0.0031(13) -0.0029(13) 0.0031(13) 
C48 0.088(3) 0.0415(19) 0.051(2) -0.0052(16) -0.008(2) 0.0049(19) 
C49 0.129(4) 0.056(2) 0.048(2) -0.0157(19) -0.016(2) 0.018(3) 
C50 0.104(4) 0.085(3) 0.0350(19) -0.004(2) -0.007(2) 0.035(3) 
C51 0.073(3) 0.060(2) 0.0415(19) 0.0071(17) 0.0021(18) 0.0136(19) 
C52 0.0442(18) 0.0432(17) 0.0390(16) -0.0010(13) -0.0006(14) 0.0073(14) 
  
_geom_special_details 
; 
 All esds (except the esd in the dihedral angle between two l.s. planes) 
 are estimated using the full covariance matrix.  The cell esds are taken 
 into account individually in the estimation of esds in distances, angles 
 and torsion angles; correlations between esds in cell parameters are only 
 used when they are defined by crystal symmetry.  An approximate (isotropic) 
 treatment of cell esds is used for estimating esds involving l.s. planes. 
; 
  
loop_ 
 _geom_bond_atom_site_label_1 
 _geom_bond_atom_site_label_2 
 _geom_bond_distance 
 _geom_bond_site_symmetry_2 
 _geom_bond_publ_flag 
Pt1 P2 2.2652(8) . ? 
Pt1 P1 2.2855(7) . ? 
Pt1 Al1 2.5610(8) . ? 
P1 C1 1.805(3) . ? 
P1 C9 1.844(3) . ? 
P1 C18 1.853(3) . ? 
Al1 C31 2.036(3) . ? 
Al1 C27 2.038(3) . ? 
Al1 C1 2.057(3) . ? 
C1 C2 1.348(4) . ? 
C2 C3 1.472(4) . ? 
C2 H2 0.9500 . ? 
C3 C4 1.387(4) . ? 
C3 C8 1.396(4) . ? 
C4 C5 1.391(5) . ? 
C4 H4 0.9500 . ? 
C5 C6 1.374(5) . ? 
C5 H5 0.9500 . ? 
C6 C7 1.370(5) . ? 
C6 H6 0.9500 . ? 
C7 C8 1.378(4) . ? 
C7 H7 0.9500 . ? 
C8 H8 0.9500 . ? 
C9 C14 1.410(4) . ? 
C9 C10 1.415(4) . ? 
C10 C11 1.388(4) . ? 
C10 C15 1.498(4) . ? 
C11 C12 1.381(5) . ? 
C11 H11 0.9500 . ? 
C12 C13 1.380(5) . ? 
C12 C16 1.514(4) . ? 
C13 C14 1.389(4) . ? 
C13 H13 0.9500 . ? 
C14 C17 1.511(4) . ? 
C15 H15A 0.9800 . ? 
C15 H15B 0.9800 . ? 
C15 H15C 0.9800 . ? 
C16 H16A 0.9800 . ? 
C16 H16B 0.9800 . ? 
C16 H16C 0.9800 . ? 
C17 H17A 0.9800 . ? 
C17 H17B 0.9800 . ? 
C17 H17C 0.9800 . ? 
C18 C19 1.409(4) . ? 
C18 C23 1.413(4) . ? 
C19 C20 1.407(4) . ? 
C19 C24 1.502(5) . ? 
C20 C21 1.369(6) . ? 
C20 H20 0.9500 . ? 
C21 C22 1.373(6) . ? 
C21 C25 1.524(5) . ? 
C22 C23 1.405(4) . ? 
C22 H22 0.9500 . ? 
C23 C26 1.506(5) . ? 
C24 H24A 0.9800 . ? 
C24 H24B 0.9800 . ? 
C24 H24C 0.9800 . ? 
C25 H25A 0.9800 . ? 
C25 H25B 0.9800 . ? 
C25 H25C 0.9800 . ? 
C26 H26A 0.9800 . ? 
C26 H26B 0.9800 . ? 
C26 H26C 0.9800 . ? 
C27 C28 1.534(5) . ? 
C27 C29 1.534(4) . ? 
C27 C30 1.539(5) . ? 
C28 H28A 0.9800 . ? 
C28 H28B 0.9800 . ? 
C28 H28C 0.9800 . ? 
C29 H29A 0.9800 . ? 
C29 H29B 0.9800 . ? 
C29 H29C 0.9800 . ? 
C30 H30A 0.9800 . ? 
C30 H30B 0.9800 . ? 
C30 H30C 0.9800 . ? 
C31 C32 1.527(5) . ? 
C31 C34 1.534(5) . ? 
C31 C33 1.534(5) . ? 
C32 H32A 0.9800 . ? 
C32 H32B 0.9800 . ? 
C32 H32C 0.9800 . ? 
C33 H33A 0.9800 . ? 
C33 H33B 0.9800 . ? 
C33 H33C 0.9800 . ? 
C34 H34A 0.9800 . ? 
C34 H34B 0.9800 . ? 
C34 H34C 0.9800 . ? 
P2 C47 1.823(3) . ? 
P2 C41 1.830(3) . ? 
P2 C35 1.832(14) . ? 
P2 C35' 1.847(4) . ? 
C35 C36 1.366(17) . ? 
C35 C40 1.389(16) . ? 
C36 C37 1.418(16) . ? 
C36 H36 0.9500 . ? 
C37 C38 1.377(19) . ? 
C37 H37 0.9500 . ? 
C38 C39 1.357(19) . ? 
C38 H38 0.9500 . ? 
C39 C40 1.393(16) . ? 
C39 H39 0.9500 . ? 
C40 H40 0.9500 . ? 
C35' C36' 1.383(7) . ? 
C35' C40' 1.388(7) . ? 
C36' C37' 1.411(6) . ? 
C36' H36' 0.9500 . ? 
C37' C38' 1.389(9) . ? 
C37' H37' 0.9500 . ? 
C38' C39' 1.358(9) . ? 
C38' H38' 0.9500 . ? 
C39' C40' 1.391(7) . ? 
C39' H39' 0.9500 . ? 
C40' H40' 0.9500 . ? 
C41 C46 1.353(5) . ? 
C41 C42 1.381(5) . ? 
C42 C43 1.376(6) . ? 
C42 H42 0.9500 . ? 
C43 C44 1.327(7) . ? 
C43 H43 0.9500 . ? 
C44 C45 1.350(7) . ? 
C44 H44 0.9500 . ? 
C45 C46 1.397(6) . ? 
C45 H45 0.9500 . ? 
C46 H46 0.9500 . ? 
C47 C52 1.380(4) . ? 
C47 C48 1.389(5) . ? 
C48 C49 1.381(6) . ? 
C48 H48 0.9500 . ? 
C49 C50 1.384(7) . ? 
C49 H49 0.9500 . ? 
C50 C51 1.363(6) . ? 
C50 H50 0.9500 . ? 
C51 C52 1.379(5) . ? 
C51 H51 0.9500 . ? 
C52 H52 0.9500 . ? 
  
loop_ 
 _geom_angle_atom_site_label_1 
 _geom_angle_atom_site_label_2 
 _geom_angle_atom_site_label_3 
 _geom_angle 
 _geom_angle_site_symmetry_1 
 _geom_angle_site_symmetry_3 
 _geom_angle_publ_flag 
P2 Pt1 P1 168.81(3) . . ? 
P2 Pt1 Al1 112.21(3) . . ? 
P1 Pt1 Al1 74.02(3) . . ? 
C1 P1 C9 110.62(12) . . ? 
C1 P1 C18 116.02(13) . . ? 
C9 P1 C18 105.77(12) . . ? 
C1 P1 Pt1 100.75(9) . . ? 
C9 P1 Pt1 124.50(9) . . ? 
C18 P1 Pt1 99.40(9) . . ? 
C31 Al1 C27 117.80(13) . . ? 
C31 Al1 C1 117.81(12) . . ? 
C27 Al1 C1 110.98(13) . . ? 
C31 Al1 Pt1 111.38(10) . . ? 
C27 Al1 Pt1 108.21(9) . . ? 
C1 Al1 Pt1 85.81(8) . . ? 
C2 C1 P1 118.8(2) . . ? 
C2 C1 Al1 133.7(2) . . ? 
P1 C1 Al1 98.27(13) . . ? 
C1 C2 C3 125.3(3) . . ? 
C1 C2 H2 117.4 . . ? 
C3 C2 H2 117.4 . . ? 
C4 C3 C8 117.8(3) . . ? 
C4 C3 C2 121.4(3) . . ? 
C8 C3 C2 120.8(3) . . ? 
C3 C4 C5 120.2(3) . . ? 
C3 C4 H4 119.9 . . ? 
C5 C4 H4 119.9 . . ? 
C6 C5 C4 121.0(3) . . ? 
C6 C5 H5 119.5 . . ? 
C4 C5 H5 119.5 . . ? 
C7 C6 C5 119.2(3) . . ? 
C7 C6 H6 120.4 . . ? 
C5 C6 H6 120.4 . . ? 
C6 C7 C8 120.5(3) . . ? 
C6 C7 H7 119.7 . . ? 
C8 C7 H7 119.7 . . ? 
C7 C8 C3 121.2(3) . . ? 
C7 C8 H8 119.4 . . ? 
C3 C8 H8 119.4 . . ? 
C14 C9 C10 118.7(2) . . ? 
C14 C9 P1 121.0(2) . . ? 
C10 C9 P1 120.3(2) . . ? 
C11 C10 C9 118.9(3) . . ? 
C11 C10 C15 117.0(3) . . ? 
C9 C10 C15 124.1(3) . . ? 
C12 C11 C10 122.9(3) . . ? 
C12 C11 H11 118.5 . . ? 
C10 C11 H11 118.5 . . ? 
C13 C12 C11 117.4(3) . . ? 
C13 C12 C16 121.5(3) . . ? 
C11 C12 C16 121.1(3) . . ? 
C12 C13 C14 122.5(3) . . ? 
C12 C13 H13 118.7 . . ? 
C14 C13 H13 118.7 . . ? 
C13 C14 C9 119.4(3) . . ? 
C13 C14 C17 116.7(3) . . ? 
C9 C14 C17 123.9(2) . . ? 
C10 C15 H15A 109.5 . . ? 
C10 C15 H15B 109.5 . . ? 
H15A C15 H15B 109.5 . . ? 
C10 C15 H15C 109.5 . . ? 
H15A C15 H15C 109.5 . . ? 
H15B C15 H15C 109.5 . . ? 
C12 C16 H16A 109.5 . . ? 
C12 C16 H16B 109.5 . . ? 
H16A C16 H16B 109.5 . . ? 
C12 C16 H16C 109.5 . . ? 
H16A C16 H16C 109.5 . . ? 
H16B C16 H16C 109.5 . . ? 
C14 C17 H17A 109.5 . . ? 
C14 C17 H17B 109.5 . . ? 
H17A C17 H17B 109.5 . . ? 
C14 C17 H17C 109.5 . . ? 
H17A C17 H17C 109.5 . . ? 
H17B C17 H17C 109.5 . . ? 
C19 C18 C23 119.4(3) . . ? 
C19 C18 P1 125.3(2) . . ? 
C23 C18 P1 114.8(2) . . ? 
C20 C19 C18 118.1(3) . . ? 
C20 C19 C24 116.8(3) . . ? 
C18 C19 C24 125.0(3) . . ? 
C21 C20 C19 123.2(4) . . ? 
C21 C20 H20 118.4 . . ? 
C19 C20 H20 118.4 . . ? 
C20 C21 C22 117.7(3) . . ? 
C20 C21 C25 120.8(4) . . ? 
C22 C21 C25 121.5(4) . . ? 
C21 C22 C23 122.6(3) . . ? 
C21 C22 H22 118.7 . . ? 
C23 C22 H22 118.7 . . ? 
C22 C23 C18 118.6(3) . . ? 
C22 C23 C26 117.7(3) . . ? 
C18 C23 C26 123.6(3) . . ? 
C19 C24 H24A 109.5 . . ? 
C19 C24 H24B 109.5 . . ? 
H24A C24 H24B 109.5 . . ? 
C19 C24 H24C 109.5 . . ? 
H24A C24 H24C 109.5 . . ? 
H24B C24 H24C 109.5 . . ? 
C21 C25 H25A 109.5 . . ? 
C21 C25 H25B 109.5 . . ? 
H25A C25 H25B 109.5 . . ? 
C21 C25 H25C 109.5 . . ? 
H25A C25 H25C 109.5 . . ? 
H25B C25 H25C 109.5 . . ? 
C23 C26 H26A 109.5 . . ? 
C23 C26 H26B 109.5 . . ? 
H26A C26 H26B 109.5 . . ? 
C23 C26 H26C 109.5 . . ? 
H26A C26 H26C 109.5 . . ? 
H26B C26 H26C 109.5 . . ? 
C28 C27 C29 108.3(3) . . ? 
C28 C27 C30 107.8(3) . . ? 
C29 C27 C30 107.6(3) . . ? 
C28 C27 Al1 112.3(2) . . ? 
C29 C27 Al1 110.1(2) . . ? 
C30 C27 Al1 110.5(2) . . ? 
C27 C28 H28A 109.5 . . ? 
C27 C28 H28B 109.5 . . ? 
H28A C28 H28B 109.5 . . ? 
C27 C28 H28C 109.5 . . ? 
H28A C28 H28C 109.5 . . ? 
H28B C28 H28C 109.5 . . ? 
C27 C29 H29A 109.5 . . ? 
C27 C29 H29B 109.5 . . ? 
H29A C29 H29B 109.5 . . ? 
C27 C29 H29C 109.5 . . ? 
H29A C29 H29C 109.5 . . ? 
H29B C29 H29C 109.5 . . ? 
C27 C30 H30A 109.5 . . ? 
C27 C30 H30B 109.5 . . ? 
H30A C30 H30B 109.5 . . ? 
C27 C30 H30C 109.5 . . ? 
H30A C30 H30C 109.5 . . ? 
H30B C30 H30C 109.5 . . ? 
C32 C31 C34 107.7(3) . . ? 
C32 C31 C33 106.2(3) . . ? 
C34 C31 C33 108.2(3) . . ? 
C32 C31 Al1 110.4(2) . . ? 
C34 C31 Al1 111.5(2) . . ? 
C33 C31 Al1 112.6(2) . . ? 
C31 C32 H32A 109.5 . . ? 
C31 C32 H32B 109.5 . . ? 
H32A C32 H32B 109.5 . . ? 
C31 C32 H32C 109.5 . . ? 
H32A C32 H32C 109.5 . . ? 
H32B C32 H32C 109.5 . . ? 
C31 C33 H33A 109.5 . . ? 
C31 C33 H33B 109.5 . . ? 
H33A C33 H33B 109.5 . . ? 
C31 C33 H33C 109.5 . . ? 
H33A C33 H33C 109.5 . . ? 
H33B C33 H33C 109.5 . . ? 
C31 C34 H34A 109.5 . . ? 
C31 C34 H34B 109.5 . . ? 
H34A C34 H34B 109.5 . . ? 
C31 C34 H34C 109.5 . . ? 
H34A C34 H34C 109.5 . . ? 
H34B C34 H34C 109.5 . . ? 
C47 P2 C41 103.08(15) . . ? 
C47 P2 C35 94.6(8) . . ? 
C41 P2 C35 103.8(13) . . ? 
C47 P2 C35' 107.5(2) . . ? 
C41 P2 C35' 101.8(3) . . ? 
C35 P2 C35' 13.0(8) . . ? 
C47 P2 Pt1 117.15(10) . . ? 
C41 P2 Pt1 122.05(11) . . ? 
C35 P2 Pt1 112.1(10) . . ? 
C35' P2 Pt1 103.5(2) . . ? 
C36 C35 C40 122.1(14) . . ? 
C36 C35 P2 112.9(13) . . ? 
C40 C35 P2 124.6(14) . . ? 
C35 C36 C37 119.8(17) . . ? 
C35 C36 H36 120.1 . . ? 
C37 C36 H36 120.1 . . ? 
C38 C37 C36 116.8(17) . . ? 
C38 C37 H37 121.6 . . ? 
C36 C37 H37 121.6 . . ? 
C39 C38 C37 123.2(18) . . ? 
C39 C38 H38 118.4 . . ? 
C37 C38 H38 118.4 . . ? 
C38 C39 C40 120.1(18) . . ? 
C38 C39 H39 120.0 . . ? 
C40 C39 H39 120.0 . . ? 
C35 C40 C39 117.7(17) . . ? 
C35 C40 H40 121.1 . . ? 
C39 C40 H40 121.1 . . ? 
C36' C35' C40' 119.7(4) . . ? 
C36' C35' P2 117.7(4) . . ? 
C40' C35' P2 122.5(4) . . ? 
C35' C36' C37' 120.0(5) . . ? 
C35' C36' H36' 120.0 . . ? 
C37' C36' H36' 120.0 . . ? 
C38' C37' C36' 118.5(6) . . ? 
C38' C37' H37' 120.8 . . ? 
C36' C37' H37' 120.8 . . ? 
C39' C38' C37' 121.7(5) . . ? 
C39' C38' H38' 119.1 . . ? 
C37' C38' H38' 119.1 . . ? 
C38' C39' C40' 119.6(6) . . ? 
C38' C39' H39' 120.2 . . ? 
C40' C39' H39' 120.2 . . ? 
C35' C40' C39' 120.4(6) . . ? 
C35' C40' H40' 119.8 . . ? 
C39' C40' H40' 119.8 . . ? 
C46 C41 C42 117.6(3) . . ? 
C46 C41 P2 121.4(3) . . ? 
C42 C41 P2 121.0(3) . . ? 
C43 C42 C41 121.0(4) . . ? 
C43 C42 H42 119.5 . . ? 
C41 C42 H42 119.5 . . ? 
C44 C43 C42 120.6(4) . . ? 
C44 C43 H43 119.7 . . ? 
C42 C43 H43 119.7 . . ? 
C43 C44 C45 120.1(4) . . ? 
C43 C44 H44 120.0 . . ? 
C45 C44 H44 120.0 . . ? 
C44 C45 C46 120.2(4) . . ? 
C44 C45 H45 119.9 . . ? 
C46 C45 H45 119.9 . . ? 
C41 C46 C45 120.6(4) . . ? 
C41 C46 H46 119.7 . . ? 
C45 C46 H46 119.7 . . ? 
C52 C47 C48 118.3(3) . . ? 
C52 C47 P2 119.3(2) . . ? 
C48 C47 P2 122.4(3) . . ? 
C49 C48 C47 121.0(4) . . ? 
C49 C48 H48 119.5 . . ? 
C47 C48 H48 119.5 . . ? 
C48 C49 C50 119.0(4) . . ? 
C48 C49 H49 120.5 . . ? 
C50 C49 H49 120.5 . . ? 
C51 C50 C49 120.8(4) . . ? 
C51 C50 H50 119.6 . . ? 
C49 C50 H50 119.6 . . ? 
C50 C51 C52 119.6(4) . . ? 
C50 C51 H51 120.2 . . ? 
C52 C51 H51 120.2 . . ? 
C51 C52 C47 121.2(3) . . ? 
C51 C52 H52 119.4 . . ? 
C47 C52 H52 119.4 . . ? 
  
_diffrn_measured_fraction_theta_max    0.993 
_diffrn_reflns_theta_full              30.51 
_diffrn_measured_fraction_theta_full   0.993 
_refine_diff_density_max    0.828 
_refine_diff_density_min   -0.475 
_refine_diff_density_rms    0.092 

#===END

data_3
_audit_creation_date              2016-01-12
_audit_creation_method
;
Olex2 1.2
(compiled 2015.01.26 svn.r3150 for OlexSys, GUI svn.r4998)
;
_shelxl_version_number            2014/6
_publ_contact_author_address      ?
_publ_contact_author_email        ?
_publ_contact_author_name         ''
_publ_contact_author_phone        ?
_publ_section_references
;
Burla, M.C., Caliandro, R., Camalli, M., Carrozzini, B., Cascarano, G.L.,
 De Caro, L., Giacovazzo, C., Polidori, G., Siliqi, D., Spagna, R.
 (2007). J. Appl. Cryst. 40, 609-613.

Dolomanov, O.V., Bourhis, L.J., Gildea, R.J, Howard, J.A.K. & Puschmann, H.
 (2009), J. Appl. Cryst. 42, 339-341.

Sheldrick, G.M. (2008). Acta Cryst. A64, 112-122.
;
_chemical_name_common             ?
_chemical_name_systematic         ?
_chemical_formula_moiety          '2(C53 H61 Al O2 P2 Pt), 0.5(C4 H8 O)'
_chemical_formula_sum             'C108 H126 Al2 O4.50 P4 Pt2'
_chemical_formula_weight          2064.10
_chemical_melting_point           ?
loop_
  _atom_type_symbol
  _atom_type_description
  _atom_type_scat_dispersion_real
  _atom_type_scat_dispersion_imag
  _atom_type_scat_source
 'C' 'C' 0.0033 0.0016 'International Tables Vol C Tables 4.2.6.8 and 6.1.1.4'
 'H' 'H' 0.0000 0.0000 'International Tables Vol C Tables 4.2.6.8 and 6.1.1.4'
 'Al' 'Al' 0.0645 0.0514 'International Tables Vol C Tables 4.2.6.8 and 6.1.1.4'
 'O' 'O' 0.0106 0.0060 'International Tables Vol C Tables 4.2.6.8 and 6.1.1.4'
 'P' 'P' 0.1023 0.0942 'International Tables Vol C Tables 4.2.6.8 and 6.1.1.4'
 'Pt' 'Pt' -1.7033 8.3905
 'International Tables Vol C Tables 4.2.6.8 and 6.1.1.4'

_shelx_space_group_comment
;
The symmetry employed for this shelxl refinement is uniquely defined
by the following loop, which should always be used as a source of
symmetry information in preference to the above space-group names.
They are only intended as comments.
;
_space_group_crystal_system       'triclinic'
_space_group_IT_number            2
_space_group_name_H-M_alt         'P -1'
_space_group_name_Hall            '-P 1'
loop_
  _space_group_symop_operation_xyz
 'x, y, z'
 '-x, -y, -z'

_cell_length_a                    12.5062(9)
_cell_length_b                    18.9753(13)
_cell_length_c                    21.5190(14)
_cell_angle_alpha                 97.690(2)
_cell_angle_beta                  92.244(2)
_cell_angle_gamma                 108.259(2)
_cell_volume                      4788.0(6)
_cell_formula_units_Z             2
_cell_measurement_reflns_used     9890
_cell_measurement_temperature     193(2)
_cell_measurement_theta_max       22.72
_cell_measurement_theta_min       3.22
_shelx_estimated_absorpt_T_max    0.888
_shelx_estimated_absorpt_T_min    0.566
_exptl_absorpt_coefficient_mu     3.056
_exptl_absorpt_correction_T_max   0.7456
_exptl_absorpt_correction_T_min   0.6484
_exptl_absorpt_correction_type    multi-scan
_exptl_absorpt_process_details
'SADABS-2014/3 (Bruker,2014/3) was used for absorption correction. wR2(int) was 0.1088 before and 0.0641 after correction. The Ratio of minimum to maximum transmission is 0.8696. The \l/2 correction factor is 0.00150.'
_exptl_absorpt_special_details    ?
_exptl_crystal_colour             colourless
_exptl_crystal_colour_primary     colourless
_exptl_crystal_density_diffrn     1.432
_exptl_crystal_density_meas       ?
_exptl_crystal_density_method     ?
_exptl_crystal_description        plate
_exptl_crystal_F_000              2104
_exptl_crystal_size_max           0.21
_exptl_crystal_size_mid           0.05
_exptl_crystal_size_min           0.04
_exptl_transmission_factor_max    ?
_exptl_transmission_factor_min    ?
_diffrn_reflns_av_R_equivalents   0.0769
_diffrn_reflns_av_unetI/netI      0.0573
_diffrn_reflns_Laue_measured_fraction_full 0.934
_diffrn_reflns_Laue_measured_fraction_max 0.991
_diffrn_reflns_limit_h_max        14
_diffrn_reflns_limit_h_min        -14
_diffrn_reflns_limit_k_max        22
_diffrn_reflns_limit_k_min        -22
_diffrn_reflns_limit_l_max        25
_diffrn_reflns_limit_l_min        -25
_diffrn_reflns_number             92035
_diffrn_reflns_point_group_measured_fraction_full 0.934
_diffrn_reflns_point_group_measured_fraction_max 0.991
_diffrn_reflns_theta_full         25.242
_diffrn_reflns_theta_max          24.713
_diffrn_reflns_theta_min          5.101
_diffrn_ambient_temperature       193.02
_diffrn_detector_area_resol_mean  ?
_diffrn_measured_fraction_theta_full 0.934
_diffrn_measured_fraction_theta_max 0.991
_diffrn_measurement_device_type   'Bruker APEX-II CCD'
_diffrn_measurement_method        '\f and \w scans'
_diffrn_radiation_type            MoK\a
_diffrn_radiation_wavelength      0.71073
_diffrn_source                    ?
_diffrn_standards_number          0
_reflns_Friedel_coverage          0.000
_reflns_Friedel_fraction_full     .
_reflns_Friedel_fraction_max      .
_reflns_number_gt                 12610
_reflns_number_total              16171
_reflns_special_details
;
 Reflections were merged by SHELXL according to the crystal
 class for the calculation of statistics and refinement.
 
 _reflns_Friedel_fraction is defined as the number of unique
 Friedel pairs measured divided by the number that would be
 possible theoretically, ignoring centric projections and
 systematic absences.
;
_reflns_threshold_expression      'I > 2\s(I)'
_computing_cell_refinement        'SAINT v8.34A (Bruker, 2013)'
_computing_data_collection        ?
_computing_data_reduction         'SAINT v8.34A (Bruker, 2013)'
_computing_molecular_graphics     'Olex2 (Dolomanov et al., 2009)'
_computing_publication_material   'Olex2 (Dolomanov et al., 2009)'
_computing_structure_refinement   'ShelXL (Sheldrick, 2008)'
_computing_structure_solution     'SIR2004 (Burla et al., 2007)'
_refine_diff_density_max          1.554
_refine_diff_density_min          -2.291
_refine_diff_density_rms          0.128
_refine_ls_extinction_coef        .
_refine_ls_extinction_method      none
_refine_ls_goodness_of_fit_ref    1.094
_refine_ls_hydrogen_treatment     constr
_refine_ls_matrix_type            full
_refine_ls_number_parameters      1194
_refine_ls_number_reflns          16171
_refine_ls_number_restraints      152
_refine_ls_R_factor_all           0.0700
_refine_ls_R_factor_gt            0.0478
_refine_ls_restrained_S_all       1.090
_refine_ls_shift/su_max           0.001
_refine_ls_shift/su_mean          0.000
_refine_ls_structure_factor_coef  Fsqd
_refine_ls_weighting_details
'w=1/[\s^2^(Fo^2^)+(0.0291P)^2^+34.4305P] where P=(Fo^2^+2Fc^2^)/3'
_refine_ls_weighting_scheme       calc
_refine_ls_wR_factor_gt           0.1076
_refine_ls_wR_factor_ref          0.1163
_refine_special_details           ?
_olex2_refinement_description
;
1. Fixed Uiso
 At 1.2 times of:
  All C(H) groups, All C(H,H) groups
 At 1.5 times of:
  All C(H,H,H) groups
2. Rigid bond restraints
 C108, C107, O5, C110, C109
 with sigma for 1-2 distances of 0.01 and sigma for 1-3 distances of 0.01
 C78, C79, C80, C78', C79', C80'
 with sigma for 1-2 distances of 0.01 and sigma for 1-3 distances of 0.01
 C74, C75, C76, C74', C75', C76'
 with sigma for 1-2 distances of 0.01 and sigma for 1-3 distances of 0.01
3. Uiso/Uaniso restraints and constraints
C108 \\sim C107 \\sim O5 \\sim C110 \\sim C109: within 1.7A with sigma of 0.04
and sigma for terminal atoms of 0.08
C73 \\sim C74 \\sim C75 \\sim C76 \\sim C74' \\sim C75' \\sim C76': within 1.7A
with sigma of 0.005 and sigma for terminal atoms of 0.01
C77 \\sim C78 \\sim C79 \\sim C80 \\sim C78' \\sim C79' \\sim C80': within 1.7A
with sigma of 0.005 and sigma for terminal atoms of 0.01
4. Same fragment restrains
{C109, C110, O5, C107, C108} sigma for 1-2: 0.02, 1-3: 0.04
as
{C108, C107, O5, C110, C109}
5. Others
 Sof(C74')=Sof(H74D)=Sof(H74E)=Sof(H74F)=Sof(C75')=Sof(H75D)=Sof(H75E)=
 Sof(H75F)=Sof(C76')=Sof(H76D)=Sof(H76E)=Sof(H76F)=1-FVAR(1)
 Sof(C74)=Sof(H74A)=Sof(H74B)=Sof(H74C)=Sof(C75)=Sof(H75A)=Sof(H75B)=Sof(H75C)=
 Sof(C76)=Sof(H76A)=Sof(H76B)=Sof(H76C)=FVAR(1)
 Sof(C78')=Sof(H78D)=Sof(H78E)=Sof(H78F)=Sof(C79')=Sof(H79D)=Sof(H79E)=
 Sof(H79F)=Sof(C80')=Sof(H80D)=Sof(H80E)=Sof(H80F)=1-FVAR(2)
 Sof(C78)=Sof(H78A)=Sof(H78B)=Sof(H78C)=Sof(C79)=Sof(H79A)=Sof(H79B)=Sof(H79C)=
 Sof(C80)=Sof(H80A)=Sof(H80B)=Sof(H80C)=FVAR(2)
 Fixed Sof: C108(0.5) H10A(0.5) H10B(0.5) C107(0.5) H10C(0.5) H10D(0.5)
 O5(0.5) C110(0.5) H11A(0.5) H11B(0.5) C109(0.5) H10E(0.5) H10F(0.5)
6.a Secondary CH2 refined with riding coordinates:
 C108(H10A,H10B), C107(H10C,H10D), C110(H11A,H11B), C109(H10E,H10F)
6.b Aromatic/amide H refined with riding coordinates:
 C100(H100), C106(H106), C105(H105), C104(H104), C103(H103), C102(H102),
 C86(H86), C84(H84), C95(H95), C93(H93), C71(H71), C70(H70), C69(H69), C68(H68),
  C67(H67), C61(H61), C62(H62), C63(H63), C64(H64), C65(H65), C59(H59),
 C58(H58), C57(H57), C56(H56), C55(H55), C52(H52), C47(H47), C49(H49), C53(H53),
  C51(H51), C50(H50), C42(H42), C40(H40), C31(H31), C33(H33), C14(H14),
 C15(H15), C16(H16), C17(H17), C18(H18), C6(H6), C5(H5), C4(H4), C3(H3), C2(H2),
  C8(H8), C9(H9), C10(H10), C11(H11), C12(H12)
6.c Idealised Me refined as rotating group:
 C90(H90A,H90B,H90C), C89(H89A,H89B,H89C), C88(H88A,H88B,H88C), C99(H99A,H99B,
 H99C), C98(H98A,H98B,H98C), C97(H97A,H97B,H97C), C78(H78A,H78B,H78C), C79(H79A,
 H79B,H79C), C80(H80A,H80B,H80C), C78'(H78D,H78E,H78F), C79'(H79D,H79E,H79F),
 C80'(H80D,H80E,H80F), C74(H74A,H74B,H74C), C75(H75A,H75B,H75C), C76(H76A,H76B,
 H76C), C74'(H74D,H74E,H74F), C75'(H75D,H75E,H75F), C76'(H76D,H76E,H76F),
 C46(H46A,H46B,H46C), C45(H45A,H45B,H45C), C44(H44A,H44B,H44C), C35(H35A,H35B,
 H35C), C36(H36A,H36B,H36C), C37(H37A,H37B,H37C), C25(H25A,H25B,H25C), C26(H26A,
 H26B,H26C), C27(H27A,H27B,H27C), C21(H21A,H21B,H21C), C23(H23A,H23B,H23C),
 C22(H22A,H22B,H22C)
;
_atom_sites_solution_hydrogens    geom
_atom_sites_solution_primary      direct
_atom_sites_solution_secondary    ?
loop_
  _atom_site_label
  _atom_site_type_symbol
  _atom_site_fract_x
  _atom_site_fract_y
  _atom_site_fract_z
  _atom_site_U_iso_or_equiv
  _atom_site_adp_type
  _atom_site_occupancy
  _atom_site_site_symmetry_order
  _atom_site_calc_flag
  _atom_site_refinement_flags_posn
  _atom_site_refinement_flags_adp
  _atom_site_refinement_flags_occupancy
  _atom_site_disorder_assembly
  _atom_site_disorder_group
 Pt2 Pt 0.23508(2) 0.22891(2) 0.13100(2) 0.03506(10) Uani 1 1 d . . . . .
 P3 P 0.42029(16) 0.22726(11) 0.13804(9) 0.0274(4) Uani 1 1 d . . . . .
 P4 P 0.04758(17) 0.22351(13) 0.11991(11) 0.0343(5) Uani 1 1 d . . . . .
 Al2 Al 0.4286(2) 0.35789(15) 0.25734(12) 0.0370(6) Uani 1 1 d . . . . .
 O3 O 0.2533(5) 0.3703(4) 0.1007(3) 0.063(2) Uani 1 1 d . . . . .
 O4 O 0.3579(5) 0.3744(3) 0.1871(3) 0.0447(15) Uani 1 1 d . . . . .
 C81 C 0.4807(6) 0.2699(4) 0.2174(3) 0.0293(18) Uani 1 1 d . . . . .
 C100 C 0.5192(6) 0.2247(5) 0.2500(4) 0.0349(19) Uani 1 1 d . . . . .
 H100 H 0.5127 0.1762 0.2285 0.042 Uiso 1 1 calc R . . . .
 C101 C 0.5701(7) 0.2441(5) 0.3157(4) 0.036(2) Uani 1 1 d . . . . .
 C106 C 0.6344(8) 0.3154(5) 0.3412(4) 0.046(2) Uani 1 1 d . . . . .
 H106 H 0.6439 0.3547 0.3166 0.055 Uiso 1 1 calc R . . . .
 C105 C 0.6864(9) 0.3322(6) 0.4023(5) 0.059(3) Uani 1 1 d . . . . .
 H105 H 0.7322 0.3820 0.4189 0.071 Uiso 1 1 calc R . . . .
 C104 C 0.6698(9) 0.2748(7) 0.4383(5) 0.059(3) Uani 1 1 d . . . . .
 H104 H 0.7039 0.2849 0.4802 0.071 Uiso 1 1 calc R . . . .
 C103 C 0.6048(10) 0.2043(7) 0.4132(5) 0.067(3) Uani 1 1 d . . . . .
 H103 H 0.5926 0.1653 0.4382 0.080 Uiso 1 1 calc R . . . .
 C102 C 0.5561(9) 0.1878(6) 0.3526(4) 0.054(3) Uani 1 1 d . . . . .
 H102 H 0.5125 0.1376 0.3358 0.064 Uiso 1 1 calc R . . . .
 C82 C 0.5028(7) 0.2723(4) 0.0766(4) 0.0323(18) Uani 1 1 d . . . . .
 C87 C 0.6059(7) 0.3303(5) 0.0877(4) 0.038(2) Uani 1 1 d . . . . .
 C86 C 0.6595(7) 0.3571(5) 0.0354(4) 0.044(2) Uani 1 1 d . . . . .
 H86 H 0.7286 0.3975 0.0429 0.053 Uiso 1 1 calc R . . . .
 C85 C 0.6182(7) 0.3287(5) -0.0257(4) 0.040(2) Uani 1 1 d . . . . .
 C84 C 0.5169(7) 0.2700(5) -0.0362(4) 0.038(2) Uani 1 1 d . . . . .
 H84 H 0.4869 0.2487 -0.0782 0.046 Uiso 1 1 calc R . . . .
 C83 C 0.4583(7) 0.2416(5) 0.0134(4) 0.0353(19) Uani 1 1 d . . . . .
 C90 C 0.6717(8) 0.3628(6) 0.1515(4) 0.066(3) Uani 1 1 d . . . . .
 H90A H 0.6202 0.3721 0.1824 0.099 Uiso 1 1 calc GR . . . .
 H90B H 0.7307 0.4102 0.1483 0.099 Uiso 1 1 calc GR . . . .
 H90C H 0.7067 0.3272 0.1649 0.099 Uiso 1 1 calc GR . . . .
 C89 C 0.6796(8) 0.3608(7) -0.0809(5) 0.064(3) Uani 1 1 d . . . . .
 H89A H 0.7193 0.4146 -0.0684 0.096 Uiso 1 1 calc GR . . . .
 H89B H 0.6245 0.3532 -0.1169 0.096 Uiso 1 1 calc GR . . . .
 H89C H 0.7344 0.3351 -0.0927 0.096 Uiso 1 1 calc GR . . . .
 C88 C 0.3509(7) 0.1787(5) -0.0036(4) 0.046(2) Uani 1 1 d . . . . .
 H88A H 0.3611 0.1322 0.0065 0.070 Uiso 1 1 calc GR . . . .
 H88B H 0.3295 0.1728 -0.0487 0.070 Uiso 1 1 calc GR . . . .
 H88C H 0.2913 0.1895 0.0203 0.070 Uiso 1 1 calc GR . . . .
 C91 C 0.4218(7) 0.1300(5) 0.1223(4) 0.0350(19) Uani 1 1 d . . . . .
 C96 C 0.3203(7) 0.0696(5) 0.1201(4) 0.039(2) Uani 1 1 d . . . . .
 C95 C 0.3186(8) -0.0043(5) 0.1057(4) 0.045(2) Uani 1 1 d . . . . .
 H95 H 0.2494 -0.0439 0.1052 0.054 Uiso 1 1 calc R . . . .
 C94 C 0.4150(8) -0.0216(5) 0.0921(4) 0.048(2) Uani 1 1 d . . . . .
 C93 C 0.5153(8) 0.0367(5) 0.0952(4) 0.044(2) Uani 1 1 d . . . . .
 H93 H 0.5826 0.0253 0.0870 0.052 Uiso 1 1 calc R . . . .
 C92 C 0.5212(7) 0.1120(5) 0.1102(4) 0.038(2) Uani 1 1 d . . . . .
 C99 C 0.2096(7) 0.0833(5) 0.1334(5) 0.052(3) Uani 1 1 d . . . . .
 H99A H 0.2147 0.1078 0.1769 0.078 Uiso 1 1 calc GR . . . .
 H99B H 0.1482 0.0352 0.1270 0.078 Uiso 1 1 calc GR . . . .
 H99C H 0.1944 0.1156 0.1047 0.078 Uiso 1 1 calc GR . . . .
 C98 C 0.4118(10) -0.1017(6) 0.0769(5) 0.068(3) Uani 1 1 d . . . . .
 H98A H 0.3646 -0.1315 0.1055 0.102 Uiso 1 1 calc GR . . . .
 H98B H 0.4886 -0.1043 0.0819 0.102 Uiso 1 1 calc GR . . . .
 H98C H 0.3800 -0.1216 0.0334 0.102 Uiso 1 1 calc GR . . . .
 C97 C 0.6377(7) 0.1708(5) 0.1141(4) 0.046(2) Uani 1 1 d . . . . .
 H97A H 0.6424 0.1984 0.0784 0.069 Uiso 1 1 calc GR . . . .
 H97B H 0.6957 0.1460 0.1130 0.069 Uiso 1 1 calc GR . . . .
 H97C H 0.6499 0.2059 0.1536 0.069 Uiso 1 1 calc GR . . . .
 C77 C 0.3113(8) 0.3148(6) 0.3171(4) 0.055(2) Uani 1 1 d . U . . .
 C78 C 0.221(5) 0.348(3) 0.3212(19) 0.054(5) Uani 0.50(2) 1 d . U P A 1
 H78A H 0.2505 0.3997 0.3434 0.081 Uiso 0.50(2) 1 calc GR . P A 1
 H78B H 0.1608 0.3184 0.3443 0.081 Uiso 0.50(2) 1 calc GR . P A 1
 H78C H 0.1894 0.3481 0.2787 0.081 Uiso 0.50(2) 1 calc GR . P A 1
 C79 C 0.346(2) 0.3035(19) 0.3786(11) 0.061(4) Uani 0.50(2) 1 d . U P A 1
 H79A H 0.3731 0.2601 0.3745 0.091 Uiso 0.50(2) 1 calc GR . P A 1
 H79B H 0.2814 0.2943 0.4043 0.091 Uiso 0.50(2) 1 calc GR . P A 1
 H79C H 0.4067 0.3483 0.3987 0.091 Uiso 0.50(2) 1 calc GR . P A 1
 C80 C 0.234(2) 0.2278(15) 0.2845(13) 0.057(4) Uani 0.50(2) 1 d . U P A 1
 H80A H 0.2096 0.2278 0.2408 0.086 Uiso 0.50(2) 1 calc GR . P A 1
 H80B H 0.1682 0.2100 0.3081 0.086 Uiso 0.50(2) 1 calc GR . P A 1
 H80C H 0.2804 0.1945 0.2856 0.086 Uiso 0.50(2) 1 calc GR . P A 1
 C78' C 0.224(5) 0.360(3) 0.3112(19) 0.056(5) Uani 0.50(2) 1 d . U P A 2
 H78D H 0.2650 0.4139 0.3168 0.084 Uiso 0.50(2) 1 calc GR . P A 2
 H78E H 0.1708 0.3495 0.3438 0.084 Uiso 0.50(2) 1 calc GR . P A 2
 H78F H 0.1819 0.3441 0.2696 0.084 Uiso 0.50(2) 1 calc GR . P A 2
 C79' C 0.373(2) 0.3512(19) 0.3895(11) 0.063(4) Uani 0.50(2) 1 d . U P A 2
 H79D H 0.4420 0.3381 0.3953 0.094 Uiso 0.50(2) 1 calc GR . P A 2
 H79E H 0.3209 0.3310 0.4205 0.094 Uiso 0.50(2) 1 calc GR . P A 2
 H79F H 0.3918 0.4060 0.3952 0.094 Uiso 0.50(2) 1 calc GR . P A 2
 C80' C 0.271(2) 0.2360(16) 0.3113(13) 0.057(4) Uani 0.50(2) 1 d . U P A 2
 H80D H 0.2231 0.2152 0.2716 0.085 Uiso 0.50(2) 1 calc GR . P A 2
 H80E H 0.2258 0.2213 0.3466 0.085 Uiso 0.50(2) 1 calc GR . P A 2
 H80F H 0.3345 0.2165 0.3116 0.085 Uiso 0.50(2) 1 calc GR . P A 2
 C73 C 0.5290(10) 0.4658(6) 0.2893(6) 0.067(2) Uani 1 1 d . U . . .
 C74 C 0.445(3) 0.5122(17) 0.2793(13) 0.066(4) Uani 0.565(18) 1 d . U P B 1
 H74A H 0.4217 0.5059 0.2343 0.099 Uiso 0.565(18) 1 calc GR . P B 1
 H74B H 0.4835 0.5655 0.2950 0.099 Uiso 0.565(18) 1 calc GR . P B 1
 H74C H 0.3784 0.4937 0.3023 0.099 Uiso 0.565(18) 1 calc GR . P B 1
 C75 C 0.6363(19) 0.4963(12) 0.2683(13) 0.073(4) Uani 0.565(18) 1 d . U P B 1
 H75A H 0.6900 0.4763 0.2883 0.110 Uiso 0.565(18) 1 calc GR . P B 1
 H75B H 0.6616 0.5511 0.2795 0.110 Uiso 0.565(18) 1 calc GR . P B 1
 H75C H 0.6323 0.4827 0.2225 0.110 Uiso 0.565(18) 1 calc GR . P B 1
 C76 C 0.537(2) 0.4773(12) 0.3670(11) 0.079(4) Uani 0.565(18) 1 d . U P B 1
 H76A H 0.4623 0.4731 0.3814 0.118 Uiso 0.565(18) 1 calc GR . P B 1
 H76B H 0.5902 0.5271 0.3839 0.118 Uiso 0.565(18) 1 calc GR . P B 1
 H76C H 0.5638 0.4386 0.3818 0.118 Uiso 0.565(18) 1 calc GR . P B 1
 C74' C 0.466(3) 0.517(2) 0.3017(18) 0.068(5) Uani 0.435(18) 1 d . U P B 2
 H74D H 0.4120 0.5103 0.2654 0.101 Uiso 0.435(18) 1 calc GR . P B 2
 H74E H 0.5173 0.5683 0.3094 0.101 Uiso 0.435(18) 1 calc GR . P B 2
 H74F H 0.4242 0.5058 0.3389 0.101 Uiso 0.435(18) 1 calc GR . P B 2
 C75' C 0.606(3) 0.5013(16) 0.2328(17) 0.076(5) Uani 0.435(18) 1 d . U P B 2
 H75D H 0.6629 0.4761 0.2249 0.114 Uiso 0.435(18) 1 calc GR . P B 2
 H75E H 0.6443 0.5552 0.2461 0.114 Uiso 0.435(18) 1 calc GR . P B 2
 H75F H 0.5570 0.4935 0.1942 0.114 Uiso 0.435(18) 1 calc GR . P B 2
 C76' C 0.620(3) 0.4866(15) 0.3471(15) 0.078(5) Uani 0.435(18) 1 d . U P B 2
 H76D H 0.5856 0.4988 0.3857 0.118 Uiso 0.435(18) 1 calc GR . P B 2
 H76E H 0.6835 0.5301 0.3411 0.118 Uiso 0.435(18) 1 calc GR . P B 2
 H76F H 0.6463 0.4438 0.3507 0.118 Uiso 0.435(18) 1 calc GR . P B 2
 C66 C 0.0016(6) 0.2444(5) 0.0455(4) 0.040(2) Uani 1 1 d . . . . .
 C71 C -0.0948(8) 0.2596(6) 0.0367(5) 0.054(3) Uani 1 1 d . . . . .
 H71 H -0.1331 0.2679 0.0729 0.065 Uiso 1 1 calc R . . . .
 C70 C -0.1424(8) 0.2640(6) -0.0200(5) 0.053(3) Uani 1 1 d . . . . .
 H70 H -0.2112 0.2751 -0.0231 0.063 Uiso 1 1 calc R . . . .
 C69 C -0.0887(8) 0.2522(6) -0.0722(5) 0.054(3) Uani 1 1 d . . . . .
 H69 H -0.1210 0.2530 -0.1127 0.064 Uiso 1 1 calc R . . . .
 C68 C 0.0138(8) 0.2388(7) -0.0656(5) 0.067(3) Uani 1 1 d . . . . .
 H68 H 0.0533 0.2317 -0.1015 0.081 Uiso 1 1 calc R . . . .
 C67 C 0.0573(8) 0.2358(6) -0.0073(5) 0.060(3) Uani 1 1 d . . . . .
 H67 H 0.1282 0.2276 -0.0030 0.072 Uiso 1 1 calc R . . . .
 C61 C -0.0380(7) 0.0913(5) 0.1714(5) 0.045(2) Uani 1 1 d . . . . .
 H61 H 0.0159 0.1164 0.2061 0.054 Uiso 1 1 calc R . . . .
 C62 C -0.1107(8) 0.0200(6) 0.1734(5) 0.059(3) Uani 1 1 d . . . . .
 H62 H -0.1099 -0.0022 0.2104 0.071 Uiso 1 1 calc R . . . .
 C63 C -0.1826(10) -0.0181(6) 0.1232(6) 0.069(3) Uani 1 1 d . . . . .
 H63 H -0.2320 -0.0673 0.1249 0.083 Uiso 1 1 calc R . . . .
 C64 C -0.1853(10) 0.0129(6) 0.0700(6) 0.072(3) Uani 1 1 d . . . . .
 H64 H -0.2341 -0.0155 0.0343 0.087 Uiso 1 1 calc R . . . .
 C65 C -0.1169(8) 0.0862(5) 0.0675(5) 0.052(2) Uani 1 1 d . . . . .
 H65 H -0.1211 0.1081 0.0306 0.063 Uiso 1 1 calc R . . . .
 C60 C -0.0425(7) 0.1272(5) 0.1191(4) 0.038(2) Uani 1 1 d . . . . .
 C54 C -0.0092(6) 0.2774(5) 0.1795(4) 0.0360(19) Uani 1 1 d . . . . .
 C59 C -0.0860(8) 0.2460(5) 0.2195(4) 0.046(2) Uani 1 1 d . . . . .
 H59 H -0.1146 0.1929 0.2163 0.056 Uiso 1 1 calc R . . . .
 C58 C -0.1226(8) 0.2891(6) 0.2638(5) 0.053(3) Uani 1 1 d . . . . .
 H58 H -0.1740 0.2658 0.2920 0.064 Uiso 1 1 calc R . . . .
 C57 C -0.0864(9) 0.3645(6) 0.2679(5) 0.058(3) Uani 1 1 d . . . . .
 H57 H -0.1128 0.3941 0.2989 0.070 Uiso 1 1 calc R . . . .
 C56 C -0.0128(9) 0.3978(6) 0.2282(5) 0.062(3) Uani 1 1 d . . . . .
 H56 H 0.0111 0.4509 0.2304 0.074 Uiso 1 1 calc R . . . .
 C55 C 0.0278(7) 0.3546(5) 0.1844(5) 0.051(2) Uani 1 1 d . . . . .
 H55 H 0.0816 0.3783 0.1575 0.062 Uiso 1 1 calc R . . . .
 C72 C 0.2877(7) 0.3386(6) 0.1386(4) 0.043(2) Uani 1 1 d . . . . .
 Pt1 Pt 0.36031(2) 0.74693(2) 0.31369(2) 0.02052(8) Uani 1 1 d . . . . .
 P1 P 0.17155(14) 0.68781(10) 0.32803(8) 0.0191(4) Uani 1 1 d . . . . .
 P2 P 0.55128(15) 0.80480(11) 0.30570(9) 0.0233(4) Uani 1 1 d . . . . .
 Al1 Al 0.18528(18) 0.86619(12) 0.34397(10) 0.0228(5) Uani 1 1 d . . . . .
 O1 O 0.3313(5) 0.7925(3) 0.1974(2) 0.0392(14) Uani 1 1 d . . . . .
 O2 O 0.2611(4) 0.8481(3) 0.2762(2) 0.0284(12) Uani 1 1 d . . . . .
 C28 C 0.1261(6) 0.7601(4) 0.3720(3) 0.0226(16) Uani 1 1 d . . . . .
 C52 C -0.0293(8) 0.8866(5) 0.5131(6) 0.060(3) Uani 1 1 d . . . . .
 H52 H -0.0576 0.9254 0.5038 0.072 Uiso 1 1 calc R . . . .
 C47 C 0.0914(5) 0.7437(4) 0.4290(3) 0.0238(16) Uani 1 1 d . . . . .
 H47 H 0.0924 0.6964 0.4384 0.029 Uiso 1 1 calc R . . . .
 C49 C 0.0515(7) 0.7733(5) 0.5394(4) 0.038(2) Uani 1 1 d . . . . .
 H49 H 0.0781 0.7339 0.5488 0.046 Uiso 1 1 calc R . . . .
 C48 C 0.0523(6) 0.7896(4) 0.4782(3) 0.0283(17) Uani 1 1 d . . . . .
 C38 C 0.1632(6) 0.6109(4) 0.3733(3) 0.0232(16) Uani 1 1 d . . . . .
 C53 C 0.0096(7) 0.8465(5) 0.4662(4) 0.045(2) Uani 1 1 d . . . . .
 H53 H 0.0072 0.8579 0.4246 0.054 Uiso 1 1 calc R . . . .
 C51 C -0.0269(8) 0.8699(6) 0.5740(5) 0.061(3) Uani 1 1 d . . . . .
 H51 H -0.0528 0.8976 0.6067 0.073 Uiso 1 1 calc R . . . .
 C50 C 0.0127(8) 0.8135(6) 0.5868(4) 0.054(3) Uani 1 1 d . . . . .
 H50 H 0.0137 0.8018 0.6284 0.065 Uiso 1 1 calc R . . . .
 C43 C 0.0595(6) 0.5560(4) 0.3816(3) 0.0279(17) Uani 1 1 d . . . . .
 C42 C 0.0602(7) 0.4999(4) 0.4172(4) 0.0348(19) Uani 1 1 d . . . . .
 H42 H -0.0097 0.4636 0.4226 0.042 Uiso 1 1 calc R . . . .
 C41 C 0.1585(8) 0.4950(4) 0.4450(4) 0.036(2) Uani 1 1 d . . . . .
 C40 C 0.2593(7) 0.5486(5) 0.4370(4) 0.0344(19) Uani 1 1 d . . . . .
 H40 H 0.3275 0.5461 0.4560 0.041 Uiso 1 1 calc R . . . .
 C39 C 0.2644(6) 0.6063(4) 0.4022(3) 0.0266(17) Uani 1 1 d . . . . .
 C46 C -0.0526(6) 0.5569(4) 0.3560(4) 0.0358(19) Uani 1 1 d . . . . .
 H46A H -0.1130 0.5190 0.3724 0.054 Uiso 1 1 calc GR . . . .
 H46B H -0.0587 0.5456 0.3099 0.054 Uiso 1 1 calc GR . . . .
 H46C H -0.0598 0.6067 0.3687 0.054 Uiso 1 1 calc GR . . . .
 C45 C 0.1567(9) 0.4320(5) 0.4836(4) 0.050(2) Uani 1 1 d . . . . .
 H45A H 0.1144 0.4367 0.5204 0.075 Uiso 1 1 calc GR . . . .
 H45B H 0.2344 0.4362 0.4974 0.075 Uiso 1 1 calc GR . . . .
 H45C H 0.1203 0.3831 0.4574 0.075 Uiso 1 1 calc GR . . . .
 C44 C 0.3781(6) 0.6607(5) 0.3975(4) 0.0349(19) Uani 1 1 d . . . . .
 H44A H 0.4335 0.6525 0.4268 0.052 Uiso 1 1 calc GR . . . .
 H44B H 0.3759 0.7121 0.4083 0.052 Uiso 1 1 calc GR . . . .
 H44C H 0.3997 0.6534 0.3544 0.052 Uiso 1 1 calc GR . . . .
 C29 C 0.0857(6) 0.6444(4) 0.2535(3) 0.0215(15) Uani 1 1 d . . . . .
 C30 C 0.1262(6) 0.5961(4) 0.2115(3) 0.0264(17) Uani 1 1 d . . . . .
 C31 C 0.0691(7) 0.5649(5) 0.1525(4) 0.037(2) Uani 1 1 d . . . . .
 H31 H 0.0989 0.5341 0.1245 0.044 Uiso 1 1 calc R . . . .
 C32 C -0.0296(7) 0.5774(5) 0.1331(4) 0.038(2) Uani 1 1 d . . . . .
 C33 C -0.0710(7) 0.6219(5) 0.1751(4) 0.037(2) Uani 1 1 d . . . . .
 H33 H -0.1388 0.6307 0.1625 0.045 Uiso 1 1 calc R . . . .
 C34 C -0.0184(6) 0.6545(4) 0.2350(4) 0.0297(18) Uani 1 1 d . . . . .
 C35 C 0.2306(7) 0.5756(5) 0.2272(4) 0.037(2) Uani 1 1 d . . . . .
 H35A H 0.2393 0.5388 0.1930 0.055 Uiso 1 1 calc GR . . . .
 H35B H 0.2229 0.5541 0.2664 0.055 Uiso 1 1 calc GR . . . .
 H35C H 0.2972 0.6208 0.2325 0.055 Uiso 1 1 calc GR . . . .
 C36 C -0.0871(9) 0.5458(7) 0.0675(4) 0.068(3) Uani 1 1 d . . . . .
 H36A H -0.1639 0.5488 0.0658 0.102 Uiso 1 1 calc GR . . . .
 H36B H -0.0904 0.4932 0.0572 0.102 Uiso 1 1 calc GR . . . .
 H36C H -0.0440 0.5749 0.0371 0.102 Uiso 1 1 calc GR . . . .
 C37 C -0.0827(6) 0.6947(5) 0.2763(4) 0.0358(19) Uani 1 1 d . . . . .
 H37A H -0.1289 0.7143 0.2500 0.054 Uiso 1 1 calc GR . . . .
 H37B H -0.0291 0.7363 0.3051 0.054 Uiso 1 1 calc GR . . . .
 H37C H -0.1317 0.6595 0.3008 0.054 Uiso 1 1 calc GR . . . .
 C24 C 0.0838(7) 0.9127(4) 0.2985(4) 0.0333(18) Uani 1 1 d . . . . .
 C25 C 0.0488(8) 0.8726(6) 0.2300(4) 0.051(2) Uani 1 1 d . . . . .
 H25A H 0.0058 0.8196 0.2300 0.077 Uiso 1 1 calc GR . . . .
 H25B H 0.1166 0.8761 0.2076 0.077 Uiso 1 1 calc GR . . . .
 H25C H 0.0019 0.8965 0.2088 0.077 Uiso 1 1 calc GR . . . .
 C26 C 0.1593(8) 0.9939(5) 0.2932(5) 0.051(2) Uani 1 1 d . . . . .
 H26A H 0.1139 1.0198 0.2732 0.076 Uiso 1 1 calc GR . . . .
 H26B H 0.2217 0.9918 0.2677 0.076 Uiso 1 1 calc GR . . . .
 H26C H 0.1897 1.0213 0.3353 0.076 Uiso 1 1 calc GR . . . .
 C27 C -0.0233(8) 0.9185(6) 0.3283(5) 0.052(3) Uani 1 1 d . . . . .
 H27A H -0.0639 0.9410 0.3012 0.079 Uiso 1 1 calc GR . . . .
 H27B H -0.0023 0.9499 0.3697 0.079 Uiso 1 1 calc GR . . . .
 H27C H -0.0722 0.8682 0.3331 0.079 Uiso 1 1 calc GR . . . .
 C20 C 0.2999(6) 0.9360(4) 0.4128(3) 0.0254(16) Uani 1 1 d . . . . .
 C21 C 0.3972(7) 0.9855(5) 0.3804(4) 0.049(2) Uani 1 1 d . . . . .
 H21A H 0.4599 1.0138 0.4120 0.073 Uiso 1 1 calc GR . . . .
 H21B H 0.3705 1.0205 0.3597 0.073 Uiso 1 1 calc GR . . . .
 H21C H 0.4232 0.9535 0.3490 0.073 Uiso 1 1 calc GR . . . .
 C23 C 0.2568(8) 0.9890(5) 0.4589(4) 0.050(2) Uani 1 1 d . . . . .
 H23A H 0.1937 0.9591 0.4797 0.075 Uiso 1 1 calc GR . . . .
 H23B H 0.2313 1.0226 0.4356 0.075 Uiso 1 1 calc GR . . . .
 H23C H 0.3182 1.0189 0.4907 0.075 Uiso 1 1 calc GR . . . .
 C22 C 0.3504(8) 0.8912(5) 0.4521(4) 0.048(2) Uani 1 1 d . . . . .
 H22A H 0.3774 0.8564 0.4242 0.073 Uiso 1 1 calc GR . . . .
 H22B H 0.2925 0.8627 0.4768 0.073 Uiso 1 1 calc GR . . . .
 H22C H 0.4137 0.9256 0.4806 0.073 Uiso 1 1 calc GR . . . .
 C13 C 0.6276(6) 0.7831(4) 0.3701(3) 0.0260(17) Uani 1 1 d . . . . .
 C14 C 0.6930(6) 0.7365(5) 0.3612(4) 0.037(2) Uani 1 1 d . . . . .
 H14 H 0.7034 0.7171 0.3197 0.044 Uiso 1 1 calc R . . . .
 C15 C 0.7421(8) 0.7183(6) 0.4107(4) 0.048(2) Uani 1 1 d . . . . .
 H15 H 0.7878 0.6870 0.4032 0.058 Uiso 1 1 calc R . . . .
 C16 C 0.7283(8) 0.7436(6) 0.4720(5) 0.055(3) Uani 1 1 d . . . . .
 H16 H 0.7634 0.7295 0.5061 0.066 Uiso 1 1 calc R . . . .
 C17 C 0.6621(7) 0.7901(5) 0.4828(4) 0.047(2) Uani 1 1 d . . . . .
 H17 H 0.6519 0.8087 0.5246 0.057 Uiso 1 1 calc R . . . .
 C18 C 0.6112(7) 0.8089(5) 0.4321(4) 0.038(2) Uani 1 1 d . . . . .
 H18 H 0.5645 0.8396 0.4393 0.046 Uiso 1 1 calc R . . . .
 C1 C 0.6069(6) 0.9055(4) 0.3067(4) 0.0298(18) Uani 1 1 d . . . . .
 C6 C 0.5682(7) 0.9362(5) 0.2590(4) 0.037(2) Uani 1 1 d . . . . .
 H6 H 0.5118 0.9046 0.2276 0.045 Uiso 1 1 calc R . . . .
 C5 C 0.6106(8) 1.0117(5) 0.2567(5) 0.052(2) Uani 1 1 d . . . . .
 H5 H 0.5841 1.0320 0.2235 0.063 Uiso 1 1 calc R . . . .
 C4 C 0.6911(9) 1.0582(5) 0.3022(5) 0.059(3) Uani 1 1 d . . . . .
 H4 H 0.7197 1.1106 0.3006 0.071 Uiso 1 1 calc R . . . .
 C3 C 0.7306(8) 1.0288(5) 0.3503(5) 0.054(3) Uani 1 1 d . . . . .
 H3 H 0.7863 1.0609 0.3818 0.065 Uiso 1 1 calc R . . . .
 C2 C 0.6887(7) 0.9524(5) 0.3524(4) 0.044(2) Uani 1 1 d . . . . .
 H2 H 0.7161 0.9321 0.3853 0.053 Uiso 1 1 calc R . . . .
 C7 C 0.6050(6) 0.7672(4) 0.2359(3) 0.0255(17) Uani 1 1 d . . . . .
 C8 C 0.7023(7) 0.8099(5) 0.2118(4) 0.040(2) Uani 1 1 d . . . . .
 H8 H 0.7387 0.8606 0.2305 0.048 Uiso 1 1 calc R . . . .
 C9 C 0.7457(7) 0.7793(5) 0.1613(4) 0.041(2) Uani 1 1 d . . . . .
 H9 H 0.8109 0.8092 0.1447 0.049 Uiso 1 1 calc R . . . .
 C10 C 0.6965(7) 0.7074(6) 0.1353(4) 0.046(2) Uani 1 1 d . . . . .
 H10 H 0.7258 0.6874 0.0995 0.056 Uiso 1 1 calc R . . . .
 C11 C 0.6044(8) 0.6626(6) 0.1595(4) 0.053(2) Uani 1 1 d . . . . .
 H11 H 0.5731 0.6108 0.1427 0.063 Uiso 1 1 calc R . . . .
 C12 C 0.5568(7) 0.6943(5) 0.2097(4) 0.036(2) Uani 1 1 d . . . . .
 H12 H 0.4904 0.6644 0.2253 0.043 Uiso 1 1 calc R . . . .
 C19 C 0.3113(6) 0.8027(4) 0.2514(4) 0.0294(18) Uani 1 1 d . . . . .
 C108 C 0.445(2) 0.466(2) -0.0037(13) 0.096(8) Uani 0.5 1 d D U P C -1
 H10A H 0.3682 0.4710 -0.0055 0.116 Uiso 0.5 1 calc R . P C -1
 H10B H 0.4399 0.4151 -0.0232 0.116 Uiso 0.5 1 calc R . P C -1
 C107 C 0.492(2) 0.481(2) 0.0584(12) 0.067(6) Uani 0.5 1 d D U P C -1
 H10C H 0.4829 0.4335 0.0748 0.080 Uiso 0.5 1 calc R . P C -1
 H10D H 0.4530 0.5105 0.0852 0.080 Uiso 0.5 1 calc R . P C -1
 O5 O 0.6080(12) 0.5228(9) 0.0594(7) 0.070(4) Uani 0.5 1 d D U P C -1
 C110 C 0.618(2) 0.552(2) 0.0027(13) 0.110(10) Uani 0.5 1 d D U P C -1
 H11A H 0.6376 0.6069 0.0112 0.132 Uiso 0.5 1 calc R . P C -1
 H11B H 0.6805 0.5397 -0.0191 0.132 Uiso 0.5 1 calc R . P C -1
 C109 C 0.519(4) 0.521(3) -0.0353(13) 0.122(12) Uani 0.5 1 d D U P C -1
 H10E H 0.5327 0.4971 -0.0767 0.146 Uiso 0.5 1 calc R . P C -1
 H10F H 0.4854 0.5604 -0.0422 0.146 Uiso 0.5 1 calc R . P C -1

loop_
  _atom_site_aniso_label
  _atom_site_aniso_U_11
  _atom_site_aniso_U_22
  _atom_site_aniso_U_33
  _atom_site_aniso_U_23
  _atom_site_aniso_U_13
  _atom_site_aniso_U_12
 Pt2 0.02045(17) 0.0437(2) 0.0439(2) 0.01418(16) 0.00794(14) 0.01086(15)
 P3 0.0200(10) 0.0335(11) 0.0291(11) 0.0078(9) 0.0052(8) 0.0073(8)
 P4 0.0198(10) 0.0415(13) 0.0450(13) 0.0152(10) 0.0076(9) 0.0107(9)
 Al2 0.0413(15) 0.0415(15) 0.0352(14) 0.0071(12) 0.0097(11) 0.0221(12)
 O3 0.045(4) 0.063(5) 0.079(5) 0.033(4) -0.014(4) 0.006(3)
 O4 0.049(4) 0.045(4) 0.047(4) 0.013(3) 0.006(3) 0.023(3)
 C81 0.024(4) 0.040(5) 0.026(4) 0.010(4) 0.010(3) 0.009(4)
 C100 0.029(4) 0.038(5) 0.039(5) 0.005(4) 0.006(4) 0.011(4)
 C101 0.030(4) 0.047(5) 0.037(5) 0.000(4) 0.007(4) 0.020(4)
 C106 0.052(6) 0.046(6) 0.040(5) 0.010(4) 0.001(4) 0.016(5)
 C105 0.063(7) 0.062(7) 0.046(6) -0.017(5) -0.006(5) 0.024(6)
 C104 0.072(7) 0.081(8) 0.033(5) 0.005(6) -0.005(5) 0.041(7)
 C103 0.097(9) 0.073(8) 0.042(6) 0.020(6) -0.004(6) 0.042(7)
 C102 0.072(7) 0.047(6) 0.048(6) 0.008(5) -0.006(5) 0.027(5)
 C82 0.037(5) 0.035(5) 0.028(4) 0.008(4) 0.008(3) 0.013(4)
 C87 0.026(4) 0.038(5) 0.042(5) -0.004(4) 0.011(4) 0.001(4)
 C86 0.037(5) 0.041(5) 0.049(6) 0.011(4) 0.015(4) 0.002(4)
 C85 0.038(5) 0.054(6) 0.038(5) 0.016(4) 0.016(4) 0.022(4)
 C84 0.036(5) 0.051(5) 0.035(5) 0.016(4) 0.008(4) 0.022(4)
 C83 0.033(4) 0.051(5) 0.027(4) 0.003(4) -0.002(3) 0.022(4)
 C90 0.052(6) 0.068(7) 0.046(6) -0.005(5) 0.020(5) -0.023(5)
 C89 0.050(6) 0.091(8) 0.061(7) 0.043(6) 0.032(5) 0.021(6)
 C88 0.040(5) 0.055(6) 0.037(5) 0.001(4) -0.001(4) 0.008(4)
 C91 0.031(4) 0.045(5) 0.031(4) 0.008(4) 0.006(3) 0.013(4)
 C96 0.029(4) 0.044(5) 0.043(5) 0.010(4) 0.007(4) 0.006(4)
 C95 0.044(5) 0.037(5) 0.054(6) 0.004(4) 0.008(4) 0.012(4)
 C94 0.057(6) 0.044(6) 0.047(6) 0.008(4) 0.013(5) 0.019(5)
 C93 0.046(5) 0.043(5) 0.049(6) 0.006(4) 0.011(4) 0.025(5)
 C92 0.037(5) 0.050(5) 0.032(5) 0.006(4) 0.008(4) 0.020(4)
 C99 0.024(5) 0.049(6) 0.082(7) 0.016(5) 0.010(5) 0.007(4)
 C98 0.080(8) 0.056(7) 0.075(8) 0.000(6) 0.024(6) 0.035(6)
 C97 0.025(4) 0.058(6) 0.057(6) 0.003(5) 0.005(4) 0.018(4)
 C77 0.056(5) 0.079(6) 0.047(5) 0.022(4) 0.024(4) 0.037(4)
 C78 0.054(7) 0.079(9) 0.047(9) 0.023(7) 0.023(8) 0.040(7)
 C79 0.063(8) 0.087(9) 0.046(7) 0.024(8) 0.026(6) 0.033(8)
 C80 0.060(8) 0.076(8) 0.046(8) 0.024(8) 0.029(7) 0.028(7)
 C78' 0.055(7) 0.081(9) 0.048(9) 0.022(7) 0.027(8) 0.036(8)
 C79' 0.065(8) 0.087(9) 0.046(7) 0.020(8) 0.025(6) 0.032(8)
 C80' 0.059(8) 0.076(7) 0.047(8) 0.026(8) 0.029(7) 0.029(7)
 C73 0.065(5) 0.043(4) 0.090(7) -0.010(5) -0.011(5) 0.024(4)
 C74 0.064(8) 0.042(7) 0.090(10) -0.007(8) -0.008(8) 0.023(6)
 C75 0.063(8) 0.045(7) 0.101(10) -0.009(8) -0.001(8) 0.010(7)
 C76 0.078(8) 0.052(7) 0.096(9) -0.016(7) -0.017(8) 0.021(7)
 C74' 0.063(9) 0.044(7) 0.092(10) -0.010(9) -0.006(9) 0.021(7)
 C75' 0.071(9) 0.045(7) 0.101(10) -0.010(8) 0.004(8) 0.012(7)
 C76' 0.074(9) 0.051(8) 0.098(9) -0.013(8) -0.023(8) 0.015(8)
 C66 0.019(4) 0.051(5) 0.053(6) 0.017(4) 0.009(4) 0.010(4)
 C71 0.048(6) 0.086(8) 0.046(6) 0.020(5) 0.021(5) 0.042(6)
 C70 0.038(5) 0.080(7) 0.054(6) 0.023(5) 0.011(5) 0.032(5)
 C69 0.038(5) 0.078(7) 0.045(6) 0.019(5) 0.002(4) 0.015(5)
 C68 0.049(6) 0.129(11) 0.041(6) 0.021(6) 0.018(5) 0.048(7)
 C67 0.040(5) 0.096(8) 0.061(7) 0.015(6) 0.012(5) 0.044(6)
 C61 0.021(4) 0.049(6) 0.062(6) 0.018(5) 0.005(4) 0.005(4)
 C62 0.048(6) 0.058(7) 0.078(8) 0.031(6) 0.009(5) 0.018(5)
 C63 0.070(8) 0.045(6) 0.080(8) 0.012(6) -0.008(6) -0.001(6)
 C64 0.068(8) 0.047(7) 0.080(8) 0.000(6) -0.018(6) -0.006(6)
 C65 0.052(6) 0.048(6) 0.053(6) 0.005(5) 0.002(5) 0.013(5)
 C60 0.025(4) 0.045(5) 0.050(5) 0.011(4) 0.014(4) 0.017(4)
 C54 0.023(4) 0.040(5) 0.045(5) 0.009(4) -0.004(4) 0.009(4)
 C59 0.046(5) 0.043(5) 0.047(6) 0.003(4) 0.009(4) 0.011(4)
 C58 0.054(6) 0.053(6) 0.052(6) 0.003(5) 0.019(5) 0.016(5)
 C57 0.058(7) 0.046(6) 0.067(7) 0.000(5) 0.014(5) 0.013(5)
 C56 0.059(7) 0.040(6) 0.086(8) 0.006(5) 0.016(6) 0.015(5)
 C55 0.036(5) 0.043(6) 0.074(7) 0.022(5) 0.016(5) 0.005(4)
 C72 0.019(4) 0.074(7) 0.044(5) 0.034(5) 0.009(4) 0.017(4)
 Pt1 0.01455(14) 0.02452(16) 0.02322(15) 0.00402(11) 0.00472(11) 0.00683(11)
 P1 0.0167(9) 0.0190(9) 0.0216(10) 0.0028(7) 0.0067(7) 0.0053(7)
 P2 0.0152(9) 0.0266(10) 0.0277(10) 0.0044(8) 0.0038(8) 0.0059(8)
 Al1 0.0225(11) 0.0242(12) 0.0235(12) 0.0034(9) 0.0037(9) 0.0098(9)
 O1 0.054(4) 0.049(4) 0.023(3) 0.012(3) 0.013(3) 0.024(3)
 O2 0.034(3) 0.031(3) 0.029(3) 0.012(2) 0.015(2) 0.018(2)
 C28 0.020(4) 0.024(4) 0.020(4) -0.008(3) -0.003(3) 0.007(3)
 C52 0.057(6) 0.036(5) 0.097(9) 0.010(5) 0.043(6) 0.025(5)
 C47 0.016(4) 0.023(4) 0.033(4) 0.007(3) 0.012(3) 0.005(3)
 C49 0.037(5) 0.038(5) 0.036(5) -0.001(4) 0.011(4) 0.006(4)
 C48 0.027(4) 0.026(4) 0.029(4) -0.003(3) 0.016(3) 0.004(3)
 C38 0.027(4) 0.020(4) 0.023(4) 0.003(3) 0.007(3) 0.006(3)
 C53 0.044(5) 0.042(5) 0.055(6) 0.008(4) 0.026(4) 0.020(4)
 C51 0.048(6) 0.047(6) 0.072(8) -0.015(5) 0.040(5) -0.002(5)
 C50 0.048(6) 0.062(7) 0.038(5) -0.010(5) 0.029(4) 0.001(5)
 C43 0.029(4) 0.026(4) 0.028(4) 0.003(3) 0.015(3) 0.008(3)
 C42 0.038(5) 0.027(4) 0.039(5) 0.007(4) 0.018(4) 0.007(4)
 C41 0.062(6) 0.027(4) 0.030(4) 0.011(4) 0.024(4) 0.023(4)
 C40 0.038(5) 0.044(5) 0.031(4) 0.007(4) 0.008(4) 0.026(4)
 C39 0.034(4) 0.027(4) 0.024(4) 0.006(3) 0.012(3) 0.016(3)
 C46 0.030(4) 0.030(4) 0.043(5) 0.006(4) 0.014(4) 0.002(4)
 C45 0.074(7) 0.043(5) 0.049(6) 0.026(5) 0.024(5) 0.030(5)
 C44 0.031(4) 0.041(5) 0.040(5) 0.018(4) 0.005(4) 0.016(4)
 C29 0.019(4) 0.021(4) 0.023(4) 0.008(3) 0.008(3) 0.001(3)
 C30 0.022(4) 0.029(4) 0.026(4) 0.002(3) 0.009(3) 0.005(3)
 C31 0.029(4) 0.037(5) 0.037(5) -0.002(4) 0.013(4) 0.002(4)
 C32 0.030(4) 0.046(5) 0.025(4) 0.000(4) 0.000(3) -0.005(4)
 C33 0.028(4) 0.043(5) 0.037(5) 0.007(4) -0.003(4) 0.006(4)
 C34 0.023(4) 0.032(4) 0.031(4) 0.006(3) 0.007(3) 0.003(3)
 C35 0.034(5) 0.037(5) 0.038(5) -0.004(4) 0.013(4) 0.012(4)
 C36 0.062(7) 0.082(8) 0.041(6) -0.008(5) -0.010(5) 0.003(6)
 C37 0.023(4) 0.039(5) 0.047(5) 0.006(4) 0.005(4) 0.013(4)
 C24 0.032(4) 0.031(4) 0.040(5) 0.007(4) 0.002(4) 0.016(4)
 C25 0.048(6) 0.072(7) 0.039(5) 0.004(5) -0.008(4) 0.031(5)
 C26 0.050(6) 0.046(6) 0.064(6) 0.020(5) 0.000(5) 0.022(5)
 C27 0.051(6) 0.066(7) 0.059(6) 0.016(5) 0.008(5) 0.043(5)
 C20 0.025(4) 0.020(4) 0.030(4) 0.002(3) 0.004(3) 0.007(3)
 C21 0.031(5) 0.046(6) 0.054(6) 0.000(5) -0.001(4) -0.006(4)
 C23 0.058(6) 0.045(6) 0.041(5) -0.018(4) -0.002(4) 0.018(5)
 C22 0.044(5) 0.045(5) 0.052(6) 0.007(4) -0.023(4) 0.012(4)
 C13 0.011(3) 0.032(4) 0.031(4) 0.009(3) 0.001(3) -0.001(3)
 C14 0.029(4) 0.052(5) 0.035(5) 0.015(4) 0.002(4) 0.017(4)
 C15 0.040(5) 0.061(6) 0.053(6) 0.017(5) 0.011(4) 0.024(5)
 C16 0.041(6) 0.069(7) 0.057(7) 0.020(5) -0.007(5) 0.020(5)
 C17 0.034(5) 0.065(6) 0.034(5) 0.003(4) 0.002(4) 0.006(5)
 C18 0.029(4) 0.045(5) 0.036(5) 0.004(4) 0.001(4) 0.007(4)
 C1 0.018(4) 0.030(4) 0.040(5) 0.003(4) 0.012(3) 0.006(3)
 C6 0.035(5) 0.033(5) 0.040(5) 0.011(4) 0.007(4) 0.004(4)
 C5 0.057(6) 0.048(6) 0.060(6) 0.018(5) 0.016(5) 0.023(5)
 C4 0.053(6) 0.033(5) 0.087(8) 0.012(5) 0.021(6) 0.003(5)
 C3 0.044(6) 0.033(5) 0.073(7) -0.003(5) -0.002(5) -0.002(4)
 C2 0.034(5) 0.039(5) 0.056(6) 0.008(4) 0.002(4) 0.008(4)
 C7 0.018(4) 0.042(5) 0.023(4) 0.011(3) 0.009(3) 0.016(3)
 C8 0.030(5) 0.055(6) 0.033(5) 0.004(4) 0.006(4) 0.009(4)
 C9 0.028(4) 0.060(6) 0.040(5) 0.004(5) 0.008(4) 0.021(4)
 C10 0.039(5) 0.077(7) 0.034(5) 0.004(5) 0.011(4) 0.035(5)
 C11 0.056(6) 0.054(6) 0.044(6) -0.011(5) 0.002(5) 0.021(5)
 C12 0.026(4) 0.037(5) 0.040(5) -0.001(4) 0.010(4) 0.005(4)
 C19 0.027(4) 0.027(4) 0.028(4) 0.006(3) 0.001(3) 0.000(3)
 C108 0.070(15) 0.12(2) 0.081(16) 0.004(16) 0.001(12) 0.009(14)
 C107 0.060(11) 0.064(14) 0.075(14) 0.000(12) 0.018(11) 0.020(10)
 O5 0.058(8) 0.083(10) 0.065(8) 0.025(8) 0.015(7) 0.011(7)
 C110 0.101(17) 0.14(2) 0.049(12) 0.027(13) -0.003(14) -0.016(16)
 C109 0.104(19) 0.15(2) 0.077(19) 0.027(19) -0.016(15) -0.007(18)

_geom_special_details
;
 All esds (except the esd in the dihedral angle between two l.s. planes)
 are estimated using the full covariance matrix.  The cell esds are taken
 into account individually in the estimation of esds in distances, angles
 and torsion angles; correlations between esds in cell parameters are only
 used when they are defined by crystal symmetry.  An approximate (isotropic)
 treatment of cell esds is used for estimating esds involving l.s. planes.
;
loop_
  _geom_bond_atom_site_label_1
  _geom_bond_atom_site_label_2
  _geom_bond_distance
  _geom_bond_site_symmetry_2
  _geom_bond_publ_flag
 Pt2 P3 2.3256(19) . ?
 Pt2 P4 2.316(2) . ?
 Pt2 C72 1.958(10) . ?
 P3 C81 1.813(8) . ?
 P3 C82 1.843(8) . ?
 P3 C91 1.837(9) . ?
 P4 C66 1.815(9) . ?
 P4 C60 1.820(9) . ?
 P4 C54 1.835(9) . ?
 Al2 O4 1.834(6) . ?
 Al2 C81 2.072(8) . ?
 Al2 C77 2.037(9) . ?
 Al2 C73 2.047(11) . ?
 O3 C72 1.216(10) . ?
 O4 C72 1.298(10) . ?
 C81 C100 1.360(11) . ?
 C100 H100 0.9500 . ?
 C100 C101 1.478(11) . ?
 C101 C106 1.365(12) . ?
 C101 C102 1.387(12) . ?
 C106 H106 0.9500 . ?
 C106 C105 1.395(12) . ?
 C105 H105 0.9500 . ?
 C105 C104 1.389(14) . ?
 C104 H104 0.9500 . ?
 C104 C103 1.354(15) . ?
 C103 H103 0.9500 . ?
 C103 C102 1.370(13) . ?
 C102 H102 0.9500 . ?
 C82 C87 1.396(11) . ?
 C82 C83 1.423(11) . ?
 C87 C86 1.405(11) . ?
 C87 C90 1.520(12) . ?
 C86 H86 0.9500 . ?
 C86 C85 1.367(12) . ?
 C85 C84 1.386(12) . ?
 C85 C89 1.530(11) . ?
 C84 H84 0.9500 . ?
 C84 C83 1.391(11) . ?
 C83 C88 1.485(11) . ?
 C90 H90A 0.9800 . ?
 C90 H90B 0.9800 . ?
 C90 H90C 0.9800 . ?
 C89 H89A 0.9800 . ?
 C89 H89B 0.9800 . ?
 C89 H89C 0.9800 . ?
 C88 H88A 0.9800 . ?
 C88 H88B 0.9800 . ?
 C88 H88C 0.9800 . ?
 C91 C96 1.413(11) . ?
 C91 C92 1.413(11) . ?
 C96 C95 1.390(12) . ?
 C96 C99 1.516(11) . ?
 C95 H95 0.9500 . ?
 C95 C94 1.378(12) . ?
 C94 C93 1.380(12) . ?
 C94 C98 1.497(13) . ?
 C93 H93 0.9500 . ?
 C93 C92 1.401(12) . ?
 C92 C97 1.523(11) . ?
 C99 H99A 0.9800 . ?
 C99 H99B 0.9800 . ?
 C99 H99C 0.9800 . ?
 C98 H98A 0.9800 . ?
 C98 H98B 0.9800 . ?
 C98 H98C 0.9800 . ?
 C97 H97A 0.9800 . ?
 C97 H97B 0.9800 . ?
 C97 H97C 0.9800 . ?
 C77 C78 1.46(5) . ?
 C77 C79 1.44(2) . ?
 C77 C80 1.67(3) . ?
 C77 C78' 1.60(5) . ?
 C77 C79' 1.67(3) . ?
 C77 C80' 1.41(3) . ?
 C78 H78A 0.9800 . ?
 C78 H78B 0.9800 . ?
 C78 H78C 0.9800 . ?
 C79 H79A 0.9800 . ?
 C79 H79B 0.9800 . ?
 C79 H79C 0.9800 . ?
 C80 H80A 0.9800 . ?
 C80 H80B 0.9800 . ?
 C80 H80C 0.9800 . ?
 C78' H78D 0.9800 . ?
 C78' H78E 0.9800 . ?
 C78' H78F 0.9800 . ?
 C79' H79D 0.9800 . ?
 C79' H79E 0.9800 . ?
 C79' H79F 0.9800 . ?
 C80' H80D 0.9800 . ?
 C80' H80E 0.9800 . ?
 C80' H80F 0.9800 . ?
 C73 C74 1.59(3) . ?
 C73 C75 1.40(2) . ?
 C73 C76 1.65(2) . ?
 C73 C74' 1.43(4) . ?
 C73 C75' 1.66(3) . ?
 C73 C76' 1.57(3) . ?
 C74 H74A 0.9800 . ?
 C74 H74B 0.9800 . ?
 C74 H74C 0.9800 . ?
 C75 H75A 0.9800 . ?
 C75 H75B 0.9800 . ?
 C75 H75C 0.9800 . ?
 C76 H76A 0.9800 . ?
 C76 H76B 0.9800 . ?
 C76 H76C 0.9800 . ?
 C74' H74D 0.9800 . ?
 C74' H74E 0.9800 . ?
 C74' H74F 0.9800 . ?
 C75' H75D 0.9800 . ?
 C75' H75E 0.9800 . ?
 C75' H75F 0.9800 . ?
 C76' H76D 0.9800 . ?
 C76' H76E 0.9800 . ?
 C76' H76F 0.9800 . ?
 C66 C71 1.337(11) . ?
 C66 C67 1.373(12) . ?
 C71 H71 0.9500 . ?
 C71 C70 1.362(12) . ?
 C70 H70 0.9500 . ?
 C70 C69 1.359(13) . ?
 C69 H69 0.9500 . ?
 C69 C68 1.388(13) . ?
 C68 H68 0.9500 . ?
 C68 C67 1.365(13) . ?
 C67 H67 0.9500 . ?
 C61 H61 0.9500 . ?
 C61 C62 1.381(12) . ?
 C61 C60 1.400(12) . ?
 C62 H62 0.9500 . ?
 C62 C63 1.343(14) . ?
 C63 H63 0.9500 . ?
 C63 C64 1.360(15) . ?
 C64 H64 0.9500 . ?
 C64 C65 1.396(13) . ?
 C65 H65 0.9500 . ?
 C65 C60 1.392(12) . ?
 C54 C59 1.365(12) . ?
 C54 C55 1.380(12) . ?
 C59 H59 0.9500 . ?
 C59 C58 1.358(12) . ?
 C58 H58 0.9500 . ?
 C58 C57 1.348(13) . ?
 C57 H57 0.9500 . ?
 C57 C56 1.349(14) . ?
 C56 H56 0.9500 . ?
 C56 C55 1.382(13) . ?
 C55 H55 0.9500 . ?
 Pt1 P1 2.3274(17) . ?
 Pt1 P2 2.3192(18) . ?
 Pt1 C19 2.003(8) . ?
 P1 C28 1.812(7) . ?
 P1 C38 1.839(7) . ?
 P1 C29 1.833(7) . ?
 P2 C13 1.816(7) . ?
 P2 C1 1.814(8) . ?
 P2 C7 1.819(7) . ?
 Al1 O2 1.823(5) . ?
 Al1 C28 2.095(8) . ?
 Al1 C24 2.046(8) . ?
 Al1 C20 2.030(7) . ?
 O1 C19 1.201(9) . ?
 O2 C19 1.290(9) . ?
 C28 C47 1.361(10) . ?
 C52 H52 0.9500 . ?
 C52 C53 1.378(12) . ?
 C52 C51 1.391(15) . ?
 C47 H47 0.9500 . ?
 C47 C48 1.475(10) . ?
 C49 H49 0.9500 . ?
 C49 C48 1.392(11) . ?
 C49 C50 1.386(11) . ?
 C48 C53 1.394(11) . ?
 C38 C43 1.422(10) . ?
 C38 C39 1.420(10) . ?
 C53 H53 0.9500 . ?
 C51 H51 0.9500 . ?
 C51 C50 1.366(15) . ?
 C50 H50 0.9500 . ?
 C43 C42 1.394(11) . ?
 C43 C46 1.493(11) . ?
 C42 H42 0.9500 . ?
 C42 C41 1.380(12) . ?
 C41 C40 1.382(11) . ?
 C41 C45 1.539(11) . ?
 C40 H40 0.9500 . ?
 C40 C39 1.395(10) . ?
 C39 C44 1.489(10) . ?
 C46 H46A 0.9800 . ?
 C46 H46B 0.9800 . ?
 C46 H46C 0.9800 . ?
 C45 H45A 0.9800 . ?
 C45 H45B 0.9800 . ?
 C45 H45C 0.9800 . ?
 C44 H44A 0.9800 . ?
 C44 H44B 0.9800 . ?
 C44 H44C 0.9800 . ?
 C29 C30 1.421(10) . ?
 C29 C34 1.424(10) . ?
 C30 C31 1.392(10) . ?
 C30 C35 1.513(10) . ?
 C31 H31 0.9500 . ?
 C31 C32 1.387(12) . ?
 C32 C33 1.380(12) . ?
 C32 C36 1.514(11) . ?
 C33 H33 0.9500 . ?
 C33 C34 1.395(11) . ?
 C34 C37 1.509(10) . ?
 C35 H35A 0.9800 . ?
 C35 H35B 0.9800 . ?
 C35 H35C 0.9800 . ?
 C36 H36A 0.9800 . ?
 C36 H36B 0.9800 . ?
 C36 H36C 0.9800 . ?
 C37 H37A 0.9800 . ?
 C37 H37B 0.9800 . ?
 C37 H37C 0.9800 . ?
 C24 C25 1.544(11) . ?
 C24 C26 1.556(12) . ?
 C24 C27 1.536(11) . ?
 C25 H25A 0.9800 . ?
 C25 H25B 0.9800 . ?
 C25 H25C 0.9800 . ?
 C26 H26A 0.9800 . ?
 C26 H26B 0.9800 . ?
 C26 H26C 0.9800 . ?
 C27 H27A 0.9800 . ?
 C27 H27B 0.9800 . ?
 C27 H27C 0.9800 . ?
 C20 C21 1.541(11) . ?
 C20 C23 1.550(10) . ?
 C20 C22 1.525(11) . ?
 C21 H21A 0.9800 . ?
 C21 H21B 0.9800 . ?
 C21 H21C 0.9800 . ?
 C23 H23A 0.9800 . ?
 C23 H23B 0.9800 . ?
 C23 H23C 0.9800 . ?
 C22 H22A 0.9800 . ?
 C22 H22B 0.9800 . ?
 C22 H22C 0.9800 . ?
 C13 C14 1.381(11) . ?
 C13 C18 1.403(11) . ?
 C14 H14 0.9500 . ?
 C14 C15 1.346(11) . ?
 C15 H15 0.9500 . ?
 C15 C16 1.376(13) . ?
 C16 H16 0.9500 . ?
 C16 C17 1.392(13) . ?
 C17 H17 0.9500 . ?
 C17 C18 1.385(12) . ?
 C18 H18 0.9500 . ?
 C1 C6 1.387(11) . ?
 C1 C2 1.387(11) . ?
 C6 H6 0.9500 . ?
 C6 C5 1.373(12) . ?
 C5 H5 0.9500 . ?
 C5 C4 1.373(14) . ?
 C4 H4 0.9500 . ?
 C4 C3 1.383(14) . ?
 C3 H3 0.9500 . ?
 C3 C2 1.387(12) . ?
 C2 H2 0.9500 . ?
 C7 C8 1.396(10) . ?
 C7 C12 1.355(11) . ?
 C8 H8 0.9500 . ?
 C8 C9 1.375(11) . ?
 C9 H9 0.9500 . ?
 C9 C10 1.339(13) . ?
 C10 H10 0.9500 . ?
 C10 C11 1.369(13) . ?
 C11 H11 0.9500 . ?
 C11 C12 1.410(11) . ?
 C12 H12 0.9500 . ?
 C108 H10A 0.9900 . ?
 C108 H10B 0.9900 . ?
 C108 C107 1.39(3) . ?
 C108 C109 1.42(5) . ?
 C107 H10C 0.9900 . ?
 C107 H10D 0.9900 . ?
 C107 O5 1.42(3) . ?
 O5 C110 1.40(3) . ?
 C110 H11A 0.9900 . ?
 C110 H11B 0.9900 . ?
 C110 C109 1.38(3) . ?
 C109 H10E 0.9900 . ?
 C109 H10F 0.9900 . ?

loop_
  _geom_angle_atom_site_label_1
  _geom_angle_atom_site_label_2
  _geom_angle_atom_site_label_3
  _geom_angle
  _geom_angle_site_symmetry_1
  _geom_angle_site_symmetry_3
  _geom_angle_publ_flag
 P4 Pt2 P3 176.46(8) . . ?
 C72 Pt2 P3 91.0(2) . . ?
 C72 Pt2 P4 92.0(2) . . ?
 C81 P3 Pt2 107.0(2) . . ?
 C81 P3 C82 113.5(4) . . ?
 C81 P3 C91 110.3(4) . . ?
 C82 P3 Pt2 112.6(3) . . ?
 C91 P3 Pt2 109.9(3) . . ?
 C91 P3 C82 103.5(4) . . ?
 C66 P4 Pt2 115.4(3) . . ?
 C66 P4 C60 102.3(4) . . ?
 C66 P4 C54 104.5(4) . . ?
 C60 P4 Pt2 109.2(3) . . ?
 C60 P4 C54 103.2(4) . . ?
 C54 P4 Pt2 120.3(3) . . ?
 O4 Al2 C81 99.4(3) . . ?
 O4 Al2 C77 109.5(4) . . ?
 O4 Al2 C73 98.9(4) . . ?
 C77 Al2 C81 106.3(4) . . ?
 C77 Al2 C73 113.6(5) . . ?
 C73 Al2 C81 126.8(4) . . ?
 C72 O4 Al2 141.2(6) . . ?
 P3 C81 Al2 115.9(4) . . ?
 C100 C81 P3 114.3(6) . . ?
 C100 C81 Al2 125.2(6) . . ?
 C81 C100 H100 117.0 . . ?
 C81 C100 C101 126.0(8) . . ?
 C101 C100 H100 117.0 . . ?
 C106 C101 C100 122.4(8) . . ?
 C106 C101 C102 118.2(8) . . ?
 C102 C101 C100 119.4(8) . . ?
 C101 C106 H106 119.1 . . ?
 C101 C106 C105 121.8(9) . . ?
 C105 C106 H106 119.1 . . ?
 C106 C105 H105 120.7 . . ?
 C104 C105 C106 118.7(10) . . ?
 C104 C105 H105 120.7 . . ?
 C105 C104 H104 120.3 . . ?
 C103 C104 C105 119.4(9) . . ?
 C103 C104 H104 120.3 . . ?
 C104 C103 H103 119.2 . . ?
 C104 C103 C102 121.6(10) . . ?
 C102 C103 H103 119.2 . . ?
 C101 C102 H102 119.8 . . ?
 C103 C102 C101 120.3(10) . . ?
 C103 C102 H102 119.8 . . ?
 C87 C82 P3 125.1(6) . . ?
 C87 C82 C83 119.0(7) . . ?
 C83 C82 P3 115.9(6) . . ?
 C82 C87 C86 117.9(8) . . ?
 C82 C87 C90 125.6(7) . . ?
 C86 C87 C90 116.2(7) . . ?
 C87 C86 H86 118.0 . . ?
 C85 C86 C87 124.1(8) . . ?
 C85 C86 H86 118.0 . . ?
 C86 C85 C84 117.5(7) . . ?
 C86 C85 C89 121.8(8) . . ?
 C84 C85 C89 120.7(8) . . ?
 C85 C84 H84 119.2 . . ?
 C85 C84 C83 121.5(8) . . ?
 C83 C84 H84 119.2 . . ?
 C82 C83 C88 123.3(7) . . ?
 C84 C83 C82 120.0(8) . . ?
 C84 C83 C88 116.7(7) . . ?
 C87 C90 H90A 109.5 . . ?
 C87 C90 H90B 109.5 . . ?
 C87 C90 H90C 109.5 . . ?
 H90A C90 H90B 109.5 . . ?
 H90A C90 H90C 109.5 . . ?
 H90B C90 H90C 109.5 . . ?
 C85 C89 H89A 109.5 . . ?
 C85 C89 H89B 109.5 . . ?
 C85 C89 H89C 109.5 . . ?
 H89A C89 H89B 109.5 . . ?
 H89A C89 H89C 109.5 . . ?
 H89B C89 H89C 109.5 . . ?
 C83 C88 H88A 109.5 . . ?
 C83 C88 H88B 109.5 . . ?
 C83 C88 H88C 109.5 . . ?
 H88A C88 H88B 109.5 . . ?
 H88A C88 H88C 109.5 . . ?
 H88B C88 H88C 109.5 . . ?
 C96 C91 P3 120.0(6) . . ?
 C92 C91 P3 122.6(6) . . ?
 C92 C91 C96 117.3(8) . . ?
 C91 C96 C99 121.2(8) . . ?
 C95 C96 C91 121.0(8) . . ?
 C95 C96 C99 117.8(8) . . ?
 C96 C95 H95 119.3 . . ?
 C94 C95 C96 121.5(8) . . ?
 C94 C95 H95 119.3 . . ?
 C95 C94 C93 118.2(8) . . ?
 C95 C94 C98 120.8(9) . . ?
 C93 C94 C98 121.0(9) . . ?
 C94 C93 H93 118.9 . . ?
 C94 C93 C92 122.3(8) . . ?
 C92 C93 H93 118.9 . . ?
 C91 C92 C97 123.3(8) . . ?
 C93 C92 C91 119.7(8) . . ?
 C93 C92 C97 117.0(7) . . ?
 C96 C99 H99A 109.5 . . ?
 C96 C99 H99B 109.5 . . ?
 C96 C99 H99C 109.5 . . ?
 H99A C99 H99B 109.5 . . ?
 H99A C99 H99C 109.5 . . ?
 H99B C99 H99C 109.5 . . ?
 C94 C98 H98A 109.5 . . ?
 C94 C98 H98B 109.5 . . ?
 C94 C98 H98C 109.5 . . ?
 H98A C98 H98B 109.5 . . ?
 H98A C98 H98C 109.5 . . ?
 H98B C98 H98C 109.5 . . ?
 C92 C97 H97A 109.5 . . ?
 C92 C97 H97B 109.5 . . ?
 C92 C97 H97C 109.5 . . ?
 H97A C97 H97B 109.5 . . ?
 H97A C97 H97C 109.5 . . ?
 H97B C97 H97C 109.5 . . ?
 C78 C77 Al2 114.4(16) . . ?
 C78 C77 C80 98(2) . . ?
 C79 C77 Al2 120.5(12) . . ?
 C79 C77 C78 110.1(19) . . ?
 C79 C77 C80 101.8(15) . . ?
 C80 C77 Al2 108.4(10) . . ?
 C78' C77 Al2 103.3(15) . . ?
 C78' C77 C79' 101(2) . . ?
 C79' C77 Al2 105.8(10) . . ?
 C80' C77 Al2 115.9(11) . . ?
 C80' C77 C78' 119(2) . . ?
 C80' C77 C79' 109.6(14) . . ?
 C77 C78 H78A 109.5 . . ?
 C77 C78 H78B 109.5 . . ?
 C77 C78 H78C 109.5 . . ?
 H78A C78 H78B 109.5 . . ?
 H78A C78 H78C 109.5 . . ?
 H78B C78 H78C 109.5 . . ?
 C77 C79 H79A 109.5 . . ?
 C77 C79 H79B 109.5 . . ?
 C77 C79 H79C 109.5 . . ?
 H79A C79 H79B 109.5 . . ?
 H79A C79 H79C 109.5 . . ?
 H79B C79 H79C 109.5 . . ?
 C77 C80 H80A 109.5 . . ?
 C77 C80 H80B 109.5 . . ?
 C77 C80 H80C 109.5 . . ?
 H80A C80 H80B 109.5 . . ?
 H80A C80 H80C 109.5 . . ?
 H80B C80 H80C 109.5 . . ?
 C77 C78' H78D 109.5 . . ?
 C77 C78' H78E 109.5 . . ?
 C77 C78' H78F 109.5 . . ?
 H78D C78' H78E 109.5 . . ?
 H78D C78' H78F 109.5 . . ?
 H78E C78' H78F 109.5 . . ?
 C77 C79' H79D 109.5 . . ?
 C77 C79' H79E 109.5 . . ?
 C77 C79' H79F 109.5 . . ?
 H79D C79' H79E 109.5 . . ?
 H79D C79' H79F 109.5 . . ?
 H79E C79' H79F 109.5 . . ?
 C77 C80' H80D 109.5 . . ?
 C77 C80' H80E 109.5 . . ?
 C77 C80' H80F 109.5 . . ?
 H80D C80' H80E 109.5 . . ?
 H80D C80' H80F 109.5 . . ?
 H80E C80' H80F 109.5 . . ?
 C74 C73 Al2 102.0(12) . . ?
 C74 C73 C76 97.7(14) . . ?
 C75 C73 Al2 122.1(11) . . ?
 C75 C73 C74 114.3(18) . . ?
 C75 C73 C76 110.3(15) . . ?
 C76 C73 Al2 107.4(10) . . ?
 C74' C73 Al2 112.8(17) . . ?
 C74' C73 C75' 102(2) . . ?
 C74' C73 C76' 104.9(18) . . ?
 C75' C73 Al2 110.2(12) . . ?
 C76' C73 Al2 122.6(12) . . ?
 C76' C73 C75' 102.2(18) . . ?
 C73 C74 H74A 109.5 . . ?
 C73 C74 H74B 109.5 . . ?
 C73 C74 H74C 109.5 . . ?
 H74A C74 H74B 109.5 . . ?
 H74A C74 H74C 109.5 . . ?
 H74B C74 H74C 109.5 . . ?
 C73 C75 H75A 109.5 . . ?
 C73 C75 H75B 109.5 . . ?
 C73 C75 H75C 109.5 . . ?
 H75A C75 H75B 109.5 . . ?
 H75A C75 H75C 109.5 . . ?
 H75B C75 H75C 109.5 . . ?
 C73 C76 H76A 109.5 . . ?
 C73 C76 H76B 109.5 . . ?
 C73 C76 H76C 109.5 . . ?
 H76A C76 H76B 109.5 . . ?
 H76A C76 H76C 109.5 . . ?
 H76B C76 H76C 109.5 . . ?
 C73 C74' H74D 109.5 . . ?
 C73 C74' H74E 109.5 . . ?
 C73 C74' H74F 109.5 . . ?
 H74D C74' H74E 109.5 . . ?
 H74D C74' H74F 109.5 . . ?
 H74E C74' H74F 109.5 . . ?
 C73 C75' H75D 109.5 . . ?
 C73 C75' H75E 109.5 . . ?
 C73 C75' H75F 109.5 . . ?
 H75D C75' H75E 109.5 . . ?
 H75D C75' H75F 109.5 . . ?
 H75E C75' H75F 109.5 . . ?
 C73 C76' H76D 109.5 . . ?
 C73 C76' H76E 109.5 . . ?
 C73 C76' H76F 109.5 . . ?
 H76D C76' H76E 109.5 . . ?
 H76D C76' H76F 109.5 . . ?
 H76E C76' H76F 109.5 . . ?
 C71 C66 P4 122.5(7) . . ?
 C71 C66 C67 116.1(9) . . ?
 C67 C66 P4 121.0(7) . . ?
 C66 C71 H71 117.5 . . ?
 C66 C71 C70 125.0(9) . . ?
 C70 C71 H71 117.5 . . ?
 C71 C70 H70 120.9 . . ?
 C69 C70 C71 118.2(9) . . ?
 C69 C70 H70 120.9 . . ?
 C70 C69 H69 120.4 . . ?
 C70 C69 C68 119.3(9) . . ?
 C68 C69 H69 120.4 . . ?
 C69 C68 H68 120.3 . . ?
 C67 C68 C69 119.5(9) . . ?
 C67 C68 H68 120.3 . . ?
 C66 C67 H67 119.1 . . ?
 C68 C67 C66 121.9(8) . . ?
 C68 C67 H67 119.1 . . ?
 C62 C61 H61 119.5 . . ?
 C62 C61 C60 121.0(9) . . ?
 C60 C61 H61 119.5 . . ?
 C61 C62 H62 119.9 . . ?
 C63 C62 C61 120.3(10) . . ?
 C63 C62 H62 119.9 . . ?
 C62 C63 H63 119.7 . . ?
 C62 C63 C64 120.7(10) . . ?
 C64 C63 H63 119.7 . . ?
 C63 C64 H64 119.7 . . ?
 C63 C64 C65 120.6(10) . . ?
 C65 C64 H64 119.7 . . ?
 C64 C65 H65 120.1 . . ?
 C60 C65 C64 119.8(10) . . ?
 C60 C65 H65 120.1 . . ?
 C61 C60 P4 120.1(7) . . ?
 C65 C60 P4 122.4(7) . . ?
 C65 C60 C61 117.5(8) . . ?
 C59 C54 P4 124.2(7) . . ?
 C59 C54 C55 117.5(8) . . ?
 C55 C54 P4 118.3(7) . . ?
 C54 C59 H59 119.3 . . ?
 C58 C59 C54 121.4(9) . . ?
 C58 C59 H59 119.3 . . ?
 C59 C58 H58 119.7 . . ?
 C57 C58 C59 120.5(9) . . ?
 C57 C58 H58 119.7 . . ?
 C58 C57 H57 119.9 . . ?
 C58 C57 C56 120.1(10) . . ?
 C56 C57 H57 119.9 . . ?
 C57 C56 H56 120.1 . . ?
 C57 C56 C55 119.8(9) . . ?
 C55 C56 H56 120.1 . . ?
 C54 C55 C56 120.6(9) . . ?
 C54 C55 H55 119.7 . . ?
 C56 C55 H55 119.7 . . ?
 O3 C72 Pt2 121.1(7) . . ?
 O3 C72 O4 122.9(9) . . ?
 O4 C72 Pt2 116.0(6) . . ?
 P2 Pt1 P1 176.44(7) . . ?
 C19 Pt1 P1 89.4(2) . . ?
 C19 Pt1 P2 93.8(2) . . ?
 C28 P1 Pt1 105.0(2) . . ?
 C28 P1 C38 111.2(3) . . ?
 C28 P1 C29 113.4(3) . . ?
 C38 P1 Pt1 108.6(2) . . ?
 C29 P1 Pt1 112.5(2) . . ?
 C29 P1 C38 106.2(3) . . ?
 C13 P2 Pt1 107.0(2) . . ?
 C13 P2 C7 103.6(3) . . ?
 C1 P2 Pt1 120.4(2) . . ?
 C1 P2 C13 107.1(4) . . ?
 C1 P2 C7 103.1(3) . . ?
 C7 P2 Pt1 114.2(2) . . ?
 O2 Al1 C28 102.1(3) . . ?
 O2 Al1 C24 95.9(3) . . ?
 O2 Al1 C20 108.0(3) . . ?
 C24 Al1 C28 123.4(3) . . ?
 C20 Al1 C28 108.1(3) . . ?
 C20 Al1 C24 116.3(3) . . ?
 C19 O2 Al1 142.1(5) . . ?
 P1 C28 Al1 115.4(4) . . ?
 C47 C28 P1 113.2(5) . . ?
 C47 C28 Al1 127.7(5) . . ?
 C53 C52 H52 120.2 . . ?
 C53 C52 C51 119.5(9) . . ?
 C51 C52 H52 120.2 . . ?
 C28 C47 H47 115.7 . . ?
 C28 C47 C48 128.6(7) . . ?
 C48 C47 H47 115.7 . . ?
 C48 C49 H49 119.4 . . ?
 C50 C49 H49 119.4 . . ?
 C50 C49 C48 121.3(9) . . ?
 C49 C48 C47 119.1(7) . . ?
 C49 C48 C53 117.3(7) . . ?
 C53 C48 C47 123.4(7) . . ?
 C43 C38 P1 123.0(6) . . ?
 C39 C38 P1 118.9(5) . . ?
 C39 C38 C43 118.1(6) . . ?
 C52 C53 C48 121.7(9) . . ?
 C52 C53 H53 119.1 . . ?
 C48 C53 H53 119.1 . . ?
 C52 C51 H51 120.0 . . ?
 C50 C51 C52 120.0(9) . . ?
 C50 C51 H51 120.0 . . ?
 C49 C50 H50 119.9 . . ?
 C51 C50 C49 120.1(9) . . ?
 C51 C50 H50 119.9 . . ?
 C38 C43 C46 123.0(7) . . ?
 C42 C43 C38 119.5(7) . . ?
 C42 C43 C46 117.5(7) . . ?
 C43 C42 H42 118.7 . . ?
 C41 C42 C43 122.5(7) . . ?
 C41 C42 H42 118.7 . . ?
 C42 C41 C40 117.9(7) . . ?
 C42 C41 C45 121.3(8) . . ?
 C40 C41 C45 120.7(8) . . ?
 C41 C40 H40 118.8 . . ?
 C41 C40 C39 122.4(7) . . ?
 C39 C40 H40 118.8 . . ?
 C38 C39 C44 123.3(6) . . ?
 C40 C39 C38 119.5(7) . . ?
 C40 C39 C44 117.2(7) . . ?
 C43 C46 H46A 109.5 . . ?
 C43 C46 H46B 109.5 . . ?
 C43 C46 H46C 109.5 . . ?
 H46A C46 H46B 109.5 . . ?
 H46A C46 H46C 109.5 . . ?
 H46B C46 H46C 109.5 . . ?
 C41 C45 H45A 109.5 . . ?
 C41 C45 H45B 109.5 . . ?
 C41 C45 H45C 109.5 . . ?
 H45A C45 H45B 109.5 . . ?
 H45A C45 H45C 109.5 . . ?
 H45B C45 H45C 109.5 . . ?
 C39 C44 H44A 109.5 . . ?
 C39 C44 H44B 109.5 . . ?
 C39 C44 H44C 109.5 . . ?
 H44A C44 H44B 109.5 . . ?
 H44A C44 H44C 109.5 . . ?
 H44B C44 H44C 109.5 . . ?
 C30 C29 P1 116.9(5) . . ?
 C30 C29 C34 117.8(6) . . ?
 C34 C29 P1 125.3(5) . . ?
 C29 C30 C35 123.4(7) . . ?
 C31 C30 C29 120.1(7) . . ?
 C31 C30 C35 116.5(7) . . ?
 C30 C31 H31 118.9 . . ?
 C32 C31 C30 122.2(7) . . ?
 C32 C31 H31 118.9 . . ?
 C31 C32 C36 121.1(8) . . ?
 C33 C32 C31 117.5(7) . . ?
 C33 C32 C36 121.4(8) . . ?
 C32 C33 H33 118.4 . . ?
 C32 C33 C34 123.3(8) . . ?
 C34 C33 H33 118.4 . . ?
 C29 C34 C37 125.5(7) . . ?
 C33 C34 C29 119.0(7) . . ?
 C33 C34 C37 115.4(7) . . ?
 C30 C35 H35A 109.5 . . ?
 C30 C35 H35B 109.5 . . ?
 C30 C35 H35C 109.5 . . ?
 H35A C35 H35B 109.5 . . ?
 H35A C35 H35C 109.5 . . ?
 H35B C35 H35C 109.5 . . ?
 C32 C36 H36A 109.5 . . ?
 C32 C36 H36B 109.5 . . ?
 C32 C36 H36C 109.5 . . ?
 H36A C36 H36B 109.5 . . ?
 H36A C36 H36C 109.5 . . ?
 H36B C36 H36C 109.5 . . ?
 C34 C37 H37A 109.5 . . ?
 C34 C37 H37B 109.5 . . ?
 C34 C37 H37C 109.5 . . ?
 H37A C37 H37B 109.5 . . ?
 H37A C37 H37C 109.5 . . ?
 H37B C37 H37C 109.5 . . ?
 C25 C24 Al1 110.9(5) . . ?
 C25 C24 C26 105.4(7) . . ?
 C26 C24 Al1 105.9(5) . . ?
 C27 C24 Al1 118.5(6) . . ?
 C27 C24 C25 107.9(7) . . ?
 C27 C24 C26 107.4(7) . . ?
 C24 C25 H25A 109.5 . . ?
 C24 C25 H25B 109.5 . . ?
 C24 C25 H25C 109.5 . . ?
 H25A C25 H25B 109.5 . . ?
 H25A C25 H25C 109.5 . . ?
 H25B C25 H25C 109.5 . . ?
 C24 C26 H26A 109.5 . . ?
 C24 C26 H26B 109.5 . . ?
 C24 C26 H26C 109.5 . . ?
 H26A C26 H26B 109.5 . . ?
 H26A C26 H26C 109.5 . . ?
 H26B C26 H26C 109.5 . . ?
 C24 C27 H27A 109.5 . . ?
 C24 C27 H27B 109.5 . . ?
 C24 C27 H27C 109.5 . . ?
 H27A C27 H27B 109.5 . . ?
 H27A C27 H27C 109.5 . . ?
 H27B C27 H27C 109.5 . . ?
 C21 C20 Al1 107.4(5) . . ?
 C21 C20 C23 107.6(7) . . ?
 C23 C20 Al1 116.5(5) . . ?
 C22 C20 Al1 110.5(5) . . ?
 C22 C20 C21 107.0(7) . . ?
 C22 C20 C23 107.4(7) . . ?
 C20 C21 H21A 109.5 . . ?
 C20 C21 H21B 109.5 . . ?
 C20 C21 H21C 109.5 . . ?
 H21A C21 H21B 109.5 . . ?
 H21A C21 H21C 109.5 . . ?
 H21B C21 H21C 109.5 . . ?
 C20 C23 H23A 109.5 . . ?
 C20 C23 H23B 109.5 . . ?
 C20 C23 H23C 109.5 . . ?
 H23A C23 H23B 109.5 . . ?
 H23A C23 H23C 109.5 . . ?
 H23B C23 H23C 109.5 . . ?
 C20 C22 H22A 109.5 . . ?
 C20 C22 H22B 109.5 . . ?
 C20 C22 H22C 109.5 . . ?
 H22A C22 H22B 109.5 . . ?
 H22A C22 H22C 109.5 . . ?
 H22B C22 H22C 109.5 . . ?
 C14 C13 P2 123.0(6) . . ?
 C14 C13 C18 118.1(7) . . ?
 C18 C13 P2 118.7(6) . . ?
 C13 C14 H14 119.7 . . ?
 C15 C14 C13 120.7(8) . . ?
 C15 C14 H14 119.7 . . ?
 C14 C15 H15 118.8 . . ?
 C14 C15 C16 122.3(9) . . ?
 C16 C15 H15 118.8 . . ?
 C15 C16 H16 120.7 . . ?
 C15 C16 C17 118.7(9) . . ?
 C17 C16 H16 120.7 . . ?
 C16 C17 H17 120.3 . . ?
 C18 C17 C16 119.3(9) . . ?
 C18 C17 H17 120.3 . . ?
 C13 C18 H18 119.5 . . ?
 C17 C18 C13 120.9(8) . . ?
 C17 C18 H18 119.5 . . ?
 C6 C1 P2 118.6(6) . . ?
 C6 C1 C2 119.1(8) . . ?
 C2 C1 P2 122.3(6) . . ?
 C1 C6 H6 119.7 . . ?
 C5 C6 C1 120.6(8) . . ?
 C5 C6 H6 119.7 . . ?
 C6 C5 H5 119.8 . . ?
 C4 C5 C6 120.4(9) . . ?
 C4 C5 H5 119.8 . . ?
 C5 C4 H4 120.0 . . ?
 C5 C4 C3 119.9(9) . . ?
 C3 C4 H4 120.0 . . ?
 C4 C3 H3 120.1 . . ?
 C4 C3 C2 119.9(9) . . ?
 C2 C3 H3 120.1 . . ?
 C1 C2 H2 119.9 . . ?
 C3 C2 C1 120.1(9) . . ?
 C3 C2 H2 119.9 . . ?
 C8 C7 P2 121.2(6) . . ?
 C12 C7 P2 120.0(6) . . ?
 C12 C7 C8 118.5(7) . . ?
 C7 C8 H8 119.7 . . ?
 C9 C8 C7 120.6(8) . . ?
 C9 C8 H8 119.7 . . ?
 C8 C9 H9 119.8 . . ?
 C10 C9 C8 120.4(8) . . ?
 C10 C9 H9 119.8 . . ?
 C9 C10 H10 119.6 . . ?
 C9 C10 C11 120.9(8) . . ?
 C11 C10 H10 119.6 . . ?
 C10 C11 H11 120.5 . . ?
 C10 C11 C12 119.0(9) . . ?
 C12 C11 H11 120.5 . . ?
 C7 C12 C11 120.5(8) . . ?
 C7 C12 H12 119.7 . . ?
 C11 C12 H12 119.7 . . ?
 O1 C19 Pt1 119.8(6) . . ?
 O1 C19 O2 127.1(7) . . ?
 O2 C19 Pt1 113.1(5) . . ?
 H10A C108 H10B 108.7 . . ?
 C107 C108 H10A 110.6 . . ?
 C107 C108 H10B 110.6 . . ?
 C107 C108 C109 106(2) . . ?
 C109 C108 H10A 110.6 . . ?
 C109 C108 H10B 110.6 . . ?
 C108 C107 H10C 110.1 . . ?
 C108 C107 H10D 110.1 . . ?
 C108 C107 O5 108(2) . . ?
 H10C C107 H10D 108.4 . . ?
 O5 C107 H10C 110.1 . . ?
 O5 C107 H10D 110.1 . . ?
 C110 O5 C107 105(2) . . ?
 O5 C110 H11A 109.6 . . ?
 O5 C110 H11B 109.6 . . ?
 H11A C110 H11B 108.1 . . ?
 C109 C110 O5 110(2) . . ?
 C109 C110 H11A 109.6 . . ?
 C109 C110 H11B 109.6 . . ?
 C108 C109 H10E 110.4 . . ?
 C108 C109 H10F 110.4 . . ?
 C110 C109 C108 107(2) . . ?
 C110 C109 H10E 110.4 . . ?
 C110 C109 H10F 110.4 . . ?
 H10E C109 H10F 108.6 . . ?

_shelx_res_file
;
TITL rdco2_0m_a.res in P-1
CELL 0.71073 12.5062 18.9753 21.519 97.69 92.244 108.259
ZERR 2 0.0009 0.0013 0.0014 0.002 0.002 0.002
LATT 1
SFAC C H Al O P Pt
UNIT 216 252 4 9 8 4
DELU C108 > C109
DELU C78 > C80'
DELU C74 > C76'
SIMU 0.04 0.08 1.7 C108 > C109
SIMU 0.005 0.01 1.7 C73 C74 > C76'
SIMU 0.005 0.01 1.7 C77 C78 > C80'

L.S. 10
PLAN  20
SIZE 0.04 0.05 0.21
TEMP -80.13
FREE Pt1 C44
BOND $H
fmap 2
acta
MERG 2
SHEL 4 0.85
REM <olex2.extras>
REM <HklSrc "%.\\RDCO2_0m.hkl">
REM </olex2.extras>

WGHT    0.029100   34.430500
FVAR       0.25512   0.56494   0.49800
PT2   6    0.235080    0.228914    0.130998    11.00000    0.02045    0.04374 =
         0.04395    0.01418    0.00794    0.01086
P3    5    0.420290    0.227263    0.138035    11.00000    0.01997    0.03348 =
         0.02910    0.00779    0.00517    0.00735
P4    5    0.047580    0.223513    0.119911    11.00000    0.01979    0.04154 =
         0.04504    0.01521    0.00761    0.01073
AL2   3    0.428603    0.357889    0.257341    11.00000    0.04133    0.04148 =
         0.03523    0.00706    0.00968    0.02206
O3    4    0.253298    0.370266    0.100706    11.00000    0.04460    0.06264 =
         0.07943    0.03337   -0.01386    0.00581
O4    4    0.357884    0.374401    0.187055    11.00000    0.04945    0.04531 =
         0.04665    0.01350    0.00589    0.02290
C81   1    0.480675    0.269868    0.217390    11.00000    0.02421    0.03953 =
         0.02570    0.00983    0.01004    0.00938
C100  1    0.519181    0.224710    0.249976    11.00000    0.02917    0.03753 =
         0.03853    0.00540    0.00606    0.01137
AFIX  43
H100  2    0.512728    0.176245    0.228509    11.00000   -1.20000
AFIX   0
C101  1    0.570144    0.244095    0.315714    11.00000    0.02998    0.04664 =
         0.03655    0.00013    0.00715    0.02016
C106  1    0.634352    0.315422    0.341173    11.00000    0.05197    0.04639 =
         0.03968    0.01039    0.00120    0.01600
AFIX  43
H106  2    0.643856    0.354659    0.316614    11.00000   -1.20000
AFIX   0
C105  1    0.686374    0.332234    0.402276    11.00000    0.06292    0.06227 =
         0.04607   -0.01671   -0.00568    0.02438
AFIX  43
H105  2    0.732213    0.381983    0.418933    11.00000   -1.20000
AFIX   0
C104  1    0.669826    0.274775    0.438305    11.00000    0.07245    0.08096 =
         0.03294    0.00464   -0.00500    0.04108
AFIX  43
H104  2    0.703856    0.284867    0.480180    11.00000   -1.20000
AFIX   0
C103  1    0.604772    0.204255    0.413222    11.00000    0.09732    0.07319 =
         0.04182    0.02015   -0.00371    0.04167
AFIX  43
H103  2    0.592586    0.165264    0.438227    11.00000   -1.20000
AFIX   0
C102  1    0.556112    0.187803    0.352639    11.00000    0.07184    0.04675 =
         0.04782    0.00808   -0.00585    0.02742
AFIX  43
H102  2    0.512544    0.137588    0.335842    11.00000   -1.20000
AFIX   0
C82   1    0.502782    0.272254    0.076610    11.00000    0.03655    0.03498 =
         0.02791    0.00802    0.00796    0.01330
C87   1    0.605947    0.330291    0.087695    11.00000    0.02589    0.03841 =
         0.04157   -0.00448    0.01108    0.00112
C86   1    0.659457    0.357092    0.035356    11.00000    0.03740    0.04087 =
         0.04871    0.01138    0.01491    0.00160
AFIX  43
H86   2    0.728614    0.397503    0.042903    11.00000   -1.20000
AFIX   0
C85   1    0.618226    0.328653   -0.025746    11.00000    0.03804    0.05388 =
         0.03785    0.01638    0.01589    0.02161
C84   1    0.516936    0.270018   -0.036212    11.00000    0.03643    0.05132 =
         0.03485    0.01594    0.00763    0.02224
AFIX  43
H84   2    0.486864    0.248716   -0.078225    11.00000   -1.20000
AFIX   0
C83   1    0.458295    0.241643    0.013399    11.00000    0.03269    0.05112 =
         0.02690    0.00332   -0.00231    0.02213
C90   1    0.671723    0.362825    0.151502    11.00000    0.05181    0.06764 =
         0.04618   -0.00512    0.01981   -0.02303
AFIX 137
H90A  2    0.620240    0.372132    0.182373    11.00000   -1.50000
H90B  2    0.730680    0.410161    0.148334    11.00000   -1.50000
H90C  2    0.706665    0.327162    0.164946    11.00000   -1.50000
AFIX   0
C89   1    0.679616    0.360778   -0.080907    11.00000    0.04992    0.09131 =
         0.06102    0.04255    0.03178    0.02066
AFIX 137
H89A  2    0.719255    0.414620   -0.068440    11.00000   -1.50000
H89B  2    0.624548    0.353187   -0.116875    11.00000   -1.50000
H89C  2    0.734360    0.335098   -0.092730    11.00000   -1.50000
AFIX   0
C88   1    0.350909    0.178681   -0.003570    11.00000    0.03978    0.05524 =
         0.03660    0.00070   -0.00108    0.00789
AFIX 137
H88A  2    0.361083    0.132202    0.006509    11.00000   -1.50000
H88B  2    0.329503    0.172791   -0.048731    11.00000   -1.50000
H88C  2    0.291252    0.189484    0.020309    11.00000   -1.50000
AFIX   0
C91   1    0.421840    0.130037    0.122304    11.00000    0.03077    0.04464 =
         0.03117    0.00754    0.00599    0.01324
C96   1    0.320284    0.069644    0.120142    11.00000    0.02863    0.04360 =
         0.04333    0.01005    0.00708    0.00572
C95   1    0.318591   -0.004344    0.105697    11.00000    0.04355    0.03659 =
         0.05402    0.00388    0.00822    0.01175
AFIX  43
H95   2    0.249366   -0.043878    0.105193    11.00000   -1.20000
AFIX   0
C94   1    0.415028   -0.021640    0.092094    11.00000    0.05729    0.04382 =
         0.04711    0.00794    0.01264    0.01908
C93   1    0.515290    0.036670    0.095229    11.00000    0.04599    0.04337 =
         0.04940    0.00566    0.01113    0.02487
AFIX  43
H93   2    0.582620    0.025301    0.086964    11.00000   -1.20000
AFIX   0
C92   1    0.521221    0.112013    0.110170    11.00000    0.03732    0.04990 =
         0.03158    0.00613    0.00776    0.01984
C99   1    0.209638    0.083254    0.133353    11.00000    0.02390    0.04894 =
         0.08197    0.01571    0.01018    0.00705
AFIX 137
H99A  2    0.214733    0.107764    0.176948    11.00000   -1.50000
H99B  2    0.148232    0.035163    0.126986    11.00000   -1.50000
H99C  2    0.194409    0.115633    0.104668    11.00000   -1.50000
AFIX   0
C98   1    0.411766   -0.101663    0.076932    11.00000    0.08016    0.05608 =
         0.07514    0.00007    0.02396    0.03465
AFIX 137
H98A  2    0.364592   -0.131510    0.105547    11.00000   -1.50000
H98B  2    0.488609   -0.104252    0.081918    11.00000   -1.50000
H98C  2    0.379961   -0.121610    0.033405    11.00000   -1.50000
AFIX   0
C97   1    0.637697    0.170840    0.114147    11.00000    0.02475    0.05847 =
         0.05723    0.00329    0.00539    0.01809
AFIX 137
H97A  2    0.642432    0.198426    0.078421    11.00000   -1.50000
H97B  2    0.695672    0.146020    0.113028    11.00000   -1.50000
H97C  2    0.649910    0.205915    0.153551    11.00000   -1.50000
AFIX   0
C77   1    0.311318    0.314831    0.317051    11.00000    0.05636    0.07853 =
         0.04687    0.02235    0.02438    0.03674
PART 1
C78   1    0.220552    0.348001    0.321202    31.00000    0.05427    0.07858 =
         0.04719    0.02287    0.02301    0.04002
AFIX 137
H78A  2    0.250527    0.399679    0.343389    31.00000   -1.50000
H78B  2    0.160803    0.318449    0.344278    31.00000   -1.50000
H78C  2    0.189424    0.348130    0.278725    31.00000   -1.50000
AFIX   0
C79   1    0.345890    0.303473    0.378574    31.00000    0.06254    0.08655 =
         0.04594    0.02435    0.02564    0.03324
AFIX 137
H79A  2    0.373067    0.260057    0.374514    31.00000   -1.50000
H79B  2    0.281416    0.294322    0.404326    31.00000   -1.50000
H79C  2    0.406701    0.348316    0.398728    31.00000   -1.50000
AFIX   0
C80   1    0.234458    0.227784    0.284524    31.00000    0.06007    0.07597 =
         0.04569    0.02428    0.02899    0.02781
AFIX 137
H80A  2    0.209631    0.227771    0.240758    31.00000   -1.50000
H80B  2    0.168239    0.209999    0.308088    31.00000   -1.50000
H80C  2    0.280371    0.194465    0.285625    31.00000   -1.50000
AFIX   0
PART 0
PART 2
C78'  1    0.223786    0.359949    0.311247   -31.00000    0.05509    0.08093 =
         0.04771    0.02154    0.02681    0.03613
AFIX 137
H78D  2    0.264989    0.413921    0.316805   -31.00000   -1.50000
H78E  2    0.170754    0.349494    0.343779   -31.00000   -1.50000
H78F  2    0.181918    0.344109    0.269595   -31.00000   -1.50000
AFIX   0
C79'  1    0.372827    0.351232    0.389486   -31.00000    0.06476    0.08712 =
         0.04594    0.01991    0.02451    0.03218
AFIX 137
H79D  2    0.441967    0.338096    0.395306   -31.00000   -1.50000
H79E  2    0.320855    0.330983    0.420462   -31.00000   -1.50000
H79F  2    0.391791    0.406000    0.395239   -31.00000   -1.50000
AFIX   0
C80'  1    0.270590    0.235976    0.311284   -31.00000    0.05857    0.07586 =
         0.04736    0.02552    0.02866    0.02947
AFIX 137
H80D  2    0.223084    0.215191    0.271621   -31.00000   -1.50000
H80E  2    0.225843    0.221330    0.346602   -31.00000   -1.50000
H80F  2    0.334490    0.216508    0.311615   -31.00000   -1.50000
AFIX   0
PART 0
C73   1    0.529012    0.465830    0.289292    11.00000    0.06505    0.04269 =
         0.09025   -0.00970   -0.01091    0.02351
PART 1
C74   1    0.445097    0.512170    0.279261    21.00000    0.06353    0.04247 =
         0.09018   -0.00712   -0.00807    0.02337
AFIX 137
H74A  2    0.421740    0.505882    0.234309    21.00000   -1.50000
H74B  2    0.483518    0.565492    0.295022    21.00000   -1.50000
H74C  2    0.378357    0.493673    0.302273    21.00000   -1.50000
AFIX   0
C75   1    0.636322    0.496271    0.268287    21.00000    0.06312    0.04468 =
         0.10069   -0.00944   -0.00128    0.01019
AFIX 137
H75A  2    0.689998    0.476255    0.288257    21.00000   -1.50000
H75B  2    0.661564    0.551077    0.279459    21.00000   -1.50000
H75C  2    0.632317    0.482732    0.222481    21.00000   -1.50000
AFIX   0
C76   1    0.537186    0.477349    0.366997    21.00000    0.07804    0.05250 =
         0.09584   -0.01618   -0.01675    0.02074
AFIX 137
H76A  2    0.462350    0.473133    0.381372    21.00000   -1.50000
H76B  2    0.590212    0.527110    0.383892    21.00000   -1.50000
H76C  2    0.563844    0.438636    0.381824    21.00000   -1.50000
AFIX   0
PART 0
PART 2
C74'  1    0.465630    0.516573    0.301720   -21.00000    0.06313    0.04409 =
         0.09172   -0.00955   -0.00632    0.02125
AFIX 137
H74D  2    0.411957    0.510259    0.265363   -21.00000   -1.50000
H74E  2    0.517336    0.568336    0.309373   -21.00000   -1.50000
H74F  2    0.424245    0.505831    0.338924   -21.00000   -1.50000
AFIX   0
C75'  1    0.606221    0.501281    0.232813   -21.00000    0.07072    0.04515 =
         0.10147   -0.00957    0.00422    0.01188
AFIX 137
H75D  2    0.662872    0.476057    0.224864   -21.00000   -1.50000
H75E  2    0.644260    0.555187    0.246080   -21.00000   -1.50000
H75F  2    0.557028    0.493490    0.194214   -21.00000   -1.50000
AFIX   0
C76'  1    0.619626    0.486568    0.347132   -21.00000    0.07353    0.05123 =
         0.09756   -0.01289   -0.02311    0.01543
AFIX 137
H76D  2    0.585607    0.498779    0.385670   -21.00000   -1.50000
H76E  2    0.683519    0.530073    0.341091   -21.00000   -1.50000
H76F  2    0.646285    0.443789    0.350722   -21.00000   -1.50000
AFIX   0
PART 0
C66   1    0.001640    0.244438    0.045498    11.00000    0.01901    0.05089 =
         0.05350    0.01733    0.00925    0.01001
C71   1   -0.094820    0.259597    0.036740    11.00000    0.04835    0.08646 =
         0.04605    0.01964    0.02112    0.04249
AFIX  43
H71   2   -0.133110    0.267909    0.072875    11.00000   -1.20000
AFIX   0
C70   1   -0.142397    0.264034   -0.020041    11.00000    0.03834    0.07990 =
         0.05361    0.02290    0.01095    0.03174
AFIX  43
H70   2   -0.211236    0.275118   -0.023101    11.00000   -1.20000
AFIX   0
C69   1   -0.088717    0.252176   -0.072169    11.00000    0.03762    0.07841 =
         0.04459    0.01918    0.00239    0.01470
AFIX  43
H69   2   -0.120987    0.253034   -0.112654    11.00000   -1.20000
AFIX   0
C68   1    0.013786    0.238791   -0.065648    11.00000    0.04888    0.12913 =
         0.04085    0.02105    0.01798    0.04827
AFIX  43
H68   2    0.053318    0.231743   -0.101539    11.00000   -1.20000
AFIX   0
C67   1    0.057304    0.235840   -0.007267    11.00000    0.03961    0.09601 =
         0.06114    0.01535    0.01203    0.04388
AFIX  43
H67   2    0.128165    0.227598   -0.003020    11.00000   -1.20000
AFIX   0
C61   1   -0.037999    0.091280    0.171446    11.00000    0.02097    0.04905 =
         0.06229    0.01792    0.00517    0.00476
AFIX  43
H61   2    0.015895    0.116363    0.206134    11.00000   -1.20000
AFIX   0
C62   1   -0.110720    0.019959    0.173400    11.00000    0.04829    0.05774 =
         0.07831    0.03124    0.00855    0.01839
AFIX  43
H62   2   -0.109922   -0.002242    0.210378    11.00000   -1.20000
AFIX   0
C63   1   -0.182567   -0.018134    0.123220    11.00000    0.06966    0.04471 =
         0.07981    0.01218   -0.00790   -0.00073
AFIX  43
H63   2   -0.231999   -0.067271    0.124914    11.00000   -1.20000
AFIX   0
C64   1   -0.185266    0.012918    0.070022    11.00000    0.06787    0.04701 =
         0.07992    0.00011   -0.01781   -0.00585
AFIX  43
H64   2   -0.234138   -0.015546    0.034262    11.00000   -1.20000
AFIX   0
C65   1   -0.116885    0.086239    0.067469    11.00000    0.05239    0.04841 =
         0.05250    0.00496    0.00162    0.01294
AFIX  43
H65   2   -0.121071    0.108137    0.030627    11.00000   -1.20000
AFIX   0
C60   1   -0.042535    0.127153    0.119108    11.00000    0.02538    0.04495 =
         0.05048    0.01129    0.01373    0.01723
C54   1   -0.009171    0.277377    0.179474    11.00000    0.02260    0.03963 =
         0.04543    0.00902   -0.00367    0.00910
C59   1   -0.086019    0.245994    0.219471    11.00000    0.04631    0.04262 =
         0.04676    0.00321    0.00922    0.01052
AFIX  43
H59   2   -0.114566    0.192865    0.216268    11.00000   -1.20000
AFIX   0
C58   1   -0.122578    0.289051    0.263753    11.00000    0.05370    0.05278 =
         0.05187    0.00275    0.01946    0.01591
AFIX  43
H58   2   -0.174042    0.265848    0.292008    11.00000   -1.20000
AFIX   0
C57   1   -0.086401    0.364452    0.267916    11.00000    0.05819    0.04617 =
         0.06662    0.00025    0.01365    0.01286
AFIX  43
H57   2   -0.112794    0.394127    0.298850    11.00000   -1.20000
AFIX   0
C56   1   -0.012771    0.397845    0.228222    11.00000    0.05889    0.03982 =
         0.08605    0.00586    0.01629    0.01470
AFIX  43
H56   2    0.011111    0.450888    0.230368    11.00000   -1.20000
AFIX   0
C55   1    0.027776    0.354621    0.184440    11.00000    0.03580    0.04341 =
         0.07441    0.02160    0.01627    0.00543
AFIX  43
H55   2    0.081619    0.378321    0.157493    11.00000   -1.20000
AFIX   0
C72   1    0.287749    0.338579    0.138603    11.00000    0.01943    0.07353 =
         0.04446    0.03373    0.00886    0.01684

PT1   6    0.360306    0.746932    0.313695    11.00000    0.01455    0.02452 =
         0.02322    0.00402    0.00472    0.00683
P1    5    0.171545    0.687813    0.328033    11.00000    0.01672    0.01899 =
         0.02158    0.00282    0.00669    0.00530
P2    5    0.551276    0.804798    0.305700    11.00000    0.01518    0.02658 =
         0.02775    0.00440    0.00384    0.00589
AL1   3    0.185278    0.866189    0.343969    11.00000    0.02249    0.02415 =
         0.02346    0.00342    0.00368    0.00985
O1    4    0.331314    0.792536    0.197429    11.00000    0.05357    0.04858 =
         0.02349    0.01153    0.01310    0.02415
O2    4    0.261093    0.848130    0.276184    11.00000    0.03372    0.03074 =
         0.02892    0.01240    0.01464    0.01753
C28   1    0.126079    0.760121    0.371970    11.00000    0.02006    0.02368 =
         0.02035   -0.00785   -0.00263    0.00710
C52   1   -0.029345    0.886594    0.513061    11.00000    0.05715    0.03624 =
         0.09671    0.01006    0.04276    0.02509
AFIX  43
H52   2   -0.057622    0.925375    0.503850    11.00000   -1.20000
AFIX   0
C47   1    0.091370    0.743742    0.429015    11.00000    0.01595    0.02274 =
         0.03316    0.00722    0.01163    0.00455
AFIX  43
H47   2    0.092404    0.696445    0.438437    11.00000   -1.20000
AFIX   0
C49   1    0.051534    0.773317    0.539388    11.00000    0.03663    0.03790 =
         0.03558   -0.00073    0.01090    0.00609
AFIX  43
H49   2    0.078105    0.733886    0.548813    11.00000   -1.20000
AFIX   0
C48   1    0.052348    0.789629    0.478182    11.00000    0.02655    0.02577 =
         0.02863   -0.00257    0.01582    0.00400
C38   1    0.163194    0.610885    0.373302    11.00000    0.02705    0.01950 =
         0.02295    0.00344    0.00734    0.00646
C53   1    0.009574    0.846503    0.466171    11.00000    0.04394    0.04219 =
         0.05518    0.00752    0.02568    0.01955
AFIX  43
H53   2    0.007194    0.857918    0.424584    11.00000   -1.20000
AFIX   0
C51   1   -0.026918    0.869852    0.573980    11.00000    0.04840    0.04670 =
         0.07151   -0.01468    0.04034   -0.00161
AFIX  43
H51   2   -0.052820    0.897617    0.606654    11.00000   -1.20000
AFIX   0
C50   1    0.012713    0.813482    0.586840    11.00000    0.04782    0.06157 =
         0.03835   -0.00974    0.02921    0.00119
AFIX  43
H50   2    0.013664    0.801792    0.628386    11.00000   -1.20000
AFIX   0
C43   1    0.059469    0.555960    0.381623    11.00000    0.02919    0.02588 =
         0.02830    0.00260    0.01477    0.00763
C42   1    0.060187    0.499877    0.417210    11.00000    0.03820    0.02686 =
         0.03873    0.00694    0.01785    0.00699
AFIX  43
H42   2   -0.009660    0.463604    0.422573    11.00000   -1.20000
AFIX   0
C41   1    0.158512    0.495031    0.444956    11.00000    0.06158    0.02695 =
         0.02990    0.01106    0.02439    0.02316
C40   1    0.259261    0.548629    0.437030    11.00000    0.03803    0.04366 =
         0.03139    0.00723    0.00826    0.02572
AFIX  43
H40   2    0.327524    0.546060    0.456033    11.00000   -1.20000
AFIX   0
C39   1    0.264399    0.606348    0.402160    11.00000    0.03445    0.02746 =
         0.02386    0.00638    0.01224    0.01631
C46   1   -0.052628    0.556903    0.355951    11.00000    0.03028    0.03008 =
         0.04286    0.00580    0.01412    0.00227
AFIX 137
H46A  2   -0.112987    0.519013    0.372372    11.00000   -1.50000
H46B  2   -0.058729    0.545648    0.309907    11.00000   -1.50000
H46C  2   -0.059757    0.606668    0.368721    11.00000   -1.50000
AFIX   0
C45   1    0.156734    0.432032    0.483552    11.00000    0.07439    0.04250 =
         0.04910    0.02621    0.02400    0.03028
AFIX 137
H45A  2    0.114401    0.436659    0.520408    11.00000   -1.50000
H45B  2    0.234362    0.436209    0.497400    11.00000   -1.50000
H45C  2    0.120308    0.383124    0.457418    11.00000   -1.50000
AFIX   0
C44   1    0.378108    0.660724    0.397521    11.00000    0.03149    0.04079 =
         0.03956    0.01843    0.00523    0.01635
AFIX 137
H44A  2    0.433537    0.652515    0.426760    11.00000   -1.50000
H44B  2    0.375950    0.712072    0.408312    11.00000   -1.50000
H44C  2    0.399693    0.653381    0.354438    11.00000   -1.50000
AFIX   0
C29   1    0.085730    0.644448    0.253513    11.00000    0.01865    0.02078 =
         0.02314    0.00835    0.00768    0.00103
C30   1    0.126203    0.596126    0.211535    11.00000    0.02194    0.02899 =
         0.02600    0.00212    0.00947    0.00479
C31   1    0.069147    0.564941    0.152453    11.00000    0.02936    0.03669 =
         0.03707   -0.00161    0.01295    0.00188
AFIX  43
H31   2    0.098864    0.534120    0.124458    11.00000   -1.20000
AFIX   0
C32   1   -0.029616    0.577377    0.133117    11.00000    0.03015    0.04550 =
         0.02455    0.00042   -0.00006   -0.00525
C33   1   -0.071045    0.621885    0.175080    11.00000    0.02767    0.04310 =
         0.03658    0.00670   -0.00254    0.00589
AFIX  43
H33   2   -0.138780    0.630748    0.162514    11.00000   -1.20000
AFIX   0
C34   1   -0.018412    0.654503    0.235022    11.00000    0.02278    0.03170 =
         0.03148    0.00589    0.00731    0.00319
C35   1    0.230626    0.575640    0.227230    11.00000    0.03405    0.03668 =
         0.03838   -0.00382    0.01290    0.01238
AFIX 137
H35A  2    0.239347    0.538786    0.192977    11.00000   -1.50000
H35B  2    0.222930    0.554066    0.266376    11.00000   -1.50000
H35C  2    0.297235    0.620801    0.232504    11.00000   -1.50000
AFIX   0
C36   1   -0.087053    0.545769    0.067500    11.00000    0.06191    0.08170 =
         0.04064   -0.00830   -0.01048    0.00324
AFIX 137
H36A  2   -0.163887    0.548799    0.065759    11.00000   -1.50000
H36B  2   -0.090404    0.493186    0.057182    11.00000   -1.50000
H36C  2   -0.044038    0.574868    0.037098    11.00000   -1.50000
AFIX   0
C37   1   -0.082657    0.694682    0.276346    11.00000    0.02328    0.03871 =
         0.04736    0.00593    0.00493    0.01271
AFIX 137
H37A  2   -0.128883    0.714342    0.250018    11.00000   -1.50000
H37B  2   -0.029138    0.736314    0.305104    11.00000   -1.50000
H37C  2   -0.131684    0.659492    0.300760    11.00000   -1.50000
AFIX   0
C24   1    0.083784    0.912716    0.298450    11.00000    0.03247    0.03140 =
         0.03993    0.00656    0.00216    0.01561
C25   1    0.048828    0.872570    0.229985    11.00000    0.04827    0.07160 =
         0.03938    0.00388   -0.00768    0.03097
AFIX 137
H25A  2    0.005807    0.819624    0.230026    11.00000   -1.50000
H25B  2    0.116627    0.876068    0.207612    11.00000   -1.50000
H25C  2    0.001857    0.896529    0.208849    11.00000   -1.50000
AFIX   0
C26   1    0.159264    0.993915    0.293175    11.00000    0.04996    0.04624 =
         0.06406    0.02035   -0.00035    0.02172
AFIX 137
H26A  2    0.113879    1.019825    0.273228    11.00000   -1.50000
H26B  2    0.221697    0.991778    0.267652    11.00000   -1.50000
H26C  2    0.189750    1.021277    0.335323    11.00000   -1.50000
AFIX   0
C27   1   -0.023343    0.918478    0.328317    11.00000    0.05108    0.06595 =
         0.05910    0.01638    0.00781    0.04252
AFIX 137
H27A  2   -0.063921    0.940988    0.301179    11.00000   -1.50000
H27B  2   -0.002256    0.949936    0.369724    11.00000   -1.50000
H27C  2   -0.072187    0.868184    0.333101    11.00000   -1.50000
AFIX   0
C20   1    0.299878    0.936013    0.412809    11.00000    0.02518    0.02025 =
         0.03017    0.00196    0.00438    0.00687
C21   1    0.397226    0.985465    0.380416    11.00000    0.03100    0.04597 =
         0.05351    0.00035   -0.00098   -0.00622
AFIX 137
H21A  2    0.459883    1.013768    0.411964    11.00000   -1.50000
H21B  2    0.370521    1.020537    0.359689    11.00000   -1.50000
H21C  2    0.423188    0.953543    0.348992    11.00000   -1.50000
AFIX   0
C23   1    0.256787    0.989013    0.458945    11.00000    0.05764    0.04511 =
         0.04055   -0.01820   -0.00162    0.01757
AFIX 137
H23A  2    0.193657    0.959077    0.479717    11.00000   -1.50000
H23B  2    0.231284    1.022578    0.435587    11.00000   -1.50000
H23C  2    0.318172    1.018901    0.490703    11.00000   -1.50000
AFIX   0
C22   1    0.350372    0.891187    0.452105    11.00000    0.04391    0.04505 =
         0.05243    0.00748   -0.02342    0.01240
AFIX 137
H22A  2    0.377390    0.856385    0.424201    11.00000   -1.50000
H22B  2    0.292477    0.862717    0.476802    11.00000   -1.50000
H22C  2    0.413706    0.925646    0.480571    11.00000   -1.50000
AFIX   0
C13   1    0.627560    0.783081    0.370137    11.00000    0.01093    0.03169 =
         0.03054    0.00878    0.00070   -0.00129
C14   1    0.692956    0.736507    0.361214    11.00000    0.02938    0.05174 =
         0.03472    0.01542    0.00210    0.01720
AFIX  43
H14   2    0.703396    0.717093    0.319687    11.00000   -1.20000
AFIX   0
C15   1    0.742082    0.718319    0.410745    11.00000    0.04000    0.06096 =
         0.05287    0.01738    0.01088    0.02447
AFIX  43
H15   2    0.787836    0.686968    0.403181    11.00000   -1.20000
AFIX   0
C16   1    0.728336    0.743557    0.471952    11.00000    0.04133    0.06936 =
         0.05749    0.02025   -0.00693    0.01952
AFIX  43
H16   2    0.763353    0.729523    0.506087    11.00000   -1.20000
AFIX   0
C17   1    0.662092    0.790058    0.482836    11.00000    0.03423    0.06471 =
         0.03404    0.00278    0.00246    0.00572
AFIX  43
H17   2    0.651931    0.808700    0.524640    11.00000   -1.20000
AFIX   0
C18   1    0.611167    0.808859    0.432102    11.00000    0.02912    0.04545 =
         0.03612    0.00361    0.00109    0.00705
AFIX  43
H18   2    0.564486    0.839633    0.439342    11.00000   -1.20000
AFIX   0
C1    1    0.606901    0.905503    0.306661    11.00000    0.01828    0.03001 =
         0.03963    0.00280    0.01220    0.00577
C6    1    0.568208    0.936154    0.258962    11.00000    0.03542    0.03323 =
         0.04038    0.01085    0.00689    0.00395
AFIX  43
H6    2    0.511837    0.904566    0.227557    11.00000   -1.20000
AFIX   0
C5    1    0.610640    1.011726    0.256730    11.00000    0.05698    0.04755 =
         0.06018    0.01794    0.01575    0.02297
AFIX  43
H5    2    0.584144    1.031971    0.223528    11.00000   -1.20000
AFIX   0
C4    1    0.691132    1.058222    0.302187    11.00000    0.05255    0.03293 =
         0.08707    0.01160    0.02076    0.00325
AFIX  43
H4    2    0.719724    1.110552    0.300611    11.00000   -1.20000
AFIX   0
C3    1    0.730592    1.028817    0.350302    11.00000    0.04353    0.03261 =
         0.07320   -0.00342   -0.00229   -0.00189
AFIX  43
H3    2    0.786251    1.060916    0.381827    11.00000   -1.20000
AFIX   0
C2    1    0.688723    0.952381    0.352417    11.00000    0.03432    0.03862 =
         0.05648    0.00836    0.00221    0.00816
AFIX  43
H2    2    0.716141    0.932084    0.385275    11.00000   -1.20000
AFIX   0
C7    1    0.605023    0.767188    0.235929    11.00000    0.01808    0.04242 =
         0.02268    0.01147    0.00889    0.01585
C8    1    0.702254    0.809936    0.211823    11.00000    0.03004    0.05453 =
         0.03278    0.00398    0.00572    0.00913
AFIX  43
H8    2    0.738738    0.860642    0.230498    11.00000   -1.20000
AFIX   0
C9    1    0.745658    0.779257    0.161270    11.00000    0.02825    0.05969 =
         0.03964    0.00433    0.00769    0.02098
AFIX  43
H9    2    0.810938    0.809202    0.144718    11.00000   -1.20000
AFIX   0
C10   1    0.696460    0.707450    0.135253    11.00000    0.03871    0.07724 =
         0.03398    0.00372    0.01052    0.03475
AFIX  43
H10   2    0.725794    0.687389    0.099504    11.00000   -1.20000
AFIX   0
C11   1    0.604433    0.662554    0.159489    11.00000    0.05575    0.05428 =
         0.04430   -0.01137    0.00234    0.02119
AFIX  43
H11   2    0.573124    0.610759    0.142705    11.00000   -1.20000
AFIX   0
C12   1    0.556800    0.694313    0.209727    11.00000    0.02586    0.03731 =
         0.04014   -0.00080    0.01014    0.00506
AFIX  43
H12   2    0.490378    0.664386    0.225328    11.00000   -1.20000
AFIX   0
C19   1    0.311329    0.802731    0.251421    11.00000    0.02705    0.02745 =
         0.02767    0.00569    0.00081   -0.00020

SAME 0.02 0.04 C109 < C108
PART -1
C108  1    0.444973    0.466418   -0.003654    10.50000    0.06998    0.11882 =
         0.08141    0.00393    0.00054    0.00919
AFIX  23
H10A  2    0.368244    0.470997   -0.005498    10.50000   -1.20000
H10B  2    0.439896    0.415052   -0.023179    10.50000   -1.20000
AFIX   0
C107  1    0.491765    0.481206    0.058425    10.50000    0.05987    0.06377 =
         0.07534   -0.00008    0.01785    0.02000
AFIX  23
H10C  2    0.482872    0.433548    0.074821    10.50000   -1.20000
H10D  2    0.453005    0.510456    0.085210    10.50000   -1.20000
AFIX   0
O5    4    0.607997    0.522761    0.059415    10.50000    0.05822    0.08316 =
         0.06541    0.02549    0.01492    0.01132
C110  1    0.618500    0.551553    0.002651    10.50000    0.10090    0.14478 =
         0.04901    0.02660   -0.00293   -0.01557
AFIX  23
H11A  2    0.637562    0.606858    0.011191    10.50000   -1.20000
H11B  2    0.680472    0.539705   -0.019118    10.50000   -1.20000
AFIX   0
C109  1    0.518954    0.520973   -0.035303    10.50000    0.10398    0.15225 =
         0.07664    0.02679   -0.01606   -0.00654
AFIX  23
H10E  2    0.532693    0.497092   -0.076670    10.50000   -1.20000
H10F  2    0.485448    0.560443   -0.042206    10.50000   -1.20000
AFIX   0
HKLF 4

REM  rdco2_0m_a.res in P-1
REM R1 =  0.0478 for   12610 Fo > 4sig(Fo)  and  0.0700 for all   16171 data
REM   1194 parameters refined using    152 restraints

END

WGHT      0.0208     36.0255

REM Highest difference peak  1.554,  deepest hole -2.291,  1-sigma level  0.128
Q1    1   0.3770  0.7371  0.3365  11.00000  0.05    1.55
Q2    1   0.3363  0.7145  0.3076  11.00000  0.05    1.42
Q3    1   0.3464  0.7589  0.2936  11.00000  0.05    1.30
Q4    1   0.3408  0.7558  0.3284  11.00000  0.05    1.26
Q5    1   0.3961  0.7670  0.3191  11.00000  0.05    1.25
Q6    1   0.3746  0.7361  0.2956  11.00000  0.05    1.25
Q7    1   0.2618  0.2859  0.1006  11.00000  0.05    0.96
Q8    1   0.2990  0.2936  0.1608  11.00000  0.05    0.91
Q9    1   0.1776  0.1964  0.0799  11.00000  0.05    0.88
Q10   1   0.1730  0.1774  0.0964  11.00000  0.05    0.88
Q11   1   0.2093  0.2803  0.1664  11.00000  0.05    0.86
Q12   1   0.2751  0.2196  0.1795  11.00000  0.05    0.86
Q13   1   0.2019  0.2544  0.0892  11.00000  0.05    0.79
Q14   1   0.1986  0.2141  0.0728  11.00000  0.05    0.78
Q15   1   0.1696  0.6540  0.3379  11.00000  0.05    0.63
Q16   1   0.2781  0.2398  0.0757  11.00000  0.05    0.60
Q17   1   0.1674  0.7171  0.3485  11.00000  0.05    0.59
Q18   1   0.5180  0.7070  0.1794  11.00000  0.05    0.58
Q19   1   0.1989  0.1573  0.1385  11.00000  0.05    0.56
Q20   1   0.1834  0.2820  0.1200  11.00000  0.05    0.56
;
_shelx_res_checksum               41687
_shelx_hkl_file
;
  -1   0   0   -0.60    1.40
  -1   0   0    0.10    1.70
  -1   0   0    0.00    1.20
  -1   0   0    0.50    1.30
  -1   0   0    0.20    2.00
   1   0   0   -0.10    1.30
   1   0   0    1.50    1.40
   1   0   0   -0.40    2.00
   1   0   0   -0.50    1.20
   1   0   0   -0.90    1.70
   1   0   0   -1.10    1.10
  -2   0   0    9.90    4.10
  -2   0   0   19.50    7.50
  -2   0   0    2.20    4.20
  -2   0   0   -4.30    3.30
  -2   0   0    5.30    4.90
  -2   0   0    9.90    6.70
   2   0   0    7.20    3.80
   2   0   0    0.90    4.40
   2   0   0    1.10    5.20
   2   0   0   -0.60    4.30
   2   0   0    3.70    4.00
   2   0   0   14.90    6.60
  -3   0   0 5287.47  219.28
  -3   0   0 5745.23  221.18
  -3   0   0 5758.22  219.68
  -3   0   0 5671.43  215.08
  -3   0   0 5857.81  220.78
   3   0   0 5848.11  220.98
   3   0   0 5768.62  220.98
   3   0   0 5497.25  219.68
   3   0   0 5439.96  219.68
   3   0   0 5652.73  214.38
  -4   0   0   95.19   17.40
  -4   0   0   70.49   16.10
  -4   0   0  115.09   19.20
  -4   0   0   74.19   13.30
  -4   0   0  113.39   19.90
   4   0   0   93.39   16.90
   4   0   0   85.59   17.70
   4   0   0   91.89   17.20
   4   0   0   70.09   17.70
   4   0   0   89.79   12.80
  -5   0   0  693.53   37.40
  -5   0   0  617.94   43.90
  -5   0   0  658.13   45.10
  -5   0   0  629.14   43.00
  -5   0   0  690.23   46.30
   5   0   0  696.83   45.30
   5   0   0  692.23   45.50
   5   0   0  705.93   36.10
   5   0   0  654.33   45.50
   5   0   0  680.03   45.40
  -6   0   0  161.48   27.30
  -6   0   0  178.28   21.50
  -6   0   0  130.29   25.30
   6   0   0  155.98   18.50
   6   0   0  149.99   26.40
   6   0   0  144.39   28.50
  -7   0   0 1418.96   66.19
  -7   0   0 1416.86   79.39
  -7   0   0 1267.77   75.39
   7   0   0 1328.27   62.69
   7   0   0 1331.37   78.09
   7   0   0 1351.46   76.19
  -8   0   0  613.54   52.69
  -8   0   0  632.84   40.00
  -8   0   0  650.63   61.59
   8   0   0  670.03   56.79
   8   0   0  599.24   37.20
   8   0   0  602.44   52.39
  -9   0   0  124.89   32.60
  -9   0   0  135.29   32.70
   9   0   0  143.79   35.00
   9   0   0   86.59   28.30
 -10   0   0  980.10   54.99
 -10   0   0  823.92   70.79
 -10   0   0  873.11   72.99
  10   0   0  852.11   70.79
  10   0   0  908.31   75.39
 -11   0   0   34.10   33.50
 -11   0   0   35.40   16.60
 -11   0   0  -29.00   23.90
  11   0   0   19.80   27.70
  11   0   0    5.40   30.00
 -12   0   0  -12.50   29.00
 -12   0   0   24.70   31.60
 -12   0   0   29.30   17.70
  12   0   0   25.00   39.60
  12   0   0    5.40   32.70
 -13   0   0   61.69   36.10
 -13   0   0    4.10   33.40
  13   0   0   77.49   41.00
  13   0   0    1.30   39.90
 -14   0   0   10.40   40.90
  14   0   0   57.59   40.00
  14   0   0   53.19   46.50
 -15   0   0  598.34   84.79
  15   0   0  452.15   80.69
  15   0   0  362.46   64.69
  15  -1   0   59.09   43.80
  15  -1   0  -21.90   47.80
 -15   1   0  155.18   53.49
  14  -1   0   -1.80   31.70
  14  -1   0  -50.89   36.30
 -14   1   0   52.89   37.10
 -14   1   0   81.09   46.20
  13  -1   0   74.49   45.20
  13  -1   0   78.39   38.80
 -13   1   0   92.29   39.90
 -13   1   0  117.19   46.60
  12  -1   0  868.11   86.39
  12  -1   0  837.72   83.99
 -12   1   0  833.12   84.59
 -12   1   0  961.80   58.79
 -12   1   0  938.31   82.49
  11  -1   0  180.18   44.60
  11  -1   0   77.69   35.70
 -11   1   0  199.48   43.40
 -11   1   0   97.19   36.10
  10  -1   0 1784.52   81.49
  10  -1   0 1733.53  101.79
  10  -1   0 1570.04  100.59
 -10   1   0 1681.03  104.59
 -10   1   0 1738.93  103.49
   9  -1   0   49.80   26.80
   9  -1   0   46.00   15.50
   9  -1   0   55.39   23.90
  -9   1   0  -10.90   19.00
  -9   1   0   35.70   25.70
   8  -1   0   56.29   25.00
   8  -1   0   63.99   26.10
   8  -1   0   74.29   17.00
  -8   1   0   42.90   22.00
  -8   1   0   98.09   27.80
   7  -1   0   85.79   26.30
   7  -1   0  128.09   19.20
   7  -1   0  119.39   26.70
  -7   1   0   78.29   23.20
  -7   1   0   44.70   20.90
   6  -1   0   90.29   23.10
   6  -1   0   80.09   15.90
   6  -1   0   59.89   20.00
  -6   1   0   60.69   20.10
  -6   1   0   81.39   15.70
  -6   1   0   39.30   16.60
  -6   1   0   88.69   23.30
   5  -1   0 9693.93  369.96
   5  -1   0 9356.06  372.26
   5  -1   0 9999.00  364.06
   5  -1   0 9390.06  370.86
   5  -1   0 9144.79  371.16
  -5   1   0 9836.02  374.46
  -5   1   0 9388.06  371.56
  -5   1   0 9639.34  361.06
  -5   1   0 9385.36  371.66
  -5   1   0 9441.76  368.86
  -5   1   0 9781.52  364.26
   4  -1   0  588.44   37.90
   4  -1   0  633.04   33.20
   4  -1   0  559.44   37.80
   4  -1   0  599.04   38.40
   4  -1   0  615.34   36.90
  -4   1   0  601.24   30.90
  -4   1   0  623.84   38.30
  -4   1   0  548.35   38.90
  -4   1   0  613.54   38.60
  -4   1   0  558.94   34.60
  -4   1   0  552.34   32.30
   3  -1   0 2941.11  119.89
   3  -1   0 2432.06  117.19
   3  -1   0 3017.10  119.29
   3  -1   0 3206.28  115.89
  -3   1   0 2837.82  119.89
  -3   1   0 3088.89  117.09
  -3   1   0 3046.40  115.29
  -3   1   0 3035.60  119.19
  -3   1   0 2353.56  116.99
  -3   1   0 3046.90  113.59
   2  -1   0    2.70    4.70
   2  -1   0    4.60    3.90
   2  -1   0   -5.20    3.80
   2  -1   0   -2.00    3.70
   2  -1   0    0.80    4.90
  -2   1   0   -1.20    4.80
  -2   1   0   -0.20    4.10
  -2   1   0    2.60    4.80
  -2   1   0    4.30    4.70
  -2   1   0   -6.30    3.80
   1  -1   0   -2.60    1.70
   1  -1   0    1.50    1.80
   1  -1   0   -1.50    1.80
   1  -1   0   -0.90    1.10
   1  -1   0    1.00    1.40
  -1   1   0   -1.00    1.40
  -1   1   0    0.10    1.80
  -1   1   0    1.20    1.80
  -1   1   0    0.20    1.50
  -1   1   0    2.30    1.70
   0  -1   0   -0.20    0.60
   0  -1   0    0.00    0.50
   0  -1   0    0.00    0.30
   0  -1   0    0.70    0.70
   0  -1   0    0.40    0.50
   0   1   0   -0.10    0.30
   0   1   0    0.60    0.50
   0   1   0    0.30    0.70
   0   1   0   -0.20    0.70
  -1  -1   0   -3.20    1.30
  -1  -1   0    0.10    2.40
  -1  -1   0   -4.20    2.70
  -1  -1   0   -0.10    2.60
   1   1   0   -5.80    2.00
   1   1   0   -1.40    3.00
   1   1   0   -5.30    1.60
   1   1   0   -2.50    2.50
   1   1   0   -4.10    1.90
   2   1   0  275.57   19.20
  -3  -1   0 3731.73  151.08
  -3  -1   0 3770.72  145.29
  -3  -1   0 3762.82  145.19
  -3  -1   0 3919.21  152.18
  -3  -1   0 3751.22  152.38
  -3  -1   0 3740.53  151.58
   3   1   0 3611.04  150.58
   3   1   0 3810.52  153.18
   3   1   0 3832.82  151.68
   3   1   0 3802.82  151.68
  -4  -1   0 1930.31   87.29
  -4  -1   0 1940.61   87.49
  -4  -1   0 1970.50   79.59
  -4  -1   0 1855.61   86.39
  -4  -1   0 1818.52   87.09
   4   1   0 1897.11   86.29
   4   1   0 1887.41   87.39
   4   1   0 1917.61   89.09
   4   1   0 1957.20   87.79
  -5  -1   0 5825.72  233.88
  -5  -1   0 5629.04  225.28
  -5  -1   0 5611.14  224.28
  -5  -1   0 5438.46  214.78
  -5  -1   0 5376.96  225.18
   5   1   0 5260.97  224.58
   5   1   0 5480.65  223.38
   5   1   0 5639.24  232.88
   5   1   0 5615.74  226.68
  -6  -1   0  135.89   25.50
  -6  -1   0   98.89   22.00
  -6  -1   0  159.68   20.00
   6   1   0  172.68   28.50
   6   1   0  142.59   29.60
  -7  -1   0  308.17   37.80
  -7  -1   0  326.27   27.90
  -7  -1   0  440.66   46.80
  -7  -1   0  388.06   29.10
   7   1   0  461.95   47.60
   7   1   0  358.56   44.10
  -8  -1   0  209.68   36.40
  -8  -1   0  156.18   32.20
  -8  -1   0  145.79   22.70
  -8  -1   0  180.18   23.70
   8   1   0  128.19   34.60
   8   1   0  204.38   36.20
  -9  -1   0  139.69   23.30
  -9  -1   0  174.58   36.30
  -9  -1   0  150.88   35.00
  -9  -1   0  134.49   22.50
   9   1   0  137.59   34.10
   9   1   0  177.08   39.30
 -10  -1   0  874.71   72.19
 -10  -1   0  922.61   73.89
 -10  -1   0  852.71   52.39
  10   1   0  856.41   71.09
  10   1   0  887.11   75.89
 -11  -1   0   12.70   27.70
 -11  -1   0    8.70   29.90
 -11  -1   0   -0.30   16.30
  11   1   0   56.09   30.30
  11   1   0   -8.60   32.70
 -12  -1   0  640.44   48.20
 -12  -1   0  726.63   75.59
  12   1   0  642.84   82.49
  12   1   0  518.05   65.69
 -13  -1   0  193.38   50.19
  13   1   0  129.99   52.69
  13   1   0  169.88   51.29
 -14  -1   0  135.69   51.89
  14   1   0   81.89   51.09
  14   1   0   46.30   39.60
 -15  -1   0   24.80   48.90
 -15  -1   0   88.79   52.79
  15   1   0   32.30   53.79
  15   1   0   93.09   48.10
  15   1   0   16.00   53.99
  16  -2   0   12.60   39.40
  15  -2   0  424.06   76.59
  15  -2   0  370.76   73.39
 -15   2   0  372.76   69.29
 -15   2   0  420.76   70.19
  14  -2   0   16.90   35.30
  14  -2   0  -35.30   38.20
 -14   2   0   -3.20   36.70
 -14   2   0   23.00   35.50
  13  -2   0   10.90   35.30
  13  -2   0  -48.30   31.10
 -13   2   0    0.30   35.20
 -13   2   0   23.10   33.10
  12  -2   0   63.49   34.50
  12  -2   0   17.80   31.90
 -12   2   0  120.99   42.50
 -12   2   0   14.40   29.50
  11  -2   0   66.39   33.00
  11  -2   0   69.29   34.40
  11  -2   0  117.09   24.00
 -11   2   0  124.79   37.60
 -11   2   0  128.29   40.20
  10  -2   0 1048.80   61.39
  10  -2   0 1140.29   79.39
  10  -2   0 1169.18   81.19
 -10   2   0 1288.97   85.39
 -10   2   0 1128.49   80.99
   9  -2   0  301.77   41.80
   9  -2   0  217.18   28.40
   9  -2   0  216.98   38.50
  -9   2   0  219.68   40.20
  -9   2   0  218.98   39.20
   8  -2   0 1599.04   88.79
   8  -2   0 1701.83   79.99
   8  -2   0 1749.82   92.89
  -8   2   0 1568.34   91.19
  -8   2   0 1731.53   95.89
   7  -2   0  937.61   52.49
   7  -2   0  942.71   61.49
   7  -2   0  975.50   59.29
  -7   2   0  969.90   62.19
  -7   2   0 1046.30   65.79
  -7   2   0  918.31   49.00
   6  -2   0   95.89   19.10
   6  -2   0   93.99   22.90
   6  -2   0   59.69   19.90
  -6   2   0   97.99   25.00
  -6   2   0   97.19   23.30
  -6   2   0  123.49   18.20
  -6   2   0   95.39   19.80
   5  -2   0  595.74   44.10
   5  -2   0  676.13   45.10
   5  -2   0  705.33   41.00
   5  -2   0  707.53   42.90
   5  -2   0  778.92   47.20
  -5   2   0  697.43   45.20
  -5   2   0  677.83   40.70
  -5   2   0  632.94   45.20
  -5   2   0  713.93   47.80
  -5   2   0  744.63   38.60
   4  -2   0    4.10   11.30
   4  -2   0   20.20   12.20
   4  -2   0   20.90   11.90
   4  -2   0   32.00   11.70
   4  -2   0    2.80   11.10
  -4   2   0    3.00    8.90
  -4   2   0    0.80   11.50
  -4   2   0   18.50   12.50
  -4   2   0   11.30   10.00
  -4   2   0   13.00   12.10
   3  -2   0 3483.65  130.29
   3  -2   0 2727.33  128.19
   3  -2   0 3484.95  131.69
   3  -2   0 2708.03  124.89
   3  -2   0 3625.34  128.99
  -3   2   0 3176.98  130.99
  -3   2   0 3370.96  125.79
  -3   2   0 3389.36  129.89
  -3   2   0 2862.41  128.89
   2  -2   0   58.09   10.50
   2  -2   0  105.59   12.30
  -2   2   0  141.39   14.00
   1  -2   0    0.90    2.20
   1  -2   0   -2.30    2.40
   1  -2   0   -3.30    2.60
   1  -2   0    1.70    2.40
   1  -2   0    4.80    3.10
  -1   2   0   -2.10    2.00
  -1   2   0   -2.10    2.10
  -1   2   0   -1.70    2.50
  -1   2   0   -0.10    2.30
  -1   2   0    0.90    2.40
   0  -2   0  -12.90    3.10
   0  -2   0  -12.20    2.00
   0  -2   0  -12.60    2.50
   0  -2   0  -11.90    1.90
   0  -2   0  -13.80    2.40
   0   2   0  -15.80    2.30
   0   2   0  -14.30    2.50
   0   2   0  -13.90    1.60
   0   2   0  -12.10    2.40
  -1  -2   0    0.90    5.20
  -1  -2   0    2.40    3.30
  -1  -2   0   -3.20    2.80
  -1  -2   0   -2.60    2.60
  -1  -2   0    1.80    3.60
   1   2   0   -3.10    4.70
   1   2   0   -6.30    3.90
   1   2   0    4.30    3.40
   1   2   0    7.20    4.30
  -2  -2   0  965.60   47.30
  -2  -2   0  940.51   43.90
   2   2   0  897.81   43.30
   2   2   0  884.31   43.40
   2   2   0  930.21   39.80
  -3  -2   0 1170.78   49.50
  -3  -2   0 1150.08   55.59
  -3  -2   0 1155.28   55.29
  -3  -2   0 1183.48   58.69
  -3  -2   0 1217.68   49.99
  -3  -2   0 1094.79   54.49
   3   2   0 1161.78   55.59
   3   2   0 1151.58   55.99
   3   2   0 1175.08   59.89
   3   2   0 1072.99   49.10
   3   2   0 1115.09   55.39
  -4  -2   0  146.29   23.00
  -4  -2   0  161.38   22.70
  -4  -2   0  196.78   18.10
  -4  -2   0  127.49   20.00
  -4  -2   0  178.18   17.00
  -4  -2   0  199.18   24.60
   4   2   0  233.98   26.20
   4   2   0  168.78   23.10
   4   2   0  158.58   26.00
   4   2   0  161.18   22.10
   4   2   0  167.88   16.30
  -5  -2   0  186.38   20.10
  -5  -2   0  204.18   27.40
  -5  -2   0  195.98   27.30
  -5  -2   0  203.28   20.30
   5   2   0  231.38   30.60
   5   2   0  283.47   48.70
   5   2   0  191.58   31.10
  -6  -2   0   49.20   13.60
  -6  -2   0   15.00   16.30
  -6  -2   0   18.60   11.50
  -6  -2   0   43.30   17.90
   6   2   0   34.90   17.70
   6   2   0   11.10   21.20
  -7  -2   0 1751.82   79.69
  -7  -2   0 1680.33   78.59
  -7  -2   0 1675.43   91.09
  -7  -2   0 1826.62   94.09
   7   2   0 1699.83   97.29
   7   2   0 1895.91   92.79
  -8  -2   0  670.13   61.29
  -8  -2   0  554.14   55.79
  -8  -2   0  482.55   35.50
  -8  -2   0  508.65   35.50
   8   2   0  609.84   55.89
   8   2   0  607.64   66.09
  -9  -2   0  458.95   36.50
  -9  -2   0  494.85   56.69
  -9  -2   0  531.85   56.89
  -9  -2   0  501.95   37.00
   9   2   0  584.64   61.69
   9   2   0  514.25   64.09
 -10  -2   0  574.94   65.79
 -10  -2   0  516.05   40.90
  10   2   0  603.34   74.29
  10   2   0  577.74   64.19
 -11  -2   0   36.50   33.40
 -11  -2   0    0.80   15.70
  11   2   0  -26.90   32.50
  11   2   0  -32.90   27.30
 -12  -2   0   26.80   37.50
  12   2   0  -15.70   29.10
  12   2   0  -12.10   40.90
 -13  -2   0   -4.50   37.90
  13   2   0   23.10   43.20
  13   2   0   23.10   38.90
 -14  -2   0  424.36   71.39
 -14  -2   0  257.87   63.49
  14   2   0  203.98   54.19
  14   2   0  199.48   65.49
  14   2   0  262.77   68.09
 -15  -2   0  520.75   82.49
 -15  -2   0  580.04   78.79
  15   2   0  481.85   78.09
  15   2   0  480.35   92.69
  15   2   0  355.06   79.09
  16  -3   0  -28.30   48.50
  16  -3   0   38.60   45.70
 -16   3   0   20.80   45.60
 -16   3   0   21.40   41.70
  15  -3   0  195.48   56.59
  15  -3   0  155.98   57.59
 -15   3   0  161.18   51.89
 -15   3   0  262.87   63.39
  14  -3   0   64.39   35.40
  14  -3   0  -51.49   36.00
 -14   3   0   15.20   33.20
 -14   3   0   51.29   42.80
  13  -3   0  318.17   56.29
  13  -3   0  481.75   66.49
 -13   3   0  377.16   60.09
 -13   3   0  453.25   71.19
  12  -3   0 1089.19   87.59
  12  -3   0 1004.20   67.89
  12  -3   0 1077.69   83.89
 -12   3   0 1099.19   88.39
 -12   3   0 1163.88   90.89
  11  -3   0  186.08   43.80
  11  -3   0  131.19   38.00
  11  -3   0  193.88   29.80
 -11   3   0  164.88   41.40
 -11   3   0  100.99   35.90
  10  -3   0  131.59   25.80
  10  -3   0  125.49   33.40
  10  -3   0  142.99   34.40
 -10   3   0  141.39   34.70
 -10   3   0  187.58   43.10
   9  -3   0   37.70   22.30
   9  -3   0   22.10   21.30
   9  -3   0   15.10   16.80
  -9   3   0   35.40   15.30
  -9   3   0   -0.80   21.20
  -9   3   0   20.20   22.70
   8  -3   0   98.09   26.80
   8  -3   0  101.59   24.60
   8  -3   0   27.70   16.50
  -8   3   0   81.79   27.90
  -8   3   0  103.79   19.30
  -8   3   0  104.09   27.90
   7  -3   0  538.65   46.90
   7  -3   0  626.44   41.50
   7  -3   0  562.94   43.50
  -7   3   0  562.34   49.90
  -7   3   0  575.74   37.30
  -7   3   0  556.54   47.40
   6  -3   0  935.31   58.59
   6  -3   0  988.40   53.69
   6  -3   0  918.41   53.09
  -6   3   0  835.22   48.70
  -6   3   0 1003.80   58.99
  -6   3   0 1006.90   61.49
  -6   3   0  856.51   50.19
   5  -3   0 7939.41  287.47
   5  -3   0 7143.59  289.07
   5  -3   0 7213.88  290.77
   5  -3   0 7089.99  284.07
   5  -3   0 7338.87  290.77
  -5   3   0 7156.98  288.87
  -5   3   0 7211.78  285.57
  -5   3   0 7264.87  283.27
  -5   3   0 7558.74  293.67
  -5   3   0 7383.26  283.37
  -5   3   0 7449.75  291.07
   4  -3   0  121.69   19.00
   4  -3   0  142.09   22.70
   4  -3   0  166.18   23.10
   4  -3   0  172.98   22.90
   4  -3   0  176.58   19.70
  -4   3   0  148.09   18.90
  -4   3   0   96.69   18.70
  -4   3   0  134.29   20.20
  -4   3   0  168.18   18.70
  -4   3   0  126.09   21.70
   3  -3   0 4537.85  178.88
   3  -3   0 4370.56  177.08
   3  -3   0 4406.76  172.58
   3  -3   0 4439.26  178.08
  -3   3   0 4436.06  178.18
  -3   3   0 4501.45  176.68
  -3   3   0 4418.06  179.28
  -3   3   0 4645.84  177.68
  -3   3   0 4705.43  173.98
   2  -3   0 2595.54  101.39
   2  -3   0 2609.74  100.19
  -2   3   0 2083.19   99.49
  -2   3   0 2657.93  100.29
   1  -3   0   -3.10    3.30
   1  -3   0    2.10    4.30
   1  -3   0    1.00    3.40
  -1   3   0   -3.30    2.90
  -1   3   0   -1.00    3.40
  -1   3   0    2.70    5.00
  -1   3   0   -0.10    3.70
   0  -3   0   -1.60    4.40
   0  -3   0    2.40    5.70
   0  -3   0   -8.70    3.50
   0  -3   0    0.00    4.10
   0  -3   0   -2.50    3.00
   0   3   0  -11.00    5.10
   0   3   0   -8.20    2.60
   0   3   0   -2.90    4.20
   0   3   0   -8.60    4.80
   0   3   0    3.90    5.40
  -1  -3   0  485.55   24.30
  -1  -3   0  397.96   19.90
  -1  -3   0  429.16   28.40
   1   3   0  399.36   23.40
   1   3   0  421.16   22.20
   1   3   0  322.47   19.50
   1   3   0  409.66   21.70
  -2  -3   0   65.79   10.40
  -2  -3   0   61.49   15.50
  -2  -3   0   57.99   11.60
  -2  -3   0   47.30   10.80
  -2  -3   0   59.99   10.30
   2   3   0   86.69   10.90
   2   3   0   61.99   11.70
   2   3   0   40.30   14.90
   2   3   0   76.89   12.50
  -3  -3   0 3053.69  123.29
  -3  -3   0 2927.51  123.59
  -3  -3   0 3024.50  128.29
  -3  -3   0 2926.21  117.69
   3   3   0 2866.21  123.19
   3   3   0 2951.10  123.39
   3   3   0 3097.79  118.19
   3   3   0 3017.60  129.09
   3   3   0 2984.30  122.89
  -4  -3   0 1871.21   89.69
  -4  -3   0 1980.00   81.59
  -4  -3   0 1915.61   81.49
  -4  -3   0 1971.20   89.09
   4   3   0 1945.91   90.39
   4   3   0 1939.61   81.29
   4   3   0 1967.00   88.79
   4   3   0 2067.69   96.39
   4   3   0 1935.51   89.79
  -5  -3   0 2620.34  120.59
  -5  -3   0 2695.93  111.89
  -5  -3   0 2732.93  111.89
   5   3   0 2752.42  111.29
   5   3   0 2835.12  128.99
   5   3   0 2778.12  121.29
  -6  -3   0   25.70   11.70
  -6  -3   0   58.79   21.40
  -6  -3   0   31.90   12.70
   6   3   0   24.90   18.30
   6   3   0   61.19   27.50
  -7  -3   0    3.40   11.60
  -7  -3   0   19.50   19.80
  -7  -3   0   13.40   11.70
   7   3   0   38.40   26.80
   7   3   0    7.50   19.80
  -8  -3   0   41.20   23.90
  -8  -3   0   15.10   13.10
  -8  -3   0   30.50   13.50
   8   3   0   -0.50   27.00
   8   3   0   21.00   24.80
  -9  -3   0  208.48   34.30
  -9  -3   0  254.57   28.60
  -9  -3   0  308.17   47.20
   9   3   0  167.28   44.10
   9   3   0  282.37   45.40
 -10  -3   0 1100.59   81.19
 -10  -3   0  943.81   56.29
  10   3   0  932.01   76.19
  10   3   0  982.70   89.19
 -11  -3   0   21.50   17.40
 -11  -3   0   -2.70   30.80
  11   3   0  -15.20   36.80
  11   3   0   32.90   31.30
 -12  -3   0  498.85   65.39
 -12  -3   0  580.44   70.59
  12   3   0  458.65   78.49
  12   3   0  474.85   64.89
  12   3   0  330.77   65.39
 -13  -3   0  169.78   48.60
 -13  -3   0  180.28   55.59
  13   3   0  197.88   52.69
  13   3   0   39.00   47.50
  13   3   0  121.49   57.09
 -14  -3   0   94.09   51.09
 -14  -3   0  -32.80   34.10
  14   3   0   42.10   56.39
  14   3   0  144.49   51.49
  14   3   0   20.50   49.60
  16  -4   0  186.28   63.59
 -16   4   0  123.19   51.89
 -16   4   0  157.78   52.49
  15  -4   0  136.19   52.29
  15  -4   0  498.55   77.89
 -15   4   0  285.57   63.39
 -15   4   0  139.89   50.39
  14  -4   0  -22.10   34.00
  14  -4   0  -10.00   31.30
 -14   4   0   20.60   37.40
 -14   4   0   16.70   31.30
  13  -4   0  -29.80   30.20
  13  -4   0  -14.00   27.70
 -13   4   0   22.10   35.00
 -13   4   0   31.90   33.00
  12  -4   0   13.80   29.50
  12  -4   0   21.70   22.90
  12  -4   0   56.69   33.80
 -12   4   0   27.10   31.00
 -12   4   0   40.40   33.30
  11  -4   0   46.00   32.40
  11  -4   0   29.90   27.80
  11  -4   0   94.69   24.90
 -11   4   0   72.79   34.00
 -11   4   0   56.89   34.60
  10  -4   0  779.02   61.39
  10  -4   0  798.92   55.29
  10  -4   0  851.91   69.69
 -10   4   0  771.12   68.89
 -10   4   0  755.92   49.20
 -10   4   0  841.92   70.19
   9  -4   0   -0.50   16.80
   9  -4   0   22.80   21.20
   9  -4   0    4.20   18.80
  -9   4   0    3.40   14.80
  -9   4   0    3.40   20.50
  -9   4   0   22.60   21.90
   8  -4   0 1598.04   92.69
   8  -4   0 1649.04   86.79
   8  -4   0 1717.43   86.29
  -8   4   0 1673.13   81.39
  -8   4   0 1805.22   96.39
  -8   4   0 1775.92   98.19
   7  -4   0  734.33   48.50
   7  -4   0  742.33   55.39
   7  -4   0  850.01   51.29
  -7   4   0  793.02   46.60
  -7   4   0  777.52   46.60
  -7   4   0  704.83   52.39
  -7   4   0  768.72   55.29
  -7   4   0  730.03   56.49
   6  -4   0  534.85   36.20
   6  -4   0  481.65   37.80
   6  -4   0  526.05   50.09
  -6   4   0  471.45   36.10
  -6   4   0  455.45   35.10
  -6   4   0  409.46   32.00
  -6   4   0  478.65   47.10
  -6   4   0  466.65   40.90
   5  -4   0   89.59   19.10
   5  -4   0   56.99   18.00
   5  -4   0   86.39   21.00
   5  -4   0  111.09   19.40
   5  -4   0   77.89   18.80
  -5   4   0  100.49   18.10
  -5   4   0   76.99   15.10
  -5   4   0   60.49   19.40
  -5   4   0   79.19   18.90
  -5   4   0   85.89   20.60
   4  -4   0   15.20   11.90
   4  -4   0   21.10   11.70
   4  -4   0   19.80   13.80
   4  -4   0   38.00   11.90
  -4   4   0   34.70   15.10
  -4   4   0   24.80   10.60
  -4   4   0   35.70   15.50
  -4   4   0   46.30   13.40
  -4   4   0   34.00   13.50
   3  -4   0  100.89   12.50
   3  -4   0  105.99   15.70
   3  -4   0   77.29   15.10
   3  -4   0   76.69   15.70
   3  -4   0   83.19   12.50
   3  -4   0   77.39   15.90
  -3   4   0  106.89   15.50
  -3   4   0  101.99   12.40
  -3   4   0  111.69   18.10
  -3   4   0   95.79   16.50
  -3   4   0   64.09   13.70
   2  -4   0  353.06   22.50
   2  -4   0  283.57   23.40
   2  -4   0  219.38   20.10
   2  -4   0  345.37   21.90
   2  -4   0  358.26   19.40
  -2   4   0  241.28   21.10
  -2   4   0  341.07   21.40
  -2   4   0  358.86   18.90
  -2   4   0  230.28   20.20
  -2   4   0  325.17   24.30
   0  -4   0 9297.67  349.57
   0  -4   0 8717.53  342.17
   0  -4   0 9189.88  346.17
   0   4   0 9540.55  346.47
   0   4   0 8802.72  342.17
   0   4   0 9151.48  349.77
   0   4   0 9648.73  347.37
  -1  -4   0  113.59   14.10
  -1  -4   0   99.49   12.20
  -1  -4   0   93.19   17.00
  -1  -4   0  109.19   10.30
  -1  -4   0   91.39   13.10
   1   4   0  125.59   15.30
   1   4   0  137.09   15.90
   1   4   0   88.09   12.70
   1   4   0   82.49   18.90
   1   4   0  118.59   11.70
  -2  -4   0  541.75   30.90
  -2  -4   0  516.55   29.10
  -2  -4   0  528.35   27.60
  -2  -4   0  519.15   31.30
  -2  -4   0  568.74   37.80
   2   4   0  534.65   31.00
   2   4   0  516.45   28.60
   2   4   0  502.55   31.60
   2   4   0  509.05   31.30
   2   4   0  529.15   39.70
  -3  -4   0  166.18   25.60
  -3  -4   0  190.98   19.10
  -3  -4   0  184.38   20.20
  -3  -4   0  193.18   18.80
  -3  -4   0  165.98   21.20
   3   4   0  133.19   24.90
   3   4   0  137.99   19.20
   3   4   0  136.89   20.50
   3   4   0  165.18   17.00
   3   4   0  190.78   21.90
   3   4   0  133.59   20.10
  -4  -4   0  383.66   29.70
  -4  -4   0  376.46   26.50
  -4  -4   0  400.56   33.10
   4   4   0  373.56   34.50
   4   4   0  385.96   44.90
   4   4   0  383.16   25.80
   4   4   0  389.26   36.00
  -5  -4   0   60.59   13.60
  -5  -4   0   80.59   21.60
  -5  -4   0   68.69   17.80
  -5  -4   0   66.19   14.20
   5   4   0   11.00   22.90
   5   4   0   57.19   13.90
   5   4   0   60.19   20.70
  -6  -4   0   22.40   12.40
  -6  -4   0   51.79   22.00
  -6  -4   0   37.70   13.30
   6   4   0   29.60   12.40
   6   4   0    3.80   22.20
   6   4   0   47.40   20.10
  -7  -4   0 1744.13   92.59
  -7  -4   0 1743.43   78.89
  -7  -4   0 1672.93   79.09
   7   4   0 1772.52  103.39
   7   4   0 1627.44   90.89
  -8  -4   0  518.15   37.20
  -8  -4   0  499.95   37.20
  -8  -4   0  628.14   61.19
   8   4   0  479.55   60.99
   8   4   0  581.34   56.09
  -9  -4   0  400.06   36.20
  -9  -4   0  405.26   52.09
  -9  -4   0  337.87   46.90
   9   4   0  320.87   57.69
   9   4   0  311.57   47.20
 -10  -4   0  326.17   49.99
 -10  -4   0  389.26   55.39
 -10  -4   0  409.76   38.60
  10   4   0  289.17   58.89
  10   4   0  443.96   56.39
 -11  -4   0   40.30   32.30
 -11  -4   0   20.60   18.70
 -11  -4   0   -3.20   32.50
  11   4   0  -37.80   26.20
  11   4   0   35.90   42.50
  11   4   0    8.10   39.40
 -12  -4   0  -10.70   35.30
 -12  -4   0   47.30   36.10
  12   4   0   33.90   47.20
  12   4   0   -8.80   42.20
  12   4   0   49.80   39.30
 -13  -4   0   24.10   39.30
 -13  -4   0   77.89   44.00
  13   4   0   93.09   45.20
  13   4   0   62.39   49.00
  13   4   0   42.90   48.30
 -14  -4   0  293.37   58.09
 -14  -4   0  379.26   71.99
  14   4   0  215.98   65.69
  14   4   0  180.28   57.79
  14   4   0  183.38   70.19
  16  -5   0   37.90   47.30
 -16   5   0   56.79   46.10
 -16   5   0  108.69   54.99
  15  -5   0  391.66   67.49
  15  -5   0  226.78   59.29
 -15   5   0  194.18   53.09
 -15   5   0  289.67   64.29
  14  -5   0  -34.80   30.80
  14  -5   0   17.40   34.50
 -14   5   0   67.59   39.10
 -14   5   0    6.80   35.80
  13  -5   0  785.22   79.09
  13  -5   0 1022.00   98.79
 -13   5   0  657.63   81.59
 -13   5   0  767.32   84.39
  12  -5   0  614.94   66.09
  12  -5   0  695.83   81.49
  12  -5   0  637.64   53.19
 -12   5   0  612.74   73.99
 -12   5   0  444.56   66.29
  11  -5   0  399.86   44.60
  11  -5   0  294.97   45.70
  11  -5   0  237.08   45.90
 -11   5   0  319.47   37.40
 -11   5   0  339.77   56.29
 -11   5   0  291.67   52.39
  10  -5   0   49.50   24.00
  10  -5   0   78.69   29.90
  10  -5   0   66.29   26.20
 -10   5   0   59.99   20.40
 -10   5   0  -11.80   24.40
 -10   5   0   32.90   27.00
   9  -5   0  -14.40   19.60
   9  -5   0   32.90   21.70
   9  -5   0  -11.50   14.90
  -9   5   0    9.10   21.10
  -9   5   0  -19.50   15.00
  -9   5   0   -1.10   21.10
   8  -5   0  511.15   56.99
   8  -5   0  477.75   46.30
   8  -5   0  514.65   48.80
  -8   5   0  581.24   61.49
  -8   5   0  475.35   39.90
  -8   5   0  603.84   61.49
   7  -5   0   26.10   18.00
   7  -5   0   32.30   19.10
   7  -5   0   35.00   16.30
  -7   5   0   10.10   12.20
  -7   5   0   32.70   19.70
  -7   5   0   16.70   15.40
  -7   5   0   15.30   17.70
   6  -5   0  786.32   46.20
   6  -5   0  844.22   55.49
   6  -5   0  876.11   53.09
  -6   5   0  779.52   43.20
  -6   5   0  848.12   46.10
  -6   5   0  765.92   49.20
  -6   5   0  728.03   54.09
  -6   5   0  863.81   55.89
   5  -5   0 2807.82  117.59
   5  -5   0 2921.81  127.59
   5  -5   0 2753.02  124.79
  -5   5   0 2838.22  118.39
  -5   5   0 2923.41  123.99
  -5   5   0 2865.91  127.19
  -5   5   0 2773.42  124.29
  -5   5   0 3100.09  130.49
   4  -5   0   16.20   12.30
   4  -5   0   38.20   14.70
   4  -5   0    7.30   13.10
   4  -5   0   12.50    9.80
   4  -5   0   12.30   12.40
  -4   5   0   22.90   11.30
  -4   5   0   18.70   13.00
  -4   5   0   20.30   13.80
  -4   5   0   14.30    9.10
  -4   5   0    9.40   11.20
   3  -5   0 1921.51   83.89
   3  -5   0 1952.90   85.69
   3  -5   0 1914.91   85.09
   3  -5   0 1912.31   86.69
   3  -5   0 2014.30   80.79
  -3   5   0 1885.01   86.69
  -3   5   0 1872.91   85.79
  -3   5   0 2043.20   79.79
  -3   5   0 1916.91   85.19
  -3   5   0 1943.01   83.59
   2  -5   0   20.70    8.80
   2  -5   0    9.10   11.00
   2  -5   0   25.30    9.00
   2  -5   0   16.40    9.50
   2  -5   0    0.50    7.80
  -2   5   0   19.90   10.80
  -2   5   0   22.90   10.00
  -2   5   0   -4.40    6.50
  -2   5   0   13.40   11.60
  -2   5   0    9.10    8.30
   1  -5   0   47.60    9.50
   1  -5   0   57.49   11.90
   1  -5   0   51.19   11.80
   1  -5   0   39.50   13.30
   1  -5   0   32.00    8.50
   1  -5   0   34.70   13.60
  -1   5   0   47.30   10.70
  -1   5   0   40.50    9.60
  -1   5   0   53.59   11.60
  -1   5   0   58.09   13.20
   0  -5   0  818.42   45.30
   0  -5   0  682.13   35.30
   0  -5   0  834.52   40.80
   0  -5   0  849.22   40.70
   0  -5   0  835.22   42.80
   0   5   0  830.22   35.60
   0   5   0  835.52   40.50
   0   5   0  796.72   41.30
   0   5   0  862.91   46.40
   0   5   0  833.42   41.10
  -1  -5   0   56.79    8.70
  -1  -5   0   21.10   14.70
  -1  -5   0   62.49   12.90
  -1  -5   0   67.69   13.80
  -1  -5   0   42.70   12.60
   1   5   0   51.49   12.10
   1   5   0   57.39   12.10
   1   5   0   57.59   12.50
   1   5   0   32.20   16.10
   1   5   0   69.49    9.80
  -2  -5   0 2683.93  110.39
  -2  -5   0 2645.34  117.89
  -2  -5   0 2587.94  111.29
  -2  -5   0 2733.33  105.99
  -2  -5   0 2569.34  109.49
   2   5   0 2747.23  108.49
   2   5   0 2676.53  110.89
   2   5   0 2714.43  120.29
   2   5   0 2694.73  108.79
   2   5   0 2582.14  111.19
  -3  -5   0 1925.81   85.59
  -3  -5   0 1932.51   81.59
  -3  -5   0 1910.51   82.79
  -3  -5   0 2060.99   94.09
   3   5   0 1796.92   85.39
   3   5   0 1889.71   85.69
   3   5   0 1945.41   81.79
   3   5   0 1832.02   86.69
   3   5   0 2052.59   98.09
   3   5   0 1861.11   85.79
  -4  -5   0 1365.76   67.59
  -4  -5   0 1289.07   61.79
  -4  -5   0 1284.17   63.19
   4   5   0 1362.56   70.09
   4   5   0 1294.77   67.59
   4   5   0 1390.16   79.99
   4   5   0 1331.37   67.79
   4   5   0 1349.56   61.29
  -5  -5   0  756.72   41.10
  -5  -5   0  713.63   41.30
  -5  -5   0  743.63   45.50
  -5  -5   0  768.22   49.40
   5   5   0  717.23   49.20
   5   5   0  749.82   41.30
   5   5   0  754.62   52.89
   5   5   0  654.13   58.59
  -6  -5   0  325.47   27.70
  -6  -5   0  355.36   29.00
  -6  -5   0  391.06   41.20
  -6  -5   0  353.96   37.00
   6   5   0  395.06   42.60
   6   5   0  336.67   28.50
   6   5   0  357.16   45.40
   6   5   0  292.37   45.90
  -7  -5   0   14.30   14.00
  -7  -5   0   12.40   18.40
  -7  -5   0   -9.60   21.00
  -7  -5   0    3.00   12.20
   7   5   0   34.20   29.60
   7   5   0   -5.30   11.40
   7   5   0   28.80   22.10
   7   5   0  -18.40   22.20
  -8  -5   0   18.00   15.30
  -8  -5   0   18.30   22.40
  -8  -5   0   14.20   24.00
  -8  -5   0  -11.90   14.20
   8   5   0   34.20   34.60
   8   5   0   -9.00   28.70
   8   5   0    3.00   24.90
  -9  -5   0  485.35   58.59
  -9  -5   0  522.65   56.39
  -9  -5   0  459.45   39.60
   9   5   0  498.05   64.99
   9   5   0  643.54   66.19
   9   5   0  493.65   71.29
 -10  -5   0  864.51   69.09
 -10  -5   0  821.42   52.99
 -10  -5   0  998.00   79.69
  10   5   0  794.32   75.49
  10   5   0  782.62   87.19
  10   5   0  666.13   90.29
 -11  -5   0   10.70   37.20
 -11  -5   0   55.19   33.50
  11   5   0   92.09   45.10
  11   5   0   52.69   45.40
  11   5   0  109.69   41.90
 -12  -5   0  605.14   71.39
 -12  -5   0  573.24   74.19
  12   5   0  722.43   81.09
  12   5   0  428.06   80.99
  12   5   0  596.04   84.49
 -13  -5   0   38.60   46.40
 -13  -5   0   90.99   42.50
  13   5   0   87.99   52.19
  13   5   0  114.49   59.19
  13   5   0   63.89   50.29
 -14  -5   0   29.80   48.00
 -14  -5   0   50.39   43.90
  14   5   0   14.00   51.09
  14   5   0   31.00   45.80
  14   5   0   33.00   52.09
  16  -6   0  139.69   57.79
 -16   6   0  102.39   57.49
 -16   6   0  161.78   53.79
  15  -6   0  149.19   49.30
  15  -6   0  168.18   56.49
 -15   6   0  167.18   49.70
 -15   6   0  194.98   56.69
  14  -6   0  -20.00   31.60
  14  -6   0   41.90   39.90
 -14   6   0  -23.10   28.80
 -14   6   0   26.00   37.90
  13  -6   0   15.20   28.80
  13  -6   0    5.40   32.30
 -13   6   0   22.70   37.30
 -13   6   0   23.90   33.90
  12  -6   0   36.50   30.30
  12  -6   0   -3.80   22.60
  12  -6   0  -23.90   23.10
 -12   6   0   -4.70   31.20
 -12   6   0   -2.10   28.40
 -12   6   0   10.60   19.80
  11  -6   0  108.89   31.10
  11  -6   0  134.99   38.60
  11  -6   0  104.69   29.70
 -11   6   0  194.18   43.60
 -11   6   0  142.19   29.00
 -11   6   0   85.49   34.20
  10  -6   0 1031.30   67.89
  10  -6   0 1179.08   81.19
  10  -6   0  887.31   64.69
 -10   6   0  961.60   78.69
 -10   6   0  998.50   77.99
 -10   6   0 1015.80   62.29
   9  -6   0   55.29   20.40
   9  -6   0   28.70   26.30
   9  -6   0   25.00   20.10
  -9   6   0   27.50   18.40
  -9   6   0   33.30   23.20
  -9   6   0   44.30   24.50
   8  -6   0 1873.41   98.09
   8  -6   0 2024.10  104.59
   8  -6   0 1980.20   92.19
  -8   6   0 1765.52   92.99
  -8   6   0 1782.92  104.39
  -8   6   0 2000.40  104.39
  -8   6   0 1776.92   90.39
  -8   6   0 2021.40   94.79
   7  -6   0  993.60   62.09
   7  -6   0 1055.69   65.19
   7  -6   0  936.31   53.89
  -7   6   0  918.61   53.09
  -7   6   0  972.90   66.59
  -7   6   0  947.41   63.89
   6  -6   0 1169.58   65.99
   6  -6   0 1026.80   53.69
   6  -6   0 1081.59   63.79
  -6   6   0 1030.10   63.99
  -6   6   0 1066.59   54.29
  -6   6   0  986.40   64.69
   5  -6   0  477.95   31.80
   5  -6   0  596.94   42.20
  -5   6   0  551.84   41.20
  -5   6   0  479.25   37.80
  -5   6   0  493.45   37.00
  -5   6   0  487.15   41.90
  -5   6   0  537.25   31.90
   4  -6   0  882.11   43.00
   4  -6   0  796.82   49.60
   4  -6   0  850.21   48.70
   4  -6   0  833.12   46.80
   4  -6   0  792.42   48.00
  -4   6   0  839.92   48.10
  -4   6   0  740.03   49.30
  -4   6   0  799.42   45.90
  -4   6   0  857.61   40.90
  -4   6   0  763.82   47.90
   3  -6   0  941.41   44.70
   3  -6   0  959.00   47.80
   3  -6   0  936.01   48.90
   3  -6   0  955.30   49.99
   3  -6   0  948.71   52.79
  -3   6   0  977.90   43.80
  -3   6   0  918.91   47.20
  -3   6   0  926.71   49.50
  -3   6   0  928.51   50.69
  -3   6   0  895.51   50.69
   2  -6   0  104.19   14.80
   2  -6   0   79.09   15.80
   2  -6   0  121.59   15.60
   2  -6   0   84.49   14.00
   2  -6   0   93.89   16.90
   2  -6   0  101.29   18.20
  -2   6   0   61.79   11.80
  -2   6   0   80.59   15.80
  -2   6   0  102.19   14.60
  -2   6   0  130.59   18.00
  -2   6   0   84.59   17.10
   1  -6   0  616.34   37.60
   1  -6   0  627.74   34.90
   1  -6   0  580.94   33.80
   1  -6   0  646.84   31.60
   1  -6   0  569.34   32.30
   1  -6   0  587.64   37.60
  -1   6   0  622.54   33.00
  -1   6   0  516.85   31.80
  -1   6   0  615.34   36.90
  -1   6   0  571.74   34.10
   0  -6   0 2791.22  113.69
   0  -6   0 2671.63  118.19
   0  -6   0 2787.02  116.39
   0  -6   0 2782.42  113.89
   0   6   0 2813.62  120.29
   0   6   0 2729.83  114.89
   0   6   0 2771.52  107.89
   0   6   0 2649.43  113.09
   0   6   0 2832.82  114.29
   0   6   0 2804.52  110.79
  -1  -6   0 1834.22   80.59
  -1  -6   0 1814.12   86.69
  -1  -6   0 1850.61   80.59
  -1  -6   0 1857.91   74.19
  -1  -6   0 1828.02   81.89
   1   6   0 1825.72   80.59
   1   6   0 1823.62   74.89
   1   6   0 1816.92   79.99
   1   6   0 1892.91   81.29
   1   6   0 1719.43   88.09
  -2  -6   0   52.09   22.80
  -2  -6   0   91.29   12.50
  -2  -6   0   64.29   15.30
  -2  -6   0  104.19   17.40
  -2  -6   0   92.09   16.90
   2   6   0   78.69   16.20
   2   6   0  101.09   16.30
   2   6   0  100.29   14.70
   2   6   0  105.09   19.10
   2   6   0   89.29   14.40
   2   6   0   61.89   21.60
  -3  -6   0   81.59   16.90
  -3  -6   0   77.19   18.60
  -3  -6   0   89.09   14.20
   3   6   0   59.79   16.40
   3   6   0   51.29   26.20
   3   6   0   95.19   16.40
   3   6   0   73.49   17.80
  -4  -6   0  358.26   28.10
  -4  -6   0  343.07   28.60
  -4  -6   0  383.56   33.20
   4   6   0  361.06   34.40
   4   6   0  295.27   33.70
   4   6   0  270.07   41.20
   4   6   0  320.77   31.80
   4   6   0  332.97   26.50
  -5  -6   0  462.45   39.80
  -5  -6   0  413.06   33.40
  -5  -6   0  429.16   33.00
   5   6   0  407.56   54.69
   5   6   0  414.66   43.60
   5   6   0  418.96   40.60
   5   6   0  428.16   31.30
  -6  -6   0  189.08   27.00
  -6  -6   0  179.18   24.20
  -6  -6   0  170.58   22.70
  -6  -6   0  164.88   28.60
   6   6   0  132.99   31.10
   6   6   0  116.69   20.60
   6   6   0   91.29   25.00
   6   6   0  152.18   38.10
  -7  -6   0 1310.37   72.99
  -7  -6   0 1305.47   78.29
  -7  -6   0 1408.96   67.79
  -7  -6   0 1211.88   64.69
   7   6   0 1320.17   94.39
   7   6   0 1119.49   63.39
   7   6   0 1374.66   83.69
   7   6   0 1391.36   79.19
  -8  -6   0  331.17   33.80
  -8  -6   0  315.77   44.70
  -8  -6   0  356.56   43.00
   8   6   0  310.47   57.49
   8   6   0  340.17   52.69
   8   6   0  315.67   45.60
  -9  -6   0  540.35   59.79
  -9  -6   0  458.05   42.40
  -9  -6   0  546.75   56.59
   9   6   0  539.55   59.49
   9   6   0  452.25   76.39
   9   6   0  416.86   61.29
 -10  -6   0  157.08   43.40
 -10  -6   0  178.78   40.10
 -10  -6   0  160.38   28.50
  10   6   0   74.59   51.79
  10   6   0  168.48   44.60
  10   6   0  189.38   50.49
 -11  -6   0  136.79   39.10
 -11  -6   0   71.19   42.20
  11   6   0  115.79   45.80
  11   6   0  101.69   52.79
  11   6   0  125.39   44.10
 -12  -6   0   19.90   33.10
 -12  -6   0  -48.10   38.20
  12   6   0   32.50   35.40
  12   6   0   48.40   45.00
  12   6   0   76.39   53.19
 -13  -6   0  -41.00   33.70
 -13  -6   0   33.90   48.70
  13   6   0  -26.60   44.00
  13   6   0    2.90   39.90
  13   6   0   44.80   52.69
  16  -7   0  -39.70   38.80
 -16   7   0  -39.10   40.80
 -16   7   0   18.80   39.30
  15  -7   0  398.16   68.49
 -15   7   0  290.87   66.59
 -15   7   0  305.47   63.59
  14  -7   0  -33.70   28.70
  14  -7   0    8.10   34.10
 -14   7   0   33.60   35.40
 -14   7   0   35.70   37.20
  13  -7   0 1058.99   76.99
  13  -7   0 1084.79   92.29
  13  -7   0  909.21   76.69
 -13   7   0 1251.07  119.69
 -13   7   0 1105.69   95.69
  12  -7   0  637.34   62.89
  12  -7   0  529.65   59.59
  12  -7   0  578.14   72.59
 -12   7   0  550.14   53.09
 -12   7   0  502.65   70.09
 -12   7   0  669.83   83.89
  11  -7   0  561.54   57.39
  11  -7   0  514.25   56.39
  11  -7   0  557.74   68.89
 -11   7   0  548.75   53.89
 -11   7   0  579.94   70.09
 -11   7   0  403.56   59.19
  10  -7   0   86.69   25.10
  10  -7   0   60.49   27.60
  10  -7   0   83.79   32.40
 -10   7   0   88.09   35.30
 -10   7   0   84.09   32.70
 -10   7   0  110.29   28.80
   9  -7   0  111.19   26.10
   9  -7   0   80.59   29.40
   9  -7   0  100.79   27.80
  -9   7   0   39.50   26.20
  -9   7   0   55.19   27.50
  -9   7   0   82.59   25.50
   8  -7   0  434.66   40.60
   8  -7   0  398.06   46.40
   8  -7   0  450.75   49.99
  -8   7   0  414.36   43.10
  -8   7   0  407.06   47.00
  -8   7   0  338.17   35.70
  -8   7   0  383.16   48.60
   7  -7   0  414.46   37.30
   7  -7   0  314.47   39.70
   7  -7   0  317.67   40.10
  -7   7   0  260.57   36.70
  -7   7   0  289.47   41.40
  -7   7   0  309.47   31.10
   6  -7   0 1024.20   53.19
   6  -7   0 1051.49   64.79
  -6   7   0 1086.09   67.49
  -6   7   0 1073.99   53.19
  -6   7   0 1015.60   64.09
   5  -7   0 3396.16  142.19
   5  -7   0 3585.44  154.48
   5  -7   0 3574.84  153.78
  -5   7   0 3617.74  142.99
  -5   7   0 3645.64  154.28
  -5   7   0 3589.94  156.38
   4  -7   0  147.19   27.00
   4  -7   0  135.89   23.90
   4  -7   0  139.49   22.70
   4  -7   0  134.39   18.40
   4  -7   0   83.69   18.20
  -4   7   0  163.48   25.00
  -4   7   0  178.38   18.20
  -4   7   0  143.09   26.70
  -4   7   0  132.19   19.90
  -4   7   0  165.08   24.80
   3  -7   0  624.94   40.30
   3  -7   0  647.74   37.80
   3  -7   0  660.33   44.10
   3  -7   0  601.44   37.70
   3  -7   0  655.63   36.10
  -3   7   0  666.73   37.90
  -3   7   0  626.84   41.30
  -3   7   0  664.93   41.00
  -3   7   0  691.03   42.80
  -3   7   0  647.74   34.30
   2  -7   0  139.79   18.50
   2  -7   0   93.79   13.80
   2  -7   0   95.49   15.70
   2  -7   0   98.29   17.50
   2  -7   0  120.39   21.30
   2  -7   0   97.49   14.60
  -2   7   0   87.29   16.40
  -2   7   0   73.09   13.80
  -2   7   0   90.29   13.30
  -2   7   0  109.89   17.50
  -2   7   0   83.59   18.00
   1  -7   0  534.15   37.90
   1  -7   0  583.74   35.10
   1  -7   0  493.05   33.60
   1  -7   0  514.75   37.80
  -1   7   0  455.35   30.90
  -1   7   0  621.84   34.40
  -1   7   0  551.44   36.40
  -1   7   0  539.65   28.50
  -1   7   0  563.44   37.90
  -1   7   0  510.45   34.30
   0  -7   0 1751.72   80.39
   0  -7   0 1891.81   81.59
   0  -7   0 1878.31   84.59
   0  -7   0 1694.73   85.69
   0   7   0 1879.11   77.79
   0   7   0 1674.23   81.29
   0   7   0 1824.92   74.29
   0   7   0 1899.11   82.09
   0   7   0 1896.31   81.29
   0   7   0 1793.82   88.29
  -1  -7   0  190.08   24.40
  -1  -7   0  213.88   26.60
  -1  -7   0  200.98   17.80
  -1  -7   0  184.48   22.60
  -1  -7   0  178.58   28.00
   1   7   0  217.88   32.30
   1   7   0  189.98   24.20
   1   7   0  222.48   23.80
   1   7   0  168.68   21.80
   1   7   0  223.28   17.90
  -2  -7   0  556.74   38.10
  -2  -7   0  549.35   30.00
  -2  -7   0  599.34   37.50
   2   7   0  577.94   38.00
   2   7   0  529.45   48.50
   2   7   0  549.15   31.80
   2   7   0  539.35   35.70
  -3  -7   0 1748.72   77.19
  -3  -7   0 1704.03   82.99
  -3  -7   0 1875.11   84.09
   3   7   0 1806.72   80.79
   3   7   0 1765.32   81.19
   3   7   0 1837.02   84.29
   3   7   0 1888.81  100.09
  -4  -7   0  904.41   48.00
  -4  -7   0  897.11   51.59
  -4  -7   0  957.90   54.99
   4   7   0  888.01   68.99
   4   7   0  880.31   54.19
   4   7   0  943.61   54.39
  -5  -7   0  841.82   50.99
  -5  -7   0  896.71   56.39
  -5  -7   0  943.11   51.49
   5   7   0  973.10   75.49
   5   7   0  865.31   57.39
   5   7   0  897.11   57.89
  -6  -7   0  336.17   33.00
  -6  -7   0  403.96   37.50
  -6  -7   0  347.57   40.60
  -6  -7   0  329.37   34.00
   6   7   0  242.08   48.50
   6   7   0  356.16   44.20
   6   7   0  309.87   38.40
  -7  -7   0    0.00   17.00
  -7  -7   0  -26.60   22.90
  -7  -7   0  -10.60   17.20
  -7  -7   0    4.40   14.60
   7   7   0   80.79   40.60
   7   7   0  -11.50   25.70
   7   7   0   22.30   25.00
  -8  -7   0   58.89   30.50
  -8  -7   0  139.99   30.10
  -8  -7   0   87.99   22.90
   8   7   0   71.99   33.50
   8   7   0   91.19   43.70
   8   7   0  190.98   37.80
  -9  -7   0  574.14   63.49
  -9  -7   0  476.15   53.69
  -9  -7   0  619.14   47.10
   9   7   0  544.55   61.79
   9   7   0  452.45   73.99
   9   7   0  718.43   76.19
 -10  -7   0  481.95   48.40
 -10  -7   0  447.56   61.49
 -10  -7   0  418.06   52.59
  10   7   0  426.46   64.89
  10   7   0  452.65   79.09
  10   7   0  393.86   56.39
 -11  -7   0  184.58   47.30
 -11  -7   0  186.08   40.50
  11   7   0  182.28   47.10
  11   7   0  112.09   57.69
  11   7   0  145.39   49.00
 -12  -7   0  415.46   65.29
 -12  -7   0  384.96   57.29
  12   7   0  425.76   64.79
  12   7   0  340.97   69.19
  12   7   0  353.26   76.39
 -13  -7   0   62.69   40.00
 -13  -7   0    8.50   46.20
  13   7   0   89.39   60.99
  13   7   0   11.80   44.10
  13   7   0  -38.90   42.30
  16  -8   0   73.69   48.50
 -16   8   0  184.48   59.99
 -16   8   0  186.38   59.39
  15  -8   0  167.78   53.59
 -15   8   0  198.38   54.79
 -15   8   0  168.38   53.49
  14  -8   0   19.10   35.40
  14  -8   0  -52.49   23.10
 -14   8   0   31.80   36.20
 -14   8   0   20.40   39.70
  13  -8   0   73.79   38.30
  13  -8   0   98.49   34.00
  13  -8   0   17.70   26.40
 -13   8   0   71.39   38.80
 -13   8   0   27.50   38.80
  12  -8   0   16.40   31.70
  12  -8   0   57.89   28.30
  12  -8   0  126.49   35.20
 -12   8   0   58.59   37.30
 -12   8   0   86.49   28.90
 -12   8   0   61.69   34.20
  11  -8   0  408.66   48.40
  11  -8   0  368.46   56.89
  11  -8   0  437.46   56.29
 -11   8   0  351.86   55.79
 -11   8   0  350.26   56.59
 -11   8   0  395.26   47.50
  10  -8   0 1278.27   90.29
  10  -8   0 1399.96   86.29
  10  -8   0 1302.97   74.99
 -10   8   0 1324.37   79.19
 -10   8   0 1295.97   90.49
 -10   8   0 1319.07   94.29
   9  -8   0  192.58   31.10
   9  -8   0  184.18   36.40
   9  -8   0  149.09   37.10
  -9   8   0  188.78   40.10
  -9   8   0  168.18   32.10
  -9   8   0  210.78   40.30
   8  -8   0 1157.38   63.79
   8  -8   0 1229.58   76.49
   8  -8   0 1261.17   78.69
  -8   8   0 1195.88   62.89
  -8   8   0 1132.09   77.19
  -8   8   0 1211.58   79.69
   7  -8   0  107.79   27.70
   7  -8   0  198.38   25.50
  -7   8   0  216.38   24.30
  -7   8   0  154.08   28.60
  -7   8   0  175.28   32.40
   6  -8   0  582.44   37.30
   6  -8   0  729.83   51.09
  -6   8   0  626.94   36.90
  -6   8   0  539.75   49.10
  -6   8   0  679.73   50.69
   5  -8   0   84.09   17.40
   5  -8   0  104.39   25.10
   5  -8   0   36.50   17.50
  -5   8   0   59.79   14.00
  -5   8   0   85.19   22.10
  -5   8   0   73.59   20.40
   4  -8   0   60.69   18.10
   4  -8   0   37.20   16.60
   4  -8   0   70.99   16.00
   4  -8   0   67.59   22.50
  -4   8   0   55.89   18.80
  -4   8   0   79.89   19.20
  -4   8   0   70.69   14.10
   3  -8   0  844.22   46.50
   3  -8   0  879.21   45.50
   3  -8   0  859.91   49.60
   3  -8   0  875.31   47.60
   3  -8   0  862.01   53.89
  -3   8   0  819.92   46.00
  -3   8   0  902.41   50.39
  -3   8   0  849.61   50.89
   2  -8   0  129.89   21.90
   2  -8   0  111.29   19.50
   2  -8   0  122.69   22.90
   2  -8   0  126.49   21.30
   2  -8   0  110.79   16.60
   2  -8   0   98.49   18.30
  -2   8   0  101.79   19.90
  -2   8   0   93.79   17.70
  -2   8   0   85.49   19.60
   1  -8   0 2347.67  106.49
   1  -8   0 2422.06  102.79
   1  -8   0 2291.47  101.89
   1  -8   0 2438.76  106.49
  -1   8   0 2307.37   95.49
  -1   8   0 2176.88   98.39
  -1   8   0 2513.35  102.89
  -1   8   0 2322.17  103.09
  -1   8   0 2297.37  106.39
   0  -8   0 3853.01  154.78
   0  -8   0 3673.33  160.68
   0  -8   0 3763.72  158.18
   0   8   0 3648.93  161.98
   0   8   0 3820.42  146.79
   0   8   0 3725.23  150.28
   0   8   0 4027.00  164.28
   0   8   0 3606.14  153.78
   0   8   0 3807.32  155.18
  -1  -8   0  860.51   50.79
  -1  -8   0  814.22   49.30
  -1  -8   0  767.92   39.60
   1   8   0  791.42   39.50
   1   8   0  870.21   59.09
  -2  -8   0   55.89   17.00
  -2  -8   0   53.09   19.10
  -2  -8   0   55.59   12.20
   2   8   0   50.29   17.30
   2   8   0   50.19   13.00
   2   8   0    5.30   22.70
  -3  -8   0   26.70   15.70
  -3  -8   0   11.60   10.20
  -3  -8   0   -5.90   12.90
   3   8   0   17.90   14.50
   3   8   0   18.40   25.40
   3   8   0    3.20   14.80
  -4  -8   0  865.71   54.09
  -4  -8   0  881.31   48.40
  -4  -8   0  979.30   56.29
   4   8   0  898.51   56.49
   4   8   0  901.71   71.39
   4   8   0  976.80   54.09
  -5  -8   0 1190.28   69.09
  -5  -8   0 1215.48   64.99
  -5  -8   0 1161.88   60.69
   5   8   0 1201.68   69.59
   5   8   0 1181.28   67.99
   5   8   0 1033.30   83.39
  -6  -8   0  239.58   29.30
  -6  -8   0  219.58   35.20
  -6  -8   0  190.28   29.00
   6   8   0  255.87   49.60
   6   8   0  250.57   38.10
   6   8   0  215.28   34.30
  -7  -8   0 1547.35   92.29
  -7  -8   0 1599.54   84.79
  -7  -8   0 1629.84   83.69
   7   8   0 1617.84  113.29
   7   8   0 1738.63   95.49
   7   8   0 1572.54   93.09
  -8  -8   0  423.76   46.30
  -8  -8   0  460.55   54.59
  -8  -8   0  416.96   42.10
   8   8   0  427.86   70.99
   8   8   0  344.27   50.89
   8   8   0  371.66   50.59
  -9  -8   0  234.58   34.80
  -9  -8   0  240.68   49.40
  -9  -8   0  278.07   40.20
   9   8   0  214.28   44.10
   9   8   0  218.28   47.30
   9   8   0  185.78   59.89
 -10  -8   0  -12.30   25.30
 -10  -8   0   32.50   37.30
  10   8   0    1.70   35.50
  10   8   0   48.50   35.20
  10   8   0   27.40   48.00
 -11  -8   0    9.70   39.00
 -11  -8   0    8.70   30.00
  11   8   0  -23.70   38.20
  11   8   0    0.70   46.30
  11   8   0   60.19   40.90
 -12  -8   0   -8.50   31.30
 -12  -8   0  -35.50   42.50
  12   8   0   13.40   43.30
  12   8   0  102.49   61.99
  12   8   0   50.49   46.40
 -13  -8   0  -57.59   43.30
  13   8   0   24.20   58.19
  13   8   0   21.80   43.90
  16  -9   0  -16.30   44.10
 -16   9   0  -35.60   43.50
 -16   9   0   -6.10   36.40
  15  -9   0  285.87   65.59
 -15   9   0  203.28   56.69
 -15   9   0  167.88   52.59
  14  -9   0   96.39   42.30
 -14   9   0   94.29   45.20
 -14   9   0  182.48   48.70
  13  -9   0  689.73   73.59
  13  -9   0  846.82   94.29
  13  -9   0  658.23   65.69
 -13   9   0  692.83   86.59
 -13   9   0  590.94   60.69
 -13   9   0  671.43   84.89
  12  -9   0  294.97   43.80
  12  -9   0  340.47   58.39
  12  -9   0  306.47   49.10
 -12   9   0  323.27   56.69
 -12   9   0  329.67   45.10
 -12   9   0  299.97   58.09
  11  -9   0  652.43   67.49
  11  -9   0  675.53   78.39
  11  -9   0  565.54   50.29
 -11   9   0  502.35   67.29
 -11   9   0  846.42   87.89
 -11   9   0  745.83   67.09
  10  -9   0  154.88   29.50
  10  -9   0   92.99   31.00
  10  -9   0  132.69   36.10
 -10   9   0  162.98   39.40
 -10   9   0  153.58   39.80
 -10   9   0  136.89   32.40
   9  -9   0  154.18   35.80
   9  -9   0  180.68   35.90
   9  -9   0  161.68   26.90
  -9   9   0  139.19   34.10
  -9   9   0  143.69   25.90
  -9   9   0  172.18   38.20
   8  -9   0  482.15   37.80
   8  -9   0  505.35   56.49
   8  -9   0  558.74   56.39
  -8   9   0  481.25   56.79
  -8   9   0  485.85   36.10
  -8   9   0  459.25   52.09
   7  -9   0  309.57   31.30
   7  -9   0  312.87   39.70
  -7   9   0  286.17   42.00
  -7   9   0  307.87   41.50
  -7   9   0  342.77   27.90
   6  -9   0 1845.12   93.89
   6  -9   0 1625.14   77.19
   6  -9   0 1726.13   91.09
  -6   9   0 1798.82   92.29
  -6   9   0 1665.43   92.99
  -6   9   0 1789.62   77.99
   5  -9   0 3459.65  152.68
   5  -9   0 3357.36  154.68
   5  -9   0 3508.85  144.09
  -5   9   0 3428.46  140.99
  -5   9   0 3539.75  156.08
  -5   9   0 3595.34  153.58
   4  -9   0    2.30   11.90
   4  -9   0   -1.30   13.60
   4  -9   0    4.60   16.20
  -4   9   0   20.20   16.40
  -4   9   0   12.80   11.00
  -4   9   0    0.60   15.60
   3  -9   0  827.62   49.40
   3  -9   0  832.82   48.20
   3  -9   0  961.10   53.39
   3  -9   0  849.12   56.39
   3  -9   0  914.61   48.80
  -3   9   0  894.51   53.59
  -3   9   0  951.30   53.99
  -3   9   0  861.91   44.90
   2  -9   0  496.25   38.40
   2  -9   0  395.96   40.00
   2  -9   0  448.46   33.80
   2  -9   0  450.45   30.00
   2  -9   0  470.75   36.40
  -2   9   0  428.66   35.80
  -2   9   0  365.36   35.50
   1  -9   0  168.18   23.40
   1  -9   0  140.89   25.60
   1  -9   0  100.79   20.60
   1  -9   0  182.48   27.80
  -1   9   0   68.59   20.40
  -1   9   0  112.59   19.10
  -1   9   0  128.29   22.80
  -1   9   0  162.28   17.40
   0  -9   0 1644.14   78.39
   0  -9   0 1625.74   82.49
   0   9   0 1540.85   69.09
   0   9   0 1689.83   79.49
   0   9   0 1759.12   88.39
   0   9   0 1625.44   73.89
  -1  -9   0  746.23   38.20
  -1  -9   0  728.83   49.40
  -1  -9   0  755.22   48.10
   1   9   0  709.03   37.60
   1   9   0  715.53   57.09
  -2  -9   0 1399.56   60.89
  -2  -9   0 1301.57   71.49
  -2  -9   0 1363.66   70.59
   2   9   0 1474.05   72.19
   2   9   0 1370.76   83.79
   2   9   0 1209.58   61.29
  -3  -9   0  304.37   24.80
  -3  -9   0  300.77   31.90
  -3  -9   0  278.27   34.30
   3   9   0  376.36   39.80
   3   9   0  392.56   50.49
  -4  -9   0  746.83   50.39
  -4  -9   0  693.23   41.20
  -4  -9   0  691.93   50.19
   4   9   0  713.43   45.70
   4   9   0  799.42   70.39
   4   9   0  728.23   51.39
  -5  -9   0   15.60   20.00
  -5  -9   0   36.90   19.70
  -5  -9   0  103.39   20.00
   5   9   0    6.40   32.80
   5   9   0   37.00   21.60
   5   9   0   38.80   25.00
  -6  -9   0  100.79   28.60
  -6  -9   0  105.79   22.80
  -6  -9   0  111.79   27.30
   6   9   0  159.08   33.40
   6   9   0  144.89   46.70
   6   9   0  128.09   31.80
  -7  -9   0   17.30   23.30
  -7  -9   0   85.59   32.70
  -7  -9   0   10.70   19.70
   7   9   0   25.90   28.80
   7   9   0   50.39   42.80
   7   9   0   29.00   29.10
  -8  -9   0  151.68   31.10
  -8  -9   0  193.88   43.00
  -8  -9   0   89.09   26.30
   8   9   0  156.88   40.30
   8   9   0  154.28   39.90
   8   9   0   86.79   49.00
  -9  -9   0  170.58   45.00
  -9  -9   0  206.38   36.00
  -9  -9   0  137.49   32.10
   9   9   0  215.58   45.60
   9   9   0  222.38   61.99
   9   9   0  216.38   44.50
 -10  -9   0  446.76   64.19
 -10  -9   0  431.76   53.39
  10   9   0  462.75   63.19
  10   9   0  474.85   64.69
  10   9   0  340.67   75.19
 -11  -9   0   63.09   46.10
 -11  -9   0  152.58   39.60
  11   9   0  172.68   50.09
  11   9   0  128.59   67.99
  11   9   0  162.68   52.59
 -12  -9   0  344.97   66.39
  12   9   0  333.97   63.59
  12   9   0  207.88   79.39
  16 -10   0  176.38   59.69
 -16  10   0   82.39   55.29
 -16  10   0  138.29   55.89
  15 -10   0  193.08   55.99
 -15  10   0  227.68   56.69
 -15  10   0  139.69   50.19
  14 -10   0   37.30   40.50
  14 -10   0  -36.90   30.10
 -14  10   0   23.10   36.30
 -14  10   0   35.70   36.30
  13 -10   0   39.90   39.00
  13 -10   0   29.80   29.40
  13 -10   0   84.19   35.60
 -13  10   0  107.99   43.30
 -13  10   0   21.60   35.10
 -13  10   0   36.80   27.90
  12 -10   0   81.39   27.60
  12 -10   0   40.90   30.50
  12 -10   0  141.29   44.40
 -12  10   0   58.09   37.70
 -12  10   0  100.49   38.90
 -12  10   0   -4.50   23.90
  11 -10   0  556.24   64.09
  11 -10   0  563.74   52.89
  11 -10   0  537.75   69.29
 -11  10   0  501.05   69.19
 -11  10   0  486.45   57.59
 -11  10   0  557.94   71.99
  10 -10   0  909.71   58.19
  10 -10   0  794.62   78.79
  10 -10   0  853.21   72.99
 -10  10   0  991.40   78.89
 -10  10   0  991.50   81.99
 -10  10   0  960.50   70.39
   9 -10   0  124.69   33.70
   9 -10   0  159.48   27.80
   9 -10   0   76.19   31.40
  -9  10   0  118.49   35.00
  -9  10   0  119.19   23.10
  -9  10   0  138.39   38.20
   8 -10   0 1154.48   79.49
   8 -10   0 1138.89   62.89
  -8  10   0 1233.38   81.09
  -8  10   0 1311.77   63.19
  -8  10   0 1218.08   83.39
   7 -10   0   97.59   26.90
  -7  10   0  106.19   30.70
  -7  10   0  100.19   28.90
  -7  10   0   75.59   16.70
   6 -10   0  126.09   30.50
   6 -10   0  154.68   30.80
   6 -10   0  120.89   22.60
  -6  10   0   98.69   28.00
  -6  10   0  154.78   31.40
  -6  10   0  151.08   20.20
   5 -10   0  185.58   30.30
   5 -10   0  206.18   35.30
   5 -10   0  204.68   26.60
  -5  10   0  198.28   22.20
  -5  10   0  227.98   34.00
  -5  10   0  208.68   32.90
   4 -10   0  162.78   29.80
   4 -10   0  126.79   25.50
   4 -10   0  169.88   23.70
   4 -10   0  136.09   23.30
  -4  10   0  168.38   28.30
  -4  10   0  132.19   25.80
   3 -10   0 1616.14   78.79
   3 -10   0 1598.54   85.49
   3 -10   0 1641.44   76.39
   3 -10   0 1500.85   78.99
  -3  10   0 1582.74   80.39
  -3  10   0 1576.94   72.79
  -3  10   0 1553.24   80.49
   2 -10   0  102.29   22.60
   2 -10   0   79.89   20.40
   2 -10   0  151.78   27.20
   2 -10   0  117.69   23.80
  -2  10   0  100.29   16.70
  -2  10   0   94.79   21.70
  -2  10   0   85.69   21.40
   1 -10   0  745.63   49.60
   1 -10   0  830.92   50.79
   1 -10   0  829.82   54.99
  -1  10   0  737.23   46.00
  -1  10   0  856.91   41.30
   0 -10   0  973.90   55.09
   0 -10   0  889.11   58.59
   0  10   0  999.80   65.59
   0  10   0  949.11   55.69
   0  10   0  899.41   44.30
   0  10   0  933.31   50.29
  -1 -10   0   35.90   12.80
  -1 -10   0   18.90   18.60
  -1 -10   0   11.70   17.50
   1  10   0   12.60   10.90
   1  10   0   23.90   17.60
   1  10   0   18.80   23.10
  -2 -10   0   60.59   22.00
  -2 -10   0   31.00   13.70
  -2 -10   0   26.10   20.00
   2  10   0   39.50   26.50
   2  10   0   33.90   12.70
   2  10   0   14.40   17.10
  -3 -10   0  138.09   18.70
  -3 -10   0  154.08   27.90
  -3 -10   0  154.78   26.20
   3  10   0  136.99   38.10
   3  10   0  103.29   25.10
  -4 -10   0   61.09   25.10
  -4 -10   0  111.49   26.60
  -4 -10   0   83.49   17.30
   4  10   0   94.29   38.70
   4  10   0  122.09   28.10
   4  10   0   84.69   22.10
  -5 -10   0  401.36   44.40
  -5 -10   0  367.96   33.30
  -5 -10   0  346.47   41.10
   5  10   0  261.37   53.49
   5  10   0  337.57   38.20
   5  10   0  396.96   46.90
  -6 -10   0   98.59   23.30
  -6 -10   0   96.89   27.80
  -6 -10   0  145.09   34.80
   6  10   0  114.89   29.30
   6  10   0   99.59   42.30
   6  10   0  128.99   31.30
  -7 -10   0  876.41   64.09
  -7 -10   0  957.10   61.19
  -7 -10   0 1049.99   76.99
   7  10   0  935.61  107.29
   7  10   0 1042.00   74.29
   7  10   0  986.20   69.19
  -8 -10   0   24.60   22.60
  -8 -10   0   14.40   22.20
  -8 -10   0    8.60   31.40
   8  10   0   36.40   43.50
   8  10   0   15.80   30.70
   8  10   0   71.69   36.40
  -9 -10   0  232.28   53.09
  -9 -10   0  218.78   38.50
  -9 -10   0  309.07   53.49
   9  10   0  275.57   49.20
   9  10   0  202.98   61.09
   9  10   0  181.48   43.50
 -10 -10   0   14.00   39.50
 -10 -10   0   22.60   30.70
  10  10   0   90.99   57.49
  10  10   0   39.20   38.20
 -11 -10   0    9.10   46.40
  11  10   0    6.50   54.29
  11  10   0  -18.60   37.00
 -12 -10   0    5.70   49.60
  12  10   0   99.29   49.80
  12  10   0   86.99   67.79
  16 -11   0  160.78   55.39
 -16  11   0   78.49   50.69
 -16  11   0  122.29   54.29
  15 -11   0  262.77   58.99
 -15  11   0  223.68   59.39
 -15  11   0  302.57   63.99
  14 -11   0  331.17   56.69
  14 -11   0  169.28   50.89
 -14  11   0  355.56   70.79
 -14  11   0  216.58   55.99
  13 -11   0  862.71   95.09
  13 -11   0  847.02   83.49
 -13  11   0  738.93   73.19
 -13  11   0  681.73   85.19
 -13  11   0  757.32   91.09
  12 -11   0  131.29   39.00
  12 -11   0   62.19   24.10
  12 -11   0   72.99   41.20
 -12  11   0  172.38   47.50
 -12  11   0  141.09   45.70
 -12  11   0   98.29   35.60
  11 -11   0  233.78   34.60
  11 -11   0  259.47   51.59
  11 -11   0  246.58   47.40
 -11  11   0  192.58   48.60
 -11  11   0  225.88   50.59
 -11  11   0  183.28   40.30
  10 -11   0   47.30   32.40
  10 -11   0   25.90   19.00
  10 -11   0  128.69   35.50
 -10  11   0   67.09   32.50
 -10  11   0   41.60   28.90
   9 -11   0  176.08   38.00
   9 -11   0  261.87   32.50
   9 -11   0  228.78   43.30
  -9  11   0  258.57   29.30
  -9  11   0  246.58   46.70
  -9  11   0  134.19   35.90
   8 -11   0  593.14   41.60
   8 -11   0  665.83   67.19
  -8  11   0  617.94   65.59
  -8  11   0  612.84   63.89
  -8  11   0  657.63   40.70
   7 -11   0   31.60   15.10
   7 -11   0   55.79   28.80
   7 -11   0   57.19   25.80
  -7  11   0    5.40   19.60
  -7  11   0   92.09   32.00
  -7  11   0   48.30   14.70
   6 -11   0 1165.68   77.69
   6 -11   0 1232.08   75.79
   6 -11   0 1250.17   65.39
  -6  11   0 1438.86   81.29
  -6  11   0 1189.78   60.29
  -6  11   0 1162.98   74.59
   5 -11   0 1834.82   85.19
   5 -11   0 1868.91   85.89
   5 -11   0 1724.03   96.49
   5 -11   0 1886.31   94.09
  -5  11   0 1642.04   91.99
  -5  11   0 1807.82   96.09
   4 -11   0   76.49   24.40
   4 -11   0   48.50   17.90
   4 -11   0   73.79   19.90
   4 -11   0   55.79   21.10
  -4  11   0   74.29   20.90
  -4  11   0   23.80   19.70
   3 -11   0  975.50   56.59
   3 -11   0  939.71   57.89
   3 -11   0  968.20   60.19
   3 -11   0  991.00   65.09
  -3  11   0 1038.00   54.09
  -3  11   0 1004.30   61.19
  -3  11   0 1010.30   60.39
   2 -11   0   18.20   17.80
   2 -11   0  -32.50   15.30
   2 -11   0    8.60   14.70
  -2  11   0   14.60   16.80
  -2  11   0   11.70   16.00
  -2  11   0   11.60   11.40
   1 -11   0   38.00   17.90
   1 -11   0   37.80   19.40
   1 -11   0   14.90   19.00
  -1  11   0   36.10   11.20
  -1  11   0   29.20   17.20
  -1  11   0   35.60   16.30
   0 -11   0  266.77   35.60
   0 -11   0  278.47   32.60
   0  11   0  288.77   33.60
   0  11   0  221.78   27.40
   0  11   0  277.17   41.60
   0  11   0  280.37   22.10
  -1 -11   0  490.35   49.60
  -1 -11   0  682.93   47.90
   1  11   0  690.73   60.49
   1  11   0  735.13   49.50
   1  11   0  586.34   36.00
  -2 -11   0 1567.44   84.49
  -2 -11   0 1500.15   69.29
  -2 -11   0 1615.54   84.09
   2  11   0 1429.66   69.69
   2  11   0 1521.35   95.99
  -3 -11   0   19.10   14.50
  -3 -11   0   48.40   22.40
  -3 -11   0   13.80   20.70
   3  11   0   39.70   32.50
   3  11   0   -6.80   20.20
  -4 -11   0  949.71   50.49
  -4 -11   0  849.22   62.79
  -4 -11   0  928.81   64.99
   4  11   0  974.90   84.29
   4  11   0  931.51   64.19
  -5 -11   0   16.50   16.90
  -5 -11   0   14.10   23.30
  -5 -11   0   40.10   24.90
   5  11   0   12.10   18.30
   5  11   0  -12.20   24.70
   5  11   0   53.09   40.00
  -6 -11   0   15.80   27.70
  -6 -11   0  -10.50   17.10
  -6 -11   0  -53.89   20.30
   6  11   0   11.50   39.20
   6  11   0   20.90   24.20
   6  11   0    8.60   23.90
  -7 -11   0   47.50   34.10
  -7 -11   0   63.59   29.70
  -7 -11   0  112.09   26.80
   7  11   0   53.99   34.40
   7  11   0   76.99   30.60
   7  11   0   53.49   48.80
  -8 -11   0  211.18   47.10
  -8 -11   0   93.59   28.20
  -8 -11   0   48.10   29.50
   8  11   0   76.69   46.10
   8  11   0   73.29   35.20
   8  11   0   96.89   36.40
  -9 -11   0  157.28   49.10
  -9 -11   0  153.38   37.50
   9  11   0  237.18   50.29
   9  11   0  175.78   65.89
 -10 -11   0  238.88   54.79
  10  11   0  253.97   74.49
  10  11   0  242.48   56.49
 -11 -11   0  224.28   56.49
  11  11   0  125.59   71.59
  11  11   0  256.17   56.29
  16 -12   0  154.58   57.29
 -16  12   0  220.08   65.89
 -16  12   0   65.99   50.19
  15 -12   0  146.49   51.59
 -15  12   0  181.68   57.29
 -15  12   0  124.79   53.09
  14 -12   0   85.79   38.00
  14 -12   0   29.70   38.40
 -14  12   0   49.70   38.90
 -14  12   0   30.90   40.60
  13 -12   0   71.49   34.60
  13 -12   0  -44.40   29.30
 -13  12   0   15.50   29.60
 -13  12   0    6.90   32.10
 -13  12   0    5.70   36.80
  12 -12   0   28.60   32.10
  12 -12   0   23.60   33.00
 -12  12   0   11.90   34.80
 -12  12   0   50.69   33.70
 -12  12   0   45.70   32.50
  11 -12   0  855.71   83.69
  11 -12   0  794.22   55.89
  11 -12   0  904.31   87.19
 -11  12   0  866.31   89.09
 -11  12   0  839.92   81.79
 -11  12   0  816.12   82.89
  10 -12   0  494.25   63.49
  10 -12   0  614.14   70.09
 -10  12   0  437.46   64.09
 -10  12   0  485.85   62.39
   9 -12   0  134.49   39.60
   9 -12   0  147.59   38.20
  -9  12   0   54.69   34.40
  -9  12   0  124.59   31.80
  -9  12   0  102.99   36.40
   8 -12   0 1820.92  108.79
  -8  12   0 2198.88  118.89
  -8  12   0 1938.71  111.59
  -8  12   0 1960.30   89.79
   7 -12   0   62.29   21.10
   7 -12   0   27.30   26.70
   7 -12   0   17.00   14.40
   7 -12   0   23.00   21.10
  -7  12   0   14.60   25.10
  -7  12   0   32.70   14.30
  -7  12   0   44.40   25.80
   6 -12   0   60.99   30.70
   6 -12   0  112.19   27.30
   6 -12   0  128.19   25.00
  -6  12   0   92.69   30.60
  -6  12   0   99.49   28.90
   5 -12   0   16.80   16.90
   5 -12   0   26.40   22.70
   5 -12   0    8.30   15.40
   5 -12   0   27.20   21.60
  -5  12   0   15.90   19.70
  -5  12   0   43.30   23.10
   4 -12   0 1460.25   70.89
   4 -12   0 1320.47   75.79
   4 -12   0 1285.37   70.19
   4 -12   0 1329.67   80.29
  -4  12   0 1205.88   63.09
  -4  12   0 1217.58   74.59
  -4  12   0 1218.88   74.69
   3 -12   0  609.74   58.89
   3 -12   0  641.54   46.40
   3 -12   0  674.63   50.79
  -3  12   0  665.83   49.30
  -3  12   0  621.44   50.19
  -3  12   0  632.64   43.30
   2 -12   0    9.20   20.50
   2 -12   0   12.70   18.00
   2 -12   0    8.80   17.20
  -2  12   0   24.50   12.60
  -2  12   0   11.00   16.30
  -2  12   0   -1.80   15.90
   1 -12   0 1128.29   65.69
   1 -12   0 1111.79   71.09
   1 -12   0 1091.59   64.69
  -1  12   0 1041.10   64.79
  -1  12   0 1151.68   61.39
  -1  12   0  966.70   50.59
   0 -12   0  384.06   42.20
   0 -12   0  422.36   45.70
   0  12   0  411.36   36.20
   0  12   0  368.46   43.30
   0  12   0  403.46   28.10
   0  12   0  479.45   56.49
  -1 -12   0   79.49   23.40
  -1 -12   0   86.09   27.60
   1  12   0   55.49   14.20
   1  12   0   77.69   33.80
   1  12   0  126.29   23.20
   1  12   0   87.99   24.60
  -2 -12   0   80.59   17.30
  -2 -12   0   98.09   29.30
  -2 -12   0   79.89   27.00
   2  12   0   71.49   17.10
   2  12   0   91.19   36.60
  -3 -12   0  103.69   29.60
  -3 -12   0   96.79   29.20
  -3 -12   0  106.79   19.40
   3  12   0  104.99   34.00
   3  12   0   90.89   41.10
  -4 -12   0  293.07   30.30
  -4 -12   0  325.07   42.20
  -4 -12   0  353.26   45.50
   4  12   0  200.88   52.89
   4  12   0  304.77   44.70
  -5 -12   0  347.17   45.70
  -5 -12   0  413.36   36.30
  -5 -12   0  380.06   50.59
   5  12   0  398.06   47.20
   5  12   0  351.96   66.59
  -6 -12   0  417.46   49.50
  -6 -12   0  398.86   51.79
  -6 -12   0  411.86   39.20
   6  12   0  407.96   73.09
   6  12   0  427.76   45.40
   6  12   0  409.16   56.79
  -7 -12   0  815.82   67.19
  -7 -12   0  877.71   76.79
  -7 -12   0  807.62   56.39
   7  12   0  748.83   70.89
   7  12   0  783.02  102.39
  -8 -12   0  -13.40   27.60
  -8 -12   0   80.29   40.30
   8  12   0  -14.00   33.60
   8  12   0  -39.70   46.10
  -9 -12   0   71.69   43.40
   9  12   0  147.39   63.89
   9  12   0   44.20   40.30
 -10 -12   0   87.19   50.09
  10  12   0   21.80   39.20
  10  12   0   34.50   59.29
 -11 -12   0   38.40   52.59
  11  12   0   18.30   55.89
  11  12   0   61.29   51.79
  16 -13   0  244.78   62.99
 -16  13   0  278.67   73.29
 -16  13   0  284.17   65.79
  15 -13   0  176.38   58.39
 -15  13   0  251.77   65.19
 -15  13   0  264.57   61.99
  14 -13   0  199.78   54.19
  14 -13   0  181.58   54.09
 -14  13   0  179.48   51.79
 -14  13   0  173.58   58.09
  13 -13   0  486.75   65.89
  13 -13   0  502.85   73.09
 -13  13   0  508.05   66.29
 -13  13   0  441.46   67.39
 -13  13   0  475.45   76.39
  12 -13   0   24.00   30.00
  12 -13   0  -46.90   23.70
 -12  13   0   -9.10   28.70
 -12  13   0   18.50   32.00
 -12  13   0  -13.80   35.40
  11 -13   0    6.20   32.10
  11 -13   0   64.59   35.40
 -11  13   0    5.30   30.80
 -11  13   0   24.10   35.30
  10 -13   0  -17.00   27.20
  10 -13   0   21.60   29.50
 -10  13   0   26.70   28.00
 -10  13   0    0.60   31.20
   9 -13   0  305.77   50.49
  -9  13   0  357.16   56.99
  -9  13   0  334.27   52.39
   8 -13   0  410.06   51.59
  -8  13   0  359.06   32.20
  -8  13   0  388.56   54.99
  -8  13   0  337.67   48.90
   7 -13   0  102.09   25.20
   7 -13   0  103.69   36.10
   7 -13   0   92.39   29.80
  -7  13   0   28.10   15.90
  -7  13   0   59.99   30.90
  -7  13   0   83.89   31.70
   6 -13   0 1550.94   92.79
   6 -13   0 1471.15   76.49
   6 -13   0 1427.96   85.39
   6 -13   0 1320.87   73.09
  -6  13   0 1400.76   89.79
  -6  13   0 1411.66   86.39
   5 -13   0  549.65   56.79
   5 -13   0  517.65   56.49
   5 -13   0  466.75   56.69
   5 -13   0  574.74   45.40
  -5  13   0  562.34   57.09
  -5  13   0  641.44   53.69
   4 -13   0  368.86   44.90
   4 -13   0  400.56   41.10
   4 -13   0  316.17   46.20
  -4  13   0  289.17   41.30
  -4  13   0  339.67   34.20
  -4  13   0  364.86   44.10
   3 -13   0 1055.49   73.49
   3 -13   0 1100.69   69.09
   3 -13   0 1086.99   65.49
  -3  13   0 1089.29   67.29
  -3  13   0 1053.29   68.89
  -3  13   0 1101.09   62.49
   2 -13   0    6.90   18.90
   2 -13   0    3.80   21.60
   2 -13   0   23.70   20.30
  -2  13   0    0.10   17.70
  -2  13   0   18.70   17.90
  -2  13   0   36.40   13.80
   1 -13   0  168.68   29.60
   1 -13   0  133.19   32.70
   1 -13   0  196.18   33.00
  -1  13   0  147.89   19.00
  -1  13   0  167.48   28.30
  -1  13   0  130.19   26.30
   0 -13   0  173.28   30.70
   0 -13   0  204.18   37.70
   0  13   0  147.49   28.00
   0  13   0  158.88   39.20
   0  13   0  149.88   27.70
   0  13   0  127.29   18.50
  -1 -13   0 1235.48   73.89
  -1 -13   0 1250.07   79.49
   1  13   0 1373.26   69.19
   1  13   0 1120.69   59.79
   1  13   0 1299.97   90.89
   1  13   0 1254.37   74.89
  -2 -13   0 1714.33   91.39
  -2 -13   0 1730.03   95.59
  -2 -13   0 1584.04   75.09
   2  13   0 1458.65   75.29
   2  13   0 1622.34   90.69
   2  13   0 1862.91  111.69
  -3 -13   0   59.19   30.70
  -3 -13   0   -8.90   25.60
  -3 -13   0   52.59   19.80
   3  13   0   47.90   39.10
  -4 -13   0  219.88   40.40
  -4 -13   0  225.08   39.90
  -4 -13   0  232.68   29.10
   4  13   0  254.07   56.89
   4  13   0  175.58   40.20
  -5 -13   0   37.20   32.30
  -5 -13   0    7.10   19.30
  -5 -13   0   24.50   29.40
   5  13   0   -3.90   43.20
   5  13   0   -1.10   28.50
  -6 -13   0   24.50   22.40
  -6 -13   0   -7.30   26.50
  -6 -13   0   -5.60   31.90
   6  13   0   34.10   33.50
   6  13   0   77.19   52.89
  -7 -13   0  144.09   42.40
  -7 -13   0   98.79   37.80
   7  13   0  108.79   43.60
   7  13   0  103.59   58.89
  -8 -13   0   56.09   41.60
   8  13   0   -3.70   49.50
   8  13   0    6.30   34.30
  -9 -13   0  367.96   63.99
   9  13   0  365.66   83.49
   9  13   0  280.37   59.19
 -10 -13   0   81.39   52.59
  10  13   0   85.19   49.70
  10  13   0  192.98   67.59
  15 -14   0   98.19   52.69
 -15  14   0  122.39   53.29
 -15  14   0   -1.90   45.80
  14 -14   0   96.39   43.00
  14 -14   0   91.49   46.10
 -14  14   0   55.99   44.70
 -14  14   0   -1.90   37.10
 -14  14   0    5.80   42.80
  13 -14   0   31.40   39.20
  13 -14   0  -29.70   32.00
 -13  14   0   59.39   38.90
 -13  14   0    3.60   34.10
 -13  14   0    0.10   36.00
  12 -14   0  -17.50   28.60
  12 -14   0  -14.00   27.50
 -12  14   0   -9.20   32.80
 -12  14   0   52.39   32.60
 -12  14   0  -15.70   32.80
  11 -14   0 1037.10   90.09
  11 -14   0 1038.70   89.99
 -11  14   0 1177.18   98.19
 -11  14   0  952.70  100.89
  10 -14   0  312.57   53.39
  10 -14   0  175.68   44.50
 -10  14   0  401.36   63.49
 -10  14   0  355.56   60.49
   9 -14   0  233.18   46.00
  -9  14   0  283.37   49.20
  -9  14   0  317.77   56.29
   8 -14   0  987.00   78.79
   8 -14   0 1000.20   83.49
  -8  14   0 1124.59   85.69
  -8  14   0 1099.69   81.49
   7 -14   0   37.70   21.60
   7 -14   0   24.90   29.70
   7 -14   0   39.10   28.50
  -7  14   0   13.30   28.60
  -7  14   0  -11.70   22.00
   6 -14   0   36.10   22.00
   6 -14   0    1.00   21.40
   6 -14   0   40.90   29.40
  -6  14   0   -9.70   24.50
  -6  14   0   18.60   23.90
   5 -14   0   82.79   31.00
   5 -14   0   73.09   28.40
   5 -14   0  117.49   28.50
  -5  14   0   59.59   27.40
  -5  14   0   78.79   29.10
   4 -14   0  655.73   55.19
   4 -14   0  548.45   47.90
   4 -14   0  508.85   57.39
  -4  14   0  571.64   61.29
  -4  14   0  565.74   56.19
  -4  14   0  615.44   43.90
   3 -14   0  540.65   47.20
   3 -14   0  643.14   64.39
   3 -14   0  425.96   51.59
  -3  14   0  440.16   51.49
  -3  14   0  565.44   46.30
  -3  14   0  649.34   52.79
   2 -14   0   25.70   27.90
   2 -14   0   49.99   24.40
   2 -14   0   33.50   23.20
  -2  14   0   52.99   25.90
  -2  14   0   40.00   25.20
   1 -14   0 1378.06   78.49
   1 -14   0 1287.67   78.09
   1 -14   0 1310.37   84.69
  -1  14   0 1360.06   73.99
  -1  14   0 1219.48   61.09
  -1  14   0 1205.58   77.09
   0 -14   0   84.69   27.50
   0 -14   0  102.49   31.50
   0  14   0   21.30   27.90
   0  14   0   79.99   26.70
   0  14   0   67.89   27.40
   0  14   0   65.29   16.30
  -1 -14   0   45.60   27.80
  -1 -14   0   54.39   24.90
   1  14   0   40.50   23.10
   1  14   0   22.10   14.30
   1  14   0   11.00   33.50
   1  14   0   10.40   22.60
  -2 -14   0  -35.90   22.20
  -2 -14   0   58.69   29.40
   2  14   0   39.40   26.60
   2  14   0  -29.10   34.40
   2  14   0   12.40   22.00
  -3 -14   0   30.00   29.70
  -3 -14   0   16.30   17.70
  -3 -14   0   -8.70   25.90
   3  14   0   32.90   28.20
   3  14   0   -6.10   39.00
  -4 -14   0  392.46   54.39
  -4 -14   0  367.66   36.40
  -4 -14   0  369.26   52.29
   4  14   0  319.37   67.99
  -5 -14   0  152.48   39.70
  -5 -14   0  103.39   31.00
  -5 -14   0  133.09   42.20
   5  14   0  153.28   58.59
   5  14   0   85.39   35.50
  -6 -14   0  495.55   62.99
  -6 -14   0  559.24   62.79
   6  14   0  563.64   91.19
   6  14   0  557.24   63.19
  -7 -14   0  431.06   62.99
  -7 -14   0  325.47   50.69
   7  14   0  350.36   76.59
   7  14   0  306.67   59.09
  -8 -14   0  -30.90   39.30
   8  14   0   24.30   40.60
   8  14   0  117.59   59.69
  -9 -14   0   51.29   46.70
   9  14   0   59.89   44.70
   9  14   0   74.29   61.69
  15 -15   0  141.19   53.99
  15 -15   0  181.78   61.29
 -15  15   0  172.88   61.59
 -15  15   0  165.68   61.59
  14 -15   0   -6.60   35.90
  14 -15   0   72.99   42.50
 -14  15   0  102.99   51.49
 -14  15   0   51.29   43.00
 -14  15   0   17.50   35.60
  13 -15   0  192.38   54.39
  13 -15   0  228.78   55.29
 -13  15   0  377.66   64.49
 -13  15   0  247.78   61.49
 -13  15   0  274.37   61.49
  12 -15   0   41.90   36.30
  12 -15   0  -38.30   30.00
 -12  15   0   -6.50   35.50
 -12  15   0   23.40   38.80
  11 -15   0  117.69   43.30
  11 -15   0   69.29   35.90
 -11  15   0  117.29   48.50
 -11  15   0   84.49   39.60
  10 -15   0  -25.10   25.90
  10 -15   0    4.40   32.90
 -10  15   0   42.40   39.90
 -10  15   0    0.00   28.80
   9 -15   0  130.39   40.40
  -9  15   0  163.38   41.80
  -9  15   0  163.38   48.00
   8 -15   0  240.88   50.69
   8 -15   0  220.48   41.10
   8 -15   0  166.48   31.90
  -8  15   0  166.88   45.10
  -8  15   0  227.98   45.60
   7 -15   0  -13.90   21.30
   7 -15   0   15.20   30.90
   7 -15   0   32.10   28.30
  -7  15   0   -0.50   27.50
  -7  15   0   25.00   26.20
   6 -15   0 2090.49  116.99
   6 -15   0 1980.50  120.49
   6 -15   0 2232.88  106.89
  -6  15   0 2139.69  120.19
   5 -15   0  411.36   44.70
   5 -15   0  323.77   48.10
   5 -15   0  335.97   53.79
  -5  15   0  389.06   51.49
  -5  15   0  364.96   49.40
   4 -15   0  272.97   39.00
   4 -15   0  148.69   35.60
   4 -15   0  206.18   41.80
  -4  15   0  232.28   40.60
  -4  15   0  230.98   40.30
  -4  15   0  269.37   34.60
   3 -15   0  130.59   31.00
   3 -15   0  113.59   36.90
   3 -15   0   44.00   25.90
  -3  15   0  118.29   31.40
  -3  15   0   83.89   27.40
  -3  15   0   91.49   29.00
   2 -15   0   72.39   26.50
   2 -15   0   33.90   24.90
   2 -15   0   54.59   28.90
  -2  15   0   15.70   25.40
  -2  15   0   32.30   23.00
   1 -15   0  164.48   33.50
   1 -15   0  143.59   38.20
   1 -15   0  177.38   36.10
  -1  15   0  181.78   33.70
  -1  15   0  117.59   29.60
   0 -15   0  161.18   38.40
   0 -15   0  121.39   36.50
   0 -15   0   82.69   29.90
   0  15   0  143.59   30.40
   0  15   0   94.59   30.70
  -1 -15   0  780.62   64.79
  -1 -15   0  754.72   72.49
   1  15   0  832.32   57.39
   1  15   0  881.61   65.69
   1  15   0  636.14   76.29
  -2 -15   0  333.17   45.20
  -2 -15   0  229.88   44.60
   2  15   0  391.16   66.79
   2  15   0  319.97   46.10
   2  15   0  434.76   44.00
  -3 -15   0   48.60   31.10
  -3 -15   0    4.70   28.40
   3  15   0    9.30   25.90
   3  15   0   -5.80   39.30
  -4 -15   0  121.59   37.20
  -4 -15   0  142.89   41.30
   4  15   0  158.78   56.59
  -5 -15   0   67.29   39.00
  -5 -15   0  -17.60   29.80
   5  15   0   70.19   37.50
   5  15   0    8.80   53.69
  -6 -15   0  -69.09   30.00
  -6 -15   0  -38.60   33.20
   6  15   0  -24.60   52.09
   6  15   0   -7.80   33.20
  -7 -15   0   31.30   43.60
  -7 -15   0  112.19   48.40
   7  15   0   49.50   57.39
   7  15   0   25.20   44.40
  -8 -15   0   -6.60   42.90
   8  15   0   15.00   44.10
   8  15   0   91.99   66.69
  -9 -15   0  150.58   57.29
   9  15   0  193.48   74.89
   9  15   0  192.38   60.19
  15 -16   0  -40.00   37.90
  15 -16   0  164.98   56.49
 -15  16   0   -1.20   46.20
 -15  16   0   10.30   42.70
  14 -16   0  -63.89   34.90
  14 -16   0   12.50   37.40
 -14  16   0    6.30   44.10
 -14  16   0   28.40   41.20
 -14  16   0   25.10   42.20
  13 -16   0   81.99   43.90
  13 -16   0   29.40   39.90
 -13  16   0   98.99   52.29
 -13  16   0   42.50   39.80
 -13  16   0   36.70   42.30
  12 -16   0   18.60   32.50
  12 -16   0    6.40   34.30
 -12  16   0   -5.80   33.30
 -12  16   0  -61.89   32.60
  11 -16   0  929.71  100.19
  11 -16   0  954.90   98.59
 -11  16   0 1219.58  103.49
 -11  16   0 1054.99  105.69
  10 -16   0  180.88   51.09
  10 -16   0  202.48   49.50
 -10  16   0  424.36   66.59
 -10  16   0  241.38   52.39
   9 -16   0  239.48   50.79
  -9  16   0  210.68   54.39
  -9  16   0  167.28   45.80
   8 -16   0   35.40   34.50
   8 -16   0   16.60   26.90
   8 -16   0    5.00   23.20
  -8  16   0   36.70   33.70
  -8  16   0   31.00   30.20
   7 -16   0   15.20   24.30
   7 -16   0  -16.60   23.30
   7 -16   0    9.20   31.70
  -7  16   0   43.90   27.80
  -7  16   0  -36.90   28.90
   6 -16   0   24.20   28.40
   6 -16   0   13.50   24.10
   6 -16   0   15.10   31.50
  -6  16   0   54.59   28.70
  -6  16   0   48.10   33.70
   5 -16   0   28.50   30.00
   5 -16   0   67.19   34.90
   5 -16   0   72.29   28.00
  -5  16   0   21.10   29.60
  -5  16   0   94.19   32.40
  -5  16   0   78.39   25.60
   4 -16   0  509.35   59.89
   4 -16   0  583.94   56.09
   4 -16   0  606.14   66.89
  -4  16   0  550.84   48.70
  -4  16   0  697.13   64.99
  -4  16   0  487.05   61.39
   3 -16   0  367.06   48.00
   3 -16   0  247.28   41.00
   3 -16   0  330.27   53.89
  -3  16   0  408.36   46.50
  -3  16   0  265.77   41.70
  -3  16   0  349.96   47.00
   2 -16   0   -4.90   28.00
   2 -16   0   18.10   26.60
   2 -16   0   19.30   27.20
  -2  16   0   24.80   27.50
  -2  16   0    7.20   23.10
  -2  16   0   15.40   25.60
   1 -16   0  871.71   71.09
   1 -16   0  886.91   71.09
   1 -16   0 1127.19   82.69
  -1  16   0 1032.40   69.29
  -1  16   0 1002.20   72.59
   0 -16   0  317.87   50.49
   0 -16   0  230.18   42.90
   0 -16   0  250.17   41.10
   0  16   0  325.37   41.60
   0  16   0  246.18   40.20
  -1 -16   0  172.58   38.30
  -1 -16   0  136.09   39.60
   1  16   0  217.68   35.40
   1  16   0  183.88   41.00
   1  16   0  127.59   48.50
  -2 -16   0    9.70   30.40
  -2 -16   0   40.00   30.00
   2  16   0   -9.20   25.10
   2  16   0   14.10   43.80
   2  16   0    4.30   26.10
  -3 -16   0   36.10   31.80
  -3 -16   0   -6.10   31.30
   3  16   0   40.90   44.20
   3  16   0   19.80   30.40
   3  16   0   46.10   27.60
  -4 -16   0  350.96   55.99
  -4 -16   0  502.95   63.29
   4  16   0  499.35   83.59
   4  16   0  382.16   54.49
  -5 -16   0   92.69   38.40
  -5 -16   0   77.69   38.60
   5  16   0   51.49   54.59
  -6 -16   0  399.16   68.99
  -6 -16   0  542.55   65.99
   6  16   0  281.37   73.89
  -7 -16   0  195.88   57.49
   7  16   0  153.08   50.19
   7  16   0  272.27   79.59
  -8 -16   0  -14.40   48.40
   8  16   0  -29.30   40.10
   8  16   0   32.00   62.89
  14 -17   0   33.30   43.10
  14 -17   0    5.40   40.50
 -14  17   0  101.79   54.59
 -14  17   0   56.09   47.60
 -14  17   0   13.40   42.90
  13 -17   0  101.19   48.00
  13 -17   0  149.29   51.29
 -13  17   0  143.79   50.19
 -13  17   0  101.49   48.00
 -13  17   0  145.99   55.79
  12 -17   0   38.30   38.80
  12 -17   0   46.30   36.60
 -12  17   0    4.90   35.00
 -12  17   0   -8.60   38.10
  11 -17   0   99.09   42.10
  11 -17   0   66.79   42.20
 -11  17   0   93.49   52.09
 -11  17   0   42.70   36.70
  10 -17   0   23.80   31.40
 -10  17   0   -9.40   31.20
 -10  17   0   89.79   46.90
   9 -17   0  -22.00   29.20
  -9  17   0   21.90   38.00
  -9  17   0   44.90   32.70
   8 -17   0  127.09   32.70
   8 -17   0  152.18   44.90
   8 -17   0  109.59   42.70
  -8  17   0  187.88   47.10
  -8  17   0  154.78   42.00
   7 -17   0  215.88   51.59
   7 -17   0  174.78   37.70
   7 -17   0  115.29   37.10
  -7  17   0  104.49   36.60
  -7  17   0  191.98   46.30
   6 -17   0 1319.07  100.19
   6 -17   0 1470.15   97.69
   6 -17   0 1330.37   83.99
  -6  17   0 1283.97   93.09
  -6  17   0 1477.85   98.59
   5 -17   0  221.58   39.40
   5 -17   0  220.58   44.40
   5 -17   0  230.58   48.20
  -5  17   0  247.38   47.70
  -5  17   0  194.28   40.80
  -5  17   0  200.88   35.40
   4 -17   0  215.68   47.30
   4 -17   0  210.18   39.50
  -4  17   0   98.69   35.00
  -4  17   0  218.78   35.80
  -4  17   0  252.57   45.20
   3 -17   0   39.30   33.00
   3 -17   0   31.90   30.30
   3 -17   0   69.89   32.10
  -3  17   0   48.80   27.60
  -3  17   0   69.49   32.70
  -3  17   0   31.50   29.80
   2 -17   0    6.70   28.70
   2 -17   0    2.80   31.90
   2 -17   0   -0.70   26.70
  -2  17   0    0.30   27.70
  -2  17   0   35.00   27.00
  -2  17   0   -1.60   24.00
   1 -17   0  381.16   52.59
   1 -17   0  427.76   62.59
   1 -17   0  504.75   57.79
  -1  17   0  447.66   57.59
  -1  17   0  423.16   51.69
   0 -17   0   55.69   31.30
   0 -17   0   91.59   40.60
   0 -17   0  108.59   37.70
   0  17   0   66.99   30.50
   0  17   0   56.49   32.50
  -1 -17   0  517.75   65.79
  -1 -17   0  487.55   58.49
  -1 -17   0  411.06   60.19
   1  17   0  510.05   63.09
   1  17   0  581.84   81.99
   1  17   0  621.04   57.99
  -2 -17   0  186.38   44.70
  -2 -17   0  275.07   47.00
   2  17   0  156.18   34.00
   2  17   0  102.29   54.19
   2  17   0  123.59   38.80
  -3 -17   0   29.70   34.40
  -3 -17   0   -0.70   33.00
   3  17   0  -12.70   26.00
   3  17   0   -2.80   28.80
   3  17   0   57.19   55.29
  -4 -17   0  222.38   46.60
  -4 -17   0  217.88   51.09
   4  17   0  136.19   38.30
   4  17   0  319.87   75.29
  -5 -17   0   41.00   41.50
  -5 -17   0   72.89   41.30
   5  17   0    3.50   55.09
   5  17   0   13.10   35.00
  -6 -17   0   -2.00   39.10
  -6 -17   0   71.29   46.10
   6  17   0  133.69   69.49
  -7 -17   0   28.80   50.59
   7  17   0  118.49   66.59
  14 -18   0  -10.20   38.40
  14 -18   0  -65.19   37.00
 -14  18   0   -2.10   45.60
 -14  18   0   30.20   42.80
 -14  18   0  -53.79   37.60
  13 -18   0  133.39   51.79
  13 -18   0   15.90   44.70
 -13  18   0  161.08   57.49
 -13  18   0  113.29   53.19
 -13  18   0   17.40   42.60
  12 -18   0   45.70   43.80
  12 -18   0   27.30   38.10
 -12  18   0   38.60   43.60
 -12  18   0   16.10   37.80
  11 -18   0  790.32   96.19
  11 -18   0  982.80   97.29
 -11  18   0 1241.58  119.79
 -11  18   0  764.72   88.69
  10 -18   0   61.39   40.10
 -10  18   0   45.10   41.20
 -10  18   0  134.59   52.39
   9 -18   0   33.60   42.50
   9 -18   0   20.80   34.80
  -9  18   0   -3.40   39.40
  -9  18   0   58.19   36.90
   8 -18   0   18.40   33.80
   8 -18   0   45.70   42.50
  -8  18   0   51.39   40.10
  -8  18   0   66.99   41.30
   7 -18   0  -11.80   34.60
   7 -18   0  -14.20   26.20
   7 -18   0  -19.30   27.80
  -7  18   0   11.00   29.80
  -7  18   0  -33.00   35.00
   6 -18   0   53.19   32.80
   6 -18   0   40.20   38.10
   6 -18   0   13.00   26.50
  -6  18   0   22.30   34.90
  -6  18   0   15.10   29.60
   5 -18   0   25.70   36.50
   5 -18   0   50.49   31.80
   5 -18   0   35.50   30.40
  -5  18   0  127.79   43.10
  -5  18   0   27.30   27.00
  -5  18   0   -2.40   29.00
   4 -18   0  521.85   69.79
   4 -18   0  282.47   48.70
   4 -18   0  371.56   50.89
  -4  18   0  404.16   48.30
  -4  18   0  512.95   60.69
  -4  18   0  288.67   49.80
   3 -18   0  113.69   37.90
   3 -18   0   91.29   36.90
   3 -18   0  129.29   43.20
  -3  18   0  175.08   40.10
  -3  18   0   85.79   33.80
  -3  18   0   77.79   35.20
   2 -18   0  117.69   37.40
   2 -18   0   35.40   37.80
   2 -18   0   78.19   36.90
  -2  18   0   96.59   32.50
  -2  18   0   85.59   34.60
  -2  18   0   96.69   36.90
   1 -18   0  424.76   62.59
   1 -18   0  436.06   58.89
   1 -18   0  375.26   52.09
  -1  18   0  327.47   50.39
  -1  18   0  435.66   52.39
   0 -18   0   75.59   38.60
   0 -18   0  124.19   41.30
   0 -18   0   96.39   36.90
   0  18   0   49.80   30.10
   0  18   0  123.39   35.70
  -1 -18   0  -34.50   35.30
  -1 -18   0  -11.60   29.40
  -1 -18   0  -34.80   30.10
   1  18   0   52.99   29.10
   1  18   0  -10.10   30.50
  -2 -18   0  -46.90   31.60
  -2 -18   0    3.30   32.10
  -2 -18   0  -36.40   34.90
   2  18   0  -22.40   29.90
   2  18   0   16.20   29.50
   2  18   0    3.40   49.00
  -3 -18   0  -14.40   35.00
  -3 -18   0   55.89   37.20
   3  18   0   23.80   49.30
   3  18   0    5.20   27.50
  -4 -18   0  327.77   59.09
  -4 -18   0  237.98   51.39
   4  18   0  186.58   43.40
   4  18   0  305.87   83.29
  -5 -18   0   40.60   41.70
  -5 -18   0  -30.10   36.90
   5  18   0   31.80   38.50
   5  18   0  132.69   67.09
  -6 -18   0  169.68   55.69
   6  18   0  125.09   46.70
   6  18   0  203.58   75.29
  14 -19   0   -0.90   42.50
  14 -19   0   61.69   45.00
 -14  19   0   30.20   52.19
 -14  19   0  102.49   59.59
 -14  19   0    8.70   44.50
  13 -19   0   44.60   44.60
  13 -19   0   18.70   46.60
 -13  19   0   49.50   44.70
 -13  19   0  -16.70   46.00
  12 -19   0   34.60   38.90
  12 -19   0    9.20   38.00
 -12  19   0    0.20   38.10
 -12  19   0    5.90   46.10
  11 -19   0    0.60   38.80
  11 -19   0  -21.10   34.50
 -11  19   0  -34.80   32.10
 -11  19   0  104.19   51.19
  10 -19   0    4.40   35.00
 -10  19   0    0.80   43.60
 -10  19   0  -15.90   34.10
   9 -19   0  177.68   56.29
   9 -19   0  156.38   48.10
  -9  19   0  139.19   51.09
  -9  19   0  117.69   51.59
   8 -19   0  140.19   47.90
   8 -19   0  143.89   52.29
  -8  19   0  257.87   53.89
  -8  19   0  115.49   47.50
   7 -19   0  198.68   53.39
   7 -19   0  188.48   41.50
   7 -19   0  177.18   46.30
  -7  19   0  166.28   48.80
  -7  19   0  163.68   47.50
   6 -19   0  825.32   71.49
   6 -19   0  822.82   89.69
   6 -19   0  833.62   83.49
  -6  19   0  750.32   83.19
  -6  19   0  953.80   83.19
   5 -19   0  106.29   40.40
   5 -19   0   90.89   45.10
   5 -19   0  130.99   37.50
  -5  19   0  136.09   43.10
  -5  19   0   98.29   39.20
  -5  19   0  137.59   33.60
   4 -19   0   29.50   39.50
   4 -19   0   47.00   35.40
   4 -19   0    5.90   29.70
  -4  19   0   -8.30   26.70
  -4  19   0   40.20   31.10
  -4  19   0   59.49   35.00
   3 -19   0   66.09   38.80
   3 -19   0   48.50   36.20
   3 -19   0    5.70   29.00
  -3  19   0   35.30   34.70
  -3  19   0   27.00   30.90
  -3  19   0   -1.20   30.10
   2 -19   0   -3.50   32.60
   2 -19   0  -19.20   28.80
   2 -19   0    6.60   38.80
  -2  19   0   46.70   30.50
  -2  19   0   66.79   33.80
  -2  19   0    3.60   32.70
   1 -19   0   48.50   39.30
   1 -19   0  190.78   43.10
   1 -19   0  117.19   46.50
  -1  19   0  166.38   42.20
  -1  19   0  130.99   36.60
   0 -19   0    0.60   32.20
   0 -19   0   37.90   38.00
   0 -19   0  130.89   45.50
   0  19   0   80.29   33.30
   0  19   0   40.40   33.90
  -1 -19   0  499.05   68.79
  -1 -19   0  539.25   70.79
  -1 -19   0  513.85   63.09
   1  19   0  432.36   63.29
  -2 -19   0   37.90   38.90
  -2 -19   0  113.29   45.90
  -2 -19   0   81.19   46.70
   2  19   0   71.49   36.00
  -3 -19   0   41.50   45.50
  -3 -19   0   19.10   39.00
  -3 -19   0   91.89   44.50
   3  19   0   69.69   62.19
   3  19   0  -17.20   33.00
  -4 -19   0  166.28   51.99
  -4 -19   0  146.19   44.90
   4  19   0   83.69   40.80
   4  19   0  219.98   73.69
  -5 -19   0   21.50   42.00
  -5 -19   0  104.59   45.40
   5  19   0   -3.30   41.90
   5  19   0  104.79   68.29
  13 -20   0   42.50   47.70
  13 -20   0  117.69   53.49
 -13  20   0   71.89   56.29
 -13  20   0  -69.89   33.70
  12 -20   0   -7.70   37.50
  12 -20   0  -21.80   37.50
 -12  20   0    0.00   49.10
 -12  20   0   75.89   51.49
  11 -20   0  545.55   78.79
  11 -20   0  507.35   86.29
 -11  20   0  462.75   74.89
 -11  20   0  657.73   92.59
  10 -20   0  -36.40   38.50
 -10  20   0  -19.50   36.10
 -10  20   0   23.60   46.60
   9 -20   0   77.69   43.40
   9 -20   0   56.19   50.69
  -9  20   0  111.09   47.40
  -9  20   0   62.59   41.50
   8 -20   0    8.60   40.50
   8 -20   0   13.50   45.00
  -8  20   0   28.10   41.10
  -8  20   0   73.49   39.00
   7 -20   0   15.60   31.80
   7 -20   0   32.80   43.70
  -7  20   0  -56.29   34.30
  -7  20   0   35.10   36.50
   6 -20   0   20.30   36.40
   6 -20   0   43.50   42.80
   6 -20   0   70.59   36.00
  -6  20   0   -4.00   31.40
  -6  20   0   16.30   38.00
   5 -20   0  -16.80   33.60
   5 -20   0   16.40   32.60
   5 -20   0  -28.70   35.70
  -5  20   0    2.10   33.50
  -5  20   0  -18.90   31.90
   4 -20   0  388.36   56.89
   4 -20   0  297.47   55.29
   4 -20   0  250.27   58.99
  -4  20   0  201.18   52.69
  -4  20   0  367.76   51.39
  -4  20   0  425.76   58.89
   3 -20   0  252.17   49.90
   3 -20   0  291.47   58.99
   3 -20   0  160.68   45.70
  -3  20   0  109.89   43.50
  -3  20   0  262.37   48.90
  -3  20   0  227.48   49.10
   2 -20   0   76.09   41.30
   2 -20   0  130.19   48.20
   2 -20   0  119.29   40.20
  -2  20   0   97.29   40.20
  -2  20   0   31.30   35.00
  -2  20   0   74.69   35.50
   1 -20   0  254.57   49.99
   1 -20   0  257.77   55.69
   1 -20   0  249.58   56.59
  -1  20   0  273.57   56.69
  -1  20   0  203.78   45.50
  -1  20   0  301.37   56.29
   0 -20   0   66.79   38.50
   0 -20   0   66.09   43.90
   0 -20   0   57.89   46.10
   0  20   0   -5.10   29.10
  -1 -20   0   32.70   34.40
  -1 -20   0    8.90   36.70
  -1 -20   0    7.90   38.90
   1  20   0  -14.10   30.70
  -2 -20   0    9.80   36.10
  -2 -20   0  -30.00   43.40
  -2 -20   0  -51.79   37.00
   2  20   0  -20.70   33.80
  -3 -20   0   49.50   50.59
  -3 -20   0  107.09   50.69
  -3 -20   0  121.69   51.49
   3  20   0   67.79   39.00
  -4 -20   0  183.18   64.89
  -4 -20   0  201.08   56.89
  -4 -20   0   85.79   45.90
   4  20   0  121.49   50.29
   4  20   0  347.67   87.79
  12 -21   0   38.30   47.60
  12 -21   0  -57.09   39.00
 -12  21   0   20.60   50.99
 -12  21   0   -1.10   49.30
  11 -21   0   63.29   47.30
  11 -21   0  -26.20   39.50
 -11  21   0  -15.50   46.00
 -11  21   0   14.20   42.30
  10 -21   0    0.20   39.10
 -10  21   0   -7.30   39.20
 -10  21   0   10.50   46.30
   9 -21   0  116.49   53.09
   9 -21   0   75.59   44.70
  -9  21   0  100.79   54.59
  -9  21   0  118.79   45.00
   8 -21   0   58.39   42.20
   8 -21   0  151.88   63.09
  -8  21   0   77.89   42.10
  -8  21   0  170.78   55.29
   7 -21   0  169.78   50.49
   7 -21   0  242.48   62.39
  -7  21   0  278.37   60.99
  -7  21   0  115.79   45.60
   6 -21   0  490.65   77.79
   6 -21   0  333.87   60.79
  -6  21   0  180.98   50.69
  -6  21   0  543.45   72.29
   5 -21   0    1.30   37.40
   5 -21   0  -60.39   32.10
   5 -21   0  -21.80   34.00
  -5  21   0   41.80   39.40
  -5  21   0  -70.29   27.80
   4 -21   0   21.70   35.00
   4 -21   0   17.40   37.50
   4 -21   0   18.30   52.19
  -4  21   0  -19.10   29.60
  -4  21   0   39.40   41.00
   3 -21   0   -8.10   38.00
   3 -21   0   23.60   35.00
   3 -21   0   19.10   44.60
  -3  21   0   15.00   34.70
  -3  21   0   37.40   33.50
  -3  21   0   21.00   35.40
   2 -21   0  134.29   42.40
   2 -21   0  176.68   52.89
   2 -21   0  152.88   48.80
  -2  21   0  111.99   41.30
  -2  21   0  166.48   52.39
   1 -21   0  384.46   70.39
   1 -21   0  278.77   57.69
   1 -21   0  242.38   51.89
  -1  21   0  211.68   50.29
  -1  21   0  453.25   69.89
   0 -21   0  -16.90   40.60
   0 -21   0   64.39   39.50
   0 -21   0   67.09   45.00
   0  21   0   30.90   33.50
   0  21   0   33.00   45.50
  -1 -21   0  168.48   55.79
  -1 -21   0  302.77   64.99
  -1 -21   0   98.79   42.70
   1  21   0  138.29   42.20
  -2 -21   0  115.09   49.00
  -2 -21   0  130.19   53.79
  -2 -21   0  171.08   53.99
   2  21   0   47.30   42.20
  -3 -21   0   65.49   52.79
  -3 -21   0   17.40   43.10
  -3 -21   0   30.20   47.20
   3  21   0  -11.60   37.80
  11 -22   0  338.77   71.59
  11 -22   0  329.47   70.59
 -11  22   0  317.27   68.09
 -11  22   0  337.77   78.49
  10 -22   0   39.10   48.80
 -10  22   0   37.70   45.00
 -10  22   0   35.30   53.89
   9 -22   0   51.49   50.29
   9 -22   0   92.89   60.19
  -9  22   0   19.00   38.40
  -9  22   0  123.19   60.59
   8 -22   0   50.59   54.99
   8 -22   0  122.19   50.99
  -8  22   0   53.79   41.30
  -8  22   0  125.99   53.39
   7 -22   0  -31.30   36.20
   7 -22   0    8.60   48.70
  -7  22   0   14.90   37.30
  -7  22   0  -34.70   40.40
   6 -22   0  -21.10   41.00
   6 -22   0   22.80   45.80
  -6  22   0  -20.90   34.90
  -6  22   0   57.09   45.60
   5 -22   0  -24.00   41.90
   5 -22   0  -10.50   38.00
   5 -22   0   42.70   47.10
  -5  22   0  -10.90   37.00
  -5  22   0    4.00   38.50
   4 -22   0  169.28   49.50
   4 -22   0  240.98   63.69
   4 -22   0  128.69   45.60
  -4  22   0  203.18   51.59
   3 -22   0   95.69   50.19
   3 -22   0  130.69   47.40
   3 -22   0  166.68   52.09
  -3  22   0   91.39   41.80
   2 -22   0   79.69   44.70
   2 -22   0   81.69   46.90
   2 -22   0   19.60   37.20
  -2  22   0   36.30   37.50
  -2  22   0   -7.40   40.50
   1 -22   0  124.79   46.20
   1 -22   0  168.98   54.29
   1 -22   0  151.28   52.39
  -1  22   0   76.19   43.90
  -1  22   0  223.68   58.19
   0 -22   0   59.09   47.80
   0 -22   0   47.80   41.00
   0 -22   0   49.90   49.10
   0  22   0   43.30   46.80
   0  22   0   50.69   37.10
  -1 -22   0   -5.00   35.00
  -1 -22   0   12.50   49.00
  -1 -22   0    7.60   44.50
   1  22   0  -19.00   32.60
  -2 -22   0  -14.70   44.40
  -2 -22   0    4.70   41.80
  -2 -22   0   16.00   47.30
   2  22   0  -13.10   34.40
  10 -23   0   24.30   47.60
 -10  23   0    8.70   52.69
 -10  23   0   30.90   46.30
   9 -23   0   26.10   56.39
   9 -23   0   27.80   50.79
  -9  23   0   50.69   43.90
  -9  23   0   21.40   51.59
   8 -23   0  -73.19   45.30
   8 -23   0  103.49   54.79
  -8  23   0  124.69   56.59
  -8  23   0  138.89   56.29
   7 -23   0  182.38   67.29
   7 -23   0  128.99   54.19
  -7  23   0  313.17   65.99
  -7  23   0   77.79   44.70
   6 -23   0  124.59   54.69
   6 -23   0  268.57   68.29
  -6  23   0  119.59   47.40
   5 -23   0    5.00   47.00
   5 -23   0  -78.09   39.20
  -5  23   0  -14.20   37.60
   4 -23   0   95.79   46.50
   4 -23   0   -2.50   51.59
   4 -23   0   -7.70   43.10
  -4  23   0    9.20   37.00
   3 -23   0  -15.70   44.00
   3 -23   0   12.30   49.20
   3 -23   0  -58.19   37.50
  -3  23   0   -6.20   36.60
   2 -23   0   85.39   55.09
   2 -23   0   36.20   43.00
   2 -23   0  198.68   56.59
  -2  23   0   61.99   44.50
   1 -23   0  193.68   58.69
   1 -23   0  203.38   60.99
   1 -23   0  149.09   48.50
  -1  23   0  101.49   43.70
  -1  23   0  103.59   57.69
   0 -23   0   85.69   49.90
   0 -23   0  -15.90   38.40
   0 -23   0   54.29   48.70
   0  23   0   24.20   53.09
   0  23   0   61.89   42.60
   8 -24   0   44.70   49.40
   8 -24   0  108.19   63.89
  -8  24   0   56.59   47.20
   7 -24   0  103.89   61.19
   7 -24   0   70.49   51.79
  -7  24   0   35.30   43.10
   6 -24   0   68.29   55.69
   6 -24   0  -37.00   42.50
  -6  24   0  -16.40   39.30
   5 -24   0  -66.69   43.90
   5 -24   0   76.39   56.69
  -5  24   0  -32.20   42.10
   4 -24   0   87.19   48.10
   4 -24   0  107.29   56.59
  -4  24   0   69.39   45.20
   3 -24   0   42.90   58.09
   3 -24   0   92.39   57.59
   3 -24   0   71.49   49.10
  -3  24   0   91.69   43.80
   2 -24   0   48.90   49.60
   2 -24   0  -33.20   40.60
   2 -24   0   36.90   57.69
  -2  24   0  -20.30   35.80
  -1  24  -1  -34.10   57.69
   1 -24   1   97.79   51.79
  -2  24  -1   92.19   49.10
   2 -24   1  149.19   60.29
   2 -24   1  129.79   53.69
   2 -24   1  126.29   51.39
  -3  24  -1   77.09   45.50
   3 -24   1  -20.80   46.90
   3 -24   1  100.29   58.79
  -4  24  -1  -55.59   36.70
   4 -24   1   -1.70   43.00
   4 -24   1    1.60   53.09
  -5  24  -1   68.29   49.60
   5 -24   1   28.20   49.20
   5 -24   1   -1.20   48.60
  -6  24  -1    2.70   42.20
   6 -24   1  -28.80   48.70
   6 -24   1  -14.50   43.10
  -7  24  -1   93.29   53.79
   7 -24   1   18.60   48.90
   7 -24   1   98.09   60.39
  -8  24  -1  -16.10   43.20
   8 -24   1   12.30   49.30
   8 -24   1  -69.49   50.69
  -9  24  -1   40.20   54.79
   9 -24   1  -76.49   44.40
   9 -24   1   44.10   56.79
   1  23  -1   11.70   35.60
   1  23  -1  -33.10   50.09
  -1 -23   1    6.80   49.60
  -1 -23   1  -37.10   39.10
  -1 -23   1  -41.40   46.10
   0  23  -1  131.09   54.49
   0  23  -1  105.39   45.70
   0 -23   1  161.08   60.89
   0 -23   1  123.29   49.99
   0 -23   1   43.50   48.80
  -1  23  -1   23.00   47.30
  -1  23  -1    2.50   36.90
   1 -23   1  195.08   55.89
   1 -23   1  102.79   47.80
   1 -23   1   62.09   48.00
  -2  23  -1    6.00   47.00
  -2  23  -1  -27.20   36.50
   2 -23   1   15.20   47.60
   2 -23   1   46.10   42.00
   2 -23   1   78.09   48.60
  -3  23  -1  -11.90   34.80
   3 -23   1  -54.59   39.90
   3 -23   1  123.09   58.29
   3 -23   1    3.40   41.80
  -4  23  -1  -29.80   36.20
   4 -23   1  -29.10   35.90
   4 -23   1   -7.30   47.00
  -5  23  -1   76.29   44.90
   5 -23   1  285.07   69.09
   5 -23   1  200.18   57.29
  -6  23  -1   39.10   39.20
   6 -23   1   11.20   51.29
   6 -23   1  -43.70   39.80
  -7  23  -1   84.49   53.29
   7 -23   1  123.19   52.19
   7 -23   1  170.58   64.79
  -8  23  -1   94.09   46.60
  -8  23  -1  139.39   56.29
   8 -23   1  167.48   63.89
   8 -23   1   73.29   50.89
  -9  23  -1   95.49   55.09
  -9  23  -1   34.40   44.90
   9 -23   1   77.69   55.49
   9 -23   1   81.59   60.99
 -10  23  -1  -34.70   49.20
 -10  23  -1  -12.10   42.00
  10 -23   1  -46.20   42.30
   2  22  -1   27.50   38.90
  -2 -22   1  -18.80   43.50
  -2 -22   1   36.90   48.30
  -2 -22   1    7.30   46.80
   1  22  -1   -9.40   47.50
   1  22  -1  -22.10   33.30
  -1 -22   1   22.60   47.50
  -1 -22   1   37.80   40.90
  -1 -22   1  -34.30   42.50
   0  22  -1  144.49   43.30
   0  22  -1  129.09   51.29
   0 -22   1  107.29   43.60
   0 -22   1  269.47   65.49
   0 -22   1  124.99   48.20
  -1  22  -1   54.19   36.40
  -1  22  -1    4.80   43.90
   1 -22   1  -11.90   33.60
   1 -22   1   78.79   54.99
   1 -22   1   67.59   48.10
  -2  22  -1  200.68   47.50
  -2  22  -1  302.07   59.39
   2 -22   1  292.27   59.19
   2 -22   1  367.26   67.59
   2 -22   1  280.77   56.79
  -3  22  -1   67.39   40.70
  -3  22  -1    8.80   37.10
   3 -22   1  118.19   45.30
   3 -22   1   62.79   43.70
   3 -22   1  142.39   52.19
  -4  22  -1   80.49   39.00
   4 -22   1   53.59   42.50
   4 -22   1  -20.10   43.30
   4 -22   1   28.60   40.00
  -5  22  -1   83.09   47.20
   5 -22   1   22.80   37.40
   5 -22   1   55.09   48.10
  -6  22  -1   10.10   41.90
  -6  22  -1   -8.30   37.10
   6 -22   1   35.90   49.00
   6 -22   1   10.10   41.30
  -7  22  -1  135.99   52.99
  -7  22  -1   92.39   45.70
   7 -22   1   42.10   42.20
   7 -22   1  144.39   55.39
  -8  22  -1   73.89   48.30
  -8  22  -1   86.99   49.20
   8 -22   1   21.00   42.80
   8 -22   1  -25.90   45.30
  -9  22  -1  213.48   62.89
  -9  22  -1  118.19   51.49
   9 -22   1  158.38   65.09
   9 -22   1  157.98   57.59
 -10  22  -1  351.66   74.79
 -10  22  -1   77.59   47.00
  10 -22   1  216.58   63.79
 -11  22  -1   56.29   55.19
 -11  22  -1   74.99   58.69
  11 -22   1  -38.90   42.80
   3  21  -1  182.98   53.09
  -3 -21   1  180.58   58.29
  -3 -21   1  155.78   53.69
  -3 -21   1  179.28   55.29
   2  21  -1   73.69   45.10
  -2 -21   1  151.58   55.19
  -2 -21   1   87.99   44.10
  -2 -21   1   89.49   48.50
   1  21  -1   85.09   44.00
  -1 -21   1   50.19   40.10
  -1 -21   1   68.39   46.20
  -1 -21   1  118.39   50.69
   0  21  -1  228.48   49.50
   0  21  -1  238.28   61.69
   0 -21   1  263.37   60.19
   0 -21   1  313.57   58.29
   0 -21   1  140.19   45.30
  -1  21  -1  125.79   49.70
  -1  21  -1   68.89   36.70
   1 -21   1    2.70   43.00
   1 -21   1   39.50   39.40
   1 -21   1   46.60   44.00
  -2  21  -1   95.69   45.80
  -2  21  -1   68.29   36.60
   2 -21   1  104.49   43.80
   2 -21   1   57.89   47.80
   2 -21   1   49.80   35.70
  -3  21  -1   69.89   37.20
  -3  21  -1  -22.60   31.20
   3 -21   1   20.60   36.70
   3 -21   1   54.29   39.00
   3 -21   1  120.29   49.00
  -4  21  -1   48.40   35.90
  -4  21  -1  135.49   41.60
  -4  21  -1   50.69   39.00
   4 -21   1  111.99   42.60
   4 -21   1   38.00   38.20
   4 -21   1   57.19   46.40
  -5  21  -1  254.47   51.79
  -5  21  -1   79.89   43.00
   5 -21   1  206.08   52.79
   5 -21   1  236.28   59.49
   5 -21   1  262.77   48.40
  -6  21  -1  -20.90   32.00
  -6  21  -1  -31.30   36.40
   6 -21   1  -52.89   33.40
   6 -21   1   41.00   47.30
  -7  21  -1  215.38   55.29
  -7  21  -1  153.28   49.80
   7 -21   1  238.28   58.89
   7 -21   1  116.89   46.50
  -8  21  -1   23.80   40.30
  -8  21  -1   57.19   45.80
   8 -21   1  -26.30   45.10
   8 -21   1   40.90   42.30
  -9  21  -1   27.60   48.00
  -9  21  -1   -2.60   40.00
   9 -21   1   38.70   47.20
   9 -21   1   40.00   40.50
 -10  21  -1   30.90   48.20
 -10  21  -1  -16.60   45.70
  10 -21   1  -37.30   33.90
 -11  21  -1   -7.10   46.50
 -11  21  -1  -13.60   43.40
  11 -21   1   53.49   45.20
 -12  21  -1  206.28   73.29
 -12  21  -1  112.49   55.39
  12 -21   1  128.39   52.89
  12 -21   1  179.28   60.49
   5  20  -1  210.28   84.59
   5  20  -1  225.98   56.69
  -5 -20   1  251.57   58.99
  -5 -20   1  165.58   54.49
   4  20  -1   25.90   39.90
  -4 -20   1   47.80   42.70
  -4 -20   1  -19.10   40.00
   3  20  -1   27.00   38.00
  -3 -20   1  -22.50   46.40
  -3 -20   1   -7.10   36.40
  -3 -20   1   22.20   38.90
   2  20  -1  -13.30   39.00
  -2 -20   1   66.69   46.40
  -2 -20   1  -95.29   37.30
  -2 -20   1  -74.39   32.50
   1  20  -1  128.19   44.30
  -1 -20   1   66.89   40.50
  -1 -20   1  122.49   49.60
  -1 -20   1   90.69   45.10
   0  20  -1  442.86   71.29
   0  20  -1  257.97   48.10
   0 -20   1  342.17   55.29
   0 -20   1  391.16   62.49
   0 -20   1  505.35   74.39
  -1  20  -1   -2.70   34.90
  -1  20  -1   78.99   41.80
   1 -20   1   40.90   35.10
   1 -20   1   29.00   40.00
   1 -20   1   14.70   35.80
  -2  20  -1  434.36   63.49
  -2  20  -1  255.17   54.39
  -2  20  -1  461.15   57.79
   2 -20   1  391.06   66.29
   2 -20   1  386.86   56.89
   2 -20   1  337.17   53.09
  -3  20  -1   72.19   36.10
  -3  20  -1  119.19   39.70
  -3  20  -1   87.99   35.50
   3 -20   1  107.19   43.80
   3 -20   1  116.29   40.30
   3 -20   1   69.29   38.00
  -4  20  -1   44.10   35.20
  -4  20  -1   39.00   32.70
  -4  20  -1   52.59   38.30
   4 -20   1   15.30   33.10
   4 -20   1   -3.70   32.70
   4 -20   1   87.89   43.40
  -5  20  -1   50.49   35.10
  -5  20  -1   -6.90   36.50
  -5  20  -1   33.90   38.30
   5 -20   1    3.90   34.60
   5 -20   1    8.60   33.40
   5 -20   1    8.10   40.90
  -6  20  -1   37.80   39.50
  -6  20  -1   19.50   36.40
   6 -20   1   -3.80   38.80
   6 -20   1  -18.50   33.20
   6 -20   1    0.50   33.00
  -7  20  -1  306.67   55.29
  -7  20  -1  131.79   43.50
   7 -20   1  316.97   64.59
   7 -20   1  180.08   49.10
  -8  20  -1   83.19   45.70
  -8  20  -1   41.40   45.00
   8 -20   1   32.20   45.30
   8 -20   1   66.19   44.30
  -9  20  -1   61.59   47.90
  -9  20  -1   53.89   39.00
   9 -20   1  104.99   50.29
   9 -20   1  109.69   46.60
 -10  20  -1  273.67   62.69
 -10  20  -1  675.63   88.59
  10 -20   1  422.26   71.49
 -11  20  -1    1.30   45.20
 -11  20  -1   39.40   41.90
  11 -20   1   16.70   39.70
 -12  20  -1  173.88   64.99
 -12  20  -1  145.59   55.29
  12 -20   1   51.89   47.00
  12 -20   1   61.39   46.60
 -13  20  -1  -25.80   43.30
 -13  20  -1   53.29   54.49
 -13  20  -1   67.99   54.09
  13 -20   1   -1.80   46.00
  13 -20   1   13.90   44.90
   6  19  -1  -38.40   38.90
   6  19  -1  222.78   81.29
  -6 -19   1    8.30   45.90
   5  19  -1  115.19   71.59
   5  19  -1   53.49   42.20
  -5 -19   1  106.59   50.09
  -5 -19   1  202.48   56.69
   4  19  -1  -40.60   56.59
   4  19  -1   -3.50   32.90
  -4 -19   1   37.50   43.10
  -4 -19   1   62.89   40.60
   3  19  -1  184.28   46.40
  -3 -19   1  135.09   45.50
  -3 -19   1  245.48   56.09
   2  19  -1   54.89   38.20
  -2 -19   1  127.69   46.60
  -2 -19   1   33.60   44.80
  -2 -19   1  123.99   44.40
   1  19  -1  115.79   43.30
  -1 -19   1   40.50   40.20
  -1 -19   1  113.89   37.60
  -1 -19   1  -26.80   36.20
   0  19  -1  141.69   41.10
   0  19  -1  301.27   65.99
   0 -19   1  224.88   45.30
   0 -19   1  250.57   56.09
   0 -19   1  240.28   49.70
  -1  19  -1    1.40   37.90
  -1  19  -1  -15.50   28.30
  -1  19  -1   26.20   29.10
   1 -19   1   -9.50   35.70
   1 -19   1   15.50   31.10
   1 -19   1   -7.80   32.40
  -2  19  -1   44.40   32.90
  -2  19  -1  -21.90   30.70
  -2  19  -1   30.10   30.70
   2 -19   1   59.29   33.40
   2 -19   1   17.80   34.10
   2 -19   1   15.50   39.70
  -3  19  -1   37.80   32.30
  -3  19  -1    9.60   30.80
  -3  19  -1   82.09   35.30
   3 -19   1   54.49   32.70
   3 -19   1   52.19   37.90
   3 -19   1   61.59   41.90
  -4  19  -1   84.19   39.70
  -4  19  -1  102.39   34.60
  -4  19  -1  201.28   43.80
   4 -19   1  135.89   39.00
   4 -19   1   83.49   36.40
   4 -19   1  168.48   49.99
  -5  19  -1  444.86   54.19
  -5  19  -1  337.87   56.99
  -5  19  -1  566.94   65.59
   5 -19   1  399.66   66.19
   5 -19   1  362.66   58.69
   5 -19   1  459.45   56.69
  -6  19  -1  -15.90   32.60
  -6  19  -1   37.00   32.70
   6 -19   1    0.70   28.20
   6 -19   1   -6.20   34.60
   6 -19   1   45.80   35.90
  -7  19  -1  341.17   58.39
  -7  19  -1  547.75   69.29
   7 -19   1  278.47   60.59
   7 -19   1  533.95   68.49
  -8  19  -1   24.10   39.80
  -8  19  -1  103.19   39.00
   8 -19   1   53.09   41.70
   8 -19   1  144.49   54.29
  -9  19  -1  -16.30   30.70
  -9  19  -1   64.59   46.80
   9 -19   1   72.09   41.80
   9 -19   1   56.89   44.70
 -10  19  -1    8.40   40.20
 -10  19  -1   73.99   49.30
  10 -19   1   47.30   38.10
 -11  19  -1   28.00   40.60
 -11  19  -1  -46.50   38.60
  11 -19   1   63.19   43.50
 -12  19  -1  516.65   84.09
 -12  19  -1  269.97   68.19
  12 -19   1  303.27   64.49
  12 -19   1  267.57   62.09
 -13  19  -1    1.30   44.00
 -13  19  -1    5.50   42.10
 -13  19  -1   54.69   50.49
  13 -19   1   -1.20   44.80
  13 -19   1   -1.20   45.80
 -14  19  -1   -3.80   48.70
 -14  19  -1  -18.20   49.50
 -14  19  -1   96.69   54.59
  14 -19   1   -3.60   43.20
  14 -19   1   93.19   50.19
   6  18  -1  121.09   47.10
   6  18  -1  163.48   76.09
  -6 -18   1   70.99   46.10
  -6 -18   1   82.19   47.40
   5  18  -1  360.16   85.99
   5  18  -1  346.37   63.69
  -5 -18   1  305.87   60.29
  -5 -18   1  337.97   60.89
   4  18  -1  121.49   59.19
   4  18  -1   22.90   33.80
  -4 -18   1   18.50   40.60
  -4 -18   1   54.99   39.40
   3  18  -1  -20.70   49.90
   3  18  -1   17.90   28.70
  -3 -18   1  -33.30   30.00
  -3 -18   1   10.30   35.50
   2  18  -1   -3.20   29.50
  -2 -18   1   -6.50   36.30
  -2 -18   1  -28.60   30.50
   1  18  -1  309.97   49.99
   1  18  -1  393.06   48.10
  -1 -18   1  372.06   61.49
  -1 -18   1  313.97   51.49
  -1 -18   1  404.06   59.59
   0  18  -1  677.93   56.49
   0  18  -1  478.65   59.69
   0 -18   1  524.65   64.49
   0 -18   1  505.25   59.09
   0 -18   1  662.03   75.39
  -1  18  -1    7.40   28.70
  -1  18  -1   54.19   30.60
  -1  18  -1   31.30   33.40
   1 -18   1   23.60   31.80
   1 -18   1  -11.50   33.40
   1 -18   1   67.79   32.00
  -2  18  -1  441.76   52.39
  -2  18  -1  374.56   53.69
  -2  18  -1  344.37   52.69
   2 -18   1  362.56   59.99
   2 -18   1  487.55   57.69
   2 -18   1  327.47   49.50
  -3  18  -1   -8.40   25.80
  -3  18  -1   53.09   30.60
  -3  18  -1   26.90   30.50
   3 -18   1   23.80   30.10
   3 -18   1  -23.70   34.20
   3 -18   1   41.40   30.00
  -4  18  -1  -13.50   26.90
  -4  18  -1   29.00   29.00
  -4  18  -1  -56.59   24.40
   4 -18   1   16.10   27.40
   4 -18   1   43.90   34.80
   4 -18   1   18.40   29.80
  -5  18  -1   12.00   25.00
  -5  18  -1   16.10   30.10
  -5  18  -1    2.90   30.60
   5 -18   1   19.10   26.50
   5 -18   1   31.60   32.20
   5 -18   1   52.09   37.10
  -6  18  -1   -5.60   30.10
  -6  18  -1  -12.50   29.00
   6 -18   1   53.69   36.50
   6 -18   1  -18.30   24.70
   6 -18   1   65.99   35.30
  -7  18  -1  267.17   51.89
  -7  18  -1  174.08   48.30
   7 -18   1  219.98   49.40
   7 -18   1  140.69   47.80
   7 -18   1  302.27   43.40
  -8  18  -1   40.40   38.80
  -8  18  -1   41.80   35.30
   8 -18   1  -36.00   30.80
   8 -18   1  -32.30   34.70
  -9  18  -1  126.19   41.40
  -9  18  -1  248.68   54.99
   9 -18   1  151.18   46.00
   9 -18   1  212.58   56.39
 -10  18  -1  522.55   77.09
 -10  18  -1  313.87   57.69
  10 -18   1  368.26   61.29
 -11  18  -1  -30.90   40.10
 -11  18  -1   17.40   36.40
  11 -18   1   25.40   37.40
  11 -18   1   -2.00   36.20
 -12  18  -1   60.49   54.29
 -12  18  -1  128.89   52.39
  12 -18   1   70.29   45.70
  12 -18   1   49.30   43.20
 -13  18  -1   17.40   43.30
 -13  18  -1   67.69   50.59
 -13  18  -1  -35.60   35.70
  13 -18   1  -20.00   42.10
  13 -18   1    5.00   37.80
 -14  18  -1   24.00   48.70
 -14  18  -1  108.89   60.59
 -14  18  -1   38.90   51.99
  14 -18   1   -5.40   44.00
  14 -18   1   60.99   47.00
   7  17  -1   11.20   58.89
  -7 -17   1  -62.09   45.90
   6  17  -1  137.19   69.09
  -6 -17   1   42.80   43.90
  -6 -17   1   37.50   38.70
   5  17  -1  330.77   60.09
   5  17  -1  336.97   82.89
  -5 -17   1  207.48   52.59
  -5 -17   1  190.08   48.00
   4  17  -1    6.90   29.30
   4  17  -1   -0.90   53.89
  -4 -17   1  -22.20   30.90
  -4 -17   1    8.10   34.30
   3  17  -1  165.48   46.00
   3  17  -1  136.39   41.40
   3  17  -1  154.08   58.79
  -3 -17   1  132.89   40.90
  -3 -17   1  162.28   46.60
   2  17  -1   90.79   30.10
   2  17  -1   68.79   34.80
   2  17  -1   36.90   43.60
  -2 -17   1   48.20   33.40
  -2 -17   1   14.80   33.90
   1  17  -1  120.99   36.10
   1  17  -1  122.79   30.30
  -1 -17   1  157.88   38.70
  -1 -17   1   55.49   37.50
   0  17  -1  184.88   35.60
   0  17  -1  132.69   34.90
   0 -17   1  206.58   40.10
   0 -17   1  162.88   42.20
   0 -17   1  159.08   41.10
  -1  17  -1   56.49   27.30
  -1  17  -1   38.80   27.50
   1 -17   1   37.70   29.90
   1 -17   1   31.80   30.90
   1 -17   1   63.19   38.30
  -2  17  -1  131.49   37.80
  -2  17  -1  100.69   34.80
  -2  17  -1  133.39   33.50
   2 -17   1   88.09   37.70
   2 -17   1  116.39   35.60
   2 -17   1  156.98   37.50
  -3  17  -1  118.79   34.80
  -3  17  -1   50.79   30.70
  -3  17  -1  100.09   31.90
   3 -17   1  129.09   36.30
   3 -17   1  130.69   32.70
   3 -17   1   76.79   37.40
  -4  17  -1  100.79   38.80
  -4  17  -1  221.88   43.30
  -4  17  -1  220.18   36.60
   4 -17   1  184.48   45.30
   4 -17   1  250.57   44.20
   4 -17   1  261.37   39.60
  -5  17  -1 1000.30   76.29
  -5  17  -1  822.42   60.89
  -5  17  -1  950.70   78.69
   5 -17   1  886.81   78.09
   5 -17   1  835.92   65.19
   5 -17   1  940.41   80.99
  -6  17  -1  136.19   41.40
  -6  17  -1  127.29   39.70
   6 -17   1   89.29   34.90
   6 -17   1   98.69   38.50
   6 -17   1  144.69   33.70
  -7  17  -1  488.05   69.39
  -7  17  -1  574.54   67.99
   7 -17   1  526.95   52.29
   7 -17   1  448.96   61.49
   7 -17   1  486.65   68.99
  -8  17  -1   77.69   40.10
  -8  17  -1   42.40   37.80
   8 -17   1   19.70   30.80
   8 -17   1   61.39   31.00
   8 -17   1   35.20   37.70
  -9  17  -1   29.60   37.80
  -9  17  -1   37.30   32.20
   9 -17   1  -32.10   30.30
   9 -17   1   40.00   37.70
 -10  17  -1  360.06   64.99
 -10  17  -1  275.47   54.79
  10 -17   1  293.47   57.99
 -11  17  -1   23.90   40.10
 -11  17  -1   59.79   47.40
  11 -17   1   72.79   41.10
  11 -17   1   66.19   38.80
 -12  17  -1  550.14   80.39
 -12  17  -1  640.54   88.49
  12 -17   1  410.86   69.19
  12 -17   1  405.66   66.59
 -13  17  -1   -1.20   41.30
 -13  17  -1  -33.00   38.60
 -13  17  -1  -21.00   39.10
  13 -17   1   55.79   40.10
  13 -17   1   -4.30   40.10
 -14  17  -1  184.78   60.09
 -14  17  -1  126.09   53.69
 -14  17  -1   45.20   55.39
  14 -17   1  188.28   56.99
  14 -17   1  214.98   57.39
   8  16  -1  110.69   49.70
   8  16  -1   97.59   70.29
  -8 -16   1   58.59   50.99
   7  16  -1   10.50   62.29
   7  16  -1   71.49   43.50
  -7 -16   1  -32.20   49.30
  -7 -16   1  -12.50   42.10
   6  16  -1  354.26   83.29
  -6 -16   1  153.08   52.19
  -6 -16   1  256.97   51.79
   5  16  -1  403.36   77.79
  -5 -16   1  416.26   62.09
  -5 -16   1  546.75   71.39
   4  16  -1  -18.60   46.00
   4  16  -1   28.30   30.30
  -4 -16   1   67.19   37.00
  -4 -16   1   15.80   34.00
   3  16  -1  -30.20   43.00
   3  16  -1  -13.70   28.80
   3  16  -1  -39.70   21.20
  -3 -16   1  -37.20   29.90
  -3 -16   1   -5.70   32.40
   2  16  -1   17.80   26.80
   2  16  -1    4.70   41.10
   2  16  -1   13.50   24.70
  -2 -16   1   14.30   29.20
  -2 -16   1  -16.50   23.20
   1  16  -1  317.97   44.40
   1  16  -1  352.66   41.60
  -1 -16   1  383.06   49.40
  -1 -16   1  340.67   54.59
   0  16  -1 1513.45   83.99
   0  16  -1 1695.93   97.09
   0 -16   1 1544.25   95.09
   0 -16   1 1456.05   92.29
   0 -16   1 1462.45   99.59
  -1  16  -1   38.50   26.00
  -1  16  -1   63.89   25.60
   1 -16   1   43.90   29.30
   1 -16   1   53.99   33.60
   1 -16   1  107.09   32.90
  -2  16  -1  610.34   55.29
  -2  16  -1  410.36   54.19
  -2  16  -1  622.24   59.39
   2 -16   1  435.66   52.29
   2 -16   1  518.25   54.69
   2 -16   1  664.93   69.89
  -3  16  -1  -15.10   22.70
  -3  16  -1   34.40   24.20
  -3  16  -1   12.70   25.20
   3 -16   1    8.00   25.60
   3 -16   1    4.10   29.50
   3 -16   1   48.00   25.90
  -4  16  -1   18.60   26.50
  -4  16  -1    4.90   22.00
  -4  16  -1   69.59   31.00
   4 -16   1  -19.20   27.10
   4 -16   1   18.20   27.50
   4 -16   1   21.30   23.30
  -5  16  -1   -1.80   26.80
  -5  16  -1  -12.20   20.40
  -5  16  -1   38.20   27.10
   5 -16   1   58.89   29.90
   5 -16   1   27.20   24.70
   5 -16   1    6.60   30.70
  -6  16  -1   -0.10   31.80
  -6  16  -1   80.19   34.50
   6 -16   1   35.30   30.80
   6 -16   1  113.49   30.10
   6 -16   1   46.60   30.90
  -7  16  -1  277.57   49.70
  -7  16  -1  175.58   38.80
   7 -16   1  169.18   46.50
   7 -16   1  262.27   37.30
   7 -16   1  197.58   42.40
  -8  16  -1  -31.90   23.50
  -8  16  -1   25.90   34.10
   8 -16   1  -12.20   31.60
   8 -16   1  -13.30   19.10
   8 -16   1   11.40   29.60
  -9  16  -1  401.16   58.99
  -9  16  -1  579.14   73.49
   9 -16   1  535.15   71.79
   9 -16   1  536.05   69.99
 -10  16  -1  495.95   67.39
 -10  16  -1  743.73   85.09
  10 -16   1  613.24   74.99
 -11  16  -1    5.30   37.80
 -11  16  -1   -7.40   30.10
  11 -16   1  -10.70   29.70
  11 -16   1   48.00   38.10
 -12  16  -1   53.69   41.10
 -12  16  -1   53.09   39.70
 -12  16  -1   21.80   43.80
  12 -16   1   57.49   39.70
  12 -16   1   62.09   42.70
 -13  16  -1   26.10   40.20
 -13  16  -1   20.60   42.10
 -13  16  -1   47.60   42.40
  13 -16   1   21.80   38.50
  13 -16   1   41.10   38.30
 -14  16  -1   30.40   48.20
 -14  16  -1   78.19   46.70
 -14  16  -1  102.19   48.10
  14 -16   1   82.79   50.89
  14 -16   1   81.39   43.90
 -15  16  -1  255.37   66.99
 -15  16  -1  167.88   62.19
  15 -16   1  130.99   51.99
  15 -16   1  120.59   57.69
   9  15  -1   28.00   49.10
   9  15  -1  132.39   75.79
  -9 -15   1  -10.70   48.10
   8  15  -1   -4.60   57.89
   8  15  -1   -8.90   43.10
  -8 -15   1   11.20   44.10
   7  15  -1   73.39   47.60
   7  15  -1  112.79   63.09
  -7 -15   1  -24.20   37.90
  -7 -15   1  -38.60   30.20
   6  15  -1  188.58   46.20
   6  15  -1  208.38   68.69
  -6 -15   1   76.79   38.90
  -6 -15   1  119.09   44.80
   5  15  -1  777.52   99.79
  -5 -15   1  556.84   66.69
  -5 -15   1  673.53   70.49
   4  15  -1   69.09   50.99
  -4 -15   1   18.10   33.90
  -4 -15   1   67.79   35.70
   3  15  -1  362.46   67.69
   3  15  -1  284.67   49.10
  -3 -15   1  317.97   46.30
  -3 -15   1  297.87   50.49
   2  15  -1  -15.50   20.20
   2  15  -1   63.89   44.70
   2  15  -1   41.60   28.40
  -2 -15   1   50.79   33.40
  -2 -15   1   45.00   29.40
   1  15  -1   48.10   25.70
   1  15  -1   31.40   22.70
   1  15  -1  112.49   41.70
  -1 -15   1   99.09   31.20
  -1 -15   1   89.89   34.00
   0  15  -1   86.39   29.00
   0  15  -1  138.19   29.80
   0 -15   1  105.29   35.50
   0 -15   1   85.99   30.10
  -1  15  -1  -17.60   20.40
  -1  15  -1  -13.20   21.50
  -1  15  -1   34.00   13.10
   1 -15   1    6.10   28.50
   1 -15   1   26.30   25.00
   1 -15   1   -4.70   24.00
  -2  15  -1  174.68   34.80
  -2  15  -1  165.98   22.10
  -2  15  -1  246.58   38.40
  -2  15  -1  240.78   35.60
   2 -15   1  204.18   35.50
   2 -15   1  177.98   42.00
   2 -15   1  209.58   36.80
  -3  15  -1   46.20   26.50
  -3  15  -1   38.40   24.90
  -3  15  -1   25.40   21.50
   3 -15   1   24.60   18.50
   3 -15   1   24.40   26.40
   3 -15   1   10.30   23.70
   3 -15   1    5.30   21.70
  -4  15  -1 1177.78   68.09
  -4  15  -1 1123.79   79.19
  -4  15  -1 1279.77   78.59
   4 -15   1 1151.28   83.49
   4 -15   1 1108.59   77.89
   4 -15   1 1169.68   70.69
  -5  15  -1 1572.24   95.39
  -5  15  -1 1516.75   78.29
  -5  15  -1 1501.15   92.69
   5 -15   1 1449.46   94.89
   5 -15   1 1638.74   84.39
   5 -15   1 1548.95   98.89
  -6  15  -1  235.58   41.80
  -6  15  -1  241.48   45.80
   6 -15   1  158.38   41.90
   6 -15   1  181.28   39.60
   6 -15   1  187.48   31.40
  -7  15  -1  398.56   55.29
  -7  15  -1  323.17   49.50
   7 -15   1  338.87   39.20
   7 -15   1  346.27   56.99
   7 -15   1  408.16   56.99
  -8  15  -1   55.29   33.30
  -8  15  -1   -1.90   34.10
   8 -15   1   39.60   33.70
   8 -15   1   -8.20   26.00
  -9  15  -1   81.79   40.10
  -9  15  -1   70.79   36.60
   9 -15   1   50.19   22.20
   9 -15   1   80.89   36.70
 -10  15  -1  213.18   47.90
 -10  15  -1  178.28   47.50
  10 -15   1  145.69   41.60
 -11  15  -1   60.49   40.70
 -11  15  -1   41.40   35.30
  11 -15   1   -5.90   29.90
  11 -15   1  141.49   42.60
 -12  15  -1  759.22   84.89
 -12  15  -1  480.15   70.39
 -12  15  -1  871.91   96.59
  12 -15   1  603.64   77.39
  12 -15   1  680.43   84.19
 -13  15  -1   41.80   40.60
 -13  15  -1    2.10   39.50
 -13  15  -1  -38.00   29.30
  13 -15   1   12.70   34.70
  13 -15   1   -3.00   34.20
 -14  15  -1  228.78   56.39
 -14  15  -1  320.67   68.09
 -14  15  -1  259.57   60.09
  14 -15   1  351.36   67.49
  14 -15   1  307.67   60.89
 -15  15  -1   98.89   50.89
 -15  15  -1   99.89   54.29
  15 -15   1  130.89   57.29
  10  14  -1   39.70   46.90
   9  14  -1   61.69   47.20
   9  14  -1   69.39   62.79
  -9 -14   1   42.00   44.90
   8  14  -1  194.28   71.39
   8  14  -1  259.17   54.39
  -8 -14   1  232.18   56.59
   7  14  -1   68.99   42.80
   7  14  -1   38.00   54.09
  -7 -14   1    9.90   39.00
  -7 -14   1   79.39   35.10
   6  14  -1  258.87   48.50
   6  14  -1  289.57   76.69
  -6 -14   1  392.36   53.89
  -6 -14   1  327.27   53.59
   5  14  -1  232.38   44.90
   5  14  -1  165.38   60.39
  -5 -14   1  145.99   40.50
  -5 -14   1  256.37   47.50
   4  14  -1   -2.00   39.20
  -4 -14   1   15.00   29.80
  -4 -14   1   33.40   33.60
  -4 -14   1    3.40   18.30
   3  14  -1   98.09   50.39
   3  14  -1  -11.50   28.10
  -3 -14   1  125.69   37.40
  -3 -14   1   50.69   28.30
  -3 -14   1   60.79   18.60
   2  14  -1   88.09   26.50
   2  14  -1   31.30   20.80
   2  14  -1   94.59   43.50
  -2 -14   1   64.09   32.50
  -2 -14   1   75.99   29.30
   1  14  -1  780.22   52.89
   1  14  -1  745.93   42.80
   1  14  -1  728.73   78.59
   1  14  -1  751.52   59.49
  -1 -14   1  919.31   62.99
  -1 -14   1  816.92   67.09
   0  14  -1 1010.50   58.79
   0  14  -1  823.12   47.20
   0  14  -1 1077.29   68.69
   0 -14   1  977.80   72.99
   0 -14   1 1068.19   68.39
  -1  14  -1   50.99   13.60
  -1  14  -1   38.30   21.60
  -1  14  -1   44.70   21.40
   1 -14   1   35.90   27.10
   1 -14   1   90.89   27.70
   1 -14   1   46.40   25.30
  -2  14  -1  885.61   57.19
  -2  14  -1  708.53   58.59
  -2  14  -1  909.01   59.69
  -2  14  -1  699.43   42.40
   2 -14   1  832.92   66.69
   2 -14   1  693.33   58.79
   2 -14   1  832.12   56.69
  -3  14  -1  139.99   29.90
  -3  14  -1  130.19   27.40
  -3  14  -1  109.09   27.60
   3 -14   1  122.39   33.60
   3 -14   1  133.89   27.40
   3 -14   1  111.49   29.70
   3 -14   1  117.09   22.00
  -4  14  -1   62.09   25.00
  -4  14  -1   17.30   23.80
  -4  14  -1  111.39   23.60
   4 -14   1   46.70   24.80
   4 -14   1   60.79   22.40
   4 -14   1   78.89   30.00
  -5  14  -1   13.90   24.60
  -5  14  -1    2.80   23.10
  -5  14  -1   28.50   17.60
   5 -14   1   -0.40   25.40
   5 -14   1   -5.70   22.00
   5 -14   1    1.50   16.90
  -6  14  -1  108.09   33.00
  -6  14  -1  110.49   34.40
   6 -14   1   56.29   27.40
   6 -14   1  107.59   23.80
   6 -14   1  102.49   32.80
  -7  14  -1  826.42   73.59
  -7  14  -1  857.21   69.29
   7 -14   1  830.42   76.39
   7 -14   1  802.82   79.39
   7 -14   1  818.52   53.49
  -8  14  -1   41.00   27.50
  -8  14  -1   18.30   29.90
   8 -14   1  -27.60   13.50
   8 -14   1   43.30   35.20
   8 -14   1   19.90   26.40
  -9  14  -1 2017.20  120.89
  -9  14  -1 1900.21  114.99
   9 -14   1 1740.63   90.69
   9 -14   1 1916.21  114.79
 -10  14  -1  496.35   64.49
 -10  14  -1  558.04   72.49
  10 -14   1  588.14   71.89
  10 -14   1  610.04   48.20
 -11  14  -1   56.59   34.80
 -11  14  -1   39.90   38.20
  11 -14   1  151.18   43.50
  11 -14   1   76.59   27.90
  11 -14   1   66.89   38.50
 -12  14  -1    2.50   32.10
 -12  14  -1   -3.70   39.60
 -12  14  -1   39.50   31.70
  12 -14   1  -35.50   30.80
  12 -14   1   10.20   31.60
 -13  14  -1    4.60   33.00
 -13  14  -1   25.40   37.80
 -13  14  -1   81.79   44.30
  13 -14   1   37.70   37.70
  13 -14   1   19.10   39.20
 -14  14  -1  170.58   55.99
 -14  14  -1  164.78   48.40
 -14  14  -1  161.48   54.79
  14 -14   1  209.18   49.99
  14 -14   1  180.48   55.79
 -15  14  -1  215.48   60.49
 -15  14  -1  197.78   63.29
  15 -14   1  147.89   53.39
  10  13  -1  245.68   57.69
  10  13  -1  216.48   76.29
 -10 -13   1  162.78   57.59
   9  13  -1    5.90   40.80
   9  13  -1   89.09   56.79
  -9 -13   1  124.19   48.10
   8  13  -1  -41.50   42.80
   8  13  -1   -6.40   34.30
  -8 -13   1   -9.40   29.80
  -8 -13   1  -42.30   36.40
   7  13  -1   28.70   35.20
   7  13  -1  113.49   51.69
  -7 -13   1   53.29   33.10
  -7 -13   1   12.60   35.00
   6  13  -1  396.86   53.69
   6  13  -1  284.97   67.39
  -6 -13   1  290.87   41.30
  -6 -13   1  301.57   50.89
  -6 -13   1  351.96   50.29
   5  13  -1  341.77   51.59
   5  13  -1  401.66   70.09
  -5 -13   1  501.95   55.29
  -5 -13   1  409.76   52.09
  -5 -13   1  381.46   35.10
   4  13  -1  111.49   49.70
   4  13  -1   56.09   29.80
  -4 -13   1   92.89   33.30
  -4 -13   1  140.89   36.70
  -4 -13   1  103.39   21.90
   3  13  -1  799.42   85.39
  -3 -13   1  773.42   44.90
  -3 -13   1  839.92   66.29
  -3 -13   1  853.61   67.19
   2  13  -1  163.78   44.60
   2  13  -1   98.09   28.80
  -2 -13   1  159.68   35.20
  -2 -13   1  119.49   31.00
   1  13  -1  707.53   52.89
   1  13  -1  589.54   42.90
   1  13  -1  517.95   34.00
   1  13  -1  609.54   70.69
  -1 -13   1  612.34   51.29
  -1 -13   1  527.75   55.39
   0  13  -1   21.10   23.40
   0  13  -1    9.70   10.90
   0  13  -1   30.00   18.90
   0 -13   1   29.80   24.40
   0 -13   1   46.40   23.20
  -1  13  -1   -2.00    9.90
  -1  13  -1    2.70   17.10
  -1  13  -1   21.00   18.30
   1 -13   1   -0.30   20.00
   1 -13   1    8.50   21.40
   1 -13   1   21.20   20.00
  -2  13  -1  590.04   51.59
  -2  13  -1  675.73   39.40
  -2  13  -1  731.53   52.99
  -2  13  -1  743.33   50.09
   2 -13   1  850.71   52.99
   2 -13   1  798.72   60.49
   2 -13   1  564.04   51.29
  -3  13  -1  105.59   25.90
  -3  13  -1  115.29   23.40
  -3  13  -1  161.38   24.00
  -3  13  -1  142.59   29.30
   3 -13   1  133.59   26.10
   3 -13   1  100.69   27.30
   3 -13   1  125.59   31.20
  -4  13  -1 1417.36   84.99
  -4  13  -1 1658.13   77.49
  -4  13  -1 1486.05   87.09
   4 -13   1 1611.64   87.69
   4 -13   1 1505.75   78.59
   4 -13   1 1594.54   92.39
  -5  13  -1  887.91   63.89
  -5  13  -1  853.51   62.99
  -5  13  -1  819.62   49.10
   5 -13   1  881.81   53.19
   5 -13   1  933.01   65.99
   5 -13   1  676.13   67.59
  -6  13  -1  222.88   40.20
  -6  13  -1  262.77   40.10
   6 -13   1  249.97   40.00
   6 -13   1  277.37   45.20
   6 -13   1  282.57   32.80
  -7  13  -1  186.58   39.00
  -7  13  -1  206.38   41.70
   7 -13   1  192.08   28.60
   7 -13   1  230.68   43.60
   7 -13   1  228.78   39.40
  -8  13  -1  526.95   34.60
  -8  13  -1  450.95   58.89
  -8  13  -1  420.26   57.89
   8 -13   1  500.65   39.60
   8 -13   1  360.46   51.19
   8 -13   1  523.45   64.09
  -9  13  -1  227.48   49.30
  -9  13  -1  223.68   44.40
   9 -13   1  212.58   46.10
   9 -13   1  241.08   32.80
 -10  13  -1  294.47   49.20
 -10  13  -1  158.58   43.90
  10 -13   1  119.29   40.40
  10 -13   1  167.08   31.20
  10 -13   1  216.58   47.10
 -11  13  -1  190.68   47.40
 -11  13  -1  166.78   43.80
 -11  13  -1  160.28   47.60
  11 -13   1  107.99   28.00
  11 -13   1   88.49   39.80
  11 -13   1  135.29   41.90
 -12  13  -1  524.45   67.59
 -12  13  -1  436.16   66.69
 -12  13  -1  453.15   71.09
  12 -13   1  316.57   61.89
  12 -13   1  430.76   60.69
 -13  13  -1    5.20   29.60
 -13  13  -1  -23.80   34.10
 -13  13  -1   15.60   37.90
  13 -13   1   11.20   34.80
  13 -13   1   17.40   31.70
 -14  13  -1  339.07   57.99
 -14  13  -1  305.77   71.19
 -14  13  -1  305.07   65.69
  14 -13   1  252.37   62.89
  14 -13   1  224.48   53.19
 -15  13  -1   89.29   48.40
 -15  13  -1  102.59   50.69
  15 -13   1  104.59   50.89
 -16  13  -1  -19.80   44.80
 -16  13  -1  -12.80   45.30
  16 -13   1   44.70   45.10
  11  12  -1    2.70   46.80
  11  12  -1  -43.80   52.09
 -11 -12   1   43.70   50.99
  10  12  -1   51.29   40.00
  10  12  -1  201.98   68.69
 -10 -12   1   83.49   50.59
   9  12  -1  155.18   59.49
   9  12  -1   12.50   37.40
  -9 -12   1   30.80   42.70
   8  12  -1  524.45   65.59
   8  12  -1  573.64   93.39
  -8 -12   1  572.94   69.69
  -8 -12   1  566.74   60.89
   7  12  -1   72.49   31.60
   7  12  -1  211.68   44.50
   7  12  -1   90.59   50.89
  -7 -12   1  109.69   37.80
  -7 -12   1   42.90   30.40
  -7 -12   1  126.99   25.90
   6  12  -1  333.77   43.70
   6  12  -1  408.96   53.79
   6  12  -1  332.07   65.89
  -6 -12   1  464.15   54.79
  -6 -12   1  340.37   47.70
  -6 -12   1  365.76   36.00
   5  12  -1   18.20   36.70
   5  12  -1   -1.70   21.50
   5  12  -1   35.30   28.30
  -5 -12   1   40.40   18.30
  -5 -12   1   31.30   28.50
  -5 -12   1   22.70   25.60
   4  12  -1  -19.00   21.40
   4  12  -1   -6.20   36.00
  -4 -12   1   -0.60   25.20
  -4 -12   1   17.60   23.80
  -4 -12   1   49.50   16.20
   3  12  -1   78.59   41.90
   3  12  -1   86.69   28.70
  -3 -12   1   95.19   28.30
  -3 -12   1  157.58   33.70
  -3 -12   1   99.79   18.70
   2  12  -1   -2.80   29.50
   2  12  -1   15.60   20.40
  -2 -12   1   49.50   24.50
  -2 -12   1   14.20   13.40
  -2 -12   1  -15.90   20.70
   1  12  -1 1892.61   85.99
   1  12  -1 2134.79  101.89
   1  12  -1 2073.19  115.69
   1  12  -1 2029.20   92.09
  -1 -12   1 2115.49  100.59
  -1 -12   1 2087.29  105.79
   0  12  -1  437.16   28.50
   0  12  -1  542.75   44.80
   0  12  -1  512.85   37.90
   0  12  -1  401.36   52.79
   0 -12   1  542.75   44.80
   0 -12   1  504.95   50.99
  -1  12  -1  630.34   35.20
  -1  12  -1  646.54   49.90
  -1  12  -1  659.13   44.40
   1 -12   1  690.03   50.09
   1 -12   1  756.72   56.99
  -2  12  -1  526.45   41.40
  -2  12  -1  381.06   29.10
  -2  12  -1  354.76   39.20
  -2  12  -1  535.65   40.20
   2 -12   1  481.45   39.90
   2 -12   1  512.15   34.00
   2 -12   1  484.05   48.10
   2 -12   1  416.56   46.50
  -3  12  -1  488.55   37.30
  -3  12  -1  331.87   37.40
  -3  12  -1  407.06   43.30
   3 -12   1  425.36   36.70
   3 -12   1  364.96   44.70
   3 -12   1  468.05   46.80
  -4  12  -1   -9.40   14.20
  -4  12  -1    3.90   17.90
  -4  12  -1    1.10   17.70
   4 -12   1  -28.90   18.40
   4 -12   1   -6.60   15.80
   4 -12   1   19.20   16.20
  -5  12  -1   39.10   20.40
  -5  12  -1   41.20   23.10
   5 -12   1   32.30   23.90
   5 -12   1   68.79   22.50
   5 -12   1   27.60   22.90
   5 -12   1   54.09   18.40
  -6  12  -1   -2.10   19.70
  -6  12  -1    2.00   20.00
   6 -12   1   37.00   24.50
   6 -12   1   25.10   16.70
   6 -12   1   -1.40   19.30
  -7  12  -1 1058.09   74.99
  -7  12  -1 1067.69   71.99
  -7  12  -1  850.81   49.50
   7 -12   1 1136.99   75.59
   7 -12   1 1001.80   70.39
  -8  12  -1   13.80   13.10
  -8  12  -1   62.39   29.20
  -8  12  -1   50.89   29.50
   8 -12   1   41.90   27.80
   8 -12   1   50.79   19.10
   8 -12   1   19.50   25.20
  -9  12  -1 1123.19   82.19
  -9  12  -1 1153.48   87.29
   9 -12   1 1029.10   80.89
   9 -12   1 1153.58   65.29
 -10  12  -1  460.05   65.39
 -10  12  -1  347.07   53.79
  10 -12   1  313.87   53.09
  10 -12   1  328.07   52.29
  10 -12   1  456.05   45.70
 -11  12  -1  293.47   50.49
 -11  12  -1  319.67   58.19
 -11  12  -1  359.66   59.39
  11 -12   1  274.77   38.50
  11 -12   1  302.37   52.99
  11 -12   1  288.17   51.99
 -12  12  -1    1.70   30.70
 -12  12  -1   30.40   31.60
 -12  12  -1   36.50   30.50
  12 -12   1   16.00   28.50
  12 -12   1    8.40   32.70
  12 -12   1   -1.40   20.70
 -13  12  -1  -36.40   31.40
 -13  12  -1  -33.30   28.00
 -13  12  -1   -5.20   34.30
  13 -12   1   63.69   33.90
  13 -12   1  -31.60   30.80
 -14  12  -1  286.07   64.99
 -14  12  -1  284.87   63.29
  14 -12   1  388.06   69.49
  14 -12   1  335.07   58.99
 -15  12  -1   80.69   48.60
 -15  12  -1   53.69   45.80
  15 -12   1   87.89   46.50
 -16  12  -1  175.58   60.49
 -16  12  -1  282.77   64.29
  16 -12   1  201.18   64.19
  11  11  -1  269.97   77.29
  11  11  -1  402.46   64.89
 -11 -11   1  465.35   73.59
  10  11  -1   96.19   46.80
  10  11  -1   48.20   60.59
 -10 -11   1  117.59   49.70
   9  11  -1   30.70   42.70
   9  11  -1  -40.40   32.60
   9  11  -1   -6.30   49.10
  -9 -11   1   -1.40   33.90
  -9 -11   1   14.80   37.00
   8  11  -1    1.90   30.80
   8  11  -1    5.20   31.50
   8  11  -1  -27.40   38.80
  -8 -11   1   18.40   37.10
  -8 -11   1   17.10   23.00
  -8 -11   1   25.70   25.00
   7  11  -1   72.99   33.50
   7  11  -1  112.59   51.09
   7  11  -1  110.69   34.50
  -7 -11   1   82.29   38.40
  -7 -11   1   73.69   28.70
  -7 -11   1   75.19   24.90
   6  11  -1  673.63   90.69
   6  11  -1  560.54   56.79
   6  11  -1  663.73   53.79
  -6 -11   1  717.63   57.39
  -6 -11   1  580.24   58.29
  -6 -11   1  607.74   44.10
   5  11  -1  427.06   66.19
   5  11  -1  461.05   49.80
   5  11  -1  443.86   42.30
  -5 -11   1  399.16   47.30
  -5 -11   1  440.96   34.90
  -5 -11   1  522.75   52.69
   4  11  -1  188.48   27.80
   4  11  -1  231.88   53.59
   4  11  -1  145.69   32.30
  -4 -11   1  163.58   33.10
  -4 -11   1  156.98   20.90
  -4 -11   1  192.28   37.60
   3  11  -1 1438.96   96.19
  -3 -11   1 1342.37   63.59
  -3 -11   1 1429.36   78.99
  -3 -11   1 1411.36   80.49
   2  11  -1  333.57   51.29
  -2 -11   1  337.87   25.70
  -2 -11   1  353.76   38.70
  -2 -11   1  290.07   38.10
   1  11  -1  159.08   38.40
   1  11  -1  174.58   18.30
   1  11  -1  175.58   22.90
   1  11  -1  125.39   24.60
  -1 -11   1  168.28   31.20
  -1 -11   1  150.08   26.00
   0  11  -1   84.49   17.40
   0  11  -1   83.79   13.00
   0  11  -1   40.50   21.70
   0  11  -1   57.89   19.60
   0 -11   1   98.09   23.20
   0 -11   1   60.29   22.60
  -1  11  -1   90.79   13.80
  -1  11  -1   98.29   19.40
  -1  11  -1  100.19   23.70
   1 -11   1   68.09   20.70
   1 -11   1  115.89   25.90
  -2  11  -1 1652.73   78.49
  -2  11  -1 1540.05   76.19
  -2  11  -1 1389.56   67.29
  -2  11  -1 1491.25   79.29
   2 -11   1 1629.34   80.99
   2 -11   1 1572.24   84.89
   2 -11   1 1534.95   76.19
   2 -11   1 1567.84   70.99
  -3  11  -1  -14.50   12.20
  -3  11  -1  -23.40   13.80
  -3  11  -1   12.80   17.50
   3 -11   1  -11.60   14.60
   3 -11   1   -2.70   19.40
   3 -11   1    5.10   18.30
   3 -11   1    8.90   14.30
  -4  11  -1 2614.34  112.59
  -4  11  -1 2595.74  123.19
  -4  11  -1 2787.32  124.69
   4 -11   1 2749.92  120.19
   4 -11   1 2622.64  114.39
   4 -11   1 2511.25  126.29
   4 -11   1 2709.03  123.79
  -5  11  -1  411.06   45.20
  -5  11  -1  288.37   40.00
   5 -11   1  429.46   32.60
   5 -11   1  386.86   42.20
   5 -11   1  431.76   47.70
  -6  11  -1  990.80   67.79
  -6  11  -1  901.31   64.39
  -6  11  -1 1017.20   49.40
   6 -11   1  852.51   65.99
   6 -11   1 1041.40   53.69
   6 -11   1  907.31   65.69
  -7  11  -1  449.86   31.30
  -7  11  -1  491.45   55.39
  -7  11  -1  449.95   52.09
   7 -11   1  458.45   36.40
   7 -11   1  529.95   58.39
   7 -11   1  503.25   52.39
  -8  11  -1  502.65   33.70
  -8  11  -1  519.15   57.79
  -8  11  -1  578.34   64.29
   8 -11   1  446.96   38.30
   8 -11   1  451.75   53.49
  -9  11  -1  218.18   41.40
  -9  11  -1  284.67   48.60
  -9  11  -1  279.97   28.40
   9 -11   1  314.77   36.70
   9 -11   1  323.37   51.59
 -10  11  -1   92.89   38.00
 -10  11  -1  142.19   42.50
 -10  11  -1  111.59   36.80
  10 -11   1  137.19   28.70
  10 -11   1   93.49   36.80
  10 -11   1  119.89   35.50
 -11  11  -1  379.26   62.09
 -11  11  -1  297.17   51.89
 -11  11  -1  393.76   55.39
  11 -11   1  314.67   51.69
  11 -11   1  379.66   44.10
  11 -11   1  296.17   54.89
 -12  11  -1  469.65   67.19
 -12  11  -1  668.33   84.09
 -12  11  -1  587.34   66.79
  12 -11   1  597.84   59.09
  12 -11   1  682.53   83.69
  12 -11   1  615.64   69.39
 -13  11  -1   27.60   36.30
 -13  11  -1   20.60   37.40
 -13  11  -1    8.10   27.90
  13 -11   1  -45.10   27.10
  13 -11   1    0.60   32.70
  13 -11   1    7.80   35.90
 -14  11  -1  250.87   59.69
 -14  11  -1  359.66   67.69
  14 -11   1  315.27   65.49
  14 -11   1  331.77   65.59
 -15  11  -1   67.29   45.30
 -15  11  -1   77.89   52.69
  15 -11   1  102.09   47.80
 -16  11  -1   37.20   48.90
 -16  11  -1   85.29   50.89
  16 -11   1   67.39   50.19
  12  10  -1  146.79   52.49
  12  10  -1   84.49   68.29
 -12 -10   1  -20.50   50.99
  11  10  -1   56.89   42.30
  11  10  -1   31.10   52.89
 -11 -10   1    3.10   44.70
  10  10  -1   54.39   38.20
  10  10  -1   71.89   51.99
  10  10  -1   84.39   40.80
 -10 -10   1   66.99   42.80
 -10 -10   1  111.99   41.60
   9  10  -1  305.37   52.19
   9  10  -1  173.48   43.50
   9  10  -1  228.28   63.89
  -9 -10   1  129.79   34.80
  -9 -10   1  135.29   32.70
  -9 -10   1  307.77   57.79
   8  10  -1  557.74   64.79
   8  10  -1  523.85   83.29
   8  10  -1  534.35   59.69
  -8 -10   1  617.24   56.89
  -8 -10   1  583.84   64.49
  -8 -10   1  415.76   44.90
   7  10  -1   21.20   26.60
   7  10  -1   26.90   37.80
   7  10  -1   34.10   28.20
  -7 -10   1   -1.70   26.60
  -7 -10   1   19.80   23.60
  -7 -10   1   34.80   20.10
   6  10  -1  853.41   62.19
   6  10  -1 1028.20   91.49
   6  10  -1  914.71   66.39
  -6 -10   1  925.21   64.09
  -6 -10   1  920.41   54.69
  -6 -10   1  955.20   68.99
   5  10  -1   53.29   23.50
   5  10  -1   28.70   22.00
   5  10  -1   52.99   36.00
  -5 -10   1   56.69   17.90
  -5 -10   1   56.49   23.60
  -5 -10   1   39.60   25.30
   4  10  -1   82.59   24.10
   4  10  -1   99.09   23.90
   4  10  -1  102.59   37.90
  -4 -10   1   62.49   15.30
  -4 -10   1   70.89   23.20
  -4 -10   1  104.49   24.80
   3  10  -1   84.29   23.70
   3  10  -1   15.80   30.60
  -3 -10   1   40.00   20.80
  -3 -10   1   64.39   14.70
  -3 -10   1   33.40   20.00
   2  10  -1    5.30   17.60
   2  10  -1  -44.50   23.20
  -2 -10   1    3.10   10.60
  -2 -10   1    3.00   17.90
  -2 -10   1    5.20   17.70
   1  10  -1 2087.79   91.69
   1  10  -1 2403.36  117.19
   1  10  -1 2271.17  104.49
  -1 -10   1 2198.68  106.79
  -1 -10   1 2340.67  104.69
   0  10  -1  172.88   21.70
   0  10  -1  211.48   17.50
   0  10  -1  218.88   35.00
   0  10  -1  156.68   24.90
   0 -10   1  164.88   27.50
   0 -10   1  152.48   23.90
  -1  10  -1  830.62   52.59
  -1  10  -1  848.32   47.70
  -1  10  -1  888.71   41.80
   1 -10   1  888.31   44.70
   1 -10   1  821.02   55.99
   1 -10   1  820.32   51.99
  -2  10  -1 1128.19   62.79
  -2  10  -1 1226.68   66.99
  -2  10  -1 1306.27   64.69
   2 -10   1 1242.98   68.89
   2 -10   1 1169.38   57.89
   2 -10   1 1338.37   72.29
   2 -10   1 1186.08   62.59
   2 -10   1 1350.26   67.99
  -3  10  -1  230.58   30.60
  -3  10  -1  335.17   28.70
  -3  10  -1  263.67   31.10
   3 -10   1  264.47   31.40
   3 -10   1  352.56   28.30
   3 -10   1  231.08   33.20
   3 -10   1  339.27   30.90
   3 -10   1  325.67   35.70
  -4  10  -1   -2.00   15.10
  -4  10  -1    8.00   15.50
  -4  10  -1    9.20   11.30
   4 -10   1   -0.90   12.10
   4 -10   1   -4.40   15.70
   4 -10   1   19.50   19.00
  -5  10  -1  158.78   29.00
  -5  10  -1  185.98   31.30
   5 -10   1  160.58   27.10
   5 -10   1  166.68   30.90
   5 -10   1  178.68   22.40
  -6  10  -1  311.27   40.80
  -6  10  -1  322.07   24.60
  -6  10  -1  316.67   40.60
   6 -10   1  248.78   33.90
   6 -10   1  365.96   45.70
   6 -10   1  332.67   30.30
  -7  10  -1 1218.98   76.09
  -7  10  -1 1116.09   55.39
  -7  10  -1 1202.28   77.29
   7 -10   1 1123.69   73.69
   7 -10   1 1163.68   73.79
   7 -10   1 1163.98   60.69
  -8  10  -1   40.90   25.60
  -8  10  -1   65.29   16.00
  -8  10  -1   35.70   25.80
   8 -10   1   51.89   19.20
   8 -10   1   45.50   24.50
  -9  10  -1 1404.66   70.49
  -9  10  -1 1564.14   98.29
  -9  10  -1 1475.15   94.19
   9 -10   1 1545.35   94.79
   9 -10   1 1396.16   76.19
   9 -10   1 1384.76   89.19
 -10  10  -1   76.49   33.80
 -10  10  -1   81.69   29.90
 -10  10  -1   73.89   34.20
  10 -10   1  108.39   25.30
  10 -10   1   75.79   30.80
  10 -10   1   79.79   34.10
 -11  10  -1  196.28   44.10
 -11  10  -1  254.87   52.29
 -11  10  -1  257.37   44.70
  11 -10   1  230.88   38.60
  11 -10   1  245.78   50.19
  11 -10   1  257.67   47.60
 -12  10  -1    1.60   30.80
 -12  10  -1   -8.80   23.30
 -12  10  -1  -25.40   27.30
  12 -10   1   -8.60   21.70
  12 -10   1   37.10   36.40
  12 -10   1   28.20   26.50
 -13  10  -1  129.79   38.40
 -13  10  -1  161.08   50.79
 -13  10  -1  164.08   48.40
  13 -10   1  118.69   39.60
  13 -10   1  165.18   37.50
  13 -10   1  214.68   51.39
 -14  10  -1  389.76   70.49
 -14  10  -1  452.95   74.79
  14 -10   1  402.66   70.59
 -15  10  -1  147.89   52.39
 -15  10  -1  181.88   55.29
  15 -10   1  169.18   57.69
 -16  10  -1  264.57   63.99
 -16  10  -1  302.07   69.09
  16 -10   1  425.16   85.39
  12   9  -1   13.40   41.60
  12   9  -1   -5.00   53.99
 -12  -9   1   44.60   46.50
  11   9  -1  575.94   97.89
  11   9  -1  455.65   67.39
  11   9  -1  562.64   73.99
 -11  -9   1  479.55   67.89
 -11  -9   1  463.95   59.19
  10   9  -1  174.68   48.60
  10   9  -1  215.98   68.29
  10   9  -1  185.78   47.70
 -10  -9   1  230.28   54.09
 -10  -9   1  126.49   36.10
   9   9  -1   67.99   46.60
   9   9  -1   15.00   35.20
   9   9  -1  -68.59   28.30
  -9  -9   1   15.60   33.90
  -9  -9   1   27.40   25.20
  -9  -9   1  -18.10   21.30
   8   9  -1   63.69   33.80
   8   9  -1   73.69   33.00
   8   9  -1   68.39   47.90
  -8  -9   1   43.50   24.00
  -8  -9   1  -28.70   27.30
  -8  -9   1    7.00   21.20
   7   9  -1  372.96   48.10
   7   9  -1  376.96   48.80
   7   9  -1  284.67   60.99
  -7  -9   1  377.76   49.90
  -7  -9   1  378.96   38.20
  -7  -9   1  244.58   36.40
   6   9  -1 1125.49   70.29
   6   9  -1 1212.58   74.49
   6   9  -1 1111.79   92.59
  -6  -9   1 1067.09   60.89
  -6  -9   1 1128.69   72.79
  -6  -9   1 1061.09   66.69
   5   9  -1  382.66   42.70
   5   9  -1  354.96   39.80
   5   9  -1  275.67   52.19
  -5  -9   1  357.96   41.80
  -5  -9   1  358.56   31.80
  -5  -9   1  319.87   36.60
   4   9  -1 1394.56   91.09
   4   9  -1 1411.76   73.19
   4   9  -1 1277.47   67.19
  -4  -9   1 1265.17   60.79
  -4  -9   1 1230.38   70.69
  -4  -9   1 1256.87   71.29
   3   9  -1 1659.43   98.39
   3   9  -1 1694.63   75.99
   3   9  -1 1629.14   82.19
  -3  -9   1 1471.75   80.79
  -3  -9   1 1646.74   81.89
  -3  -9   1 1666.93   70.79
   2   9  -1  182.48   38.90
   2   9  -1  132.29   24.30
   2   9  -1  157.38   20.50
  -2  -9   1  139.29   25.90
  -2  -9   1  165.98   16.70
  -2  -9   1  167.18   26.60
   1   9  -1  121.49   14.70
   1   9  -1  131.09   30.80
  -1  -9   1  130.99   15.30
  -1  -9   1  153.28   24.50
  -1  -9   1  107.79   23.70
   0   9  -1  579.64   49.80
   0   9  -1  509.15   28.40
   0   9  -1  579.64   40.70
   0   9  -1  557.94   34.50
   0  -9   1  602.64   43.80
   0  -9   1  571.84   39.40
  -1   9  -1    6.60   12.70
  -1   9  -1   14.20    9.70
  -1   9  -1  -10.60   11.90
   1  -9   1   17.20   14.50
   1  -9   1   15.20   19.30
   1  -9   1   13.70   12.30
   1  -9   1   20.30   16.60
  -2   9  -1  734.93   47.20
  -2   9  -1  746.83   44.70
  -2   9  -1  763.72   45.10
   2  -9   1  806.72   49.90
   2  -9   1  776.62   43.40
   2  -9   1  674.03   39.30
   2  -9   1  784.82   47.50
   2  -9   1  795.72   52.29
  -3   9  -1   57.09   19.20
  -3   9  -1   40.20   16.90
  -3   9  -1   54.49   14.40
   3  -9   1   35.40   19.80
   3  -9   1   43.20   18.20
   3  -9   1   50.69   15.10
   3  -9   1   81.89   20.70
   3  -9   1   36.50   13.90
  -4   9  -1 1931.11   93.99
  -4   9  -1 1933.91   95.79
   4  -9   1 1963.30   97.99
   4  -9   1 2024.00   85.89
   4  -9   1 2012.00   94.69
  -5   9  -1  233.58   33.80
  -5   9  -1  331.87   23.30
  -5   9  -1  341.37   38.40
   5  -9   1  306.67   37.00
   5  -9   1  335.67   37.80
   5  -9   1  345.07   26.80
  -6   9  -1 1123.29   69.29
  -6   9  -1 1117.29   53.39
  -6   9  -1 1095.09   70.99
   6  -9   1 1282.17   71.89
   6  -9   1 1088.99   69.69
   6  -9   1 1145.19   58.09
  -7   9  -1  346.57   43.10
  -7   9  -1  378.06   27.90
  -7   9  -1  342.97   45.70
   7  -9   1  470.85   52.59
   7  -9   1  379.26   35.60
  -8   9  -1  432.46   49.30
  -8   9  -1  413.26   31.10
  -8   9  -1  291.77   45.20
   8  -9   1  367.06   46.90
   8  -9   1  425.36   40.40
  -9   9  -1  977.00   77.59
  -9   9  -1  984.30   75.99
  -9   9  -1  984.70   56.29
  -9   9  -1 1108.09   72.49
   9  -9   1 1025.80   76.09
   9  -9   1  996.20   62.39
   9  -9   1 1209.58   75.49
 -10   9  -1  495.95   59.99
 -10   9  -1  371.66   56.49
 -10   9  -1  430.56   51.59
  10  -9   1  361.86   43.20
  10  -9   1  316.07   46.60
  10  -9   1  461.35   61.09
 -11   9  -1  658.33   65.49
 -11   9  -1  584.44   72.39
 -11   9  -1  525.75   70.99
  11  -9   1  690.13   67.29
  11  -9   1  593.44   57.99
  11  -9   1  645.24   74.39
 -12   9  -1  932.41   69.49
 -12   9  -1  989.70   99.89
 -12   9  -1  752.42   85.89
  12  -9   1  855.81   65.69
  12  -9   1  875.91   88.99
  12  -9   1  981.30   75.29
 -13   9  -1   76.99   39.10
 -13   9  -1   96.49   34.00
 -13   9  -1  146.89   46.90
  13  -9   1  114.89   36.30
  13  -9   1   69.29   31.30
  13  -9   1  174.78   48.40
 -14   9  -1  301.67   64.49
 -14   9  -1  421.26   74.99
  14  -9   1  271.67   48.40
  14  -9   1  299.57   60.39
 -15   9  -1   32.10   43.30
 -15   9  -1   47.40   38.80
  15  -9   1   39.60   43.80
 -16   9  -1   22.60   44.50
 -16   9  -1  -12.90   39.70
  16  -9   1   30.90   47.40
  13   8  -1    4.40   43.90
  13   8  -1   97.79   66.39
 -13  -8   1   67.59   55.69
  12   8  -1    2.60   50.69
  12   8  -1    8.70   42.30
  12   8  -1   72.89   45.30
 -12  -8   1   40.00   33.20
 -12  -8   1   53.09   48.00
  11   8  -1   84.09   59.49
  11   8  -1   54.99   41.00
  11   8  -1   74.49   46.70
 -11  -8   1   44.40   43.20
 -11  -8   1  130.29   39.00
  10   8  -1  275.17   67.29
  10   8  -1  347.57   55.09
  10   8  -1  306.97   57.69
 -10  -8   1  328.47   58.79
 -10  -8   1  302.97   46.10
 -10  -8   1  247.18   37.40
   9   8  -1  512.35   77.79
   9   8  -1  450.25   62.99
   9   8  -1  512.15   59.79
  -9  -8   1  490.85   48.00
  -9  -8   1  515.55   53.19
  -9  -8   1  545.55   64.79
   8   8  -1  585.64   80.19
   8   8  -1  687.83   65.89
   8   8  -1  729.83   66.19
  -8  -8   1  634.44   52.59
  -8  -8   1  629.14   66.09
  -8  -8   1  613.64   49.70
   7   8  -1    5.30   25.80
   7   8  -1   32.10   28.90
   7   8  -1    8.60   35.80
  -7  -8   1   81.79   28.90
  -7  -8   1    5.90   18.20
  -7  -8   1    9.40   18.40
   6   8  -1  549.35   64.79
   6   8  -1  631.14   52.59
   6   8  -1  616.24   52.19
  -6  -8   1  525.75   42.40
  -6  -8   1  609.14   45.20
  -6  -8   1  672.63   53.29
   5   8  -1  108.09   25.80
   5   8  -1   76.29   22.90
   5   8  -1   38.60   28.90
  -5  -8   1   36.70   18.00
  -5  -8   1   61.69   17.10
  -5  -8   1   73.09   25.10
   4   8  -1   -4.10   16.60
   4   8  -1   35.90   27.70
   4   8  -1   16.80   16.90
  -4  -8   1   14.00   14.20
  -4  -8   1   -2.00   13.60
  -4  -8   1   12.60   11.90
   3   8  -1   20.00   16.00
   3   8  -1   11.10   13.60
   3   8  -1  -12.00   20.10
  -3  -8   1    7.80   15.30
  -3  -8   1   19.80   10.50
  -3  -8   1   12.60   14.60
   2   8  -1    7.90   11.70
   2   8  -1  -17.80   19.70
   2   8  -1    5.30   13.80
  -2  -8   1    0.60    8.40
  -2  -8   1   20.60   14.90
  -2  -8   1    1.30   13.50
   1   8  -1 3406.36  146.29
   1   8  -1 3081.19  123.89
  -1  -8   1 3260.37  135.59
  -1  -8   1 2963.30  123.19
  -1  -8   1 3226.68  136.29
   0   8  -1  404.96   32.20
   0   8  -1  277.67   35.80
   0   8  -1  353.46   20.70
   0  -8   1  384.96   31.10
   0  -8   1  287.57   35.20
   0  -8   1  320.47   32.90
   0  -8   1  320.07   33.70
  -1   8  -1 2758.12  114.09
  -1   8  -1 2526.35  114.09
  -1   8  -1 2523.35  105.59
  -1   8  -1 2452.15  109.59
   1  -8   1 2826.02  118.89
   1  -8   1 2505.85  113.29
   1  -8   1 2942.11  120.29
   1  -8   1 2896.91  109.69
  -2   8  -1 3007.90  122.79
  -2   8  -1 2752.02  123.29
  -2   8  -1 3048.69  122.99
   2  -8   1 2987.20  125.29
   2  -8   1 2959.80  129.69
   2  -8   1 2918.51  120.29
   2  -8   1 3050.69  127.19
   2  -8   1 2950.10  122.59
   2  -8   1 3019.10  121.89
  -3   8  -1  230.08   25.20
  -3   8  -1  186.08   22.10
  -3   8  -1  218.78   21.40
  -3   8  -1  234.88   27.20
   3  -8   1  198.68   27.40
   3  -8   1  227.58   23.60
   3  -8   1  244.78   22.40
   3  -8   1  183.48   22.40
   3  -8   1  232.88   26.30
  -4   8  -1   90.49   22.10
  -4   8  -1   97.59   21.70
  -4   8  -1  124.09   15.40
   4  -8   1  129.39   16.90
   4  -8   1  107.39   24.30
   4  -8   1  106.79   22.40
   4  -8   1  130.09   21.00
  -5   8  -1  934.31   46.00
  -5   8  -1 1005.30   61.69
  -5   8  -1  959.70   59.29
   5  -8   1  988.20   61.09
   5  -8   1  957.30   58.69
   5  -8   1 1051.29   50.09
  -6   8  -1  558.34   46.50
  -6   8  -1  523.55   31.00
  -6   8  -1  523.55   45.80
   6  -8   1  566.94   45.80
   6  -8   1  511.65   44.60
   6  -8   1  441.06   33.90
  -7   8  -1 1153.18   56.19
  -7   8  -1 1164.88   72.09
  -7   8  -1 1060.89   72.09
   7  -8   1 1163.78   60.89
   7  -8   1 1086.79   71.09
  -8   8  -1  261.57   39.80
  -8   8  -1  355.16   47.20
  -8   8  -1  343.77   48.30
  -8   8  -1  252.07   28.90
   8  -8   1  277.67   40.20
   8  -8   1  291.17   41.90
   8  -8   1  352.76   37.80
  -9   8  -1 1244.58   86.29
  -9   8  -1 1212.98   65.99
  -9   8  -1 1233.88   76.29
  -9   8  -1 1310.87   85.09
   9  -8   1 1210.48   70.29
   9  -8   1 1123.29   62.79
   9  -8   1 1395.56   80.49
   9  -8   1 1278.07   84.39
 -10   8  -1   35.40   27.80
 -10   8  -1   32.60   28.80
 -10   8  -1   27.90   23.40
  10  -8   1   17.00   25.60
  10  -8   1   91.69   26.80
  10  -8   1   59.19   26.00
 -11   8  -1  119.49   31.50
 -11   8  -1  161.48   41.90
 -11   8  -1  162.18   43.00
  11  -8   1  181.28   34.90
  11  -8   1  179.08   44.10
  11  -8   1  233.18   40.40
 -12   8  -1    5.70   31.10
 -12   8  -1    7.80   26.80
 -12   8  -1   -3.40   24.10
  12  -8   1   42.00   34.10
  12  -8   1  -25.20   20.60
  12  -8   1   10.00   25.00
 -13   8  -1  455.65   71.39
 -13   8  -1  447.26   66.19
 -13   8  -1  390.46   51.69
  13  -8   1  450.85   72.29
  13  -8   1  388.86   54.69
  13  -8   1  423.76   53.69
 -14   8  -1  395.26   67.29
 -14   8  -1  397.06   65.69
  14  -8   1  378.66   56.49
  14  -8   1  472.35   75.69
 -15   8  -1   18.60   39.50
 -15   8  -1   17.20   44.60
  15  -8   1   83.79   47.60
 -16   8  -1  591.74   90.29
 -16   8  -1  319.17   71.69
  16  -8   1  591.04   84.49
  13   7  -1  243.48   64.19
  13   7  -1  260.97   60.39
  13   7  -1  397.36   89.69
 -13  -7   1  326.47   55.99
 -13  -7   1  231.98   59.09
  12   7  -1   -4.60   37.20
  12   7  -1  -28.20   44.00
  12   7  -1   43.80   52.69
 -12  -7   1   29.10   45.40
 -12  -7   1   89.59   37.10
  11   7  -1  482.25   83.29
  11   7  -1  344.87   64.19
  11   7  -1  450.25   62.29
 -11  -7   1  517.15   69.09
 -11  -7   1  366.56   51.89
  10   7  -1  173.38   44.00
  10   7  -1   57.69   47.80
  10   7  -1   79.89   40.90
 -10  -7   1   70.99   36.90
 -10  -7   1  126.19   32.60
 -10  -7   1  103.29   26.60
   9   7  -1   45.80   30.20
   9   7  -1   -8.40   37.20
   9   7  -1   -4.30   33.00
  -9  -7   1   10.40   19.80
  -9  -7   1   11.50   23.70
  -9  -7   1   13.60   31.10
   8   7  -1    8.50   25.70
   8   7  -1   37.90   38.30
   8   7  -1   -4.10   23.50
  -8  -7   1   -1.20   16.20
  -8  -7   1    3.30   21.10
  -8  -7   1   39.20   29.40
   7   7  -1   47.80   38.00
   7   7  -1   61.39   26.70
   7   7  -1   71.19   30.50
   7   7  -1   67.69   18.60
  -7  -7   1   59.99   21.00
  -7  -7   1   71.49   28.30
  -7  -7   1   88.19   23.60
   6   7  -1 1394.76   81.59
   6   7  -1 1548.45   72.69
   6   7  -1 1451.25   84.39
   6   7  -1 1557.34  100.19
  -6  -7   1 1435.46   75.39
  -6  -7   1 1570.24   76.29
  -6  -7   1 1532.45   82.99
   5   7  -1  779.32   54.69
   5   7  -1  800.22   67.79
   5   7  -1  793.02   53.79
  -5  -7   1  779.52   48.50
  -5  -7   1  823.92   53.09
  -5  -7   1  761.62   45.80
   4   7  -1 3257.27  135.39
   4   7  -1 2990.50  133.39
   4   7  -1 3120.39  133.89
   4   7  -1 3252.57  150.98
  -4  -7   1 2995.50  131.29
  -4  -7   1 3157.58  134.39
  -4  -7   1 2969.50  126.69
   3   7  -1 1354.26   68.49
   3   7  -1 1548.25   86.49
   3   7  -1 1482.65   70.69
   3   7  -1 1435.86   67.99
  -3  -7   1 1398.26   62.19
  -3  -7   1 1435.76   69.49
  -3  -7   1 1323.67   68.79
   2   7  -1   53.49   24.70
   2   7  -1    9.30   13.50
   2   7  -1   19.50   11.90
   2   7  -1    9.10   11.50
  -2  -7   1   14.30    8.20
  -2  -7   1   25.30   14.40
  -2  -7   1   14.50   13.80
   1   7  -1  361.46   42.00
   1   7  -1  229.48   24.90
   1   7  -1  301.07   23.30
   1   7  -1  274.37   26.70
   1   7  -1  336.37   19.60
  -1  -7   1  300.17   19.40
  -1  -7   1  321.77   24.50
  -1  -7   1  341.07   31.60
  -1  -7   1  291.47   29.70
  -1  -7   1  243.48   33.20
  -1  -7   1  313.57   29.70
   0   7  -1  354.46   27.70
   0   7  -1  355.06   28.60
   0   7  -1  348.57   27.00
   0   7  -1  303.07   22.50
   0   7  -1  315.17   35.30
   0   7  -1  327.27   19.10
   0  -7   1  321.77   26.50
   0  -7   1  335.17   35.20
   0  -7   1  352.86   22.90
   0  -7   1  362.06   28.20
   0  -7   1  368.66   30.90
  -1   7  -1  980.40   49.70
  -1   7  -1  838.42   45.10
  -1   7  -1  918.71   50.09
  -1   7  -1  928.91   47.70
   1  -7   1  942.41   47.30
   1  -7   1 1032.20   44.40
   1  -7   1 1048.80   53.99
   1  -7   1  910.61   52.09
   1  -7   1  950.00   49.30
  -2   7  -1 2174.88   88.79
  -2   7  -1 2182.48   92.29
  -2   7  -1 1987.00   88.69
  -2   7  -1 2131.59   94.29
  -2   7  -1 1967.30   90.49
   2  -7   1 2172.88   91.99
   2  -7   1 2063.89   87.69
   2  -7   1 2069.09   87.69
   2  -7   1 2148.78   90.09
   2  -7   1 2000.20   94.89
   2  -7   1 2199.98   93.79
  -3   7  -1  143.29   16.20
  -3   7  -1  127.69   21.90
  -3   7  -1  162.08   20.20
  -3   7  -1  173.08   22.70
  -3   7  -1  115.49   20.00
   3  -7   1  208.58   18.40
   3  -7   1  172.18   20.60
   3  -7   1  188.48   27.00
   3  -7   1  142.19   21.70
   3  -7   1  152.78   20.50
  -4   7  -1 2930.11  135.79
  -4   7  -1 3266.87  124.69
  -4   7  -1 3098.29  132.09
  -4   7  -1 3114.99  135.39
  -4   7  -1 3202.88  135.69
   4  -7   1 3259.67  135.89
   4  -7   1 3117.99  136.79
   4  -7   1 2971.40  133.79
   4  -7   1 3295.57  133.29
   4  -7   1 3282.97  126.69
  -5   7  -1  134.49   25.20
  -5   7  -1   92.49   22.80
  -5   7  -1  131.19   15.80
   5  -7   1  124.59   24.50
   5  -7   1  139.59   19.70
   5  -7   1  105.39   22.70
  -6   7  -1  523.75   49.80
  -6   7  -1  372.36   43.40
  -6   7  -1  469.45   29.20
   6  -7   1  400.06   32.70
   6  -7   1  533.55   50.19
  -7   7  -1  319.67   27.80
  -7   7  -1  271.07   38.90
  -7   7  -1  330.27   42.80
   7  -7   1  310.07   43.30
   7  -7   1  400.66   37.90
  -8   7  -1  358.06   34.10
  -8   7  -1  392.56   44.60
  -8   7  -1  347.57   47.00
  -8   7  -1  256.87   39.20
   8  -7   1  290.37   43.80
   8  -7   1  360.36   39.00
   8  -7   1  345.37   42.40
   8  -7   1  296.67   29.80
  -9   7  -1  700.03   70.69
  -9   7  -1  735.33   62.79
  -9   7  -1  644.64   46.50
  -9   7  -1  700.63   52.89
   9  -7   1  716.83   62.79
   9  -7   1  648.44   54.39
   9  -7   1  604.34   42.80
   9  -7   1  742.43   52.19
 -10   7  -1  301.47   41.40
 -10   7  -1  351.16   56.39
 -10   7  -1  419.66   58.89
  10  -7   1  353.36   44.40
  10  -7   1  354.76   52.79
  10  -7   1  416.96   48.50
 -11   7  -1  900.41   62.79
 -11   7  -1  864.71   89.79
 -11   7  -1  923.91   90.49
  11  -7   1  782.22   64.09
  11  -7   1 1036.60   69.19
  11  -7   1  979.20   88.39
 -12   7  -1  840.92   62.89
 -12   7  -1  983.90   93.79
 -12   7  -1  808.02   86.59
  12  -7   1  931.51   70.49
  12  -7   1  894.91   93.79
  12  -7   1  938.41   68.29
 -13   7  -1   37.30   34.80
 -13   7  -1   22.00   34.10
  13  -7   1   70.29   32.20
  13  -7   1  161.38   49.70
 -14   7  -1  340.87   62.59
 -14   7  -1  435.46   75.29
  14  -7   1  348.27   64.49
  14  -7   1  226.08   52.69
 -15   7  -1  -10.70   33.30
 -15   7  -1  -29.80   39.10
  15  -7   1    8.90   39.60
  15  -7   1  -45.20   32.40
 -16   7  -1   45.80   41.70
 -16   7  -1   11.60   45.50
  16  -7   1  -58.39   37.00
  13   6  -1  -12.40   51.39
  13   6  -1  -40.50   39.50
  13   6  -1   37.50   40.90
 -13  -6   1   36.80   36.20
 -13  -6   1   24.70   43.80
  12   6  -1   47.20   49.50
  12   6  -1   46.90   38.10
  12   6  -1    8.20   41.70
 -12  -6   1  -18.90   40.80
 -12  -6   1   -9.60   29.80
  11   6  -1  297.07   58.39
  11   6  -1  279.27   54.09
  11   6  -1  174.58   59.39
 -11  -6   1  290.87   56.89
 -11  -6   1  217.88   45.30
  10   6  -1  167.98   54.09
  10   6  -1  190.98   50.99
  10   6  -1  245.18   45.80
 -10  -6   1  176.88   29.50
 -10  -6   1  361.46   53.29
 -10  -6   1  263.57   45.10
   9   6  -1 1305.47   85.49
   9   6  -1 1388.86   94.09
   9   6  -1 1281.77  104.29
  -9  -6   1 1205.98   78.29
  -9  -6   1 1147.69   68.09
  -9  -6   1 1174.58   84.99
   8   6  -1  697.63   64.59
   8   6  -1  688.53   78.59
   8   6  -1  727.13   61.39
  -8  -6   1  696.23   55.29
  -8  -6   1  686.83   47.80
  -8  -6   1  734.83   61.69
   7   6  -1   62.19   29.80
   7   6  -1   51.29   37.50
   7   6  -1   35.90   25.10
  -7  -6   1   64.59   17.90
  -7  -6   1   44.10   25.20
  -7  -6   1   66.19   19.00
  -7  -6   1   70.39   22.70
   6   6  -1  955.90   59.69
   6   6  -1  977.30   63.89
   6   6  -1  842.92   47.60
   6   6  -1  901.21   74.99
  -6  -6   1  922.41   59.89
  -6  -6   1  835.22   50.39
  -6  -6   1  838.62   50.19
  -6  -6   1  895.81   53.89
   5   6  -1   46.50   22.30
   5   6  -1   46.10   21.40
   5   6  -1   14.20   26.70
  -5  -6   1   33.50   18.30
  -5  -6   1   61.59   16.70
  -5  -6   1   69.09   16.80
   4   6  -1  584.04   35.10
   4   6  -1  516.95   40.60
   4   6  -1  542.55   39.50
   4   6  -1  561.04   38.30
   4   6  -1  454.05   50.49
  -4  -6   1  471.65   34.60
  -4  -6   1  521.65   33.20
  -4  -6   1  471.75   37.60
   3   6  -1  565.54   36.40
   3   6  -1  509.65   36.50
   3   6  -1  549.65   50.19
   3   6  -1  485.65   34.20
   3   6  -1  482.95   32.40
  -3  -6   1  486.75   34.10
  -3  -6   1  466.55   34.90
  -3  -6   1  516.15   29.70
   2   6  -1  197.88   21.10
   2   6  -1  177.08   20.40
   2   6  -1  160.28   21.50
   2   6  -1  259.97   36.80
   2   6  -1  223.48   22.60
  -2  -6   1  210.18   33.70
  -2  -6   1  219.58   16.70
  -2  -6   1  230.88   23.90
  -2  -6   1  271.77   25.80
  -2  -6   1  264.37   26.10
   1   6  -1 3163.88  130.29
   1   6  -1 3068.49  129.19
   1   6  -1 3230.28  138.99
   1   6  -1 3393.36  126.09
   1   6  -1 3051.19  122.49
  -1  -6   1 3181.68  129.89
  -1  -6   1 3155.48  130.99
  -1  -6   1 3181.88  126.79
  -1  -6   1 3213.78  129.89
  -1  -6   1 3179.28  121.99
  -1  -6   1 3084.49  136.69
   0   6  -1  658.63   35.20
   0   6  -1  497.55   39.20
   0   6  -1  545.85   32.70
   0   6  -1  525.55   28.60
   0   6  -1  620.74   34.70
   0   6  -1  578.94   26.00
   0  -6   1  567.84   36.30
   0  -6   1  526.15   32.80
   0  -6   1  530.45   38.90
   0  -6   1  511.95   33.10
   0  -6   1  603.24   29.90
  -1   6  -1 1757.42   74.39
  -1   6  -1 1738.63   77.59
  -1   6  -1 1654.73   72.89
   1  -6   1 1757.62   78.99
   1  -6   1 1820.52   76.19
   1  -6   1 1809.62   71.59
   1  -6   1 1726.03   78.89
   1  -6   1 1636.84   73.69
  -2   6  -1 1256.27   60.59
  -2   6  -1 1372.46   59.69
  -2   6  -1 1318.47   63.29
  -2   6  -1 1278.07   60.99
  -2   6  -1 1316.27   57.89
   2  -6   1 1382.66   57.39
   2  -6   1 1317.97   64.39
   2  -6   1 1225.18   58.39
   2  -6   1 1350.46   61.19
   2  -6   1 1351.96   59.59
  -3   6  -1  298.77   21.20
  -3   6  -1  322.97   25.10
  -3   6  -1  311.77   29.80
  -3   6  -1  359.56   20.00
  -3   6  -1  317.47   28.80
  -3   6  -1  325.57   27.40
   3  -6   1  360.26   33.60
   3  -6   1  345.07   21.30
   3  -6   1  314.67   28.90
   3  -6   1  353.46   25.90
   3  -6   1  326.77   27.00
   3  -6   1  315.67   21.30
  -4   6  -1  170.68   23.60
  -4   6  -1  137.59   20.10
  -4   6  -1  155.18   21.60
  -4   6  -1  170.18   24.50
  -4   6  -1  183.38   15.90
   4  -6   1  137.29   15.90
   4  -6   1  191.48   24.80
   4  -6   1  130.09   21.40
   4  -6   1  125.69   23.10
   4  -6   1  147.59   21.00
  -5   6  -1  508.95   42.50
  -5   6  -1  498.25   37.60
  -5   6  -1  543.25   30.00
  -5   6  -1  540.55   41.80
   5  -6   1  533.25   41.80
   5  -6   1  469.85   39.00
   5  -6   1  512.85   33.60
   5  -6   1  494.35   42.70
  -6   6  -1 1087.19   53.79
  -6   6  -1 1109.89   67.79
  -6   6  -1 1143.09   66.59
   6  -6   1 1196.98   67.59
   6  -6   1 1054.19   57.19
   6  -6   1 1034.20   52.59
  -7   6  -1 2573.14  125.99
  -7   6  -1 2657.53  120.39
  -7   6  -1 2653.33  128.99
  -7   6  -1 2674.93  113.29
   7  -6   1 2528.65  115.39
   7  -6   1 2552.34  120.49
   7  -6   1 2792.62  127.59
   7  -6   1 2485.65  110.39
  -8   6  -1  547.45   44.90
  -8   6  -1  570.04   59.09
  -8   6  -1  568.04   55.09
   8  -6   1  511.45   42.90
   8  -6   1  583.14   47.10
   8  -6   1  477.25   52.89
  -9   6  -1 1222.68   80.79
  -9   6  -1 1196.28   68.79
  -9   6  -1 1157.28   81.99
   9  -6   1 1128.19   70.29
   9  -6   1 1190.98   70.99
   9  -6   1 1186.98   81.69
 -10   6  -1    9.80   19.00
 -10   6  -1   -6.90   24.20
 -10   6  -1   11.90   23.20
  10  -6   1  -17.00   19.30
  10  -6   1   17.90   20.90
  10  -6   1   40.00   26.80
 -11   6  -1   -4.80   28.80
 -11   6  -1   -3.60   25.10
 -11   6  -1   27.80   21.90
  11  -6   1   30.60   25.70
  11  -6   1   15.00   28.90
  11  -6   1    1.10   20.40
 -12   6  -1   32.40   33.20
 -12   6  -1   21.10   34.40
 -12   6  -1   20.90   22.60
  12  -6   1   50.29   28.90
  12  -6   1   39.70   34.40
  12  -6   1   39.30   25.20
 -13   6  -1  573.54   76.79
 -13   6  -1  595.64   77.29
  13  -6   1  643.64   82.69
  13  -6   1  479.25   64.49
 -14   6  -1  406.36   69.49
 -14   6  -1  388.76   67.39
  14  -6   1  377.06   67.09
  14  -6   1  313.77   57.99
 -15   6  -1    8.80   42.60
 -15   6  -1   64.79   44.60
  15  -6   1  -29.80   37.10
  15  -6   1   -7.50   38.20
 -16   6  -1  404.46   77.59
 -16   6  -1  617.94   86.49
  16  -6   1  396.46   74.59
  14   5  -1  325.47   78.29
  14   5  -1  251.37   68.79
  14   5  -1  376.56   66.99
 -14  -5   1  279.07   67.49
 -14  -5   1  254.67   57.29
  13   5  -1  360.56   78.29
  13   5  -1  331.77   63.19
  13   5  -1  325.47   70.59
 -13  -5   1  249.78   53.09
 -13  -5   1  383.46   68.89
  12   5  -1   32.60   46.00
  12   5  -1   81.99   42.30
  12   5  -1  127.39   60.19
 -12  -5   1   85.09   44.90
 -12  -5   1  120.49   41.60
  11   5  -1  315.07   66.49
  11   5  -1  545.55   65.19
  11   5  -1  410.06   66.89
 -11  -5   1  393.76   41.70
 -11  -5   1  446.16   61.79
 -11  -5   1  434.26   57.79
  10   5  -1  168.38   46.80
  10   5  -1   87.69   46.70
  10   5  -1  122.39   38.10
 -10  -5   1  146.09   26.80
 -10  -5   1  151.08   37.60
 -10  -5   1  156.88   41.70
   9   5  -1  -33.70   27.10
   9   5  -1   18.20   28.70
   9   5  -1   -2.30   35.80
  -9  -5   1   13.60   15.60
  -9  -5   1  -22.20   23.00
  -9  -5   1    7.50   28.00
   8   5  -1   15.70   32.50
   8   5  -1   23.80   26.40
   8   5  -1   40.10   31.00
  -8  -5   1   26.60   23.00
  -8  -5   1   12.20   15.80
  -8  -5   1   18.00   16.20
  -8  -5   1   -4.10   22.40
   7   5  -1   -6.10   25.40
   7   5  -1   -9.50   22.70
   7   5  -1    2.30   21.20
  -7  -5   1    4.00   19.50
  -7  -5   1   -2.60   18.00
  -7  -5   1  -15.40   12.30
  -7  -5   1   -6.50   13.40
   6   5  -1 1297.77   72.89
   6   5  -1 1298.17   84.29
   6   5  -1 1279.07   77.09
  -6  -5   1 1198.58   67.19
  -6  -5   1 1217.68   62.79
  -6  -5   1 1215.48   71.09
  -6  -5   1 1316.77   63.59
   5   5  -1   39.20   18.30
   5   5  -1   18.20   20.70
   5   5  -1   44.80   26.40
  -5  -5   1   46.50   17.40
  -5  -5   1   76.89   18.90
  -5  -5   1   57.59   15.80
  -5  -5   1   52.39   13.80
   4   5  -1 2608.14  111.99
   4   5  -1 2447.46  111.39
   4   5  -1 2717.83  125.49
   4   5  -1 2581.44  114.49
   4   5  -1 2472.45  106.69
  -4  -5   1 2619.04  107.79
  -4  -5   1 2473.75  111.09
  -4  -5   1 2482.65  107.19
   3   5  -1 2921.41  119.79
   3   5  -1 2835.32  129.29
   3   5  -1 2748.32  117.39
   3   5  -1 2700.73  117.49
   3   5  -1 2887.01  115.69
   3   5  -1 2628.54  119.49
  -3  -5   1 2842.52  117.99
  -3  -5   1 2864.31  113.39
  -3  -5   1 2734.63  119.19
  -3  -5   1 2848.11  116.09
   2   5  -1  131.49   19.60
   2   5  -1  178.78   21.30
   2   5  -1  140.09   17.20
   2   5  -1  110.29   25.20
   2   5  -1  140.59   17.70
  -2  -5   1  113.49   18.70
  -2  -5   1  150.58   18.60
  -2  -5   1  177.78   21.30
  -2  -5   1   97.39   22.30
  -2  -5   1  159.78   14.20
   1   5  -1  755.82   47.80
   1   5  -1  796.92   40.10
   1   5  -1  802.12   37.10
   1   5  -1  799.52   40.70
   1   5  -1  725.53   33.80
   1   5  -1  777.12   39.50
  -1  -5   1  737.73   38.10
  -1  -5   1  802.02   40.00
  -1  -5   1  774.52   39.90
  -1  -5   1  796.82   33.20
  -1  -5   1  762.62   40.50
  -1  -5   1  736.73   46.50
   0   5  -1    9.80    8.10
   0   5  -1   -1.10    6.70
   0   5  -1   18.40    9.60
   0   5  -1   15.70    5.50
   0   5  -1    0.10    9.90
   0   5  -1   -4.10   12.90
   0  -5   1   11.00    9.10
   0  -5   1    6.40   13.20
   0  -5   1    9.40    8.80
   0  -5   1    3.10   10.90
   0  -5   1   12.30    8.50
  -1   5  -1 1880.51   83.09
  -1   5  -1 2072.19   85.39
  -1   5  -1 2208.98   87.99
  -1   5  -1 2026.00   84.79
  -1   5  -1 2095.09   84.29
   1  -5   1 2209.68   85.99
   1  -5   1 2169.48   88.69
   1  -5   1 1936.51   87.59
   1  -5   1 1925.91   81.79
  -2   5  -1 2525.25  105.09
  -2   5  -1 2552.34  104.79
  -2   5  -1 2560.74  106.49
  -2   5  -1 2586.84  101.19
  -2   5  -1 2471.15  103.09
   2  -5   1 2588.64  100.99
   2  -5   1 2432.36  103.29
   2  -5   1 2578.84  103.49
   2  -5   1 2507.65  104.29
   2  -5   1 2545.45  107.09
   2  -5   1 2660.43  100.09
  -3   5  -1  371.86   29.00
  -3   5  -1  375.76   20.00
  -3   5  -1  283.57   24.00
  -3   5  -1  404.86   29.30
  -3   5  -1  401.86   28.70
   3  -5   1  370.66   29.10
   3  -5   1  321.57   27.10
   3  -5   1  363.06   21.30
   3  -5   1  358.26   26.30
   3  -5   1  419.46   28.70
  -4   5  -1 3498.45  143.79
  -4   5  -1 3556.04  143.69
  -4   5  -1 3455.55  135.89
  -4   5  -1 3491.45  146.09
  -4   5  -1 3552.44  147.39
   4  -5   1 3509.05  145.59
   4  -5   1 3468.95  139.19
   4  -5   1 3557.54  144.39
   4  -5   1 3356.86  145.19
   4  -5   1 3349.96  143.89
  -5   5  -1   54.79   18.80
  -5   5  -1   55.59   15.60
  -5   5  -1   29.80   11.90
  -5   5  -1   54.19   16.90
  -5   5  -1   38.40   18.20
   5  -5   1   46.40   11.70
   5  -5   1    5.20   16.00
   5  -5   1   67.29   16.60
   5  -5   1   32.10   15.00
  -6   5  -1    9.30   16.90
  -6   5  -1   15.70   16.30
  -6   5  -1   19.20   13.50
  -6   5  -1   47.90   21.80
  -6   5  -1    9.90   11.30
   6  -5   1   28.60   16.90
   6  -5   1    8.40   14.10
   6  -5   1   25.00   18.90
  -7   5  -1  161.78   30.70
  -7   5  -1  197.98   34.80
  -7   5  -1  160.48   26.50
  -7   5  -1  154.68   23.10
   7  -5   1  185.78   28.80
   7  -5   1  215.78   30.10
   7  -5   1  201.18   35.00
  -8   5  -1  432.86   41.60
  -8   5  -1  342.67   46.40
  -8   5  -1  409.46   49.90
   8  -5   1  425.56   50.39
   8  -5   1  446.76   44.40
   8  -5   1  415.36   41.60
  -9   5  -1  548.55   48.10
  -9   5  -1  408.06   55.59
  -9   5  -1  456.15   55.59
   9  -5   1  549.45   53.09
   9  -5   1  476.25   57.89
   9  -5   1  552.54   50.39
 -10   5  -1   97.69   32.00
 -10   5  -1   79.29   23.70
 -10   5  -1   22.40   26.60
  10  -5   1   26.20   26.10
  10  -5   1   38.70   23.40
  10  -5   1   32.90   21.70
 -11   5  -1  848.52   83.09
 -11   5  -1 1075.49   83.49
 -11   5  -1  908.41   60.09
  11  -5   1  889.81   70.89
  11  -5   1 1103.89   83.59
  11  -5   1 1048.60   65.29
 -12   5  -1  673.63   76.59
 -12   5  -1  740.33   53.49
 -12   5  -1  776.82   86.79
  12  -5   1  807.92   86.19
  12  -5   1  690.73   54.29
  12  -5   1  696.83   72.09
 -13   5  -1  122.69   46.90
 -13   5  -1    2.40   30.40
  13  -5   1   95.19   40.10
  13  -5   1   30.70   34.30
 -14   5  -1  247.68   57.29
 -14   5  -1  141.79   45.60
  14  -5   1  225.28   57.89
  14  -5   1   46.80   37.90
 -15   5  -1   11.30   42.20
 -15   5  -1   17.10   40.40
  15  -5   1  -65.19   32.40
  15  -5   1   36.10   44.30
 -16   5  -1   -3.00   41.20
 -16   5  -1   11.30   48.70
  16  -5   1   38.90   47.30
  14   4  -1   32.60   50.19
  14   4  -1   22.40   47.00
  14   4  -1   29.90   51.19
 -14  -4   1    6.80   43.00
 -14  -4   1   -5.30   39.70
  13   4  -1   17.60   45.00
  13   4  -1  -27.90   36.10
  13   4  -1   40.50   48.80
 -13  -4   1  -51.19   32.70
 -13  -4   1  -25.00   40.10
  12   4  -1   23.40   44.10
  12   4  -1  -30.90   32.60
  12   4  -1   -4.40   38.70
 -12  -4   1   -5.60   32.20
 -12  -4   1  -20.50   37.50
  11   4  -1  423.06   68.79
  11   4  -1  387.26   56.79
  11   4  -1  370.06   70.39
 -11  -4   1  381.16   40.50
 -11  -4   1  477.35   65.49
  10   4  -1  255.87   45.40
  10   4  -1  217.68   53.39
  10   4  -1  225.28   53.89
 -10  -4   1  225.18   31.30
 -10  -4   1  304.17   49.60
   9   4  -1 1570.74   96.29
   9   4  -1 1777.12  108.79
   9   4  -1 1630.54  110.29
  -9  -4   1 1633.04   98.39
  -9  -4   1 1637.54   81.59
   8   4  -1  800.22   61.69
   8   4  -1  685.63   72.49
   8   4  -1  755.82   67.59
  -8  -4   1  650.73   58.39
  -8  -4   1  709.33   46.70
  -8  -4   1  767.52   46.70
   7   4  -1   86.69   27.60
   7   4  -1   60.89   28.90
   7   4  -1  100.49   31.20
  -7  -4   1  137.39   30.40
  -7  -4   1  117.39   20.60
  -7  -4   1  136.99   21.30
   6   4  -1  886.81   67.39
   6   4  -1  884.91   58.39
   6   4  -1  934.21   63.99
  -6  -4   1  902.21   49.00
  -6  -4   1  895.01   49.60
  -6  -4   1  968.80   59.59
   5   4  -1   36.00   23.30
   5   4  -1   41.10   17.20
   5   4  -1   10.90   20.10
  -5  -4   1   37.60   16.80
  -5  -4   1   49.80   13.30
  -5  -4   1   25.40   12.30
   4   4  -1 1522.25   82.09
   4   4  -1 1511.35   75.89
   4   4  -1 1500.15   72.09
   4   4  -1 1344.97   70.59
   4   4  -1 1420.96   65.99
  -4  -4   1 1512.75   71.99
  -4  -4   1 1490.25   66.99
  -4  -4   1 1447.06   66.39
  -4  -4   1 1570.24   80.59
   3   4  -1  277.47   21.90
   3   4  -1  296.57   24.90
   3   4  -1  314.07   37.50
   3   4  -1  316.87   28.50
   3   4  -1  323.07   26.50
   3   4  -1  319.77   26.20
  -3  -4   1  328.27   26.00
  -3  -4   1  292.57   26.10
  -3  -4   1  270.57   31.20
  -3  -4   1  304.07   23.20
   2   4  -1  234.78   20.00
   2   4  -1  201.58   27.30
   2   4  -1  234.28   18.90
   2   4  -1  270.87   23.50
   2   4  -1  218.48   20.10
   2   4  -1  195.88   20.70
  -2  -4   1  247.58   20.70
  -2  -4   1  219.98   19.50
  -2  -4   1  200.28   24.80
  -2  -4   1  159.68   17.90
  -2  -4   1  210.58   15.80
   1   4  -1 3151.68  117.49
   1   4  -1 2791.42  124.89
   1   4  -1 2891.41  113.99
   1   4  -1 3067.79  118.99
   1   4  -1 3034.90  119.09
   1   4  -1 3050.69  118.89
  -1  -4   1 3103.49  119.19
  -1  -4   1 2873.71  124.49
  -1  -4   1 3042.20  113.39
  -1  -4   1 2865.81  117.89
  -1  -4   1 2852.01  118.69
  -1  -4   1 3047.00  118.59
   0   4  -1   82.09   12.60
   0   4  -1   89.09    7.60
   0   4  -1   81.59   12.70
   0   4  -1   37.40   13.70
   0   4  -1  114.29   13.00
   0  -4   1  105.89   11.60
   0  -4   1   68.29   11.10
   0  -4   1   88.89   16.60
  -1   4  -1  101.19   14.70
  -1   4  -1   97.89   11.70
  -1   4  -1  110.09   11.10
   1  -4   1   92.69   10.70
   1  -4   1   73.59    9.70
  -2   4  -1  276.77   22.90
  -2   4  -1  404.56   23.50
  -2   4  -1  352.16   20.60
  -2   4  -1  411.76   18.60
  -2   4  -1  435.76   26.50
   2  -4   1  349.27   25.90
   2  -4   1  341.37   23.90
   2  -4   1  406.26   19.10
   2  -4   1  397.86   23.80
   2  -4   1  374.26   20.30
   2  -4   1  282.77   22.70
  -3   4  -1  567.54   34.00
  -3   4  -1  609.24   27.90
  -3   4  -1  564.14   35.80
  -3   4  -1  572.14   36.50
  -3   4  -1  625.04   34.30
   3  -4   1  635.64   36.20
   3  -4   1  595.84   34.90
   3  -4   1  604.44   36.00
   3  -4   1  587.14   35.00
   3  -4   1  555.34   29.30
  -4   4  -1  443.76   26.60
  -4   4  -1  511.15   36.50
  -4   4  -1  488.45   35.60
  -4   4  -1  533.55   34.00
  -4   4  -1  519.15   31.70
   4  -4   1  467.35   33.30
   4  -4   1  460.45   27.60
   4  -4   1  422.36   33.60
   4  -4   1  470.35   35.20
   4  -4   1  480.25   30.40
   4  -4   1  492.65   33.90
  -5   4  -1  389.16   28.60
  -5   4  -1  408.36   31.20
  -5   4  -1  425.36   33.40
  -5   4  -1  419.96   34.00
  -5   4  -1  412.26   38.80
  -5   4  -1  382.66   39.60
   5  -4   1  373.16   30.20
   5  -4   1  404.56   35.90
   5  -4   1  464.25   40.30
   5  -4   1  435.36   35.40
  -6   4  -1 2050.99   93.19
  -6   4  -1 2014.30   91.99
  -6   4  -1 2139.59   94.69
  -6   4  -1 1981.90  102.19
  -6   4  -1 2012.30  100.49
   6  -4   1 2084.19   94.69
   6  -4   1 2043.10   94.69
   6  -4   1 2105.19  101.09
  -7   4  -1  848.62   57.59
  -7   4  -1  744.53   48.10
  -7   4  -1  808.92   58.99
  -7   4  -1  821.52   48.60
   7  -4   1  733.73   50.79
   7  -4   1  824.22   49.80
   7  -4   1  814.62   57.49
  -8   4  -1  414.66   50.09
  -8   4  -1  476.35   41.90
  -8   4  -1  438.56   51.79
   8  -4   1  452.05   41.70
   8  -4   1  477.65   47.40
   8  -4   1  365.86   48.60
  -9   4  -1  995.40   74.09
  -9   4  -1  951.80   58.29
  -9   4  -1  993.80   72.99
   9  -4   1 1005.20   66.99
   9  -4   1 1043.60   72.99
   9  -4   1 1179.18   63.29
 -10   4  -1   43.60   27.60
 -10   4  -1  -25.40   19.00
 -10   4  -1    3.00   15.30
  10  -4   1    2.30   17.50
  10  -4   1    8.40   23.80
  10  -4   1  -22.30   19.00
 -11   4  -1  -22.50   22.30
 -11   4  -1    0.40   29.60
  11  -4   1    6.40   24.10
  11  -4   1   40.10   32.80
  11  -4   1   -4.50   16.60
 -12   4  -1   81.09   38.40
 -12   4  -1   60.79   35.20
  12  -4   1   40.70   24.70
  12  -4   1   57.29   34.70
  12  -4   1   75.69   39.10
 -13   4  -1  157.68   46.40
 -13   4  -1   64.99   36.40
  13  -4   1  159.28   45.20
  13  -4   1  165.58   45.50
 -14   4  -1  194.18   54.99
 -14   4  -1  226.88   54.49
  14  -4   1  178.78   52.19
  14  -4   1  173.98   49.90
 -15   4  -1   35.00   46.40
 -15   4  -1  -18.60   33.40
  15  -4   1   36.70   43.00
  15  -4   1  -75.49   37.30
 -16   4  -1  511.05   82.29
 -16   4  -1  670.43   95.59
  16  -4   1  433.46   82.89
  16  -4   1  615.14   91.99
  14   3  -1  282.77   70.29
  14   3  -1  333.37   74.19
  14   3  -1  340.27   64.59
 -14  -3   1  300.67   64.79
 -14  -3   1  180.18   49.50
  13   3  -1  277.27   63.29
  13   3  -1  399.26   61.99
  13   3  -1  334.57   72.19
 -13  -3   1  297.27   58.99
 -13  -3   1  428.26   70.79
  12   3  -1  184.48   54.39
  12   3  -1  214.18   49.00
  12   3  -1  240.28   59.99
 -12  -3   1  208.28   52.09
  11   3  -1  784.32   88.89
  11   3  -1  777.12   90.29
  11   3  -1  688.43   69.19
 -11  -3   1  711.73   76.29
 -11  -3   1  613.54   47.80
  10   3  -1   -0.70   32.90
  10   3  -1  -11.00   25.00
 -10  -3   1   37.00   17.60
 -10  -3   1   17.20   30.50
   9   3  -1  173.78   37.10
   9   3  -1  135.99   41.30
  -9  -3   1  119.19   22.70
  -9  -3   1  111.19   32.40
  -9  -3   1  112.69   25.40
   8   3  -1   16.40   22.60
   8   3  -1    4.40   27.00
  -8  -3   1   20.00   15.90
  -8  -3   1   37.30   22.60
  -8  -3   1   10.60   20.50
  -8  -3   1   28.90   15.70
   7   3  -1   41.70   23.90
   7   3  -1   60.09   27.90
  -7  -3   1   23.80   13.70
  -7  -3   1   75.19   22.50
  -7  -3   1   22.00   14.00
  -7  -3   1   45.90   23.20
   6   3  -1 3789.12  159.08
   6   3  -1 3626.34  166.78
  -6  -3   1 3614.44  149.09
  -6  -3   1 3619.84  150.08
  -6  -3   1 3731.83  159.78
  -6  -3   1 3579.84  158.08
   5   3  -1   76.39   19.50
   5   3  -1   64.49   24.00
   5   3  -1   57.39   18.30
  -5  -3   1   30.30   11.80
  -5  -3   1   39.00   16.10
  -5  -3   1   42.40   16.50
  -5  -3   1   37.60   12.70
   4   3  -1 3765.52  155.98
   4   3  -1 3397.76  147.59
   4   3  -1 3421.36  148.79
   4   3  -1 3679.33  148.19
  -4  -3   1 3566.54  153.28
  -4  -3   1 3421.56  148.39
  -4  -3   1 3677.13  142.79
  -4  -3   1 3612.84  148.19
  -4  -3   1 3515.25  141.99
  -4  -3   1 3604.54  147.79
   3   3  -1 4182.58  173.68
   3   3  -1 4404.46  177.78
   3   3  -1 4334.17  170.68
   3   3  -1 4201.58  171.18
   3   3  -1 4294.47  166.98
   3   3  -1 4269.57  170.58
  -3  -3   1 4280.47  166.78
  -3  -3   1 4274.87  176.08
  -3  -3   1 4396.96  171.88
  -3  -3   1 4231.98  170.48
   2   3  -1    0.10    7.60
   2   3  -1    0.80    7.00
   2   3  -1    8.20    7.40
   2   3  -1   -4.00    8.00
   2   3  -1    8.80   10.10
   2   3  -1   16.60   15.30
  -2  -3   1    8.60   11.40
  -2  -3   1   -8.80    7.10
  -2  -3   1   -0.50    7.20
  -2  -3   1    6.00    6.90
   1   3  -1  309.87   19.40
   1   3  -1  318.07   20.10
   1   3  -1  284.17   18.80
  -1  -3   1  216.48   18.80
  -1  -3   1  324.07   15.40
  -1  -3   1  320.97   26.30
  -1  -3   1  349.87   20.20
   0   3  -1   -4.70    4.00
   0   3  -1   -2.70    3.50
   0   3  -1    6.00    4.70
   0   3  -1    0.30    5.10
   0   3  -1    2.20    4.20
   0   3  -1   -3.00    1.90
   0   3  -1   -1.00    2.30
   0  -3   1   -1.70    3.60
   0  -3   1   -4.60    3.50
   0  -3   1   -0.70    3.50
   0  -3   1   -5.70    5.90
   0  -3   1   -4.80    4.50
  -1   3  -1   -6.10    3.60
  -1   3  -1   -1.20    3.50
  -1   3  -1    3.50    3.90
  -1   3  -1   -1.30    3.80
   1  -3   1    0.80    4.00
   1  -3   1   -0.70    3.80
   1  -3   1   -3.90    3.10
  -2   3  -1 1451.55   73.59
  -2   3  -1 1821.62   74.79
   2  -3   1 1962.40   76.79
   2  -3   1 1817.72   69.89
   2  -3   1 1985.10   75.89
  -3   3  -1  217.98   22.50
  -3   3  -1  233.68   22.30
  -3   3  -1  194.88   20.60
  -3   3  -1  232.68   19.50
   3  -3   1  245.78   22.90
   3  -3   1  208.08   17.00
   3  -3   1  204.18   18.70
   3  -3   1  213.58   22.10
   3  -3   1  219.78   21.80
   3  -3   1  269.57   22.80
  -4   3  -1 1798.02   77.19
  -4   3  -1 1759.22   80.39
  -4   3  -1 1946.21   84.89
  -4   3  -1 1731.73   76.59
  -4   3  -1 1821.22   78.99
  -4   3  -1 1694.23   81.79
   4  -3   1 1721.43   77.39
   4  -3   1 1649.33   81.69
   4  -3   1 1788.82   81.99
   4  -3   1 1780.62   80.89
  -5   3  -1   15.40   13.60
  -5   3  -1   56.49   14.10
  -5   3  -1   62.79   18.20
  -5   3  -1   39.60   13.60
  -5   3  -1   50.99   18.80
  -5   3  -1   38.90   14.80
   5  -3   1   21.00   15.20
   5  -3   1   38.80   15.40
   5  -3   1   32.40   16.00
   5  -3   1   46.20   16.50
   5  -3   1   45.70   14.70
  -6   3  -1  923.31   51.09
  -6   3  -1  902.51   58.29
  -6   3  -1  968.50   52.79
  -6   3  -1 1012.10   51.79
  -6   3  -1  913.11   59.89
   6  -3   1  956.20   51.59
   6  -3   1  882.11   58.59
   6  -3   1  874.41   54.39
  -7   3  -1  117.99   27.30
  -7   3  -1  104.09   19.40
  -7   3  -1   92.59   23.30
  -7   3  -1   71.49   18.40
   7  -3   1  100.79   23.60
   7  -3   1   96.19   23.40
   7  -3   1   62.59   17.30
  -8   3  -1  139.29   30.00
  -8   3  -1  106.49   29.90
  -8   3  -1  132.09   22.00
  -8   3  -1  107.79   21.50
   8  -3   1  118.89   22.40
   8  -3   1  156.38   33.30
   8  -3   1  135.89   28.90
  -9   3  -1  815.82   49.00
  -9   3  -1  869.61   66.99
  -9   3  -1  784.22   64.69
   9  -3   1  737.73   62.29
   9  -3   1  852.61   50.49
   9  -3   1  782.72   60.29
 -10   3  -1   60.09   27.70
 -10   3  -1   35.90   18.20
 -10   3  -1   54.69   31.10
  10  -3   1   44.20   18.40
  10  -3   1   42.00   28.00
  10  -3   1   11.80   24.80
 -11   3  -1 1704.13  110.19
 -11   3  -1 1666.33  108.09
  11  -3   1 1768.82  105.19
  11  -3   1 1797.02  109.99
  11  -3   1 1682.83   84.09
 -12   3  -1  370.96   59.49
 -12   3  -1  270.37   51.79
  12  -3   1  301.87   55.39
  12  -3   1  317.67   53.69
 -13   3  -1   48.60   35.90
 -13   3  -1   42.00   37.40
  13  -3   1   17.90   35.90
  13  -3   1   86.29   41.00
 -14   3  -1    0.60   38.00
 -14   3  -1  -32.20   29.90
  14  -3   1   10.10   37.70
  14  -3   1    5.40   38.50
 -15   3  -1   37.70   40.70
 -15   3  -1   90.89   48.40
  15  -3   1   -9.90   40.60
  15  -3   1  -82.59   38.80
 -16   3  -1  188.48   60.09
  16  -3   1  154.78   55.99
  16  -3   1  164.18   65.69
  15   2  -1   81.49   57.49
  15   2  -1   13.70   52.29
  15   2  -1   33.70   46.10
 -15  -2   1   42.40   50.29
 -15  -2   1  127.09   48.80
  14   2  -1   20.40   37.20
  14   2  -1   55.29   49.20
  14   2  -1    4.10   45.50
 -14  -2   1  -29.80   41.90
  13   2  -1    3.90   40.60
  13   2  -1   56.49   45.20
  13   2  -1   32.50   37.70
 -13  -2   1   10.00   38.30
  12   2  -1   81.49   45.70
  12   2  -1   53.19   33.50
 -12  -2   1   11.60   33.60
 -12  -2   1   53.59   21.80
  11   2  -1  758.62   86.99
  11   2  -1  623.24   65.79
 -11  -2   1  669.73   74.59
 -11  -2   1  587.64   47.10
  10   2  -1   45.00   29.10
  10   2  -1   73.59   36.80
 -10  -2   1   31.30   17.70
 -10  -2   1   67.89   28.50
 -10  -2   1  133.89   37.10
   9   2  -1  984.70   71.39
   9   2  -1 1040.30   82.29
  -9  -2   1 1116.39   59.79
  -9  -2   1 1049.59   74.99
  -9  -2   1 1020.70   59.69
  -9  -2   1 1156.88   76.49
   8   2  -1  687.03   67.89
   8   2  -1  723.43   54.99
  -8  -2   1  663.13   54.19
  -8  -2   1  521.45   41.40
  -8  -2   1  665.43   55.79
  -8  -2   1  603.14   41.40
   7   2  -1   32.20   24.70
   7   2  -1   19.50   18.20
  -7  -2   1   -1.00   11.00
  -7  -2   1   26.00   14.10
  -7  -2   1   30.40   19.40
  -7  -2   1   50.09   20.50
   6   2  -1  562.64   43.70
   6   2  -1  626.04   50.19
  -6  -2   1  523.75   34.80
  -6  -2   1  514.35   42.90
  -6  -2   1  555.74   36.00
  -6  -2   1  613.24   45.40
   5   2  -1  164.18   25.20
   5   2  -1  148.49   24.20
   5   2  -1  187.58   31.20
  -5  -2   1  244.18   29.90
  -5  -2   1  172.58   20.80
  -5  -2   1  211.48   21.40
  -5  -2   1  197.08   27.30
   4   2  -1 1335.97   66.09
   4   2  -1 1341.97   69.99
   4   2  -1 1304.87   65.49
   4   2  -1 1321.47   64.69
  -4  -2   1 1269.07   64.69
  -4  -2   1 1402.36   59.59
  -4  -2   1 1251.87   64.39
  -4  -2   1 1387.36   68.49
  -4  -2   1 1362.86   66.09
  -4  -2   1 1244.98   59.39
   3   2  -1  690.93   40.00
   3   2  -1  658.43   38.80
   3   2  -1  715.03   39.10
   3   2  -1  756.72   45.10
  -3  -2   1  751.32   42.70
  -3  -2   1  659.73   39.10
  -3  -2   1  683.93   38.60
  -3  -2   1  730.63   35.50
  -3  -2   1  802.12   40.10
  -3  -2   1  740.23   35.90
   2   2  -1 1428.56   62.49
   2   2  -1 1443.26   64.99
   2   2  -1 1423.56   60.09
   2   2  -1 1507.75   62.29
  -2  -2   1 1435.66   61.59
  -2  -2   1 1493.45   66.39
  -2  -2   1 1429.66   62.49
   1   2  -1   -3.90    3.00
   1   2  -1   -1.10    4.90
   1   2  -1    4.40    3.80
   1   2  -1    1.30    4.20
   1   2  -1   -0.90    3.30
  -1  -2   1   -4.70    3.00
  -1  -2   1    0.30    3.40
  -1  -2   1   -0.20    4.00
   0   2  -1   -1.10    2.70
   0   2  -1   -2.20    1.70
   0   2  -1    0.00    2.40
   0   2  -1   -0.10    2.30
   0  -2   1   -2.40    3.00
   0  -2   1    0.00    2.10
   0  -2   1    0.10    2.10
   0  -2   1    1.30    2.60
  -1   2  -1    1.60    2.80
  -1   2  -1   -3.80    2.70
  -1   2  -1    0.40    2.70
  -1   2  -1   -1.10    2.40
  -1   2  -1    4.30    2.70
   1  -2   1   -5.70    2.00
   1  -2   1    2.10    2.80
   1  -2   1   -1.80    2.70
   1  -2   1   -2.00    2.90
   1  -2   1   -3.70    2.40
  -2   2  -1    6.90    4.60
  -2   2  -1   45.80    8.70
  -2   2  -1   -0.50    5.00
   2  -2   1    3.00    4.70
   2  -2   1    0.60    4.80
   2  -2   1   71.99   11.70
   2  -2   1    0.10    4.40
  -3   2  -1  459.35   31.60
  -3   2  -1  549.74   31.20
  -3   2  -1  489.95   31.20
  -3   2  -1  488.55   27.00
  -3   2  -1  464.25   29.10
  -3   2  -1  505.75   28.70
   3  -2   1  518.75   32.10
   3  -2   1  494.25   31.50
   3  -2   1  483.55   28.90
   3  -2   1  473.55   30.50
  -4   2  -1 1255.97   59.99
  -4   2  -1 1249.68   58.89
  -4   2  -1 1262.67   57.89
  -4   2  -1 1151.28   62.49
  -4   2  -1 1275.77   63.09
  -4   2  -1 1248.48   64.89
   4  -2   1 1416.16   59.09
   4  -2   1 1324.77   64.19
   4  -2   1 1264.37   63.09
   4  -2   1 1365.86   62.29
   4  -2   1 1290.67   64.49
  -5   2  -1  427.56   32.60
  -5   2  -1  458.85   31.30
  -5   2  -1  397.56   35.20
  -5   2  -1  475.65   38.60
  -5   2  -1  436.06   36.60
   5  -2   1  434.36   36.90
   5  -2   1  505.75   30.90
   5  -2   1  440.66   35.00
   5  -2   1  479.45   37.70
   5  -2   1  459.65   36.90
  -6   2  -1 3479.75  156.28
  -6   2  -1 3477.55  154.28
  -6   2  -1 3504.05  150.08
  -6   2  -1 3471.55  143.99
   6  -2   1 3646.34  152.18
   6  -2   1 3476.85  153.58
   6  -2   1 3645.04  144.49
  -7   2  -1  786.82   57.19
  -7   2  -1  768.72   44.10
  -7   2  -1  685.43   53.99
   7  -2   1  779.82   53.39
   7  -2   1  819.52   44.40
   7  -2   1  760.92   54.29
  -8   2  -1  733.83   58.69
  -8   2  -1  838.42   47.10
  -8   2  -1  872.71   63.09
   8  -2   1  792.32   59.59
   8  -2   1  815.32   58.79
   8  -2   1  800.12   45.80
  -9   2  -1  332.17   31.80
  -9   2  -1  348.67   47.60
  -9   2  -1  240.78   42.70
   9  -2   1  415.66   51.49
   9  -2   1  350.86   32.20
   9  -2   1  282.97   41.70
 -10   2  -1  -30.40   22.10
 -10   2  -1   36.10   26.70
  10  -2   1   -6.40   23.90
  10  -2   1   16.90   28.20
  10  -2   1   43.80   16.50
 -11   2  -1   10.90   28.00
 -11   2  -1   39.50   29.60
  11  -2   1   20.80   16.60
  11  -2   1    0.00   29.50
  11  -2   1   48.60   32.50
 -12   2  -1   27.40   34.60
 -12   2  -1   25.70   30.00
  12  -2   1   40.50   35.90
  12  -2   1   35.60   31.80
 -13   2  -1  152.98   47.00
 -13   2  -1  178.98   50.59
  13  -2   1  119.59   45.80
  13  -2   1  180.88   48.10
 -14   2  -1  127.49   47.60
 -14   2  -1  191.78   52.79
  14  -2   1  117.89   53.89
  14  -2   1  131.19   51.49
 -15   2  -1   38.20   45.20
  15  -2   1  -43.80   44.70
  15  -2   1   46.20   43.40
  15   1  -1  -73.89   42.10
  15   1  -1  -33.00   39.00
  15   1  -1  -13.90   47.40
 -15  -1   1   20.90   48.70
  14   1  -1  148.99   56.59
  14   1  -1  248.58   51.89
  14   1  -1  196.88   64.59
 -14  -1   1  238.18   58.09
  13   1  -1  145.59   51.89
  13   1  -1  190.78   50.69
 -13  -1   1  204.78   49.80
  12   1  -1  189.08   44.60
  12   1  -1  140.69   48.60
 -12  -1   1  171.98   47.60
 -12  -1   1  171.48   29.20
 -12  -1   1  163.38   40.60
  11   1  -1  666.63   77.59
  11   1  -1  711.93   70.59
 -11  -1   1  649.83   50.09
 -11  -1   1  826.42   72.29
 -11  -1   1  879.21   81.79
  10   1  -1  -42.40   25.90
  10   1  -1   -5.50   21.20
 -10  -1   1    5.00   14.90
 -10  -1   1  -11.20   21.60
 -10  -1   1  -16.10   24.00
   9   1  -1  -27.40   23.30
   9   1  -1   -1.30   23.00
  -9  -1   1   32.70   25.30
  -9  -1   1  -26.10   18.10
  -9  -1   1   11.30   14.40
  -9  -1   1   -0.90   15.70
   8   1  -1   47.70   27.80
   8   1  -1   26.50   21.50
  -8  -1   1   59.69   24.10
  -8  -1   1   19.80   19.20
  -8  -1   1   11.90   14.00
  -8  -1   1   47.20   15.30
   7   1  -1  382.36   44.90
   7   1  -1  331.77   42.50
  -7  -1   1  330.37   33.00
  -7  -1   1  365.76   42.10
  -7  -1   1  308.97   40.00
   6   1  -1 2109.69  106.69
   6   1  -1 2213.28   94.19
   6   1  -1 2109.99  103.49
  -6  -1   1 2183.38  105.99
  -6  -1   1 2270.37   97.49
  -6  -1   1 2342.07  105.89
   5   1  -1  292.57   23.00
   5   1  -1  259.67   31.70
   5   1  -1  260.17   30.80
   5   1  -1  275.07   34.00
  -5  -1   1  288.47   31.50
  -5  -1   1  260.67   30.70
  -5  -1   1  304.87   27.30
  -5  -1   1  291.97   33.00
  -5  -1   1  289.17   29.60
   4   1  -1 4190.68  162.88
   4   1  -1 4134.29  168.68
   4   1  -1 4128.39  170.88
   4   1  -1 4048.70  169.38
   4   1  -1 4125.69  169.98
  -4  -1   1 4129.69  169.88
  -4  -1   1 4338.57  164.68
  -4  -1   1 4065.89  168.88
  -4  -1   1 4286.07  170.18
  -4  -1   1 4148.79  169.98
   3   1  -1 2159.48   86.19
   3   1  -1 2022.60   90.19
   3   1  -1 2073.59   89.89
   3   1  -1 2034.70   90.19
   3   1  -1 2095.89   91.89
  -3  -1   1 2159.18   90.49
  -3  -1   1 2151.68   86.89
  -3  -1   1 2179.88   91.49
  -3  -1   1 2113.59   90.69
  -3  -1   1 2201.48   90.99
   2   1  -1    1.90    5.40
   2   1  -1    0.90    4.70
   2   1  -1   -1.50    7.80
   2   1  -1    1.80    6.10
   2   1  -1    2.60    6.20
  -2  -1   1    7.20    8.60
  -2  -1   1   -3.80    8.70
  -2  -1   1    0.50    3.80
  -2  -1   1   -0.40    5.40
  -2  -1   1    0.50    5.00
  -2  -1   1   -2.90    4.30
   1   1  -1   -1.20    3.00
   1   1  -1   -1.10    2.00
   1   1  -1   -2.80    2.20
   1   1  -1    1.10    3.40
   1   1  -1    0.70    2.50
   1   1  -1    0.60    3.00
  -1  -1   1   -3.20    2.20
  -1  -1   1    0.30    3.00
  -1  -1   1   -2.90    3.60
  -1  -1   1   -1.30    3.30
  -1  -1   1   -4.50    1.90
  -1  -1   1   -2.70    2.00
   0   1  -1    0.90    0.60
   0   1  -1    1.20    1.00
   0   1  -1   -0.30    0.90
   0   1  -1   -0.40    0.80
   0   1  -1    0.40    0.90
   0  -1   1   -0.90    0.60
   0  -1   1    0.30    0.90
   0  -1   1   -0.20    1.10
   0  -1   1    0.30    1.30
   0  -1   1    0.20    0.60
  -1   1  -1   -1.00    1.90
  -1   1  -1    0.50    1.50
  -1   1  -1    0.50    1.80
  -1   1  -1    0.40    2.30
  -1   1  -1    0.60    1.80
   1  -1   1    0.60    2.60
   1  -1   1   -2.30    1.30
   1  -1   1    0.90    2.20
   1  -1   1    0.10    1.80
   1  -1   1    0.90    2.40
   1  -1   1   -0.70    2.20
   1  -1   1   -0.40    1.50
  -2   1  -1   29.90    7.40
  -2   1  -1   75.49   10.00
   2  -1   1   40.30    9.10
   2  -1   1  100.99   12.70
  -3   1  -1 3912.21  149.59
  -3   1  -1 3850.11  148.09
  -3   1  -1 3756.62  150.58
  -3   1  -1 3885.01  145.59
  -3   1  -1 3335.57  148.19
   3  -1   1 3701.23  149.19
   3  -1   1 3863.91  145.79
   3  -1   1 3843.52  143.49
   3  -1   1 3460.65  147.69
   3  -1   1 3565.14  148.69
   3  -1   1 3763.52  150.28
  -4   1  -1 2140.69   93.99
  -4   1  -1 2201.38   92.19
  -4   1  -1 2157.38   87.79
  -4   1  -1 2132.79   95.59
  -4   1  -1 2027.70   93.39
   4  -1   1 2041.00   94.49
   4  -1   1 2096.19   93.99
   4  -1   1 2133.59   92.99
   4  -1   1 2153.98   86.09
   4  -1   1 2014.90   93.09
   4  -1   1 2062.79   87.79
  -5   1  -1  589.24   40.30
  -5   1  -1  586.54   42.90
  -5   1  -1  671.23   43.60
  -5   1  -1  647.24   44.80
  -5   1  -1  570.34   35.10
   5  -1   1  664.73   43.80
   5  -1   1  627.34   44.00
   5  -1   1  620.94   36.00
   5  -1   1  636.54   43.30
   5  -1   1  662.83   34.30
   5  -1   1  655.53   43.60
  -6   1  -1  174.78   28.50
  -6   1  -1  168.98   20.50
  -6   1  -1  223.28   31.70
   6  -1   1  158.68   28.60
   6  -1   1  181.28   19.80
   6  -1   1  224.58   24.30
   6  -1   1  221.98   31.80
  -7   1  -1  -12.30   14.60
  -7   1  -1   -8.30   10.60
  -7   1  -1  -21.70   14.40
   7  -1   1   -6.80    9.60
   7  -1   1    5.50   11.40
   7  -1   1   -2.50   18.30
   7  -1   1    0.30   16.40
  -8   1  -1  109.19   27.80
  -8   1  -1  105.99   18.80
  -8   1  -1   91.99   27.20
   8  -1   1  143.69   32.10
   8  -1   1   97.29   17.00
   8  -1   1  117.99   31.00
  -9   1  -1 1000.90   72.09
  -9   1  -1  945.81   69.79
   9  -1   1  930.31   70.29
   9  -1   1 1011.80   71.49
   9  -1   1  955.60   50.09
 -10   1  -1   93.29   36.30
 -10   1  -1   40.80   25.90
  10  -1   1  110.99   36.20
  10  -1   1   67.09   30.40
  10  -1   1   52.49   16.10
 -11   1  -1 2492.85  136.29
 -11   1  -1 2429.66  137.29
  11  -1   1 2373.06  131.99
  11  -1   1 2423.26  135.39
 -12   1  -1   98.49   38.10
 -12   1  -1  194.28   47.70
 -12   1  -1  161.58   26.30
  12  -1   1  211.58   45.00
  12  -1   1  217.48   50.29
 -13   1  -1  -13.80   28.50
 -13   1  -1  -37.50   31.80
  13  -1   1  -62.09   32.60
  13  -1   1  -17.80   31.90
 -14   1  -1  -37.40   34.80
  14  -1   1   37.90   39.80
  14  -1   1  -70.89   37.90
 -15   1  -1   13.80   46.20
  15  -1   1   30.20   43.90
  15  -1   1  -50.49   47.90
  15   0  -1   64.69   51.99
  15   0  -1  -14.50   38.10
  15   0  -1  -22.50   42.00
 -15   0   1  -16.80   43.10
  14   0  -1  -19.30   32.50
  14   0  -1  -13.30   39.90
 -14   0   1   -7.90   38.20
  13   0  -1    0.20   31.50
  13   0  -1  -16.50   36.90
 -13   0   1   10.50   31.60
 -13   0   1    1.90   33.80
  12   0  -1  130.29   44.00
  12   0  -1   31.30   38.70
 -12   0   1  151.48   44.50
 -12   0   1  130.39   26.80
 -12   0   1   96.69   37.30
  11   0  -1 1766.22  108.59
  11   0  -1 1668.43  111.39
 -11   0   1 1693.53  108.09
 -11   0   1 1808.22   89.29
 -11   0   1 1846.92  111.69
  10   0  -1    1.00   27.30
  10   0  -1   24.50   25.70
 -10   0   1   13.00   27.80
 -10   0   1   39.30   17.30
 -10   0   1   -2.40   23.30
   9   0  -1 1547.95   74.79
   9   0  -1 1593.34   93.89
   9   0  -1 1489.55   89.59
  -9   0   1 1560.54   91.69
  -9   0   1 1562.74   93.79
  -9   0   1 1538.95   78.79
   8   0  -1  272.67   39.30
   8   0  -1  321.37   44.90
   8   0  -1  220.58   26.10
  -8   0   1  266.37   37.20
  -8   0   1  310.67   32.60
  -8   0   1  313.07   41.60
   7   0  -1  508.15   50.49
   7   0  -1  468.45   46.60
   7   0  -1  392.96   30.70
  -7   0   1  397.06   44.00
  -7   0   1  389.46   33.00
  -7   0   1  481.05   48.90
   6   0  -1  298.67   37.10
   6   0  -1  353.16   27.90
   6   0  -1  393.36   39.80
  -6   0   1  368.96   38.60
  -6   0   1  327.47   35.10
  -6   0   1  337.67   28.60
   5   0  -1  431.76   40.20
   5   0  -1  372.96   35.90
   5   0  -1  277.17   31.70
   5   0  -1  375.16   36.20
   5   0  -1  359.56   26.90
  -5   0   1  370.76   36.00
  -5   0   1  304.27   31.70
  -5   0   1  371.56   37.00
  -5   0   1  321.87   30.00
  -5   0   1  386.46   37.90
   4   0  -1  513.35   36.00
   4   0  -1  554.94   36.80
   4   0  -1  579.74   32.40
   4   0  -1  583.64   37.60
   4   0  -1  591.14   37.30
  -4   0   1  581.24   38.30
  -4   0   1  590.34   37.20
  -4   0   1  526.75   34.70
  -4   0   1  575.94   32.80
  -4   0   1  512.35   35.90
   3   0  -1 4041.40  156.58
   3   0  -1 3767.82  155.28
   3   0  -1 3791.12  155.78
   3   0  -1 4124.29  152.98
   3   0  -1 3839.02  155.08
  -3   0   1 4062.39  153.58
  -3   0   1 3819.52  156.48
  -3   0   1 3914.11  154.68
  -3   0   1 3909.91  155.98
  -3   0   1 3816.12  155.58
   2   0  -1    9.20    4.40
   2   0  -1    2.30    5.20
   2   0  -1   19.50    7.40
   2   0  -1    3.60    4.60
   2   0  -1    3.00    4.50
  -2   0   1    0.10    4.80
  -2   0   1   57.39    9.60
  -2   0   1    0.30    4.50
  -2   0   1   65.49   10.50
  -2   0   1   -3.90    3.70
   1   0  -1    0.20    1.40
   1   0  -1    0.20    1.50
   1   0  -1    0.40    2.00
   1   0  -1    2.00    2.00
   1   0  -1    2.30    2.20
  -1   0   1    0.20    2.00
  -1   0   1   -0.30    1.40
  -1   0   1   -2.10    1.70
  -1   0   1   -1.20    1.90
  -1   0   1   -0.80    2.10
   0   0  -1   -0.60    0.40
   0   0  -1    0.30    0.40
   0   0  -1    0.10    0.40
   0   0  -1   -0.20    0.30
   0   0  -1    0.20    0.40
   0   0  -1   -0.10    0.40
   0   0   1    0.60    0.70
   0   0   1   -0.20    0.40
   0   0   1    0.20    0.60
   0   0   1    0.40    0.60
   0   0   1    0.20    0.60
   0   0   1    0.10    0.40
  -1   0  -1   -0.30    2.60
  -1   0  -1   -0.80    1.60
  -1   0  -1    1.30    2.40
  -1   0  -1   -1.30    1.80
  -1   0  -1    0.20    2.30
   1   0   1    2.10    2.40
   1   0   1    4.20    2.40
   1   0   1    0.70    2.50
   1   0   1    0.60    1.80
   1   0   1    0.70    2.20
  -2   0  -1   81.49   12.10
  -2   0  -1  114.39   14.30
   2   0   1  177.28   17.10
   2   0   1   69.19   11.50
  -3   0  -1   48.10   12.60
  -3   0  -1   29.90   11.70
  -3   0  -1   48.90    7.90
  -3   0  -1   54.59   13.80
  -3   0  -1   79.39   11.90
  -3   0  -1   41.80   11.80
   3   0   1   54.19    7.90
   3   0   1   52.69   13.80
   3   0   1   63.79   13.30
   3   0   1   47.70   13.20
   3   0   1   38.50   10.00
   3   0   1   49.00   12.90
  -4   0  -1 1412.76   60.79
  -4   0  -1 1464.95   68.89
  -4   0  -1 1368.86   58.39
  -4   0  -1 1420.06   67.89
  -4   0  -1 1371.76   67.29
  -4   0  -1 1434.26   69.09
   4   0   1 1311.47   66.69
   4   0   1 1327.47   68.09
   4   0   1 1302.67   60.69
   4   0   1 1377.66   68.39
   4   0   1 1461.45   57.69
   4   0   1 1434.86   68.49
  -5   0  -1  269.37   22.30
  -5   0  -1  190.68   25.80
  -5   0  -1  262.07   31.30
  -5   0  -1  249.68   20.10
  -5   0  -1  222.88   32.50
  -5   0  -1  249.08   31.30
   5   0   1  248.48   31.00
   5   0   1  278.57   22.90
   5   0   1  208.98   26.50
   5   0   1  264.87   18.90
   5   0   1  265.27   35.60
   5   0   1  282.07   32.20
  -6   0  -1 3646.94  157.18
  -6   0  -1 3721.73  144.29
  -6   0  -1 3651.13  145.19
  -6   0  -1 3695.13  159.58
   6   0   1 3567.74  158.08
   6   0   1 3587.84  142.19
   6   0   1 3646.44  156.88
   6   0   1 3430.66  145.59
  -7   0  -1   99.69   25.90
  -7   0  -1   92.49   16.90
  -7   0  -1   88.89   23.70
   7   0   1   80.09   26.20
   7   0   1   98.89   26.60
   7   0   1  105.29   18.30
   7   0   1  134.39   16.30
  -8   0  -1  786.02   43.70
  -8   0  -1  768.82   59.09
  -8   0  -1  762.42   59.69
   8   0   1  889.51   64.09
   8   0   1  768.82   58.79
  -9   0  -1  136.39   31.30
  -9   0  -1  140.39   32.50
  -9   0  -1  126.59   19.90
   9   0   1  111.79   29.50
   9   0   1   90.89   34.10
 -10   0  -1   11.00   27.50
 -10   0  -1    2.00   23.10
 -10   0  -1   25.70   14.90
  10   0   1   12.10   27.90
  10   0   1   -3.20   26.60
 -11   0  -1   66.19   31.40
 -11   0  -1    7.60   15.50
 -11   0  -1   54.19   34.80
  11   0   1   37.30   33.50
  11   0   1   25.70   28.30
 -12   0  -1   15.70   29.20
 -12   0  -1    2.40   32.50
  12   0   1   81.59   38.70
  12   0   1  -25.00   30.50
 -13   0  -1  289.27   62.19
  13   0   1  127.19   52.09
  13   0   1  246.08   52.59
 -14   0  -1  135.29   50.39
  14   0   1   75.29   44.20
  14   0   1  102.69   54.29
 -15   0  -1   83.39   53.29
 -15   0  -1   48.00   49.60
  15   0   1   48.90   42.40
  15   0   1  146.89   61.09
  15  -1  -1   33.80   49.80
  15  -1  -1    1.50   35.90
 -15   1   1   83.29   50.59
 -15   1   1  -32.20   31.40
  14  -1  -1  320.07   57.29
  14  -1  -1  165.38   53.89
 -14   1   1  233.78   55.19
 -14   1   1  158.08   46.10
  13  -1  -1   79.29   43.80
  13  -1  -1   94.59   37.90
 -13   1   1   65.59   36.30
 -13   1   1  128.89   42.90
 -13   1   1   74.29   24.90
  12  -1  -1  268.57   54.89
  12  -1  -1  254.37   49.30
 -12   1   1  335.47   55.19
 -12   1   1  270.07   50.59
 -12   1   1  217.68   32.90
  11  -1  -1  589.94   41.70
  11  -1  -1  548.45   65.59
  11  -1  -1  474.65   63.09
 -11   1   1  430.96   57.89
 -11   1   1  452.25   62.89
  10  -1  -1   24.50   15.60
  10  -1  -1   -7.40   23.20
  10  -1  -1   -0.20   24.60
 -10   1   1   49.40   27.30
 -10   1   1  -11.30   24.30
   9  -1  -1   13.00   14.10
   9  -1  -1   18.00   20.90
   9  -1  -1   28.10   22.80
  -9   1   1   25.40   21.80
  -9   1   1   -1.50   20.50
   8  -1  -1  223.88   27.30
   8  -1  -1  165.98   34.40
   8  -1  -1  191.88   33.70
  -8   1   1  149.09   30.80
  -8   1   1  199.28   27.20
  -8   1   1  127.79   30.60
   7  -1  -1  552.64   37.10
   7  -1  -1  481.55   44.30
   7  -1  -1  598.94   46.20
  -7   1   1  505.15   45.00
  -7   1   1  440.26   46.10
  -7   1   1  533.85   38.00
   6  -1  -1 3913.81  160.98
   6  -1  -1 3860.61  168.28
   6  -1  -1 3940.81  166.88
  -6   1   1 3942.21  165.68
  -6   1   1 3966.80  171.68
  -6   1   1 4069.89  163.08
  -6   1   1 3968.40  169.38
   5  -1  -1  183.58   23.90
   5  -1  -1  202.78   26.80
   5  -1  -1  157.28   20.70
   5  -1  -1  179.08   25.70
   5  -1  -1  157.58   25.40
  -5   1   1  153.38   26.10
  -5   1   1  172.58   22.30
  -5   1   1  151.28   24.40
  -5   1   1  109.59   22.90
  -5   1   1  160.18   22.40
   4  -1  -1 3721.83  149.69
   4  -1  -1 3641.04  145.79
   4  -1  -1 3605.94  150.08
   4  -1  -1 3609.34  148.99
   4  -1  -1 3645.44  146.49
  -4   1   1 3615.14  145.79
  -4   1   1 3592.44  145.99
  -4   1   1 3555.44  149.29
  -4   1   1 3663.63  149.59
  -4   1   1 3633.34  150.98
   3  -1  -1   37.70   12.10
   3  -1  -1   39.60   10.90
   3  -1  -1   49.40   11.90
   3  -1  -1   63.09   13.10
   3  -1  -1   33.00   10.70
  -3   1   1   29.10    9.80
  -3   1   1   45.80   12.90
  -3   1   1   35.50   12.40
  -3   1   1   45.40   12.50
  -3   1   1   44.50   11.60
   2  -1  -1   -4.60    4.90
   2  -1  -1   15.00    6.20
   2  -1  -1    2.80    3.60
   2  -1  -1    8.70    6.00
   2  -1  -1   -6.70    3.50
  -2   1   1   -1.10    4.40
  -2   1   1   -1.00    5.20
  -2   1   1   -4.80    4.20
  -2   1   1   60.99    9.00
   1  -1  -1   -8.60    2.20
   1  -1  -1   -7.60    1.90
   1  -1  -1   -5.20    1.60
   1  -1  -1   -6.60    2.30
   1  -1  -1   -4.10    2.20
  -1   1   1   -7.20    1.90
  -1   1   1   -6.60    2.30
  -1   1   1   -6.00    2.20
  -1   1   1   -7.90    2.30
  -1   1   1   -6.10    1.80
   0  -1  -1   -0.10    1.40
   0  -1  -1    0.00    0.70
   0  -1  -1    1.80    1.40
   0  -1  -1   -0.30    1.00
   0  -1  -1   -0.60    1.00
   0  -1  -1    0.10    0.70
   0   1   1    0.10    1.60
   0   1   1   -0.20    1.20
   0   1   1    0.90    1.50
   0   1   1    0.70    1.00
   0   1   1   -1.50    1.30
   0   1   1   -0.90    1.10
  -1  -1  -1   -2.70    2.40
  -1  -1  -1   -1.30    3.00
  -1  -1  -1   -3.30    2.40
  -1  -1  -1   -1.90    1.50
  -1  -1  -1   -6.40    2.90
   1   1   1    1.10    1.70
   1   1   1   -1.60    2.80
   1   1   1    0.30    3.20
   1   1   1    1.50    3.80
   1   1   1   -0.60    2.50
   1   1   1    2.90    3.00
  -2  -1  -1    0.70    5.20
  -2  -1  -1   19.50    8.60
  -2  -1  -1   39.60    8.50
  -2  -1  -1   18.10   10.00
   2   1   1   -1.10    5.90
   2   1   1   20.60    9.60
   2   1   1   39.50   10.40
   2   1   1   19.80    7.50
   2   1   1   -8.00    5.20
  -3  -1  -1  508.75   23.30
  -3  -1  -1  475.95   31.90
  -3  -1  -1  470.75   31.00
  -3  -1  -1  459.15   31.90
  -3  -1  -1  457.45   31.10
  -3  -1  -1  489.75   23.60
  -3  -1  -1  517.65   26.80
   3   1   1  483.85   26.70
   3   1   1  535.25   31.90
   3   1   1  476.05   31.20
   3   1   1  510.95   33.90
   3   1   1  493.65   31.80
  -4  -1  -1 3609.44  152.58
  -4  -1  -1 3729.23  145.09
  -4  -1  -1 3694.43  142.89
  -4  -1  -1 3637.54  153.58
  -4  -1  -1 3572.74  154.08
  -4  -1  -1 3702.13  153.48
  -4  -1  -1 3779.02  143.29
   4   1   1 3687.43  154.08
   4   1   1 3658.13  145.99
   4   1   1 3799.92  154.18
   4   1   1 3909.01  153.48
   4   1   1 3676.93  155.18
  -5  -1  -1  329.17   22.90
  -5  -1  -1  363.96   35.20
  -5  -1  -1  364.16   23.30
  -5  -1  -1  326.57   33.10
  -5  -1  -1  379.16   25.50
   5   1   1  300.17   32.70
   5   1   1  333.67   25.80
   5   1   1  402.66   34.40
   5   1   1  394.86   40.20
  -6  -1  -1   15.00   15.60
  -6  -1  -1   14.10    9.70
  -6  -1  -1   19.90    9.90
  -6  -1  -1   16.30   16.80
   6   1   1  -14.60   17.00
   6   1   1    9.40   17.20
   6   1   1   12.30   11.40
  -7  -1  -1   47.20   12.50
  -7  -1  -1   86.39   23.40
  -7  -1  -1   95.29   24.50
  -7  -1  -1   76.19   14.50
   7   1   1   27.70   21.30
   7   1   1   63.29   15.80
   7   1   1   44.00   24.40
  -8  -1  -1  106.79   28.30
  -8  -1  -1   78.19   14.70
  -8  -1  -1   78.29   26.50
  -8  -1  -1  116.69   18.20
   8   1   1   87.59   29.40
   8   1   1   75.09   26.60
  -9  -1  -1  598.94   62.19
  -9  -1  -1  615.84   40.10
  -9  -1  -1  699.33   67.09
   9   1   1  731.73   60.69
   9   1   1  699.73   71.39
 -10  -1  -1  323.37   31.80
 -10  -1  -1  431.46   59.39
 -10  -1  -1  336.17   50.29
  10   1   1  361.56   51.19
  10   1   1  372.36   56.89
 -11  -1  -1 1632.84  105.29
 -11  -1  -1 1701.33   81.09
  11   1   1 1556.64  109.39
  11   1   1 1664.53  103.89
 -12  -1  -1  -28.20   32.80
  12   1   1   60.79   38.10
  12   1   1   13.50   43.20
 -13  -1  -1  109.39   46.40
  13   1   1   68.79   41.10
  13   1   1   37.10   48.60
 -14  -1  -1  -13.00   40.30
 -14  -1  -1  -14.80   41.00
  14   1   1   -9.80   36.60
  14   1   1    4.90   47.50
 -15  -1  -1   58.99   47.90
 -15  -1  -1   46.00   51.79
  15   1   1   33.80   46.50
  15   1   1  -43.60   50.39
  16  -2  -1  446.36   71.39
  16  -2  -1  514.95   84.59
 -16   2   1  485.55   82.19
  15  -2  -1   -6.60   37.40
  15  -2  -1  -26.10   42.20
 -15   2   1  -11.10   33.50
 -15   2   1   13.80   38.10
  14  -2  -1    1.60   32.40
  14  -2  -1  -26.70   36.50
 -14   2   1  -36.10   28.30
 -14   2   1  -37.80   32.70
  13  -2  -1   -8.90   35.40
  13  -2  -1   81.59   41.10
 -13   2   1   12.90   36.60
 -13   2   1   62.09   34.80
  12  -2  -1  453.65   58.49
  12  -2  -1  390.66   44.10
  12  -2  -1  355.76   58.99
 -12   2   1  443.76   59.49
 -12   2   1  335.37   54.39
  11  -2  -1 1106.99   83.09
  11  -2  -1 1009.10   62.59
  11  -2  -1 1090.59   80.69
 -11   2   1 1130.09   84.19
 -11   2   1 1113.09   84.89
  10  -2  -1  207.78   41.20
  10  -2  -1  158.18   27.00
  10  -2  -1   98.49   31.70
 -10   2   1  116.79   35.00
 -10   2   1  197.28   37.90
   9  -2  -1 1452.55   86.29
   9  -2  -1 1283.07   81.09
   9  -2  -1 1462.05   73.89
  -9   2   1 1352.96   84.99
  -9   2   1 1307.67   86.19
   8  -2  -1  104.49   27.10
   8  -2  -1   36.30   16.60
   8  -2  -1   43.20   21.40
  -8   2   1   71.29   23.40
  -8   2   1   54.79   23.20
   7  -2  -1  206.38   31.30
   7  -2  -1  307.87   32.40
   7  -2  -1  347.57   38.90
  -7   2   1  302.07   38.60
  -7   2   1  379.46   46.00
   6  -2  -1  132.69   23.80
   6  -2  -1  181.38   26.10
   6  -2  -1   99.59   20.40
  -6   2   1  127.39   26.30
  -6   2   1  110.59   24.50
  -6   2   1   97.49   19.50
  -6   2   1   83.99   18.60
   5  -2  -1  186.88   24.40
   5  -2  -1  187.38   25.10
   5  -2  -1  181.48   26.50
   5  -2  -1  173.48   25.30
   5  -2  -1  153.08   24.40
  -5   2   1  182.18   23.00
  -5   2   1  170.48   25.50
  -5   2   1  175.98   23.80
  -5   2   1  135.19   24.50
  -5   2   1  156.98   18.30
  -5   2   1  133.39   19.50
   4  -2  -1 3523.05  145.89
   4  -2  -1 3514.75  145.49
   4  -2  -1 3547.15  140.79
   4  -2  -1 3456.55  146.39
   4  -2  -1 3676.83  144.49
  -4   2   1 3332.87  144.39
  -4   2   1 3698.03  143.99
  -4   2   1 3438.86  145.59
  -4   2   1 3532.05  147.69
  -4   2   1 3540.75  140.19
   3  -2  -1  696.93   34.60
   3  -2  -1  803.02   40.40
   3  -2  -1  742.93   40.20
   3  -2  -1  711.73   39.10
   3  -2  -1  700.53   39.00
  -3   2   1  689.43   38.50
  -3   2   1  742.73   40.10
  -3   2   1  783.32   34.40
  -3   2   1  710.13   40.90
  -3   2   1  800.22   39.80
   1  -2  -1    0.90    3.30
   1  -2  -1    5.80    4.00
   1  -2  -1    0.10    3.20
   1  -2  -1   -1.60    2.30
   1  -2  -1    1.90    2.80
  -1   2   1    3.60    3.40
  -1   2   1   -2.10    3.00
  -1   2   1   -3.20    2.60
  -1   2   1   -1.50    2.80
  -1   2   1   -2.30    2.70
   0  -2  -1   -3.40    2.10
   0  -2  -1    1.40    2.70
   0  -2  -1    0.20    2.50
   0  -2  -1    0.30    2.60
   0  -2  -1   -5.30    2.60
   0  -2  -1   -0.20    3.00
   0   2   1    1.00    2.90
   0   2   1    2.10    2.50
   0   2   1    0.50    3.10
   0   2   1   -1.10    2.60
  -1  -2  -1    3.60    3.70
  -1  -2  -1   -0.20    3.60
  -1  -2  -1    2.20    6.10
  -1  -2  -1    0.00    3.10
  -1  -2  -1    1.80    4.20
   1   2   1   34.70    6.40
   1   2   1   -1.40    3.50
   1   2   1  -11.00    3.90
   1   2   1    0.10    3.60
   1   2   1   21.00    7.20
  -2  -2  -1  232.68   20.60
  -2  -2  -1  374.76   22.20
  -2  -2  -1  298.67   17.30
  -2  -2  -1  385.56   23.80
  -2  -2  -1  364.66   26.20
   2   2   1  357.96   17.70
   2   2   1  355.76   23.40
   2   2   1  323.07   22.50
   2   2   1  339.47   27.00
  -3  -2  -1 1146.19   59.09
  -3  -2  -1 1154.58   56.29
  -3  -2  -1 1123.89   55.19
  -3  -2  -1 1142.69   48.50
   3   2   1 1151.98   51.49
   3   2   1 1251.67   61.19
   3   2   1 1158.18   55.59
   3   2   1 1133.29   56.29
   3   2   1 1160.08   56.49
  -4  -2  -1 1063.79   46.40
  -4  -2  -1 1075.19   55.79
  -4  -2  -1  972.00   57.79
  -4  -2  -1 1031.70   45.80
  -4  -2  -1 1165.48   58.09
   4   2   1 1036.20   49.30
   4   2   1 1031.30   56.19
   4   2   1 1070.59   60.69
   4   2   1 1108.29   55.99
   4   2   1 1001.80   55.99
  -5  -2  -1  224.08   29.30
  -5  -2  -1  264.17   19.90
  -5  -2  -1  277.57   20.50
   5   2   1  210.08   33.50
   5   2   1  240.78   23.10
   5   2   1  268.57   31.90
  -6  -2  -1 3002.60  124.09
  -6  -2  -1 3134.79  137.89
  -6  -2  -1 3010.20  124.09
   6   2   1 3238.18  138.39
   6   2   1 3073.59  127.09
   6   2   1 3095.39  143.79
  -7  -2  -1   38.70   12.20
  -7  -2  -1   26.70   12.00
  -7  -2  -1   30.70   21.50
   7   2   1   28.50   24.70
   7   2   1   41.10   21.70
   7   2   1   45.40   14.60
  -8  -2  -1  497.75   33.60
  -8  -2  -1  561.24   35.70
  -8  -2  -1  637.44   54.29
   8   2   1  610.34   62.39
   8   2   1  518.95   50.59
  -9  -2  -1  715.83   65.69
  -9  -2  -1  693.73   42.80
   9   2   1  675.13   60.19
   9   2   1  697.53   74.59
 -10  -2  -1   41.90   30.10
 -10  -2  -1    1.30   13.80
  10   2   1   -8.20   25.40
  10   2   1   11.70   34.30
 -11  -2  -1  279.67   30.10
 -11  -2  -1  306.87   55.09
  11   2   1  265.97   58.29
  11   2   1  303.07   51.89
 -12  -2  -1   -2.70   34.30
 -12  -2  -1    1.80   36.50
  12   2   1   35.80   31.30
  12   2   1  -39.20   36.70
 -13  -2  -1  303.17   59.19
 -13  -2  -1  316.47   60.79
  13   2   1  282.47   65.29
  13   2   1  388.96   60.39
 -14  -2  -1  203.18   59.19
 -14  -2  -1  122.79   50.79
  14   2   1   28.80   55.29
  14   2   1  135.99   47.60
 -15  -2  -1  264.37   70.59
 -15  -2  -1   34.80   45.10
  15   2   1   50.29   55.19
  15   2   1  124.59   58.69
  15   2   1  210.48   71.59
  16  -3  -1  236.68   59.49
 -16   3   1  194.48   57.19
 -16   3   1  362.86   71.69
  15  -3  -1   46.00   42.30
  15  -3  -1   29.80   46.30
 -15   3   1  119.39   46.00
 -15   3   1  108.29   50.89
  14  -3  -1  227.48   56.09
  14  -3  -1  246.48   52.89
 -14   3   1  357.86   66.09
 -14   3   1  344.27   60.89
  13  -3  -1   79.89   40.30
  13  -3  -1   79.59   37.20
 -13   3   1  111.39   42.00
 -13   3   1  271.67   53.69
  12  -3  -1  537.65   64.49
  12  -3  -1  542.85   50.19
  12  -3  -1  557.74   66.79
 -12   3   1  563.04   67.39
 -12   3   1  510.65   67.79
  11  -3  -1  339.87   40.00
  11  -3  -1  382.96   51.09
  11  -3  -1  297.77   51.69
 -11   3   1  305.97   50.69
 -11   3   1  343.47   54.79
  10  -3  -1   40.30   27.80
  10  -3  -1   11.80   24.60
  10  -3  -1   76.19   23.90
 -10   3   1   14.10   23.20
 -10   3   1   45.10   28.30
   9  -3  -1  335.47   44.10
   9  -3  -1  351.06   38.70
   9  -3  -1  403.76   45.60
  -9   3   1  290.07   45.50
  -9   3   1  327.87   46.70
   8  -3  -1  -12.00   16.40
   8  -3  -1   27.70   19.10
   8  -3  -1  -23.70   13.00
  -8   3   1    2.60   17.70
  -8   3   1    8.10   20.00
   7  -3  -1  994.40   56.89
   7  -3  -1  985.30   57.49
   7  -3  -1  946.51   61.79
  -7   3   1 1025.00   63.69
  -7   3   1  969.50   50.09
  -7   3   1  939.61   53.79
  -7   3   1  875.21   63.19
   6  -3  -1 3714.13  160.58
   6  -3  -1 3924.71  157.28
   6  -3  -1 3720.33  153.48
  -6   3   1 3427.16  159.18
  -6   3   1 3612.64  151.68
  -6   3   1 3816.52  163.98
  -6   3   1 3708.63  149.59
   5  -3  -1  466.65   37.10
   5  -3  -1  490.65   38.40
   5  -3  -1  439.56   37.10
   5  -3  -1  489.75   32.60
   5  -3  -1  540.85   37.20
  -5   3   1  443.06   34.90
  -5   3   1  552.84   39.30
  -5   3   1  518.65   40.40
  -5   3   1  516.25   31.20
   4  -3  -1 1240.78   61.59
   4  -3  -1 1296.87   63.19
   4  -3  -1 1338.07   63.09
   4  -3  -1 1226.08   62.79
   4  -3  -1 1331.57   56.39
  -4   3   1 1152.88   60.39
  -4   3   1 1292.87   65.09
  -4   3   1 1217.68   62.89
  -4   3   1 1242.88   54.99
   3  -3  -1 1437.96   62.89
   3  -3  -1 1422.76   61.89
   3  -3  -1 1371.06   63.99
   3  -3  -1 1306.27   62.49
  -3   3   1 1286.37   62.09
  -3   3   1 1349.07   62.09
  -3   3   1 1316.07   60.99
  -3   3   1 1352.86   59.79
  -3   3   1 1266.97   63.39
   2  -3  -1   29.90    8.90
   2  -3  -1   31.40    9.20
   2  -3  -1   57.99   10.40
   2  -3  -1    0.90    6.60
  -2   3   1    7.00    6.00
  -2   3   1   35.40    8.40
  -2   3   1   38.30   11.00
  -2   3   1   50.99    9.90
   0  -3  -1   24.90    6.80
   0  -3  -1    3.60    4.20
   0  -3  -1    0.50    5.10
   0  -3  -1    2.00    3.90
   0   3   1   -0.20    5.50
  -1  -3  -1 5429.16  203.98
  -1  -3  -1 5330.97  207.98
  -1  -3  -1 5398.16  201.98
   1   3   1 5249.87  203.78
   1   3   1 5218.28  202.48
   1   3   1 5395.06  202.68
  -2  -3  -1 1288.87   62.39
  -2  -3  -1 1195.48   56.09
  -2  -3  -1 1295.47   53.59
  -2  -3  -1 1219.18   57.09
  -2  -3  -1 1318.27   55.49
   2   3   1 1271.37   62.79
   2   3   1 1306.97   52.99
   2   3   1 1243.48   56.59
   2   3   1 1188.38   56.69
  -3  -3  -1 1450.35   60.39
  -3  -3  -1 1380.16   65.79
  -3  -3  -1 1404.16   64.39
  -3  -3  -1 1496.35   71.89
   3   3   1 1363.56   67.19
   3   3   1 1488.05   73.19
   3   3   1 1329.97   66.19
   3   3   1 1464.75   66.59
   3   3   1 1504.55   60.29
  -4  -3  -1 2741.53  118.49
  -4  -3  -1 2765.92  109.19
  -4  -3  -1 2820.72  117.29
  -4  -3  -1 2836.22  110.19
   4   3   1 2718.63  118.39
   4   3   1 2780.12  125.79
   4   3   1 2673.13  119.69
   4   3   1 2723.23  112.59
   4   3   1 2736.13  119.99
  -5  -3  -1  627.04   32.40
  -5  -3  -1  595.54   43.10
  -5  -3  -1  596.04   32.90
   5   3   1  559.54   35.10
   5   3   1  607.84   51.09
   5   3   1  655.93   44.80
  -6  -3  -1   27.70   17.60
  -6  -3  -1   -5.60    9.40
  -6  -3  -1   22.80   10.70
   6   3   1   -6.10   10.30
   6   3   1   16.40   21.70
   6   3   1    3.20   16.70
  -7  -3  -1   28.10   11.40
  -7  -3  -1   21.20   11.40
  -7  -3  -1   30.80   21.40
   7   3   1   -4.40   19.50
   7   3   1   12.00   24.60
  -8  -3  -1  554.44   36.10
  -8  -3  -1  612.54   38.10
  -8  -3  -1  628.74   56.79
   8   3   1  670.23   63.19
   8   3   1  670.33   69.99
  -9  -3  -1  297.57   29.00
  -9  -3  -1  276.27   44.30
   9   3   1  314.57   55.49
   9   3   1  291.77   46.90
 -10  -3  -1  794.72   77.99
 -10  -3  -1  810.42   74.39
 -10  -3  -1  672.63   45.10
  10   3   1  616.84   77.69
  10   3   1  786.72   68.39
 -11  -3  -1  927.31   79.29
 -11  -3  -1  927.81   80.29
 -11  -3  -1  894.91   71.19
  11   3   1  758.82   92.69
  11   3   1  955.00   79.39
 -12  -3  -1    5.20   33.30
 -12  -3  -1  -51.39   32.80
  12   3   1   14.40   34.70
  12   3   1   22.30   43.30
 -13  -3  -1   15.70   37.40
 -13  -3  -1  106.29   52.29
  13   3   1   90.29   57.49
  13   3   1   99.09   45.60
 -14  -3  -1   46.10   44.20
 -14  -3  -1  -10.20   46.10
  14   3   1  115.99   50.29
  14   3   1    2.80   52.89
  14   3   1   -4.90   52.19
  16  -4  -1  258.97   66.99
 -16   4   1  196.18   66.79
 -16   4   1  236.18   61.49
  15  -4  -1   15.80   41.80
  15  -4  -1   -1.50   37.90
 -15   4   1   42.20   40.30
 -15   4   1   -6.20   43.10
  14  -4  -1   53.99   38.30
  14  -4  -1  -29.80   32.90
 -14   4   1   18.40   31.60
 -14   4   1   22.30   35.70
  13  -4  -1  -18.70   28.70
  13  -4  -1   51.09   32.00
 -13   4   1  -29.70   27.60
 -13   4   1   -7.90   30.00
  12  -4  -1  602.64   72.69
  12  -4  -1  619.04   68.59
  12  -4  -1  610.14   55.79
 -12   4   1  563.24   69.69
 -12   4   1  457.25   65.89
  11  -4  -1  666.63   66.19
  11  -4  -1  625.84   71.49
  11  -4  -1  679.33   53.19
 -11   4   1  787.22   80.49
 -11   4   1  638.84   70.69
  10  -4  -1   38.90   24.50
  10  -4  -1   69.49   23.70
  10  -4  -1    1.90   21.20
 -10   4   1   78.09   29.30
 -10   4   1   44.00   28.60
   9  -4  -1 1144.89   78.79
   9  -4  -1 1212.08   72.29
   9  -4  -1 1301.07   73.39
  -9   4   1 1232.78   63.39
  -9   4   1 1262.37   81.49
  -9   4   1 1242.78   83.19
   8  -4  -1  317.57   38.30
   8  -4  -1  268.87   35.70
   8  -4  -1  296.57   40.90
  -8   4   1  309.47   44.60
  -8   4   1  285.77   42.20
  -8   4   1  315.97   31.60
   7  -4  -1   48.80   17.70
   7  -4  -1   31.10   18.90
   7  -4  -1   35.10   19.70
  -7   4   1   23.00   19.10
  -7   4   1   47.00   15.40
  -7   4   1   29.60   20.10
  -7   4   1   50.29   14.90
   6  -4  -1   72.19   17.90
   6  -4  -1   84.29   22.40
   6  -4  -1   74.19   20.10
  -6   4   1   55.29   21.90
  -6   4   1   67.59   14.90
  -6   4   1   43.40   16.60
  -6   4   1   79.79   22.00
   5  -4  -1  212.48   27.50
   5  -4  -1  191.38   26.20
   5  -4  -1  163.58   27.10
   5  -4  -1  187.38   27.80
   5  -4  -1  229.08   23.20
  -5   4   1  160.48   24.50
  -5   4   1  198.98   28.00
  -5   4   1  199.78   20.10
  -5   4   1  183.08   25.60
  -5   4   1  195.18   23.60
  -5   4   1  201.48   26.20
   4  -4  -1 3086.29  126.69
   4  -4  -1 3115.59  125.79
   4  -4  -1 2836.92  122.89
   4  -4  -1 3056.19  125.89
  -4   4   1 2988.00  127.09
  -4   4   1 2903.01  120.29
  -4   4   1 2835.92  123.49
  -4   4   1 2834.32  124.49
  -4   4   1 2754.22  122.29
   3  -4  -1 2295.77   90.99
   3  -4  -1 2066.29   91.89
   3  -4  -1 2188.28   91.59
   3  -4  -1 2053.59   92.89
  -3   4   1 2092.79   88.99
  -3   4   1 2211.38   94.99
  -3   4   1 2219.18   93.69
  -3   4   1 2175.88   91.39
  -3   4   1 2152.68   92.79
   2  -4  -1  311.17   22.60
   2  -4  -1  371.16   22.60
   2  -4  -1  358.46   26.60
   2  -4  -1  353.86   22.30
   2  -4  -1  371.96   23.80
  -2   4   1  390.26   22.40
  -2   4   1  323.97   23.20
  -2   4   1  384.26   25.90
  -2   4   1  308.07   24.10
  -2   4   1  354.06   22.40
   1  -4  -1  919.51   41.80
   1  -4  -1  941.11   43.40
   1  -4  -1  932.71   42.40
   1  -4  -1  966.00   43.70
  -1   4   1  925.91   41.80
  -1   4   1  878.41   42.90
  -1   4   1 1028.80   46.40
  -1   4   1  939.41   43.00
   0  -4  -1   61.79   11.40
   0  -4  -1   42.80    9.30
   0  -4  -1   23.70   11.80
   0  -4  -1   48.60   10.10
   0  -4  -1    0.10    8.40
   0   4   1   32.60   10.10
   0   4   1   19.50   12.20
   0   4   1   62.89   12.10
   0   4   1   29.10    7.70
   0   4   1   41.70   11.50
  -1  -4  -1   89.79   13.50
  -1  -4  -1   91.59   13.50
  -1  -4  -1   78.99   16.50
  -1  -4  -1  104.99   13.60
  -1  -4  -1  103.29   11.40
   1   4   1   82.59   12.20
   1   4   1  106.69   19.40
   1   4   1  118.59   14.30
   1   4   1   92.59   11.40
   1   4   1  101.59   13.30
  -2  -4  -1 1108.69   52.59
  -2  -4  -1 1110.79   51.09
  -2  -4  -1 1123.29   58.89
  -2  -4  -1 1093.19   53.29
  -2  -4  -1 1138.69   50.39
   2   4   1 1041.30   52.49
   2   4   1 1135.39   51.49
   2   4   1 1142.69   54.09
   2   4   1 1147.69   50.19
   2   4   1 1220.88   61.29
  -3  -4  -1 1095.09   56.49
  -3  -4  -1 1082.99   52.79
  -3  -4  -1 1133.69   55.49
  -3  -4  -1 1140.09   50.99
  -3  -4  -1 1122.89   62.19
   3   4   1 1158.18   57.29
   3   4   1 1053.49   55.89
   3   4   1 1080.69   63.69
   3   4   1 1153.38   55.99
   3   4   1 1143.99   50.29
  -4  -4  -1  495.95   36.60
  -4  -4  -1  471.95   28.90
  -4  -4  -1  457.95   33.50
   4   4   1  530.55   45.90
   4   4   1  494.25   42.50
   4   4   1  482.55   28.40
   4   4   1  529.95   38.00
   4   4   1  476.15   31.80
   4   4   1  420.16   35.80
  -5  -4  -1 2880.31  117.29
  -5  -4  -1 2990.20  125.79
  -5  -4  -1 2865.11  127.19
  -5  -4  -1 2811.02  116.09
   5   4   1 3026.50  128.29
   5   4   1 2736.23  119.49
   5   4   1 2906.11  136.89
  -6  -4  -1 1446.96   64.49
  -6  -4  -1 1419.16   63.59
  -6  -4  -1 1394.06   74.19
  -6  -4  -1 1419.46   77.09
   6   4   1 1485.75   86.99
   6   4   1 1330.67   75.59
   6   4   1 1250.57   65.59
  -7  -4  -1    7.70   11.70
  -7  -4  -1    5.40   20.60
  -7  -4  -1   -0.70   11.20
  -7  -4  -1  -15.30   16.80
   7   4   1   13.40   12.30
   7   4   1   15.60   21.90
   7   4   1   -6.50   22.30
  -8  -4  -1  642.04   57.69
  -8  -4  -1  674.83   57.99
  -8  -4  -1  635.84   38.40
  -8  -4  -1  639.54   39.70
   8   4   1  587.54   56.39
   8   4   1  520.55   39.90
   8   4   1  658.83   73.69
  -9  -4  -1  228.88   40.10
  -9  -4  -1  203.18   25.50
  -9  -4  -1  251.07   45.50
   9   4   1  184.18   41.50
   9   4   1  192.18   49.50
 -10  -4  -1   69.39   19.70
 -10  -4  -1   73.79   32.20
 -10  -4  -1   93.19   36.50
  10   4   1   40.20   32.80
  10   4   1   25.50   41.60
 -11  -4  -1   38.20   39.00
 -11  -4  -1  108.89   37.60
  11   4   1   54.39   46.50
  11   4   1   68.19   36.70
 -12  -4  -1  190.48   47.30
 -12  -4  -1  159.68   50.49
  12   4   1    9.40   47.00
  12   4   1  113.09   51.89
  12   4   1   73.79   39.30
 -13  -4  -1  524.35   74.79
 -13  -4  -1  579.24   70.59
  13   4   1  325.27   61.29
  13   4   1  480.85   82.79
  13   4   1  409.76   76.59
 -14  -4  -1   95.49   51.69
 -14  -4  -1  182.68   53.29
  14   4   1  192.38   69.19
  14   4   1   62.39   54.29
  14   4   1  168.38   58.99
  16  -5  -1  199.68   58.59
 -16   5   1  193.28   62.99
 -16   5   1  228.98   60.99
  15  -5  -1   96.59   43.90
  15  -5  -1   19.80   39.50
 -15   5   1  120.59   48.00
 -15   5   1   95.79   42.40
  14  -5  -1  600.44   76.69
  14  -5  -1  559.64   79.89
 -14   5   1  529.65   77.29
 -14   5   1  654.43   83.59
  13  -5  -1  121.99   42.20
  13  -5  -1  118.89   38.70
 -13   5   1  157.58   48.30
 -13   5   1   96.69   40.30
  12  -5  -1  621.24   64.69
  12  -5  -1  706.23   81.39
  12  -5  -1  622.14   60.39
 -12   5   1  588.04   75.39
 -12   5   1  682.63   79.69
  11  -5  -1   49.80   26.20
  11  -5  -1   98.19   28.50
  11  -5  -1    9.10   25.50
 -11   5   1   59.89   32.80
 -11   5   1   98.49   34.30
  10  -5  -1   51.49   23.10
  10  -5  -1   26.90   25.50
  10  -5  -1   32.50   22.50
 -10   5   1   26.00   17.80
 -10   5   1   41.00   29.90
 -10   5   1   75.09   31.00
   9  -5  -1  810.82   64.89
   9  -5  -1  816.52   57.69
   9  -5  -1  791.92   54.09
  -9   5   1  768.62   49.70
  -9   5   1  692.83   69.69
  -9   5   1  812.42   65.09
   8  -5  -1  140.29   28.60
   8  -5  -1   90.09   23.80
   8  -5  -1   84.79   28.20
  -8   5   1   84.39   26.90
  -8   5   1   86.99   21.10
  -8   5   1   66.79   24.50
  -8   5   1   48.70   17.00
   7  -5  -1 2583.04  121.09
   7  -5  -1 2510.45  123.19
   7  -5  -1 2639.34  112.99
  -7   5   1 2723.63  125.19
  -7   5   1 2590.24  126.69
  -7   5   1 2603.64  116.09
  -7   5   1 2462.55  110.09
   6  -5  -1 2190.18  101.79
   6  -5  -1 2042.10   89.69
   6  -5  -1 2118.59  100.29
  -6   5   1 1921.71   87.29
  -6   5   1 2012.00  100.99
  -6   5   1 2054.89  102.99
  -6   5   1 2122.19   93.89
   5  -5  -1  899.51   55.49
   5  -5  -1  866.61   54.39
   5  -5  -1  960.20   45.50
  -5   5   1  871.41   56.89
  -5   5   1  821.62   51.09
  -5   5   1  858.61   51.79
  -5   5   1  973.00   55.89
  -5   5   1 1058.79   50.29
   4  -5  -1  907.91   51.39
   4  -5  -1  931.41   48.50
   4  -5  -1  960.40   50.29
   4  -5  -1  931.71   51.99
  -4   5   1  957.70   51.89
  -4   5   1  910.91   53.59
  -4   5   1  933.81   46.40
  -4   5   1  946.11   49.80
  -4   5   1  947.21   52.09
   3  -5  -1 2134.59   91.49
   3  -5  -1 2087.79   93.89
   3  -5  -1 2069.99   90.69
   3  -5  -1 2036.90   89.09
   3  -5  -1 2217.98   88.79
  -3   5   1 2030.30   92.09
  -3   5   1 2027.80   90.59
  -3   5   1 2031.70   88.79
  -3   5   1 2137.79   87.39
  -3   5   1 2168.78   93.49
   2  -5  -1 1238.68   60.59
   2  -5  -1 1231.88   56.39
   2  -5  -1 1236.08   55.99
   2  -5  -1 1264.67   56.69
   2  -5  -1 1238.28   54.19
   2  -5  -1 1142.89   54.79
  -2   5   1 1304.77   55.79
  -2   5   1 1247.08   59.69
  -2   5   1 1279.67   57.19
  -2   5   1 1249.68   55.69
  -2   5   1 1277.17   58.99
   1  -5  -1 1086.69   51.69
   1  -5  -1 1096.99   49.10
   1  -5  -1 1118.09   49.30
   1  -5  -1 1182.48   51.99
   1  -5  -1 1105.99   53.69
   1  -5  -1 1123.69   50.69
  -1   5   1 1041.50   51.69
  -1   5   1 1063.89   50.29
  -1   5   1 1127.99   53.59
  -1   5   1 1041.00   47.70
  -1   5   1 1086.59   49.10
  -1   5   1 1099.59   50.79
   0  -5  -1 1489.65   67.39
   0  -5  -1 1650.23   71.39
   0  -5  -1 1511.45   69.59
   0  -5  -1 1421.26   64.19
   0  -5  -1 1469.55   66.99
   0   5   1 1593.14   69.29
   0   5   1 1683.03   68.89
   0   5   1 1588.84   67.79
   0   5   1 1592.84   64.29
   0   5   1 1602.54   72.49
  -1  -5  -1 2676.83  105.79
  -1  -5  -1 2652.13  109.79
  -1  -5  -1 2681.23  115.29
  -1  -5  -1 2645.24  110.29
  -1  -5  -1 2772.02  109.79
   1   5   1 2868.01  110.39
   1   5   1 2601.64  108.89
   1   5   1 2725.53  116.89
   1   5   1 2494.05  106.09
   1   5   1 2701.73  109.99
  -2  -5  -1   20.80    9.20
  -2  -5  -1   -8.60    9.40
  -2  -5  -1   13.40    9.50
  -2  -5  -1   21.90   11.10
  -2  -5  -1    9.30   14.20
   2   5   1   17.40   10.40
   2   5   1    3.90    8.80
   2   5   1   26.90   17.50
   2   5   1   29.90   11.90
   2   5   1   20.90   13.10
  -3  -5  -1 3311.07  139.89
  -3  -5  -1 3437.36  137.19
  -3  -5  -1 3558.64  137.49
   3   5   1 3263.17  150.18
   3   5   1 3521.75  135.89
   3   5   1 3373.46  140.49
   3   5   1 3377.56  140.29
   3   5   1 3354.16  142.09
  -4  -5  -1 1949.80   90.09
  -4  -5  -1 2007.90   84.59
  -4  -5  -1 1901.01   86.69
   4   5   1 1954.10   83.49
   4   5   1 1976.10   90.89
   4   5   1 1917.31  101.19
  -5  -5  -1  210.28   28.20
  -5  -5  -1  181.98   21.70
  -5  -5  -1  208.28   25.40
   5   5   1  172.08   22.50
   5   5   1  169.28   34.60
   5   5   1  171.28   27.80
  -6  -5  -1   45.00   18.60
  -6  -5  -1   51.89   14.60
  -6  -5  -1   24.20   12.00
  -6  -5  -1   43.20   21.40
   6   5   1   28.10   14.50
   6   5   1   37.90   21.70
   6   5   1   79.19   31.50
  -7  -5  -1   18.00   18.10
  -7  -5  -1   10.60   12.00
  -7  -5  -1   19.80   13.00
  -7  -5  -1   -1.60   20.30
   7   5   1    1.60   12.20
   7   5   1   -5.10   25.40
   7   5   1  -16.20   18.60
  -8  -5  -1  470.55   48.40
  -8  -5  -1  381.16   33.60
  -8  -5  -1  526.05   56.09
  -8  -5  -1  417.46   32.20
   8   5   1  527.15   67.19
   8   5   1  442.76   50.49
  -9  -5  -1  350.06   33.60
  -9  -5  -1  294.87   44.00
  -9  -5  -1  351.66   50.69
   9   5   1  325.97   50.49
   9   5   1  356.66   64.99
 -10  -5  -1 1108.99   61.99
 -10  -5  -1 1080.79   78.89
 -10  -5  -1 1191.58   86.99
  10   5   1 1139.19   91.99
  10   5   1 1104.59  100.99
  10   5   1 1049.09   83.59
 -11  -5  -1  561.44   64.79
 -11  -5  -1  535.65   67.99
  11   5   1  406.86   72.59
  11   5   1  479.45   67.29
  11   5   1  501.95   74.59
 -12  -5  -1   81.89   45.00
 -12  -5  -1   29.50   33.70
  12   5   1   11.70   38.40
  12   5   1   -4.10   39.50
  12   5   1   84.79   53.99
 -13  -5  -1   14.10   36.20
 -13  -5  -1   -9.70   41.20
  13   5   1   81.49   51.49
  13   5   1   33.90   45.80
  13   5   1   12.10   50.49
 -14  -5  -1  104.09   57.39
 -14  -5  -1  -23.60   39.60
  14   5   1   70.29   47.70
  14   5   1   64.09   52.99
  14   5   1    4.50   54.39
  16  -6  -1  136.19   53.99
 -16   6   1   77.49   48.30
 -16   6   1   32.80   41.70
  15  -6  -1   24.70   41.50
 -15   6   1   -9.50   40.70
 -15   6   1  -47.80   32.50
  14  -6  -1    5.10   32.80
  14  -6  -1   -0.30   30.50
 -14   6   1   34.20   38.80
 -14   6   1   26.70   34.20
  13  -6  -1   74.89   28.50
  13  -6  -1   21.50   27.90
  13  -6  -1  102.39   40.10
 -13   6   1   -4.90   29.90
 -13   6   1  -20.90   28.20
  12  -6  -1  902.91   70.79
  12  -6  -1  956.10   83.29
  12  -6  -1 1007.10   72.59
 -12   6   1 1078.49  102.79
 -12   6   1  968.90   84.39
  11  -6  -1  599.64   54.29
  11  -6  -1  551.14   66.99
  11  -6  -1  671.53   63.39
 -11   6   1  565.74   45.90
 -11   6   1  648.64   75.09
 -11   6   1  649.74   77.19
  10  -6  -1  489.65   49.10
  10  -6  -1  498.85   57.79
  10  -6  -1  463.35   52.79
 -10   6   1  360.16   54.99
 -10   6   1  450.95   44.50
 -10   6   1  412.76   56.49
   9  -6  -1  818.12   54.79
   9  -6  -1  850.71   67.39
   9  -6  -1  891.91   62.89
  -9   6   1  860.91   55.39
  -9   6   1  770.72   66.69
  -9   6   1  920.31   68.39
   8  -6  -1  980.90   64.19
   8  -6  -1  941.31   66.39
   8  -6  -1  978.60   54.89
  -8   6   1  816.22   50.09
  -8   6   1 1058.79   68.59
  -8   6   1 1026.20   58.49
  -8   6   1  898.31   68.19
   7  -6  -1  391.46   32.80
   7  -6  -1  524.95   50.49
   7  -6  -1  429.06   48.00
  -7   6   1  446.46   50.19
  -7   6   1  447.66   46.60
  -7   6   1  390.46   38.30
   6  -6  -1  294.87   36.50
   6  -6  -1  363.46   40.10
   6  -6  -1  287.47   25.80
  -6   6   1  293.77   30.90
  -6   6   1  294.67   37.70
  -6   6   1  389.66   44.80
   5  -6  -1  538.75   42.10
  -5   6   1  557.34   34.80
  -5   6   1  618.74   43.60
  -5   6   1  559.24   39.00
  -5   6   1  596.24   44.90
   4  -6  -1 2074.79   96.69
   4  -6  -1 2165.88   95.39
   4  -6  -1 2193.28   93.49
   4  -6  -1 2202.18  100.49
   4  -6  -1 2163.18   97.49
  -4   6   1 2112.09   97.79
  -4   6   1 2103.19   97.49
  -4   6   1 2270.37   95.99
  -4   6   1 2194.68   91.79
  -4   6   1 2129.99   99.99
   3  -6  -1  251.97   29.20
   3  -6  -1  208.78   21.60
   3  -6  -1  174.38   20.90
   3  -6  -1  248.78   22.00
   3  -6  -1  249.58   26.40
  -3   6   1  234.18   21.80
  -3   6   1  238.18   24.30
  -3   6   1  241.08   25.30
  -3   6   1  254.07   27.90
  -3   6   1  234.68   26.30
   2  -6  -1 3394.46  140.89
   2  -6  -1 3610.24  142.19
   2  -6  -1 3563.34  141.89
   2  -6  -1 3431.46  142.29
   2  -6  -1 3578.14  141.19
   2  -6  -1 3495.25  146.89
  -2   6   1 3715.53  146.89
  -2   6   1 3433.26  140.79
  -2   6   1 3640.34  143.29
  -2   6   1 3670.13  141.69
  -2   6   1 3476.65  144.09
   1  -6  -1 2486.85  106.19
   1  -6  -1 2624.94  105.89
   1  -6  -1 2722.33  110.19
   1  -6  -1 2470.05  103.99
   1  -6  -1 2619.54  107.59
  -1   6   1 2600.54  106.39
  -1   6   1 2492.55  104.99
  -1   6   1 2509.25  107.49
  -1   6   1 2316.77  101.49
  -1   6   1 2609.14  104.69
  -1   6   1 2637.14  108.59
   0  -6  -1 2078.49   85.49
   0  -6  -1 2026.90   88.69
   0  -6  -1 2221.68   90.09
   0  -6  -1 2136.19   93.39
   0  -6  -1 2047.70   91.79
   0   6   1 2065.89   84.89
   0   6   1 1942.81   88.39
   0   6   1 2120.09   95.59
   0   6   1 2097.49   90.89
   0   6   1 2262.17   90.59
  -1  -6  -1   62.29   11.70
  -1  -6  -1   33.80   13.60
  -1  -6  -1   56.99   14.00
  -1  -6  -1   50.39   13.60
  -1  -6  -1   45.70   16.70
   1   6   1   40.00   12.50
   1   6   1   36.60   10.40
   1   6   1   59.39   16.10
   1   6   1   44.50   13.20
   1   6   1   28.30   18.00
  -2  -6  -1  971.90   49.20
  -2  -6  -1  909.91   42.80
  -2  -6  -1  910.41   47.90
   2   6   1  873.21   44.70
   2   6   1  932.81   59.29
   2   6   1  849.61   44.90
   2   6   1  887.71   47.80
   2   6   1  888.51   48.90
  -3  -6  -1 1328.37   61.99
  -3  -6  -1 1339.77   66.79
  -3  -6  -1 1402.46   65.09
   3   6   1 1305.47   64.69
   3   6   1 1412.46   63.39
   3   6   1 1420.86   79.99
   3   6   1 1372.26   67.29
  -4  -6  -1 1034.80   51.89
  -4  -6  -1  965.80   55.79
  -4  -6  -1  962.40   51.59
   4   6   1 1001.40   69.39
   4   6   1  915.21   48.90
   4   6   1 1001.60   56.79
   4   6   1 1056.19   57.49
  -5  -6  -1 2892.61  130.29
  -5  -6  -1 2927.01  122.99
  -5  -6  -1 2897.31  125.99
   5   6   1 3004.30  145.19
   5   6   1 2829.42  124.49
   5   6   1 2956.70  121.99
   5   6   1 2899.81  132.39
   5   6   1 3003.30  131.39
  -6  -6  -1 1652.13   86.79
  -6  -6  -1 1583.74   74.19
  -6  -6  -1 1608.44   81.69
  -6  -6  -1 1620.14   76.29
   6   6   1 1628.54   89.99
   6   6   1 1649.83  100.89
   6   6   1 1640.14   87.09
  -7  -6  -1   -8.00   13.60
  -7  -6  -1   17.60   19.60
  -7  -6  -1    8.80   22.10
  -7  -6  -1   -9.60   12.30
   7   6   1  -11.60   24.30
   7   6   1   -7.20   20.10
   7   6   1   -6.90   28.30
  -8  -6  -1  784.92   66.29
  -8  -6  -1  857.61   61.19
  -8  -6  -1  828.92   51.29
   8   6   1  739.33   82.99
   8   6   1  939.91   73.89
   8   6   1  937.11   68.49
  -9  -6  -1   51.69   20.70
  -9  -6  -1   96.39   36.40
  -9  -6  -1   31.70   25.80
   9   6   1   12.50   33.50
   9   6   1   47.50   42.20
   9   6   1   30.00   30.70
 -10  -6  -1   52.79   28.60
 -10  -6  -1    8.20   33.70
  10   6   1   83.69   48.90
  10   6   1   62.79   41.70
  10   6   1   84.59   37.50
 -11  -6  -1  168.48   42.10
 -11  -6  -1  112.49   47.20
  11   6   1  108.49   48.70
  11   6   1   98.39   39.50
  11   6   1  169.98   58.39
 -12  -6  -1   16.20   41.40
 -12  -6  -1  -23.70   28.60
  12   6   1   49.80   51.49
  12   6   1   -0.80   43.40
  12   6   1    5.50   36.30
 -13  -6  -1  320.47   56.49
 -13  -6  -1  229.68   58.49
  13   6   1  345.87   72.29
  13   6   1  231.98   52.89
  13   6   1  297.97   76.69
  16  -7  -1  209.48   59.09
 -16   7   1  161.88   56.49
 -16   7   1  202.08   59.79
  15  -7  -1   19.50   37.60
 -15   7   1   24.10   41.90
 -15   7   1   50.09   40.60
  14  -7  -1  470.65   61.39
  14  -7  -1  471.15   70.59
 -14   7   1  586.34   82.19
 -14   7   1  551.04   82.99
  13  -7  -1  146.09   38.20
  13  -7  -1  227.28   42.80
  13  -7  -1  181.88   47.00
 -13   7   1  208.88   48.70
 -13   7   1  136.09   45.50
  12  -7  -1  316.37   48.20
  12  -7  -1  362.66   59.49
  12  -7  -1  368.36   49.30
 -12   7   1  388.56   59.09
 -12   7   1  309.07   57.49
 -12   7   1  317.27   39.50
  11  -7  -1  -12.40   23.30
  11  -7  -1  -17.10   22.60
  11  -7  -1   12.90   21.10
 -11   7   1   41.40   32.70
 -11   7   1   20.60   30.40
 -11   7   1  -13.60   19.00
  10  -7  -1   70.39   32.50
  10  -7  -1   34.10   27.10
  10  -7  -1   52.09   23.70
 -10   7   1   46.70   27.30
 -10   7   1   26.90   20.90
 -10   7   1   65.89   30.20
   9  -7  -1  213.38   36.60
   9  -7  -1  192.18   39.40
   9  -7  -1  276.47   35.30
  -9   7   1  247.38   35.10
  -9   7   1  297.97   48.70
  -9   7   1  225.48   39.90
   8  -7  -1   43.80   23.00
   8  -7  -1   39.40   17.30
   8  -7  -1   10.10   21.00
  -8   7   1   53.39   25.10
  -8   7   1   23.20   17.50
  -8   7   1   36.50   21.80
   7  -7  -1 2289.57  116.29
   7  -7  -1 2466.35  117.49
  -7   7   1 2304.97  105.29
  -7   7   1 2187.08  117.49
  -7   7   1 2487.85  118.19
   6  -7  -1 1181.68   69.09
   6  -7  -1 1184.48   71.09
  -6   7   1 1220.78   72.39
  -6   7   1 1223.48   70.19
  -6   7   1 1108.29   58.89
   5  -7  -1  505.95   42.20
   5  -7  -1  529.45   36.50
  -5   7   1  540.55   42.10
  -5   7   1  539.85   34.20
  -5   7   1  602.24   40.40
  -5   7   1  516.25   43.80
   4  -7  -1  849.91   48.40
   4  -7  -1  763.72   43.90
   4  -7  -1  738.43   47.40
   4  -7  -1  834.42   53.19
  -4   7   1  840.42   49.30
  -4   7   1  792.62   50.89
  -4   7   1  761.22   44.80
  -4   7   1  871.41   43.30
   3  -7  -1  337.17   24.30
   3  -7  -1  296.67   25.50
   3  -7  -1  295.17   28.50
   3  -7  -1  369.66   35.80
   3  -7  -1  285.67   27.40
   3  -7  -1  299.17   24.80
  -3   7   1  311.87   32.00
  -3   7   1  288.37   23.60
  -3   7   1  256.87   28.30
  -3   7   1  263.97   26.00
  -3   7   1  332.47   25.70
   2  -7  -1 1020.10   50.99
   2  -7  -1 1087.09   53.69
   2  -7  -1 1038.80   58.29
   2  -7  -1 1123.79   53.59
   2  -7  -1  987.00   50.89
   2  -7  -1 1089.69   53.69
  -2   7   1 1066.39   51.29
  -2   7   1 1152.48   57.59
  -2   7   1 1038.50   53.59
  -2   7   1 1025.40   54.39
   1  -7  -1  177.68   21.80
   1  -7  -1  189.48   24.80
   1  -7  -1  152.18   24.10
   1  -7  -1  178.18   20.60
   1  -7  -1  195.48   23.60
  -1   7   1  213.08   25.40
  -1   7   1  199.88   24.60
  -1   7   1  206.78   22.40
  -1   7   1  202.58   18.60
  -1   7   1  196.68   25.60
  -1   7   1  141.89   19.40
   0  -7  -1  835.42   41.40
   0  -7  -1  866.91   49.30
   0  -7  -1  886.71   46.10
   0  -7  -1  831.12   44.90
   0  -7  -1  866.81   50.49
   0   7   1  874.11   45.40
   0   7   1  759.72   45.70
   0   7   1  946.71   47.60
   0   7   1  811.72   39.90
   0   7   1  715.93   50.39
  -1  -7  -1 1522.25   74.39
  -1  -7  -1 1512.25   74.99
  -1  -7  -1 1700.33   68.89
  -1  -7  -1 1583.44   80.09
   1   7   1 1711.13   76.09
   1   7   1 1572.84   72.69
   1   7   1 1756.82   84.39
   1   7   1 1459.05   67.99
   1   7   1 1510.35   73.39
  -2  -7  -1  274.97   27.10
  -2  -7  -1  310.57   29.90
  -2  -7  -1  308.97   23.20
   2   7   1  316.87   25.70
   2   7   1  291.97   38.60
   2   7   1  336.67   29.10
   2   7   1  271.27   25.50
  -3  -7  -1 1478.25   75.49
  -3  -7  -1 1567.94   76.69
  -3  -7  -1 1619.74   71.59
   3   7   1 1645.84   92.09
   3   7   1 1719.93   73.59
   3   7   1 1570.94   73.29
   3   7   1 1620.94   77.49
  -4  -7  -1  453.15   34.50
  -4  -7  -1  446.66   37.60
  -4  -7  -1  427.36   31.80
   4   7   1  445.46   31.90
   4   7   1  447.46   36.00
   4   7   1  456.95   53.79
   4   7   1  401.86   39.00
  -5  -7  -1   61.29   18.90
  -5  -7  -1   56.09   20.30
  -5  -7  -1  109.19   20.60
   5   7   1  110.69   25.80
   5   7   1   54.99   32.60
   5   7   1   71.89   22.60
  -6  -7  -1   45.50   23.80
  -6  -7  -1   42.80   19.40
  -6  -7  -1   57.29   17.60
   6   7   1   63.89   24.90
   6   7   1   46.00   32.70
   6   7   1   32.50   24.70
  -7  -7  -1   12.00   24.40
  -7  -7  -1   40.70   18.60
  -7  -7  -1   49.80   17.20
  -7  -7  -1   37.50   21.00
   7   7   1   35.10   34.90
   7   7   1   61.39   29.40
   7   7   1   62.99   27.40
  -8  -7  -1 1275.97   68.49
  -8  -7  -1 1258.97   83.69
  -8  -7  -1 1203.98   74.89
   8   7   1 1256.07  102.49
   8   7   1 1228.68   81.79
   8   7   1 1212.28   84.99
  -9  -7  -1   77.19   31.10
  -9  -7  -1  178.18   44.70
  -9  -7  -1   88.19   24.20
   9   7   1  125.99   40.80
   9   7   1   55.89   46.40
   9   7   1   75.29   39.40
 -10  -7  -1  703.83   73.59
 -10  -7  -1  608.04   63.79
  10   7   1  600.34   85.89
  10   7   1  653.53   77.69
  10   7   1  594.14   66.59
 -11  -7  -1  402.56   64.69
 -11  -7  -1  309.37   50.69
  11   7   1  293.27   60.49
  11   7   1  390.46   80.29
  11   7   1  445.56   62.69
 -12  -7  -1   -9.00   41.10
 -12  -7  -1   40.60   35.20
  12   7   1   27.70   53.39
  12   7   1   -5.30   37.20
  12   7   1   46.80   45.20
 -13  -7  -1   -0.30   38.00
 -13  -7  -1   64.79   48.50
  13   7   1   52.39   50.59
  13   7   1   18.70   60.19
  13   7   1   16.00   46.50
  16  -8  -1   18.60   44.70
 -16   8   1   31.10   44.50
 -16   8   1   20.50   36.90
  15  -8  -1   44.10   37.20
 -15   8   1  -45.40   31.00
 -15   8   1   17.20   43.50
  14  -8  -1   -2.60   30.70
 -14   8   1   12.90   35.10
 -14   8   1   -3.20   32.80
  13  -8  -1   38.60   29.20
  13  -8  -1   36.00   33.70
  13  -8  -1   57.39   29.40
 -13   8   1   82.79   39.10
 -13   8   1  -21.20   27.40
  12  -8  -1 1279.77   80.19
  12  -8  -1 1343.97   98.69
  12  -8  -1 1328.07   89.79
 -12   8   1 1286.17   78.19
 -12   8   1 1265.17  101.29
 -12   8   1 1390.56  101.69
  11  -8  -1  917.41   59.89
  11  -8  -1  774.52   78.99
  11  -8  -1  803.72   75.19
 -11   8   1  734.03   81.89
 -11   8   1  868.71   89.89
 -11   8   1  785.32   60.09
  10  -8  -1  619.24   63.99
  10  -8  -1  532.55   62.89
  10  -8  -1  538.55   45.10
 -10   8   1  539.85   67.69
 -10   8   1  591.64   56.69
 -10   8   1  612.34   68.79
   9  -8  -1 1213.78   78.79
   9  -8  -1 1183.98   64.39
   9  -8  -1 1098.99   78.59
  -9   8   1 1200.18   84.09
  -9   8   1 1161.28   79.89
   8  -8  -1  289.67   31.80
   8  -8  -1  266.37   41.10
   8  -8  -1  275.17   43.00
  -8   8   1  247.68   37.90
  -8   8   1  259.97   31.30
  -8   8   1  266.47   43.40
   7  -8  -1   16.20   19.70
   7  -8  -1   19.70   19.30
  -7   8   1   19.70   20.70
  -7   8   1   14.00   19.20
  -7   8   1   12.30   14.20
   6  -8  -1  155.68   28.80
  -6   8   1  169.08   29.40
  -6   8   1  171.38   31.60
  -6   8   1  156.78   21.70
   5  -8  -1  512.85   42.00
   5  -8  -1  606.14   46.70
   5  -8  -1  613.54   39.30
  -5   8   1  527.35   34.60
  -5   8   1  540.05   43.40
  -5   8   1  552.54   45.80
   4  -8  -1 1601.64   82.99
   4  -8  -1 1509.35   77.79
   4  -8  -1 1621.94   74.29
  -4   8   1 1664.33   72.59
  -4   8   1 1558.14   81.59
  -4   8   1 1668.93   79.39
  -4   8   1 1533.45   74.99
   3  -8  -1   35.10   14.80
   3  -8  -1   63.49   20.80
   3  -8  -1   67.49   16.90
   3  -8  -1   63.49   16.90
   3  -8  -1   51.89   15.60
  -3   8   1   62.59   16.90
  -3   8   1   50.99   13.80
  -3   8   1   44.30   13.60
  -3   8   1   46.00   17.10
   2  -8  -1 3919.81  166.18
   2  -8  -1 4045.40  161.28
   2  -8  -1 3878.91  157.58
   2  -8  -1 4089.49  161.18
   2  -8  -1 4012.20  160.98
  -2   8   1 3834.22  161.08
  -2   8   1 3721.23  157.68
  -2   8   1 3994.50  161.68
   1  -8  -1  671.53   45.90
   1  -8  -1  635.44   40.90
   1  -8  -1  671.23   42.10
   1  -8  -1  700.63   45.20
  -1   8   1  665.23   35.40
  -1   8   1  705.13   45.80
  -1   8   1  622.24   39.70
  -1   8   1  557.64   40.60
  -1   8   1  665.73   40.10
   0  -8  -1 1431.56   73.79
   0  -8  -1 1496.65   70.19
   0  -8  -1 1416.96   74.69
   0   8   1 1414.96   63.19
   0   8   1 1331.77   68.09
   0   8   1 1406.86   76.49
   0   8   1 1565.94   71.49
   0   8   1 1541.55   78.39
   0   8   1 1469.85   67.69
  -1  -8  -1  289.37   23.20
  -1  -8  -1  249.58   29.50
  -1  -8  -1  318.87   33.50
   1   8   1  293.47   40.10
   1   8   1  267.57   22.50
   1   8   1  303.37   33.50
  -2  -8  -1  339.97   33.70
  -2  -8  -1  296.37   23.50
  -2  -8  -1  297.97   31.30
   2   8   1  297.47   26.90
   2   8   1  236.18   39.40
   2   8   1  301.57   29.10
  -3  -8  -1 1241.88   60.09
  -3  -8  -1 1196.48   66.79
  -3  -8  -1 1426.26   68.59
   3   8   1 1374.76   83.49
  -4  -8  -1  814.22   52.29
  -4  -8  -1  774.92   50.59
  -4  -8  -1  822.02   46.30
   4   8   1  862.81   71.19
   4   8   1  853.61   49.60
   4   8   1  790.92   52.79
  -5  -8  -1 1084.99   65.89
  -5  -8  -1 1180.78   62.09
  -5  -8  -1 1030.20   58.29
   5   8   1 1086.29   64.29
   5   8   1 1088.39   66.29
   5   8   1 1006.00   82.39
  -6  -8  -1  812.32   52.69
  -6  -8  -1  878.81   54.39
  -6  -8  -1  885.31   61.99
   6   8   1  870.31   61.69
   6   8   1  760.92   80.89
   6   8   1  801.62   59.09
  -7  -8  -1    2.50   19.90
  -7  -8  -1  -20.40   22.60
  -7  -8  -1    4.80   18.30
   7   8   1   34.60   46.40
   7   8   1    0.80   26.00
   7   8   1    3.50   26.60
  -8  -8  -1   78.29   27.90
  -8  -8  -1   78.69   25.40
  -8  -8  -1  121.19   36.60
   8   8   1   95.09   34.30
   8   8   1   67.79   35.10
   8   8   1  124.19   49.70
  -9  -8  -1   85.69   38.10
  -9  -8  -1   49.99   28.00
  -9  -8  -1   15.40   22.50
   9   8   1  -23.30   40.80
   9   8   1  107.09   39.40
   9   8   1   35.30   33.80
 -10  -8  -1   56.79   41.60
 -10  -8  -1   25.30   28.80
  10   8   1   -0.20   45.20
  10   8   1   39.40   35.40
  10   8   1   -9.10   34.70
 -11  -8  -1  321.27   60.39
 -11  -8  -1  195.88   44.60
  11   8   1  154.58   46.60
  11   8   1  285.97   74.99
  11   8   1  241.98   57.39
 -12  -8  -1  109.49   53.29
 -12  -8  -1  115.39   44.20
  12   8   1   44.30   54.39
  12   8   1  121.19   47.70
  16  -9  -1   99.19   55.89
 -16   9   1   93.69   49.99
 -16   9   1  156.98   55.29
  15  -9  -1  153.58   50.39
 -15   9   1   93.49   53.49
 -15   9   1  197.78   58.59
  14  -9  -1  435.06   60.99
  14  -9  -1  544.45   76.49
 -14   9   1  497.25   76.79
 -14   9   1  486.45   78.89
  13  -9  -1    9.50   24.10
  13  -9  -1   41.60   32.90
  13  -9  -1   19.20   28.50
 -13   9   1   27.30   33.90
 -13   9   1    1.70   32.40
  12  -9  -1  233.98   46.40
  12  -9  -1  227.58   49.20
  12  -9  -1  192.08   35.00
 -12   9   1  176.18   49.99
 -12   9   1  151.08   44.40
 -12   9   1  213.28   38.80
  11  -9  -1   45.60   31.90
  11  -9  -1    8.30   25.80
  11  -9  -1   20.00   20.30
 -11   9   1  -36.50   20.60
 -11   9   1   -1.50   27.40
 -11   9   1   -6.20   27.20
  10  -9  -1   10.30   23.00
  10  -9  -1   29.90   28.20
  10  -9  -1    0.60   15.10
 -10   9   1    9.00   23.20
 -10   9   1   28.10   25.00
 -10   9   1   16.90   27.80
   9  -9  -1  266.17   44.30
   9  -9  -1  203.58   38.90
  -9   9   1  221.78   43.60
  -9   9   1  171.48   40.20
   8  -9  -1  143.19   33.20
   8  -9  -1   70.39   27.20
  -8   9   1  143.69   33.20
  -8   9   1  120.79   22.60
  -8   9   1  106.59   28.50
   7  -9  -1 1608.24   90.49
   7  -9  -1 1828.92   97.19
  -7   9   1 1522.15   92.99
  -7   9   1 1648.73   91.39
  -7   9   1 1587.04   77.19
   6  -9  -1  490.95   51.69
   6  -9  -1  511.85   39.40
  -6   9   1  605.44   47.50
  -6   9   1  532.75   52.99
  -6   9   1  536.55   36.00
   5  -9  -1 1432.96   68.49
   5  -9  -1 1357.96   73.59
   5  -9  -1 1255.17   76.09
  -5   9   1 1257.87   63.49
  -5   9   1 1258.37   72.79
  -5   9   1 1379.96   76.49
   4  -9  -1  638.64   41.30
   4  -9  -1  654.03   49.90
   4  -9  -1  671.93   45.70
   4  -9  -1  674.53   39.10
  -4   9   1  636.14   38.80
  -4   9   1  661.53   48.00
  -4   9   1  629.74   45.20
   3  -9  -1  352.46   32.10
   3  -9  -1  333.47   30.30
   3  -9  -1  307.17   31.10
   3  -9  -1  341.77   38.80
  -3   9   1  282.47   32.40
  -3   9   1  299.97   32.10
   2  -9  -1  562.74   39.80
   2  -9  -1  535.45   34.70
   2  -9  -1  517.85   43.70
   2  -9  -1  521.75   38.30
   2  -9  -1  584.14   40.80
  -2   9   1  512.45   38.20
  -2   9   1  517.35   32.10
  -2   9   1  549.74   40.30
  -2   9   1  491.55   38.70
   1  -9  -1 1115.29   62.09
   1  -9  -1 1064.09   62.79
   1  -9  -1 1014.10   58.79
   1  -9  -1 1056.89   57.89
  -1   9   1 1093.09   56.89
  -1   9   1 1099.99   59.59
  -1   9   1 1161.88   64.09
  -1   9   1 1005.10   50.59
   0  -9  -1  326.57   36.60
   0  -9  -1  411.76   34.50
   0   9   1  354.06   41.30
   0   9   1  428.56   35.50
   0   9   1  462.25   32.70
   0   9   1  472.65   27.70
  -1  -9  -1 1441.96   74.49
  -1  -9  -1 1440.56   72.79
  -1  -9  -1 1423.86   64.69
   1   9   1 1399.76   64.39
   1   9   1 1383.36   82.69
  -2  -9  -1  208.98   22.10
  -2  -9  -1  232.48   27.50
  -2  -9  -1  210.38   28.70
   2   9   1  205.28   23.40
   2   9   1  213.38   30.60
   2   9   1  218.58   40.40
  -3  -9  -1  855.51   45.90
  -3  -9  -1  821.72   53.49
  -3  -9  -1  887.91   54.69
   3   9   1  837.72   68.29
   3   9   1  884.11   54.39
  -4  -9  -1   24.10   22.50
  -4  -9  -1   20.80   19.40
  -4  -9  -1   57.49   16.10
   4   9   1   36.30   17.80
   4   9   1   37.60   21.20
   4   9   1   25.50   31.80
  -5  -9  -1   24.70   20.70
  -5  -9  -1   40.80   22.70
  -5  -9  -1   27.40   17.10
   5   9   1   34.10   22.50
   5   9   1    8.80   31.70
   5   9   1   31.30   20.50
  -6  -9  -1   87.59   29.90
  -6  -9  -1   48.50   22.30
  -6  -9  -1   44.00   21.50
   6   9   1   41.10   25.40
   6   9   1   74.79   27.90
   6   9   1   60.19   42.90
  -7  -9  -1  110.99   25.70
  -7  -9  -1  119.99   34.60
  -7  -9  -1   30.80   22.30
   7   9   1   60.29   30.10
   7   9   1   39.30   42.90
   7   9   1   44.80   29.50
  -8  -9  -1  680.73   51.79
  -8  -9  -1  651.63   65.19
  -8  -9  -1  529.15   52.69
   8   9   1  577.04   61.79
   8   9   1  548.45   80.59
   8   9   1  659.63   66.99
  -9  -9  -1   42.90   37.50
  -9  -9  -1    4.90   25.30
   9   9   1   15.00   33.00
   9   9   1   57.19   36.00
   9   9   1   56.29   50.99
 -10  -9  -1  242.48   53.79
 -10  -9  -1  156.28   39.20
  10   9   1  314.27   57.09
  10   9   1  212.88   65.19
  10   9   1  280.57   54.19
 -11  -9  -1  135.29   41.40
 -11  -9  -1  244.18   57.59
  11   9   1  217.18   57.89
  11   9   1  165.48   64.09
 -12  -9  -1   35.00   47.00
  12   9   1   16.50   56.79
  12   9   1  -48.00   39.80
  16 -10  -1   28.60   49.70
 -16  10   1   25.10   41.30
 -16  10   1   46.50   43.30
  15 -10  -1    0.70   38.60
 -15  10   1  -36.50   32.50
 -15  10   1  -17.30   37.10
  14 -10  -1   98.29   46.10
  14 -10  -1    8.90   29.50
 -14  10   1   13.40   38.70
 -14  10   1  -64.89   27.10
  13 -10  -1   24.80   31.30
  13 -10  -1    0.90   29.50
 -13  10   1   21.20   25.60
 -13  10   1  -32.60   29.70
 -13  10   1   34.30   35.00
  12 -10  -1  939.81   63.09
  12 -10  -1  985.30   87.09
  12 -10  -1  957.10   81.59
 -12  10   1 1039.80  105.59
 -12  10   1  809.22   68.29
 -12  10   1 1087.49   90.49
  11 -10  -1  166.68   40.40
  11 -10  -1  180.08   44.20
 -11  10   1  196.58   43.40
 -11  10   1  158.88   36.20
 -11  10   1  217.38   49.70
  10 -10  -1  775.72   75.99
  10 -10  -1  886.81   81.19
 -10  10   1  705.43   77.59
 -10  10   1  833.22   73.09
   9 -10  -1  796.02   67.19
   9 -10  -1  800.72   68.39
  -9  10   1  806.12   67.69
  -9  10   1  693.73   75.09
   8 -10  -1   61.59   27.30
   8 -10  -1  113.49   29.60
  -8  10   1   99.49   29.60
  -8  10   1   60.59   18.50
  -8  10   1   69.29   29.10
   7 -10  -1   -6.60   17.40
  -7  10   1   28.30   20.80
  -7  10   1   31.60   23.60
  -7  10   1   11.50   13.50
   6 -10  -1  233.98   38.20
   6 -10  -1  189.18   27.50
   6 -10  -1  169.78   32.50
  -6  10   1  200.98   34.10
  -6  10   1  194.58   23.90
  -6  10   1  143.59   28.90
   5 -10  -1  570.34   54.69
   5 -10  -1  598.94   46.30
   5 -10  -1  558.94   41.10
  -5  10   1  522.85   36.20
  -5  10   1  612.84   49.99
  -5  10   1  541.25   45.30
   4 -10  -1 1011.60   55.79
   4 -10  -1 1039.00   64.89
   4 -10  -1  996.40   60.09
   4 -10  -1 1019.70   53.99
  -4  10   1 1019.00   60.49
  -4  10   1  957.30   52.19
  -4  10   1  870.01   60.19
   3 -10  -1  527.75   50.09
   3 -10  -1  456.65   40.00
   3 -10  -1  606.74   40.40
   3 -10  -1  466.05   38.00
  -3  10   1  415.96   41.40
  -3  10   1  473.15   33.30
  -3  10   1  567.84   42.10
   2 -10  -1 1897.01   95.49
   2 -10  -1 1991.30   91.49
   2 -10  -1 2020.30   91.29
   2 -10  -1 2029.40   90.79
  -2  10   1 1689.23   81.29
  -2  10   1 1792.12   87.99
  -2  10   1 1788.02   89.29
   1 -10  -1   89.19   24.50
   1 -10  -1   93.39   22.50
   1 -10  -1   85.29   19.90
  -1  10   1   71.29   24.40
  -1  10   1   82.79   21.10
  -1  10   1  108.99   16.20
  -1  10   1   95.09   21.80
   0 -10  -1  212.78   26.50
   0 -10  -1  192.08   30.70
   0  10   1  246.38   27.20
   0  10   1  152.98   31.80
   0  10   1  200.88   20.60
   0  10   1  218.28   28.80
  -1 -10  -1   83.59   24.10
  -1 -10  -1   39.80   18.20
  -1 -10  -1   73.79   16.30
   1  10   1   72.29   20.30
   1  10   1   44.70   13.50
   1  10   1   73.59   28.80
  -2 -10  -1  682.33   49.60
  -2 -10  -1  663.63   48.90
  -2 -10  -1  622.14   38.60
   2  10   1  596.94   38.80
   2  10   1  680.33   49.10
   2  10   1  737.33   62.89
  -3 -10  -1  690.73   51.09
  -3 -10  -1  770.02   52.49
  -3 -10  -1  679.13   40.80
   3  10   1  723.33   51.29
   3  10   1  501.95   60.99
  -4 -10  -1   72.69   24.40
  -4 -10  -1  137.59   29.70
  -4 -10  -1  110.39   20.40
   4  10   1  165.78   43.40
   4  10   1  112.69   30.00
  -5 -10  -1  540.95   55.99
  -5 -10  -1  482.25   47.40
  -5 -10  -1  481.35   37.40
   5  10   1  472.25   40.80
   5  10   1  449.86   65.29
   5  10   1  475.35   51.99
  -6 -10  -1  734.03   57.79
  -6 -10  -1  766.02   52.49
  -6 -10  -1  888.11   66.39
   6  10   1  805.72   62.59
   6  10   1  859.11   58.19
   6  10   1  671.03   82.49
  -7 -10  -1    6.50   23.00
  -7 -10  -1   20.60   21.40
  -7 -10  -1   -2.40   25.50
   7  10   1  -10.10   23.70
   7  10   1   60.99   30.10
   7  10   1   -7.20   38.10
  -8 -10  -1  217.68   35.40
  -8 -10  -1  171.98   43.10
  -8 -10  -1  276.07   40.20
   8  10   1  207.48   42.50
   8  10   1  226.28   46.30
   8  10   1  234.48   60.59
  -9 -10  -1   16.30   25.70
  -9 -10  -1   30.80   39.20
   9  10   1   15.30   34.00
   9  10   1    5.90   31.10
   9  10   1  -39.90   40.30
 -10 -10  -1   67.59   44.40
 -10 -10  -1   16.90   30.50
  10  10   1    9.60   36.10
  10  10   1  129.49   59.69
 -11 -10  -1  181.18   55.29
  11  10   1  203.18   79.29
  11  10   1  109.69   47.50
 -12 -10  -1   33.10   53.89
  12  10   1   96.19   48.90
  12  10   1   11.00   59.89
  16 -11  -1   66.49   46.00
 -16  11   1   98.09   49.80
 -16  11   1  130.99   58.79
  15 -11  -1  368.66   68.49
 -15  11   1  272.37   65.99
 -15  11   1  381.36   76.19
  14 -11  -1  548.35   78.39
  14 -11  -1  493.95   67.19
 -14  11   1  420.76   69.39
 -14  11   1  345.27   66.69
  13 -11  -1   14.90   28.90
  13 -11  -1   39.10   34.50
 -13  11   1   24.90   36.80
 -13  11   1   19.20   32.10
 -13  11   1  -16.20   22.90
  12 -11  -1   93.49   40.40
  12 -11  -1  107.19   36.50
 -12  11   1  166.98   48.60
 -12  11   1   68.79   36.80
 -12  11   1  143.79   37.50
  11 -11  -1  -28.80   24.40
  11 -11  -1  -41.70   22.10
 -11  11   1    0.50   28.40
 -11  11   1  -21.70   23.70
 -11  11   1   14.10   27.20
  10 -11  -1   84.29   33.60
  10 -11  -1   35.80   30.20
 -10  11   1   90.39   35.70
 -10  11   1   99.99   36.90
   9 -11  -1  353.66   52.49
   9 -11  -1  335.67   49.20
  -9  11   1  334.47   53.19
  -9  11   1  409.56   58.99
   8 -11  -1  713.53   73.39
   8 -11  -1  765.62   64.19
  -8  11   1  890.41   71.89
  -8  11   1  813.62   65.29
   7 -11  -1  962.40   67.69
   7 -11  -1 1017.00   59.29
  -7  11   1  937.01   70.79
  -7  11   1  889.71   52.19
  -7  11   1  962.10   67.59
   6 -11  -1  -16.90   20.00
   6 -11  -1   27.00   20.70
   6 -11  -1   27.60   17.80
  -6  11   1   14.80   18.30
  -6  11   1   -2.70   20.40
  -6  11   1   23.80   13.80
   5 -11  -1  835.32   62.09
   5 -11  -1  877.11   49.10
   5 -11  -1  968.00   54.69
   5 -11  -1  825.22   58.19
  -5  11   1  916.81   59.69
  -5  11   1  868.81   62.49
  -5  11   1  810.62   48.50
   4 -11  -1  122.39   29.50
   4 -11  -1  101.39   21.40
   4 -11  -1  153.18   26.60
   4 -11  -1   96.99   22.30
  -4  11   1  166.88   29.90
  -4  11   1  114.39   25.90
   3 -11  -1  321.17   41.00
   3 -11  -1  385.16   36.70
   3 -11  -1  337.57   39.60
   3 -11  -1  252.07   32.10
  -3  11   1  261.47   28.50
  -3  11   1  319.17   38.60
  -3  11   1  307.07   36.50
   2 -11  -1   30.40   17.30
   2 -11  -1    8.80   17.90
   2 -11  -1  -11.90   15.40
  -2  11   1   19.60   15.60
  -2  11   1    0.40   12.50
  -2  11   1    4.70   14.40
   1 -11  -1  132.99   28.30
   1 -11  -1  168.48   28.30
   1 -11  -1  161.58   25.50
  -1  11   1  140.59   29.60
  -1  11   1  185.88   27.50
  -1  11   1  122.29   23.10
  -1  11   1  122.49   17.90
   0 -11  -1  798.02   57.79
   0 -11  -1  892.21   54.39
   0  11   1  831.32   50.09
   0  11   1  760.12   42.60
   0  11   1  810.12   62.69
   0  11   1  903.81   55.39
  -1 -11  -1  827.72   47.70
  -1 -11  -1  946.01   61.89
  -1 -11  -1  984.60   58.29
   1  11   1 1065.09   72.29
   1  11   1  883.31   47.90
  -2 -11  -1   21.90   15.70
  -2 -11  -1   51.39   23.10
  -2 -11  -1    6.70   20.10
   2  11   1   53.89   14.80
   2  11   1   52.29   31.00
  -3 -11  -1  839.72   60.29
  -3 -11  -1  814.42   47.70
  -3 -11  -1  917.31   60.79
   3  11   1  916.31   77.99
   3  11   1  852.91   59.89
  -4 -11  -1   18.40   16.70
  -4 -11  -1  -10.90   22.20
  -4 -11  -1   -7.00   21.70
   4  11   1   -0.10   34.40
   4  11   1   -2.40   21.10
  -5 -11  -1   14.60   27.50
  -5 -11  -1   36.60   19.40
  -5 -11  -1   22.40   25.00
   5  11   1   49.90   28.30
   5  11   1   19.00   37.10
  -6 -11  -1  224.28   38.00
  -6 -11  -1  216.18   31.10
  -6 -11  -1  238.18   41.30
   6  11   1  212.98   37.50
   6  11   1  230.28   34.60
   6  11   1  197.08   59.39
  -7 -11  -1  301.87   36.20
  -7 -11  -1  243.88   39.10
  -7 -11  -1  328.17   50.09
   7  11   1  243.18   46.60
   7  11   1  366.56   68.19
   7  11   1  303.37   42.10
  -8 -11  -1  665.33   56.49
  -8 -11  -1  682.33   59.19
  -8 -11  -1  743.63   73.69
   8  11   1  786.32   73.69
   8  11   1  613.44   90.49
  -9 -11  -1   37.80   27.90
  -9 -11  -1   23.00   38.00
   9  11   1   22.90   50.49
   9  11   1   -2.90   34.90
 -10 -11  -1  391.96   65.59
  10  11   1  420.56   97.09
  10  11   1  430.86   60.89
 -11 -11  -1   82.09   53.39
  11  11   1   20.40   44.30
  11  11   1   46.80   65.69
  16 -12  -1   76.79   49.60
 -16  12   1   34.30   42.50
 -16  12   1    9.40   40.70
  15 -12  -1   -9.70   38.10
 -15  12   1  -27.10   33.90
 -15  12   1   35.50   43.30
  14 -12  -1   22.80   38.90
  14 -12  -1   29.50   34.60
 -14  12   1   66.69   45.70
 -14  12   1   62.89   43.70
  13 -12  -1   83.99   40.00
  13 -12  -1   46.20   38.00
 -13  12   1   72.29   34.40
 -13  12   1   83.09   41.30
 -13  12   1   49.30   39.70
  12 -12  -1  462.65   66.29
  12 -12  -1  503.15   66.99
 -12  12   1  397.26   65.89
 -12  12   1  381.06   61.89
 -12  12   1  515.05   62.49
  11 -12  -1  161.78   41.60
  11 -12  -1  141.09   41.70
 -11  12   1  175.08   47.50
 -11  12   1  133.49   43.00
  10 -12  -1  780.82   78.79
  10 -12  -1  791.02   78.09
 -10  12   1  776.92   80.59
 -10  12   1  805.32   86.39
   9 -12  -1  619.94   71.49
   9 -12  -1  657.63   71.79
  -9  12   1  745.73   71.29
  -9  12   1  807.92   81.39
   8 -12  -1  186.08   36.50
  -8  12   1  117.69   33.20
  -8  12   1  169.18   41.50
   7 -12  -1   61.09   23.60
   7 -12  -1   94.09   28.70
   7 -12  -1  189.38   38.40
  -7  12   1  129.59   33.20
  -7  12   1  184.18   38.40
   6 -12  -1  167.88   32.20
   6 -12  -1  156.88   36.70
   6 -12  -1  168.38   29.70
  -6  12   1  174.38   35.00
  -6  12   1   86.29   25.60
   5 -12  -1  898.31   62.59
   5 -12  -1  877.31   66.29
   5 -12  -1  896.51   52.59
   5 -12  -1  876.91   56.09
  -5  12   1  932.01   62.09
  -5  12   1  895.31   64.99
   4 -12  -1 1360.66   71.69
   4 -12  -1 1245.88   79.29
   4 -12  -1 1238.78   74.29
   4 -12  -1 1263.57   68.49
  -4  12   1 1249.28   74.99
  -4  12   1 1298.07   77.09
   3 -12  -1  426.46   46.00
   3 -12  -1  390.86   46.90
   3 -12  -1  456.35   43.20
  -3  12   1  349.57   40.60
  -3  12   1  402.36   34.60
  -3  12   1  382.46   41.40
   2 -12  -1  775.02   55.49
   2 -12  -1  891.31   58.29
   2 -12  -1  847.02   62.39
  -2  12   1  961.00   56.69
  -2  12   1  781.62   55.59
  -2  12   1  833.62   55.99
   1 -12  -1   23.50   17.90
   1 -12  -1   20.10   19.10
   1 -12  -1    9.10   20.10
  -1  12   1   31.20   19.00
  -1  12   1    2.50   19.20
  -1  12   1   15.50   17.80
  -1  12   1   16.40   11.30
   0 -12  -1  157.68   31.80
   0 -12  -1  149.79   27.70
   0 -12  -1  183.18   32.00
   0  12   1  235.98   41.60
   0  12   1  110.19   23.60
   0  12   1  156.08   26.30
   0  12   1  119.19   18.50
  -1 -12  -1   36.30   21.70
  -1 -12  -1   22.20   22.80
   1  12   1   39.80   24.60
   1  12   1  -11.50   26.70
   1  12   1   14.00   13.70
   1  12   1   31.00   19.00
  -2 -12  -1  217.38   33.40
  -2 -12  -1  219.18   26.10
  -2 -12  -1  186.48   33.60
   2  12   1  215.38   46.30
  -3 -12  -1  124.19   23.40
  -3 -12  -1  146.79   35.30
  -3 -12  -1  167.68   34.40
   3  12   1  118.69   42.30
   3  12   1   95.69   32.30
  -4 -12  -1   10.80   26.10
  -4 -12  -1    2.20   16.60
  -4 -12  -1   16.20   25.70
   4  12   1   -5.50   23.50
   4  12   1  -14.10   34.80
  -5 -12  -1  802.52   52.79
  -5 -12  -1  908.91   70.19
  -5 -12  -1  956.50   67.69
   5  12   1  786.32   66.39
   5  12   1 1006.50  104.39
  -6 -12  -1  245.38   45.60
  -6 -12  -1  158.68   29.60
  -6 -12  -1  194.08   38.60
   6  12   1  187.18   64.99
   6  12   1  176.58   44.50
  -7 -12  -1   20.90   23.70
  -7 -12  -1   -6.70   27.90
  -7 -12  -1   67.39   37.00
   7  12   1   30.20   32.60
   7  12   1   -6.20   49.70
  -8 -12  -1   72.39   29.80
  -8 -12  -1  115.69   44.80
   8  12   1  123.19   40.90
   8  12   1   98.09   56.39
  -9 -12  -1   71.89   43.60
   9  12   1   26.20   53.79
   9  12   1   -3.60   35.80
 -10 -12  -1  132.59   52.29
  10  12   1  105.59   65.29
  10  12   1  146.49   50.09
  11  12   1   19.00   45.90
  16 -13  -1   36.90   44.80
 -16  13   1   27.20   44.40
 -16  13   1   -7.90   42.00
  15 -13  -1  385.66   72.19
  15 -13  -1  204.98   78.99
 -15  13   1  435.36   81.39
 -15  13   1  326.77   70.79
  14 -13  -1  359.26   64.29
  14 -13  -1  436.36   72.49
 -14  13   1  463.75   80.79
 -14  13   1  402.26   70.79
  13 -13  -1   10.60   36.00
  13 -13  -1   76.99   37.40
 -13  13   1   39.10   40.50
 -13  13   1   16.10   36.30
 -13  13   1  -24.10   27.60
  12 -13  -1   34.50   33.50
  12 -13  -1   54.59   34.00
 -12  13   1    1.80   33.70
 -12  13   1   47.10   35.50
 -12  13   1   39.10   30.90
  11 -13  -1   12.60   29.80
  11 -13  -1   78.19   37.90
 -11  13   1   96.29   43.00
 -11  13   1   35.90   34.80
  10 -13  -1  308.07   56.79
  10 -13  -1  300.87   51.19
 -10  13   1  274.97   52.69
 -10  13   1  365.16   60.29
   9 -13  -1  801.22   81.39
   9 -13  -1  812.32   71.19
  -9  13   1  843.42   84.49
  -9  13   1  652.23   70.09
   8 -13  -1  151.58   36.30
  -8  13   1  265.97   47.10
  -8  13   1  192.58   39.90
   7 -13  -1  692.03   51.39
   7 -13  -1  588.54   62.69
   7 -13  -1  723.13   75.19
  -7  13   1  606.44   59.59
  -7  13   1  597.64   66.99
   6 -13  -1  -10.60   23.90
   6 -13  -1   72.09   26.80
   6 -13  -1   18.50   20.50
  -6  13   1   21.20   23.20
  -6  13   1   16.50   25.50
   5 -13  -1  608.94   48.30
   5 -13  -1  587.94   42.50
   5 -13  -1  513.05   53.99
   5 -13  -1  614.04   65.89
  -5  13   1  577.84   59.39
  -5  13   1  435.76   48.60
   4 -13  -1  310.87   46.30
   4 -13  -1  461.75   44.70
   4 -13  -1  382.76   46.30
  -4  13   1  333.37   43.80
  -4  13   1  309.57   41.00
   3 -13  -1   41.10   25.20
   3 -13  -1    9.90   19.50
   3 -13  -1    1.00   18.30
  -3  13   1    6.00   16.80
  -3  13   1   42.40   23.40
  -3  13   1   28.80   22.50
   2 -13  -1  287.17   41.00
   2 -13  -1  278.97   38.20
   2 -13  -1  226.38   35.90
  -2  13   1  374.26   39.50
  -2  13   1  252.27   37.50
   1 -13  -1    2.30   21.30
   1 -13  -1   16.70   20.30
   1 -13  -1   30.10   20.30
  -1  13   1    5.60   20.00
  -1  13   1   25.50   26.60
  -1  13   1   47.00   22.00
   0 -13  -1 1349.66   79.69
   0 -13  -1 1262.17   74.69
   0 -13  -1 1366.96   81.99
   0  13   1 1070.49   66.39
   0  13   1 1246.68   85.69
   0  13   1 1272.77   75.39
   0  13   1 1338.87   71.39
  -1 -13  -1  984.90   63.59
  -1 -13  -1  874.01   67.39
   1  13   1  877.51   62.59
   1  13   1  970.60   79.09
   1  13   1  907.61   57.49
  -2 -13  -1   87.39   20.20
  -2 -13  -1   67.89   27.30
  -2 -13  -1   54.89   28.00
   2  13   1   38.30   25.20
   2  13   1   49.30   36.60
  -3 -13  -1  694.13   59.59
  -3 -13  -1  586.54   43.70
  -3 -13  -1  599.94   58.89
   3  13   1  657.03   77.99
  -4 -13  -1   29.70   21.30
  -4 -13  -1   12.30   27.00
  -4 -13  -1   42.00   30.50
   4  13   1    5.90   27.00
   4  13   1   -5.10   38.90
  -5 -13  -1   53.89   23.40
  -5 -13  -1  138.29   35.90
  -5 -13  -1   80.59   33.50
   5  13   1   74.39   33.70
   5  13   1  106.29   50.59
  -6 -13  -1  102.19   35.10
  -6 -13  -1   52.39   34.80
  -6 -13  -1   89.69   26.70
   6  13   1  110.59   38.70
   6  13   1    0.60   49.20
  -7 -13  -1  179.48   47.50
  -7 -13  -1  169.38   40.30
   7  13   1  201.38   50.09
   7  13   1  329.57   78.09
  -8 -13  -1  361.06   58.89
   8  13   1  291.67   52.39
   8  13   1  127.59   63.69
  -9 -13  -1   78.09   47.10
   9  13   1  -67.39   38.80
   9  13   1  -24.80   53.99
 -10 -13  -1  274.67   65.39
  10  13   1  305.27   61.19
  10  13   1  411.36   92.49
  15 -14  -1  -18.70   36.70
  15 -14  -1  -14.70   39.20
 -15  14   1   20.20   40.90
 -15  14   1   18.10   43.60
  14 -14  -1    1.00   38.80
  14 -14  -1   55.49   41.70
 -14  14   1  115.79   51.79
 -14  14   1   31.20   42.40
  13 -14  -1   28.60   35.00
  13 -14  -1  113.99   47.00
 -13  14   1  104.89   47.00
 -13  14   1  -13.90   30.30
 -13  14   1   46.90   36.00
  12 -14  -1  510.85   69.49
  12 -14  -1  442.26   67.59
 -12  14   1  410.36   67.39
 -12  14   1  405.16   71.79
  11 -14  -1   59.89   35.80
  11 -14  -1    6.60   28.30
 -11  14   1   14.50   31.20
 -11  14   1   21.20   37.50
  10 -14  -1  534.55   68.69
  10 -14  -1  604.94   76.29
 -10  14   1  543.25   66.49
 -10  14   1  813.52   88.09
   9 -14  -1  379.96   55.19
   9 -14  -1  359.96   58.59
  -9  14   1  398.26   60.59
  -9  14   1  378.46   61.59
   8 -14  -1   14.90   26.90
   8 -14  -1   -1.00   21.20
  -8  14   1   -8.00   22.40
  -8  14   1  -34.80   25.80
   7 -14  -1  -32.00   23.20
   7 -14  -1  -21.90   19.80
   7 -14  -1   44.80   28.70
  -7  14   1   19.50   30.40
  -7  14   1  -15.00   21.50
   6 -14  -1   49.20   31.10
   6 -14  -1   64.79   23.70
   6 -14  -1   44.60   24.70
  -6  14   1   21.40   28.80
  -6  14   1   41.80   25.40
   5 -14  -1 1844.62   97.19
   5 -14  -1 1509.25   86.09
   5 -14  -1 1535.35   98.79
  -5  14   1 1585.44   93.19
  -5  14   1 1529.85   95.49
   4 -14  -1  430.66   47.00
   4 -14  -1  342.07   49.90
   4 -14  -1  446.36   49.50
  -4  14   1  310.07   41.80
  -4  14   1  441.86   36.60
  -4  14   1  403.86   50.09
   3 -14  -1  104.79   28.10
   3 -14  -1  160.18   37.40
   3 -14  -1  148.29   33.50
  -3  14   1   19.20   21.80
  -3  14   1  110.49   29.80
  -3  14   1   85.99   25.40
   2 -14  -1  518.75   53.09
   2 -14  -1  742.33   54.59
   2 -14  -1  445.26   54.89
  -2  14   1  616.84   50.69
  -2  14   1  352.76   42.60
   1 -14  -1   69.79   29.50
   1 -14  -1   90.19   27.50
   1 -14  -1   48.40   26.80
  -1  14   1  135.29   28.80
  -1  14   1   41.40   22.20
   0 -14  -1   72.59   30.70
   0 -14  -1   60.39   30.00
   0 -14  -1  153.48   34.00
   0  14   1   80.69   25.90
   0  14   1   52.79   37.90
   0  14   1   84.59   27.00
  -1 -14  -1   35.30   25.60
  -1 -14  -1   46.70   31.00
   1  14   1   48.70   25.30
   1  14   1   71.79   39.20
   1  14   1   53.39   24.50
  -2 -14  -1  184.48   39.20
  -2 -14  -1  215.58   38.30
   2  14   1  153.08   49.10
   2  14   1  224.38   41.50
   2  14   1  192.98   33.60
  -3 -14  -1  303.47   47.70
  -3 -14  -1  265.07   44.20
  -3 -14  -1  313.77   33.70
   3  14   1  312.97   64.99
  -4 -14  -1   -6.80   28.70
  -4 -14  -1   24.60   21.80
  -4 -14  -1   27.40   28.40
   4  14   1   83.39   49.99
  -5 -14  -1 1223.48   89.09
  -5 -14  -1 1301.47   85.09
  -5 -14  -1 1075.49   68.29
   5  14   1 1293.17  113.39
  -6 -14  -1  193.78   46.80
  -6 -14  -1  247.48   43.80
   6  14   1  132.99   43.50
   6  14   1   69.59   54.79
  -7 -14  -1   -7.50   33.30
  -7 -14  -1   -0.40   38.30
   7  14   1   15.80   37.80
   7  14   1   38.40   53.99
  -8 -14  -1  -23.90   40.60
   8  14   1  -15.60   38.10
   8  14   1   28.90   60.09
  -9 -14  -1  -24.20   41.20
   9  14   1  -18.90   49.40
   9  14   1  -30.10   43.90
  15 -15  -1  239.48   64.69
  15 -15  -1  316.27   66.39
 -15  15   1  311.77   72.79
 -15  15   1  301.97   67.49
  14 -15  -1  261.07   59.59
  14 -15  -1  222.58   56.49
 -14  15   1  249.38   55.99
 -14  15   1  197.38   62.09
 -14  15   1  231.28   63.79
  13 -15  -1    8.50   31.50
  13 -15  -1   -7.60   33.90
 -13  15   1   -7.30   33.20
 -13  15   1   55.29   37.40
 -13  15   1   16.60   38.30
  12 -15  -1   46.60   37.90
  12 -15  -1   31.50   37.80
 -12  15   1   25.30   36.80
 -12  15   1  -14.80   34.90
  11 -15  -1   24.70   30.50
  11 -15  -1   28.20   35.20
 -11  15   1   41.10   33.00
 -11  15   1   38.60   40.90
  10 -15  -1  264.27   51.39
  10 -15  -1  188.48   47.80
 -10  15   1  217.48   47.10
 -10  15   1  305.57   61.49
   9 -15  -1  211.48   46.80
  -9  15   1  293.07   57.39
  -9  15   1  238.78   52.39
   8 -15  -1   11.30   28.50
   8 -15  -1   21.70   24.20
  -8  15   1   78.79   38.50
  -8  15   1   42.50   30.80
   7 -15  -1  723.63   79.89
   7 -15  -1  791.22   60.49
   7 -15  -1  806.92   77.99
  -7  15   1  849.61   75.09
  -7  15   1  640.84   70.39
   6 -15  -1   18.00   30.70
   6 -15  -1  -11.10   21.10
   6 -15  -1   18.40   25.80
  -6  15   1   27.40   26.20
  -6  15   1   60.39   32.00
   5 -15  -1  369.26   49.80
   5 -15  -1  481.15   51.29
   5 -15  -1  469.95   60.69
  -5  15   1  347.77   50.19
  -5  15   1  447.86   55.49
   4 -15  -1  188.68   35.80
   4 -15  -1  150.88   38.70
   4 -15  -1  141.79   34.80
  -4  15   1  140.39   36.60
  -4  15   1  137.49   32.80
  -4  15   1  139.19   26.40
   3 -15  -1   59.39   27.60
   3 -15  -1  117.29   36.00
   3 -15  -1   65.39   28.30
  -3  15   1  102.29   27.60
  -3  15   1   59.09   28.50
  -3  15   1   83.39   30.30
   2 -15  -1  311.77   45.00
   2 -15  -1  348.17   50.99
   2 -15  -1  340.47   45.10
  -2  15   1  413.26   48.10
  -2  15   1  212.38   37.60
   1 -15  -1   48.60   28.60
   1 -15  -1  -35.60   21.50
   1 -15  -1   34.90   24.40
  -1  15   1    6.10   25.20
  -1  15   1   11.10   21.50
   0 -15  -1 1719.43   99.39
   0 -15  -1 1628.04   96.19
   0 -15  -1 1691.73  103.19
   0  15   1 1551.94   95.19
   0  15   1 1805.52   93.69
   0  15   1 1853.91  112.89
  -1 -15  -1  341.07   53.09
  -1 -15  -1  399.56   47.80
  -1 -15  -1  284.17   48.60
   1  15   1  243.28   41.50
   1  15   1  387.06   64.59
   1  15   1  430.76   46.30
  -2 -15  -1   33.40   28.00
  -2 -15  -1  129.99   38.20
   2  15   1   78.29   28.00
   2  15   1   64.19   29.20
   2  15   1  195.78   49.90
  -3 -15  -1  143.39   37.50
  -3 -15  -1   90.89   33.90
  -3 -15  -1   73.09   24.70
   3  15   1  126.99   54.69
   3  15   1   70.99   33.50
  -4 -15  -1   -7.10   27.30
  -4 -15  -1  -21.40   29.10
  -4 -15  -1   34.90   34.30
   4  15   1   34.00   50.59
  -5 -15  -1   67.49   35.20
  -5 -15  -1   55.29   39.60
   5  15   1   35.60   36.50
   5  15   1   58.99   51.59
  -6 -15  -1   20.60   39.50
  -6 -15  -1   43.80   34.40
   6  15   1   25.40   34.90
   6  15   1   22.20   48.70
  -7 -15  -1   62.39   44.50
   7  15   1  121.79   62.69
   7  15   1  190.18   56.49
  -8 -15  -1  220.48   56.99
   8  15   1  147.69   70.59
   8  15   1  108.69   50.59
  -9 -15  -1   -8.40   46.60
   9  15   1   40.30   52.29
   9  15   1   61.29   62.99
  15 -16  -1   63.69   43.80
  15 -16  -1   21.90   46.60
 -15  16   1   56.39   53.69
 -15  16   1  112.29   57.89
  14 -16  -1   30.30   40.10
  14 -16  -1  -26.30   39.20
 -14  16   1   15.20   41.90
 -14  16   1   97.09   48.80
 -14  16   1  -18.40   37.50
  13 -16  -1   -2.70   33.90
  13 -16  -1   33.60   41.30
 -13  16   1   -1.00   36.50
 -13  16   1   11.40   35.10
 -13  16   1   51.29   39.50
  12 -16  -1  471.75   73.09
  12 -16  -1  519.05   72.89
 -12  16   1  782.42   95.79
 -12  16   1  549.25   79.29
  11 -16  -1   -9.60   28.70
  11 -16  -1   33.80   37.30
 -11  16   1   -4.40   30.60
 -11  16   1   16.70   42.80
  10 -16  -1  694.33   84.49
  10 -16  -1  764.42   81.89
 -10  16   1  980.30   98.59
 -10  16   1  754.22   81.49
   9 -16  -1  186.98   46.80
  -9  16   1  274.37   49.50
  -9  16   1  238.68   54.49
   8 -16  -1   10.40   25.50
   8 -16  -1  -21.50   25.30
   8 -16  -1   19.60   35.10
  -8  16   1   -1.90   26.50
  -8  16   1   42.30   37.60
   7 -16  -1   74.39   28.80
   7 -16  -1  121.79   44.50
   7 -16  -1   81.99   32.50
  -7  16   1  127.89   42.20
  -7  16   1   88.39   32.10
   6 -16  -1   28.00   27.70
   6 -16  -1  -10.40   24.70
   6 -16  -1   74.69   37.70
  -6  16   1   25.50   31.80
  -6  16   1   27.60   28.30
   5 -16  -1 1407.86   96.79
   5 -16  -1 1299.67   82.59
   5 -16  -1 1347.57   91.39
  -5  16   1 1278.17   88.89
  -5  16   1 1416.56   93.89
   4 -16  -1  265.37   49.80
   4 -16  -1  146.49   35.40
   4 -16  -1  327.77   46.50
  -4  16   1  228.18   31.90
  -4  16   1  226.78   39.70
  -4  16   1  293.67   47.80
   3 -16  -1   86.59   31.90
   3 -16  -1  135.19   35.10
   3 -16  -1  104.79   36.00
  -3  16   1   60.99   29.00
  -3  16   1  128.69   30.90
  -3  16   1  179.38   39.00
   2 -16  -1  314.97   53.59
   2 -16  -1  293.87   45.30
   2 -16  -1  270.77   42.40
  -2  16   1  282.07   44.90
  -2  16   1  259.77   43.90
   1 -16  -1   38.90   32.80
   1 -16  -1    3.00   26.50
   1 -16  -1  -17.50   27.50
  -1  16   1   21.10   25.90
  -1  16   1  -33.10   24.50
   0 -16  -1  -37.20   27.50
   0 -16  -1   -1.70   26.90
   0 -16  -1   26.10   31.30
   0  16   1   47.50   38.80
   0  16   1    6.60   25.00
   0  16   1  103.29   32.60
  -1 -16  -1  108.39   33.60
  -1 -16  -1   37.00   33.10
  -1 -16  -1   71.29   35.60
   1  16   1   16.00   27.50
   1  16   1   62.59   46.10
   1  16   1   52.59   30.40
  -2 -16  -1   51.69   33.40
  -2 -16  -1   85.19   32.20
   2  16   1   66.19   28.80
   2  16   1   78.69   30.00
   2  16   1   72.79   47.00
  -3 -16  -1   49.30   34.20
  -3 -16  -1   81.99   37.00
   3  16   1   95.89   35.90
   3  16   1  122.09   34.30
   3  16   1  133.59   55.39
  -4 -16  -1  -26.40   31.60
  -4 -16  -1   69.89   38.00
   4  16   1  -12.90   45.10
   4  16   1   16.50   32.10
  -5 -16  -1  538.35   69.19
  -5 -16  -1  758.32   74.49
   5  16   1  695.13  104.29
  -6 -16  -1  211.68   45.90
  -6 -16  -1   54.59   45.90
   6  16   1  203.68   70.99
  -7 -16  -1   30.40   45.00
   7  16   1   21.70   43.30
   7  16   1  102.59   64.29
  -8 -16  -1    9.60   50.79
   8  16   1   -8.90   40.20
   8  16   1   36.20   65.69
  14 -17  -1   73.39   42.40
  14 -17  -1  106.79   47.50
 -14  17   1   52.39   46.50
 -14  17   1   81.89   52.99
 -14  17   1    9.70   44.60
  13 -17  -1  -38.00   34.30
  13 -17  -1  -13.00   36.90
 -13  17   1   39.60   44.70
 -13  17   1   11.80   39.30
  12 -17  -1  -43.10   29.80
  12 -17  -1    3.30   38.70
 -12  17   1  -26.80   37.00
 -12  17   1   83.89   40.40
  11 -17  -1   63.69   40.90
  11 -17  -1   67.19   39.50
 -11  17   1   80.89   43.10
 -11  17   1   53.89   48.80
  10 -17  -1  299.07   57.09
  10 -17  -1  258.77   56.79
 -10  17   1  215.88   48.60
 -10  17   1  315.37   63.69
   9 -17  -1   63.39   37.10
   9 -17  -1   64.69   41.10
  -9  17   1   27.40   41.60
  -9  17   1   65.69   36.10
   8 -17  -1   87.39   36.40
   8 -17  -1  110.19   46.10
   8 -17  -1   54.29   27.50
  -8  17   1   54.49   37.70
  -8  17   1   69.29   35.80
   7 -17  -1  648.54   71.49
   7 -17  -1  625.34   79.49
   7 -17  -1  731.53   62.39
  -7  17   1  513.25   66.99
  -7  17   1  525.55   70.49
   6 -17  -1   15.20   33.00
   6 -17  -1   14.00   29.00
   6 -17  -1  -15.80   26.60
  -6  17   1   29.30   34.20
  -6  17   1   12.90   27.00
   5 -17  -1  163.98   40.90
   5 -17  -1  257.87   53.09
   5 -17  -1  264.67   43.30
  -5  17   1  217.38   46.20
  -5  17   1  142.29   41.50
   4 -17  -1   -0.70   31.40
   4 -17  -1   52.09   31.20
   4 -17  -1   74.89   32.10
  -4  17   1   38.90   33.00
  -4  17   1   94.19   28.80
  -4  17   1   40.30   29.30
   3 -17  -1   39.20   31.70
   3 -17  -1   35.80   29.40
   3 -17  -1   -1.70   27.10
  -3  17   1   18.00   26.10
  -3  17   1   75.79   28.80
  -3  17   1   35.00   33.10
   2 -17  -1  221.48   44.20
   2 -17  -1  214.08   41.70
   2 -17  -1  187.38   47.00
  -2  17   1  132.29   34.80
  -2  17   1  210.88   41.20
   1 -17  -1   61.19   31.50
   1 -17  -1   -4.30   31.40
   1 -17  -1   37.70   32.50
  -1  17   1   45.00   31.30
  -1  17   1   34.20   25.90
   0 -17  -1 1500.55  100.49
   0 -17  -1 1380.86   93.59
   0 -17  -1 1325.07   89.19
   0  17   1 1395.56   84.59
   0  17   1 1318.17   90.59
  -1 -17  -1   74.79   35.00
  -1 -17  -1   23.30   35.70
  -1 -17  -1  126.99   41.70
   1  17   1   93.09   50.89
   1  17   1   62.69   33.20
   1  17   1  102.49   35.10
  -2 -17  -1   45.70   41.70
  -2 -17  -1  112.49   37.20
  -2 -17  -1  119.59   41.90
   2  17   1   -8.40   47.60
   2  17   1   86.19   31.60
   2  17   1   37.60   29.40
  -3 -17  -1   39.40   33.90
  -3 -17  -1   37.90   36.10
   3  17   1  129.99   56.19
   3  17   1   16.30   29.40
   3  17   1   34.10   31.00
  -4 -17  -1   -5.30   35.90
  -4 -17  -1   40.30   35.50
   4  17   1   56.49   52.99
   4  17   1   21.30   31.30
   4  17   1   41.90   32.20
  -5 -17  -1  -22.30   37.60
  -5 -17  -1   44.90   37.90
   5  17   1   -2.60   37.90
   5  17   1  219.68   74.39
  -6 -17  -1   89.39   47.00
   6  17   1   56.29   60.39
  -7 -17  -1   80.99   52.49
   7  17   1  115.09   73.49
  14 -18  -1   61.69   46.50
  14 -18  -1   15.50   42.50
 -14  18   1    0.10   44.50
 -14  18   1   79.29   50.99
 -14  18   1   -4.10   41.50
  13 -18  -1   37.60   44.40
  13 -18  -1  -11.70   38.50
 -13  18   1   60.49   50.59
 -13  18   1   74.09   48.20
  12 -18  -1  477.15   71.99
  12 -18  -1  396.26   72.59
 -12  18   1  484.45   81.69
 -12  18   1  481.55   74.29
  11 -18  -1   -1.40   35.50
  11 -18  -1   12.90   37.80
 -11  18   1   -2.90   34.30
 -11  18   1  -18.50   43.70
  10 -18  -1  309.77   59.49
  10 -18  -1  354.86   65.59
 -10  18   1  273.97   56.39
 -10  18   1  441.06   74.19
   9 -18  -1   47.20   37.60
  -9  18   1   59.99   36.20
  -9  18   1   32.40   41.00
   8 -18  -1   20.80   29.60
   8 -18  -1   58.09   42.10
   8 -18  -1   42.40   37.40
  -8  18   1  100.99   45.30
  -8  18   1   89.89   38.80
   7 -18  -1   41.90   32.60
   7 -18  -1   85.79   36.20
   7 -18  -1   14.20   38.70
  -7  18   1   -4.80   35.40
  -7  18   1   37.20   32.40
   6 -18  -1  104.29   39.00
   6 -18  -1  178.68   40.40
   6 -18  -1   47.70   37.60
  -6  18   1  100.89   36.90
  -6  18   1  126.49   43.80
   5 -18  -1  894.11   90.29
   5 -18  -1 1194.18   79.49
   5 -18  -1  869.81   86.49
  -5  18   1  914.61   81.19
  -5  18   1 1058.39   84.59
  -5  18   1  876.81   62.39
   4 -18  -1  133.99   46.20
   4 -18  -1  193.88   42.10
   4 -18  -1  109.79   37.70
  -4  18   1  215.68   36.60
  -4  18   1   92.09   34.70
  -4  18   1  167.18   43.50
   3 -18  -1  248.48   45.80
   3 -18  -1  253.07   51.39
   3 -18  -1  264.87   47.70
  -3  18   1  281.47   44.20
  -3  18   1  284.57   47.90
  -3  18   1  188.28   42.10
   2 -18  -1  226.38   46.80
   2 -18  -1  150.58   38.30
   2 -18  -1  226.08   50.29
  -2  18   1  125.39   34.10
  -2  18   1  206.18   44.60
   1 -18  -1  -16.80   34.50
   1 -18  -1   -0.70   26.50
   1 -18  -1   26.20   35.10
  -1  18   1  -19.40   26.60
  -1  18   1   12.60   24.80
   0 -18  -1    1.10   35.60
   0 -18  -1   -4.30   32.10
   0 -18  -1   10.40   29.30
   0  18   1   16.10   27.00
   0  18   1  -13.80   30.90
  -1 -18  -1   -7.90   32.40
  -1 -18  -1   -1.60   31.40
  -1 -18  -1   58.69   39.60
   1  18   1   36.40   34.10
   1  18   1   27.10   48.60
   1  18   1   41.60   32.30
  -2 -18  -1   84.59   40.70
  -2 -18  -1   79.79   41.60
  -2 -18  -1   70.89   43.20
   2  18   1  123.39   57.29
   2  18   1   65.39   34.90
   2  18   1   98.79   38.20
  -3 -18  -1   60.49   38.90
  -3 -18  -1   54.19   37.80
  -3 -18  -1   19.10   44.80
   3  18   1   43.10   54.39
   3  18   1   70.39   34.00
  -4 -18  -1    3.30   36.70
  -4 -18  -1   52.39   40.60
   4  18   1   37.30   53.79
   4  18   1   42.10   34.80
  -5 -18  -1  382.36   62.69
  -5 -18  -1  384.66   60.29
   5  18   1  213.48   50.69
   5  18   1  315.07   84.29
  -6 -18  -1   35.60   45.30
   6  18   1   50.29   61.99
   6  18   1  -15.70   35.90
  14 -19  -1   40.20   45.40
  14 -19  -1  102.19   54.09
 -14  19   1   64.49   52.39
 -14  19   1    2.50   43.90
 -14  19   1   12.10   51.39
  13 -19  -1   10.80   41.60
  13 -19  -1  -12.10   42.40
 -13  19   1    6.30   47.00
 -13  19   1  -74.69   43.20
  12 -19  -1   16.30   38.50
  12 -19  -1  -19.40   41.10
 -12  19   1  -15.80   48.40
 -12  19   1  -27.30   31.90
  11 -19  -1   47.60   40.90
  11 -19  -1   89.19   44.70
 -11  19   1   57.79   39.90
 -11  19   1   97.69   54.09
  10 -19  -1  327.27   61.59
  10 -19  -1  255.77   60.89
 -10  19   1  297.37   62.49
 -10  19   1  264.97   68.19
   9 -19  -1   90.09   42.50
  -9  19   1   40.80   35.00
  -9  19   1   67.49   49.30
   8 -19  -1  247.68   62.99
   8 -19  -1  146.39   48.90
  -8  19   1  223.68   58.19
  -8  19   1  124.79   45.50
   7 -19  -1  358.66   65.49
   7 -19  -1  367.46   53.69
   7 -19  -1  368.36   60.59
  -7  19   1  499.75   70.99
  -7  19   1  278.37   58.29
   6 -19  -1   34.90   35.10
   6 -19  -1   29.40   41.40
   6 -19  -1   40.20   33.40
  -6  19   1   23.10   32.70
  -6  19   1   34.60   39.70
   5 -19  -1  -43.50   26.40
   5 -19  -1   34.30   41.20
   5 -19  -1   21.70   32.80
  -5  19   1   85.99   43.10
  -5  19   1   57.69   42.50
  -5  19   1   30.40   34.30
   4 -19  -1   39.70   41.80
   4 -19  -1   37.70   35.40
   4 -19  -1  -30.30   28.40
  -4  19   1   56.09   29.30
  -4  19   1   31.40   35.00
  -4  19   1   34.10   31.60
   3 -19  -1  130.89   42.60
   3 -19  -1   95.79   43.80
   3 -19  -1   72.09   37.30
  -3  19   1  100.69   40.30
  -3  19   1  145.09   43.40
  -3  19   1  122.19   37.50
   2 -19  -1   77.39   43.80
   2 -19  -1  121.09   41.20
   2 -19  -1   84.39   36.10
  -2  19   1   98.59   39.00
  -2  19   1  112.09   37.80
  -2  19   1   70.19   34.70
   1 -19  -1  192.68   52.29
   1 -19  -1  113.49   44.30
   1 -19  -1  153.88   40.00
  -1  19   1  108.19   41.40
  -1  19   1   90.49   33.70
   0 -19  -1  683.33   69.89
   0 -19  -1  738.23   83.69
   0 -19  -1  679.63   77.39
   0  19   1  826.52   71.89
   0  19   1  469.95   66.49
  -1 -19  -1  106.29   45.90
  -1 -19  -1   88.19   37.90
  -1 -19  -1   31.90   41.70
   1  19   1    0.00   32.70
   1  19   1   61.09   34.10
  -2 -19  -1  149.99   47.10
  -2 -19  -1  119.89   50.09
  -2 -19  -1   98.29   40.60
   2  19   1  134.69   61.59
   2  19   1   71.79   34.40
  -3 -19  -1   86.79   49.50
  -3 -19  -1   92.79   44.10
  -3 -19  -1   85.69   45.80
   3  19   1  121.29   64.89
   3  19   1   40.90   37.10
  -4 -19  -1   43.70   51.49
  -4 -19  -1   23.70   40.70
  -4 -19  -1  -23.80   37.80
   4  19   1   92.79   63.69
   4  19   1   30.80   34.80
  -5 -19  -1  115.29   51.79
  -5 -19  -1   85.79   57.89
   5  19   1    9.50   61.49
   5  19   1   60.19   43.50
  13 -20  -1   44.20   43.30
  13 -20  -1   18.40   49.50
 -13  20   1  132.49   63.49
 -13  20   1   45.30   45.90
  12 -20  -1  226.68   59.59
  12 -20  -1  303.27   71.99
 -12  20   1  368.26   79.09
 -12  20   1  357.86   74.29
  11 -20  -1   -0.10   39.30
  11 -20  -1   18.80   39.10
 -11  20   1   35.30   53.49
 -11  20   1   23.50   41.50
  10 -20  -1  163.78   54.19
  10 -20  -1  131.59   51.69
 -10  20   1  185.38   62.29
 -10  20   1  118.69   49.70
   9 -20  -1   76.59   46.00
  -9  20   1   96.79   44.50
  -9  20   1  133.39   52.29
   8 -20  -1   16.00   42.70
   8 -20  -1   57.99   42.80
  -8  20   1   -9.20   33.70
  -8  20   1   39.50   44.60
   7 -20  -1   36.90   45.20
   7 -20  -1    6.10   36.20
   7 -20  -1  117.69   47.40
  -7  20   1   30.40   39.40
  -7  20   1   60.49   42.30
   6 -20  -1  115.39   52.99
   6 -20  -1   94.89   43.20
   6 -20  -1  216.88   46.40
  -6  20   1  136.69   48.50
  -6  20   1   60.59   35.30
   5 -20  -1  750.32   92.59
   5 -20  -1  466.95   64.89
   5 -20  -1  531.95   67.39
  -5  20   1  473.15   71.29
  -5  20   1  751.12   79.29
   4 -20  -1  134.79   44.30
   4 -20  -1  127.99   42.30
   4 -20  -1   75.69   44.60
  -4  20   1  155.68   45.90
  -4  20   1  135.19   39.00
  -4  20   1   69.59   37.70
   3 -20  -1  147.99   52.09
   3 -20  -1   60.09   37.30
   3 -20  -1   55.19   38.10
  -3  20   1  122.59   44.50
  -3  20   1  141.29   42.30
  -3  20   1  136.59   43.80
   2 -20  -1  198.38   44.70
   2 -20  -1  260.47   51.69
   2 -20  -1  162.88   49.00
  -2  20   1   79.69   34.30
  -2  20   1  177.68   45.20
  -2  20   1  123.69   44.70
   1 -20  -1   38.70   34.90
   1 -20  -1   30.80   40.30
   1 -20  -1   27.20   40.30
  -1  20   1    8.80   30.90
  -1  20   1    6.30   34.00
   0 -20  -1   49.60   41.50
   0 -20  -1   24.70   36.30
   0 -20  -1   26.00   44.60
   0  20   1   64.49   34.30
  -1 -20  -1   -7.30   42.00
  -1 -20  -1    8.60   35.00
  -1 -20  -1   36.40   43.90
   1  20   1   33.00   35.20
  -2 -20  -1   53.09   44.70
  -2 -20  -1   41.10   39.90
  -2 -20  -1  114.69   51.89
   2  20   1   28.10   36.60
  -3 -20  -1   99.49   50.09
  -3 -20  -1   61.09   43.20
  -3 -20  -1  111.69   52.99
   3  20   1  140.69   46.10
   3  20   1  163.68   72.19
  -4 -20  -1   88.49   57.39
  -4 -20  -1  139.59   53.09
  -4 -20  -1  205.18   53.39
   4  20   1   72.49   45.00
   4  20   1   78.49   64.59
  12 -21  -1   -0.50   43.00
  12 -21  -1  -13.40   40.40
 -12  21   1   22.40   59.59
 -12  21   1   37.80   49.40
  11 -21  -1   71.49   45.10
  11 -21  -1  141.99   55.69
 -11  21   1  105.89   60.99
 -11  21   1   46.10   49.50
  10 -21  -1  227.38   62.59
  10 -21  -1  266.37   65.89
 -10  21   1  380.46   65.59
 -10  21   1  581.44   88.39
   9 -21  -1   27.60   41.50
  -9  21   1   95.59   52.09
  -9  21   1   34.70   38.40
   8 -21  -1  186.68   58.59
   8 -21  -1   77.99   45.90
  -8  21   1  104.49   44.60
  -8  21   1  198.48   62.49
   7 -21  -1  463.35   82.89
   7 -21  -1  180.78   52.29
  -7  21   1  318.97   62.89
[truncated: 10,723,613 more chars]
